# Supplementary material for: Diet Breadth Mediates the Prey Specificity of Venom Potency in Snakes
Source: MDPI journal article supplement (doi:10.3390/toxins12020074), 2020-01-23
Supplement: s1 [file s1]

# Supplementary Materials: Diet Breadth Mediates the Prey Specificity of Venom Potency in Snakes

Keith Lyons, Michel M. Dugon and Kevin Healy

**Table S1.** Models with proportion of endothermic prey items included as a fixed factor. Modes ( $\beta$ ) and 95% credibility intervals (Lower CI and Upper CI) of the posterior distributions from the three main models predicting LD<sub>50</sub> using Taxonomic richness, Phylogenetic Diversity and Species Richness as measures of diet breadth. Fixed factors include the continuous factors of mean phylogenetic distance between diet species and the LD<sub>50</sub> model (D<sub>LD50-Diet</sub>); the proportion of endothermic prey in the diet (Prey met) and Diet Breadth (DB) in models that use Phylogenetic Diversity and Species Richness. Categorical fixed factors include LD<sub>50</sub> method (subcutaneous (SC), intravenous (IV), intraperitoneal (IP) and intramuscular (IM)); the presence of eggs in the diet (Eggs in Diet; present, absent) and the Taxonomic Richness measure of Diet Breadth. For categorical factors the baseline was SC for LD<sub>50</sub> method; the absence of eggs for the Eggs in Diet and low for Taxonomic Richness. DB<sub>Low</sub>:D<sub>LD50-Diet</sub> represents the interaction term between DB and D<sub>LD50-Diet</sub>. The random terms associated with phylogenetic relatedness (Phylogeny ( $h^2$ )), intraspecific variation (Species) and residual variation (Residual) are also presented. Significant values, which are highlighted in bold, are deemed to be those with 95% of the posterior estimate above or below zero. All models have 529 LD<sub>50</sub> measures for 100 species.

|                                           | Taxonomic Richness Model |              |              | Phylogenetic Diversity Model |              |              | Species Richness Model |              |              |
|-------------------------------------------|--------------------------|--------------|--------------|------------------------------|--------------|--------------|------------------------|--------------|--------------|
|                                           | $\beta$                  | Lower CI     | Upper CI     | $\beta$                      | Lower CI     | Upper CI     | $\beta$                | Lower CI     | Upper CI     |
| <b>Fixed Terms</b>                        |                          |              |              |                              |              |              |                        |              |              |
| Intercept                                 | 0.34                     | −0.11        | 0.80         | 0.41                         | −0.01        | 0.88         | 0.41                   | −0.05        | 0.88         |
| LD <sub>50</sub> method <sub>sc</sub>     |                          |              |              |                              |              |              |                        |              |              |
| IV                                        | <b>−0.52</b>             | <b>−0.66</b> | <b>−0.38</b> | <b>−0.52</b>                 | <b>−0.66</b> | <b>0.37</b>  | <b>−0.52</b>           | <b>−0.67</b> | <b>−0.38</b> |
| IP                                        | <b>−0.26</b>             | <b>−0.41</b> | <b>−0.11</b> | <b>−0.25</b>                 | <b>−0.41</b> | <b>−0.10</b> | <b>−0.26</b>           | <b>−0.40</b> | <b>−0.12</b> |
| IM                                        | −0.12                    | −0.31        | 0.04         | −0.11                        | −0.28        | 0.07         | −0.11                  | −0.29        | 0.05         |
| Eggs in Diet <sub>absent</sub>            |                          |              |              |                              |              |              |                        |              |              |
| Present                                   | <b>0.90</b>              | <b>0.38</b>  | <b>1.40</b>  | <b>0.88</b>                  | <b>0.36</b>  | <b>1.40</b>  | <b>0.89</b>            | <b>0.42</b>  | <b>1.49</b>  |
| D <sub>LD50-Diet</sub>                    | <b>0.23</b>              | <b>0.13</b>  | <b>0.34</b>  | <b>0.12</b>                  | <b>0.03</b>  | <b>0.21</b>  | <b>0.13</b>            | <b>0.04</b>  | <b>0.21</b>  |
| Diet Breadth <sub>Low</sub>               |                          |              |              | 0.03                         | −0.06        | 0.12         | 0.02                   | −0.07        | 0.11         |
| Intermediate                              |                          |              |              | —                            | —            | —            | —                      | —            | —            |
| High                                      |                          |              |              | —                            | —            | —            | —                      | —            | —            |
| DB <sub>Low</sub> :D <sub>LD50-Diet</sub> |                          |              |              | −0.06                        | −0.13        | 0.01         | −0.05                  | −0.12        | 0.01         |
| Intermediate                              | <b>−0.22</b>             | <b>−0.38</b> | <b>−0.06</b> |                              |              |              | —                      | —            | —            |
| High                                      | <b>−0.23</b>             | <b>−0.47</b> | <b>−0.01</b> |                              |              |              | —                      | —            | —            |
| Prey met                                  | 0.09                     | −0.09        | 0.24         | 0.11                         | −0.04        | 0.27         | 0.12                   | −0.04        | 0.30         |
| <b>Random Terms</b>                       |                          |              |              |                              |              |              |                        |              |              |
| Phylogeny ( $h^2$ )                       | 0.38                     | 0.15         | 0.68         | 0.42                         | 0.17         | 0.69         | 0.43                   | 0.18         | 0.70         |
| Species                                   | 0.16                     | 0.01         | 0.34         | 0.15                         | 0.01         | 0.34         | 0.15                   | 0.01         | 0.33         |
| Residuals                                 | 0.43                     | 0.27         | 0.54         | 0.41                         | 0.26         | 0.54         | 0.40                   | 0.26         | 0.53         |

**Table S2.** Models with presence of constriction included as a fixed factor. Modes ( $\beta$ ) and 95% credibility intervals (Lower CI and Upper CI) of the posterior distributions from the three main models predicting LD<sub>50</sub> using Taxonomic richness, Phylogenetic Diversity and Species Richness as measures of diet breadth. Fixed factors include the continuous factors of mean phylogenetic distance between diet species and the LD<sub>50</sub> model (D<sub>LD50-Diet</sub>) and Diet Breadth (DB) in the case of Phylogenetic Diversity and Species Richness. Categorical fixed factors include LD<sub>50</sub> method (subcutaneous (SC), intravenous (IV), intraperitoneal (IP) and intramuscular (IM)); the presence of eggs in the diet (Eggs in Diet; present, absent); the presence of constriction behavior (Constriction) and the Taxonomic Richness measure of Diet Breadth. For categorical factors the baseline was SC for LD<sub>50</sub> method; the absence of eggs for the Eggs in Diet; the presence of constriction behavior (Constriction) and low for Taxonomic Richness. DB<sub>Low</sub>:D<sub>LD50-Diet</sub> represents the interaction term between DB and D<sub>LD50-Diet</sub>. The random terms associated with phylogenetic

relatedness (Phylogeny ( $h^2$ )), intraspecific variation (Species) and residual variation (Residual) are also presented. Significant values, which are highlighted in bold, are deemed to be those with 95% of the posterior estimate above or below zero. All models have 529 LD<sub>50</sub> measures for 100 species.

|                                           | Taxonomic Richness Model |              |              | Phylogenetic Diversity Model |              |              | Species Richness Model |              |              |
|-------------------------------------------|--------------------------|--------------|--------------|------------------------------|--------------|--------------|------------------------|--------------|--------------|
|                                           | $\beta$                  | Upper CI     | Upper CI     | $\beta$                      | Lower CI     | Upper CI     | $\beta$                | Lower CI     | Upper CI     |
| <b>Fixed Terms</b>                        |                          |              |              |                              |              |              |                        |              |              |
| Intercept                                 | 0.35                     | −0.11        | 0.84         | 0.31                         | −0.21        | 0.79         | 0.31                   | −0.18        | 0.81         |
| LD <sub>50</sub> method <sub>SC</sub>     |                          |              |              |                              |              |              |                        |              |              |
| IV                                        | <b>−0.53</b>             | <b>−0.66</b> | <b>−0.37</b> | <b>−0.52</b>                 | <b>−0.67</b> | <b>−0.39</b> | <b>−0.52</b>           | <b>−0.67</b> | <b>−0.39</b> |
| IP                                        | <b>−0.26</b>             | <b>−0.41</b> | <b>−0.11</b> | <b>−0.25</b>                 | <b>−0.40</b> | <b>−0.11</b> | <b>−0.25</b>           | <b>−0.39</b> | <b>−0.10</b> |
| IM                                        | −0.12                    | −0.31        | 0.04         | −0.10                        | −0.27        | 0.07         | −0.10                  | −0.28        | 0.07         |
| Eggs in Diet <sub>absent</sub>            |                          |              |              |                              |              |              |                        |              |              |
| Present                                   | <b>0.90</b>              | <b>0.40</b>  | <b>1.43</b>  | <b>0.89</b>                  | <b>0.33</b>  | <b>1.42</b>  | <b>0.91</b>            | <b>0.38</b>  | <b>1.45</b>  |
| D <sub>LD50-Diet</sub>                    | <b>0.22</b>              | <b>0.12</b>  | <b>0.32</b>  | <b>0.12</b>                  | <b>0.03</b>  | <b>0.21</b>  | <b>0.13</b>            | <b>0.04</b>  | <b>0.21</b>  |
| Diet Breadth <sub>Low</sub>               |                          |              |              | 0.04                         | −0.05        | 0.14         | 0.02                   | −0.07        | 0.12         |
| Intermediate                              | 0.08                     | −0.19        | 0.34         |                              |              |              |                        |              |              |
| High                                      | 0.13                     | −0.14        | 0.45         |                              |              |              |                        |              |              |
| DB <sub>Low</sub> :D <sub>LD50-Diet</sub> |                          |              |              | −0.06                        | −0.13        | 0.02         | −0.05                  | −0.12        | 0.02         |
| Intermediate                              | <b>−0.22</b>             | <b>−0.41</b> | <b>−0.06</b> |                              |              |              |                        |              |              |
| High                                      | <b>−0.25</b>             | <b>−0.50</b> | <b>−0.02</b> |                              |              |              |                        |              |              |
| Constriction <sub>absent</sub>            |                          |              |              |                              |              |              |                        |              |              |
| Present                                   | −0.14                    | −0.75        | 0.42         | −0.18                        | −0.73        | 0.45         | −0.17                  | −0.81        | 0.38         |
| <b>Random Terms</b>                       |                          |              |              |                              |              |              |                        |              |              |
| Phylogeny ( $h^2$ )                       | 0.42                     | 0.18         | 0.68         | 0.46                         | 0.21         | 0.71         | 0.46                   | 0.21         | 0.72         |
| Species                                   | 0.15                     | 0.01         | 0.33         | 0.13                         | 0.01         | 0.31         | 0.13                   | 0.01         | 0.31         |
| Residuals                                 | 0.41                     | 0.26         | 0.54         | 0.39                         | 0.26         | 0.52         | 0.39                   | 0.25         | 0.52         |

**Table S3.** Models with mean prey size included as a fixed factor. Modes ( $\beta$ ) and 95% credibility intervals (Lower CI and Upper CI) of the posterior distributions from the three main models predicting LD<sub>50</sub> using Taxonomic richness, Phylogenetic Diversity and Species Richness as measures of diet breadth. Fixed factors include the continuous factors of mean phylogenetic distance between diet species and the LD<sub>50</sub> model (D<sub>LD50-Diet</sub>); mean prey size and Diet Breadth (DB) in models that use Phylogenetic Diversity and Species Richness. Categorical fixed factors include LD<sub>50</sub> method (subcutaneous (SC), intravenous (IV), intraperitoneal (IP) and intramuscular (IM)); the presence of eggs in the diet (Eggs in Diet; present, absent) and the Taxonomic Richness measure of Diet Breadth. For categorical factors the baseline was SC for LD<sub>50</sub> method; the absence of eggs for the Eggs in Diet and low for Taxonomic Richness. DB<sub>Low</sub>:D<sub>LD50-Diet</sub> represents the interaction term between DB and D<sub>LD50-Diet</sub>. The random terms associated with phylogenetic relatedness (Phylogeny ( $h^2$ )), intraspecific variation (Species) and residual variation (Residual) are also presented. Significant values, which are highlighted in bold, are deemed to be those with 95% of the posterior estimate above or below zero. All models have 396 LD<sub>50</sub> measures for 70 species.

|                                           | Taxonomic Richness Model |              |              | Phylogenetic Diversity Model |              |              | Species Richness Model |              |              |
|-------------------------------------------|--------------------------|--------------|--------------|------------------------------|--------------|--------------|------------------------|--------------|--------------|
|                                           | $\beta$                  | Lower CI     | Upper CI     | $\beta$                      | Lower CI     | Upper CI     | $\beta$                | Lower CI     | Upper CI     |
| <b>Fixed Terms</b>                        |                          |              |              |                              |              |              |                        |              |              |
| Intercept                                 | 0.33                     | −0.23        | 0.90         | 0.41                         | −0.20        | 0.99         | 0.40                   | −0.17        | 0.96         |
| LD <sub>50</sub> method <sub>SC</sub>     |                          |              |              |                              |              |              |                        |              |              |
| IV                                        | <b>−0.53</b>             | <b>−0.70</b> | <b>−0.36</b> | <b>−0.53</b>                 | <b>−0.71</b> | <b>−0.36</b> | <b>−0.54</b>           | <b>−0.72</b> | <b>−0.37</b> |
| IP                                        | <b>−0.32</b>             | <b>−0.48</b> | <b>−0.13</b> | <b>−0.31</b>                 | <b>−0.46</b> | <b>−0.13</b> | <b>−0.31</b>           | <b>−0.49</b> | <b>−0.14</b> |
| IM                                        | −0.14                    | −0.35        | 0.06         | −0.12                        | −0.31        | 0.09         | −0.13                  | −0.33        | 0.09         |
| Eggs in Diet <sub>absent</sub>            |                          |              |              |                              |              |              |                        |              |              |
| Present                                   | <b>0.75</b>              | <b>0.18</b>  | <b>1.32</b>  | <b>0.71</b>                  | <b>0.11</b>  | <b>1.26</b>  | <b>0.73</b>            | <b>0.14</b>  | <b>1.31</b>  |
| D <sub>LD50-Diet</sub>                    | <b>0.27</b>              | <b>0.16</b>  | <b>0.38</b>  | <b>0.14</b>                  | <b>0.04</b>  | <b>0.25</b>  | <b>0.17</b>            | <b>0.07</b>  | <b>0.27</b>  |
| Diet Breadth <sub>Low</sub>               |                          |              |              | 0.05                         | −0.06        | 0.17         | 0.04                   | −0.07        | 0.15         |
| Intermediate                              | 0.14                     | −0.13        | 0.47         |                              |              |              |                        |              |              |
| High                                      | 0.08                     | −0.26        | 0.40         |                              |              |              |                        |              |              |
| DB <sub>Low</sub> :D <sub>LD50-Diet</sub> |                          |              |              | −0.07                        | −0.17        | 0.02         | −0.06                  | −0.16        | 0.02         |

|                     |              |              |              |      |       |      |      |       |      |
|---------------------|--------------|--------------|--------------|------|-------|------|------|-------|------|
| <i>Intermediate</i> | <b>−0.30</b> | <b>−0.51</b> | <b>−0.09</b> |      |       |      |      |       |      |
| <i>High</i>         | −0.24        | −0.53        | 0.08         |      |       |      |      |       |      |
| Mean prey size      | 0.08         | −0.04        | 0.18         | 0.06 | −0.07 | 0.18 | 0.07 | −0.06 | 0.19 |
| <b>Random Terms</b> |              |              |              |      |       |      |      |       |      |
| Phylogeny ( $h^2$ ) | 0.63         | 0.33         | 0.79         | 0.66 | 0.29  | 0.79 | 0.68 | 0.32  | 0.80 |
| Species             | 0.01         | 0.01         | 0.23         | 0.01 | 0.01  | 0.26 | 0.01 | 0.01  | 0.26 |
| Residuals           | 0.36         | 0.23         | 0.51         | 0.34 | 0.21  | 0.50 | 0.33 | 0.20  | 0.48 |

**Table S4.** Models with LD<sub>50</sub> duration included as a fixed factor. Modes ( $\beta$ ) and 95% credibility intervals (Lower CI and Upper CI) of the posterior distributions from the three main models predicting LD<sub>50</sub> using Taxonomic richness, Phylogenetic Diversity and Species Richness as measures of diet breadth. Fixed factors include the continuous factors of mean phylogenetic distance between diet species and the LD<sub>50</sub> model ( $D_{LD50-Diet}$ ); the duration of the LD<sub>50</sub> experiment (LD<sub>50</sub> Duration) and Diet Breadth (DB) in models that use Phylogenetic Diversity and Species Richness. Categorical fixed factors include LD<sub>50</sub> method (subcutaneous (SC), intravenous (IV), intraperitoneal (IP) and intramuscular (IM)); the presence of eggs in the diet (Eggs in Diet; present, absent) and the Taxonomic Richness measure of Diet Breadth. For categorical factors the baseline was SC for LD<sub>50</sub> method; the absence of eggs for the Eggs in Diet and low for Taxonomic Richness.  $DB_{Low:D_{LD50-Diet}}$  represents the interaction term between DB and  $D_{LD50-Diet}$ . The random terms associated with phylogenetic relatedness (Phylogeny ( $h^2$ )), intraspecific variation (Species) and residual variation (Residual) are also presented. Significant values, which are highlighted in bold, are deemed to be those with 95% of the posterior estimate above or below zero. All models have 315 LD<sub>50</sub> measures for 82 species.

|                                       | Taxonomic Richness Model |              |              | Phylogenetic Diversity Model |              |              | Species Richness Model |              |              |
|---------------------------------------|--------------------------|--------------|--------------|------------------------------|--------------|--------------|------------------------|--------------|--------------|
|                                       | $\beta$                  | Lower CI     | Upper CI     | $\beta$                      | Lower CI     | Upper CI     | $\beta$                | Lower CI     | Upper CI     |
| <b>Fixed Terms</b>                    |                          |              |              |                              |              |              |                        |              |              |
| Intercept                             | 0.06                     | −0.45        | 0.63         | 0.27                         | −0.21        | 0.82         | 0.24                   | −0.27        | 0.74         |
| LD <sub>50</sub> method <sub>SC</sub> |                          |              |              |                              |              |              |                        |              |              |
| IV                                    | <b>−0.54</b>             | <b>−0.80</b> | <b>−0.28</b> | <b>−0.53</b>                 | <b>−0.80</b> | <b>−0.27</b> | <b>−0.52</b>           | <b>−0.80</b> | <b>−0.27</b> |
| IP                                    | −0.21                    | −0.46        | 0.05         | −0.19                        | −0.46        | 0.05         | −0.17                  | −0.42        | 0.12         |
| IM                                    | −0.05                    | −0.32        | 0.24         | −0.03                        | −0.31        | 0.26         | −0.01                  | −0.31        | 0.27         |
| Eggs in Diet <sub>absent</sub>        |                          |              |              |                              |              |              |                        |              |              |
| Present                               | <b>0.96</b>              | <b>0.25</b>  | <b>1.62</b>  | <b>0.91</b>                  | <b>0.09</b>  | <b>1.61</b>  | <b>0.96</b>            | <b>0.23</b>  | <b>1.66</b>  |
| $D_{LD50-Diet}$                       | <b>0.24</b>              | <b>0.12</b>  | <b>0.35</b>  | <b>0.10</b>                  | <b>0.01</b>  | <b>0.20</b>  | <b>0.12</b>            | <b>0.02</b>  | <b>0.21</b>  |
| Diet Breadth <sub>Low</sub>           |                          |              |              | 0.05                         | −0.07        | 0.17         | 0.02                   | −0.09        | 0.13         |
| Intermediate                          | 0.27                     | −0.05        | 0.59         | —                            | —            | —            | —                      | —            | —            |
| High                                  | 0.32                     | −0.07        | 0.69         | —                            | —            | —            | —                      | —            | —            |
| $DB_{Low:D_{LD50-Diet}}$              |                          |              |              | −0.08                        | −0.17        | 0.02         | −0.07                  | −0.17        | 0.02         |
| Intermediate                          | <b>−0.28</b>             | <b>−0.47</b> | <b>−0.09</b> | —                            | —            | —            | —                      | —            | —            |
| High                                  | −0.26                    | −0.55        | 0.01         | —                            | —            | —            | —                      | —            | —            |
| LD <sub>50</sub> Duration             | −0.02                    | −0.09        | 0.04         | −0.02                        | −0.08        | 0.04         | −0.02                  | −0.09        | 0.04         |
| <b>Random Terms</b>                   |                          |              |              |                              |              |              |                        |              |              |
| Phylogeny ( $h^2$ )                   | 0.32                     | 0.08         | 0.63         | 0.35                         | 0.13         | 0.67         | 0.38                   | 0.14         | 0.68         |
| Species                               | 0.23                     | 0.03         | 0.45         | 0.21                         | 0.02         | 0.43         | 0.21                   | 0.01         | 0.41         |
| Residuals                             | 0.40                     | 0.26         | 0.55         | 0.38                         | 0.24         | 0.53         | 0.38                   | 0.23         | 0.52         |

**Table S5.** Models with the wild/captive status of the LD<sub>50</sub> model included as a fixed factor. Modes ( $\beta$ ) and 95% credibility intervals (Lower CI and Upper CI) of the posterior distributions from the three main models predicting LD<sub>50</sub> using Taxonomic richness, Phylogenetic Diversity and Species Richness as measures of diet breadth. Fixed factors include the continuous factors of mean phylogenetic distance between diet species and the LD<sub>50</sub> model ( $D_{LD50-Diet}$ ) and Diet Breadth (DB) in models that use Phylogenetic Diversity and Species Richness. Categorical fixed factors include LD<sub>50</sub> method (subcutaneous (SC), intravenous (IV), intraperitoneal (IP) and intramuscular (IM)); the presence of eggs in the diet (Eggs in Diet; present, absent); the wild/captive origin of the LD<sub>50</sub> model (LD<sub>50</sub> captive, wild captive) and the Taxonomic Richness measure of Diet Breadth. For categorical factors the baseline was SC for LD<sub>50</sub> method; the absence of eggs for the Eggs in Diet; Captive for LD<sub>50</sub> captive and low for Taxonomic Richness.  $DB_{Low:D_{LD50-Diet}}$  represents the interaction term between DB and  $D_{LD50-Diet}$ . The random terms associated

with phylogenetic relatedness (Phylogeny ( $h^2$ )), intraspecific variation (Species) and residual variation (Residual) are also presented. Significant values, which are highlighted in bold, are deemed to be those with 95% of the posterior estimate above or below zero. All models have 492 LD<sub>50</sub> measures for 100 species.

| Taxonomic Richness Model                  |              |              |              | Phylogenetic Diversity Model |              |              | Species Richness Model |              |              |
|-------------------------------------------|--------------|--------------|--------------|------------------------------|--------------|--------------|------------------------|--------------|--------------|
|                                           | $\beta$      | Lower CI     | Upper CI     | $\beta$                      | Lower CI     | Upper CI     | $\beta$                | Lower CI     | Upper CI     |
| <b>Fixed Terms</b>                        |              |              |              |                              |              |              |                        |              |              |
| Intercept                                 | 0.33         | −0.14        | 0.77         | 0.38                         | −0.07        | 0.87         | 0.37                   | −0.12        | 0.83         |
| LD <sub>50</sub> method <sub>SC</sub>     |              |              |              |                              |              |              |                        |              |              |
| IV                                        | <b>−0.43</b> | <b>−0.56</b> | <b>−0.30</b> | <b>−0.43</b>                 | <b>−0.56</b> | <b>−0.30</b> | <b>−0.43</b>           | <b>−0.56</b> | <b>−0.30</b> |
| IP                                        | <b>−0.30</b> | <b>−0.43</b> | <b>−0.18</b> | <b>−0.30</b>                 | <b>−0.43</b> | <b>−0.17</b> | <b>−0.30</b>           | <b>−0.44</b> | <b>−0.17</b> |
| IM                                        | −0.13        | −0.29        | 0.02         | −0.14                        | −0.29        | 0.04         | −0.14                  | −0.30        | 0.04         |
| Eggs in Diet <sub>absent</sub>            |              |              |              |                              |              |              |                        |              |              |
| Present                                   | <b>0.87</b>  | <b>0.40</b>  | <b>1.34</b>  | <b>0.86</b>                  | <b>0.37</b>  | <b>1.35</b>  | <b>0.89</b>            | <b>0.43</b>  | <b>1.43</b>  |
| D <sub>LD50-Diet</sub>                    | <b>0.27</b>  | <b>0.17</b>  | <b>0.36</b>  | <b>0.17</b>                  | <b>0.10</b>  | <b>0.26</b>  | <b>0.19</b>            | <b>0.11</b>  | <b>0.27</b>  |
| Diet Breadth <sub>Low</sub>               |              |              |              | 0.01                         | −0.07        | 0.10         | 0.01                   | −0.07        | 0.10         |
| Intermediate                              | 0.05         | −0.21        | 0.29         | —                            | —            | —            | —                      | —            | —            |
| High                                      | 0.11         | −0.18        | 0.40         | —                            | —            | —            | —                      | —            | —            |
| DB <sub>Low</sub> :D <sub>LD50-Diet</sub> |              |              |              | −0.04                        | −0.10        | 0.03         | −0.02                  | −0.09        | 0.05         |
| Intermediate                              | −0.13        | −0.30        | 0.02         | —                            | —            | —            | —                      | —            | —            |
| High                                      | <b>−0.38</b> | <b>−0.61</b> | <b>−0.14</b> | —                            | —            | —            | —                      | —            | —            |
| LD <sub>50</sub> captive                  |              |              |              |                              |              |              |                        |              |              |
| Wild                                      | <b>0.25</b>  | <b>0.07</b>  | <b>0.41</b>  | <b>0.25</b>                  | <b>0.09</b>  | <b>0.43</b>  | <b>0.27</b>            | <b>0.09</b>  | <b>0.44</b>  |
| <b>Random Terms</b>                       |              |              |              |                              |              |              |                        |              |              |
| Phylogeny ( $h^2$ )                       | 0.48         | 0.24         | 0.73         | 0.53                         | 0.28         | 0.77         | 0.56                   | 0.28         | 0.78         |
| Species                                   | 0.16         | 0.01         | 0.34         | 0.14                         | 0.01         | 0.30         | 0.11                   | 0.01         | 0.30         |
| Residuals                                 | 0.35         | 0.22         | 0.47         | 0.33                         | 0.21         | 0.46         | 0.31                   | 0.21         | 0.45         |

**Table S6.** Sensitivity analysis of Taxonomic Richness Models. Modes ( $\beta$ ) and 95% credibility intervals (Lower CI and Upper CI) of the posterior distributions from the sensitivity analysis models predicting LD<sub>50</sub> using Taxonomic richness with differing category definitions. Fixed factors include the continuous factors mean phylogenetic distance between diet species and the LD<sub>50</sub> model (D<sub>LD50-Diet</sub>). Categorical fixed factors include LD<sub>50</sub> method (subcutaneous (SC), intravenous (IV), intraperitoneal (IP) and intramuscular (IM)); the presence of eggs in the diet (Eggs in Diet; present, absent) and Taxonomic richness (Diet Breadth, Low, Intermediate and high). The baseline was SC for LD<sub>50</sub> method, the absence of eggs for the Eggs in Diet and Low for Diet Breadth. For the sensitivity analysis 1 taxonomic richness was split as low (1 taxonomic group present in the diet), intermediate (2–3 taxonomic groups) and high (more than 3 taxonomic groups) and for sensitivity analysis 2 taxonomic richness was split as low (1 taxonomic group), intermediate (2–4 taxonomic groups) and high (more than 4 taxonomic groups). DB<sub>Low</sub>:D<sub>LD50-Diet</sub> represents the interaction term between DB and D<sub>LD50-Diet</sub>. The random terms associated with phylogenetic relatedness (Phylogeny ( $h^2$ )), intraspecific variation (Species) and residual variation (Residual) are also presented. Significant values, which are highlighted in bold, are deemed to be those with 95% of the posterior estimate above or below zero. All models have 529 LD<sub>50</sub> measures for 100 species.

|                                       | Sensitivity Analysis 1 |              |              | Sensitivity analysis 2 |              |              |
|---------------------------------------|------------------------|--------------|--------------|------------------------|--------------|--------------|
|                                       | $\beta$                | Lower CI     | Upper CI     | $\beta$                | Lower CI     | Upper CI     |
| <b>Fixed Terms</b>                    |                        |              |              |                        |              |              |
| Intercept                             | 0.33                   | −0.11        | 0.85         | 0.34                   | −0.14        | 0.83         |
| LD <sub>50</sub> method <sub>SC</sub> |                        |              |              |                        |              |              |
| IV                                    | <b>−0.53</b>           | <b>−0.65</b> | <b>−0.37</b> | <b>−0.53</b>           | <b>−0.68</b> | <b>−0.40</b> |
| IP                                    | <b>−0.27</b>           | <b>−0.41</b> | <b>−0.13</b> | <b>−0.26</b>           | <b>−0.41</b> | <b>−0.12</b> |
| IM                                    | −0.12                  | −0.28        | 0.07         | −0.12                  | −0.29        | 0.05         |
| Eggs in Diet <sub>absent</sub>        |                        |              |              |                        |              |              |
| Present                               | <b>0.89</b>            | <b>0.36</b>  | <b>1.38</b>  | <b>0.89</b>            | <b>0.38</b>  | <b>1.39</b>  |
| D <sub>LD50-Diet</sub>                | <b>0.22</b>            | <b>0.12</b>  | <b>0.32</b>  | <b>0.22</b>            | <b>0.11</b>  | <b>0.33</b>  |
| Diet Breadth <sub>Low</sub>           |                        |              |              |                        |              |              |

|                                           |              |              |              |              |              |              |
|-------------------------------------------|--------------|--------------|--------------|--------------|--------------|--------------|
| <i>Intermediate</i>                       | 0.07         | −0.20        | 0.30         | 0.07         | −0.17        | 0.31         |
| <i>High</i>                               | 0.17         | −0.29        | 0.59         | 0.16         | −0.25        | 0.64         |
| DB <sub>Low</sub> :D <sub>LD50-Diet</sub> |              |              |              |              |              |              |
| <i>Intermediate</i>                       | <b>−0.22</b> | <b>−0.37</b> | <b>−0.06</b> | <b>−0.22</b> | <b>−0.39</b> | <b>−0.06</b> |
| <i>High</i>                               | <b>−0.26</b> | <b>−0.50</b> | <b>−0.01</b> | −0.25        | −0.50        | 0.01         |
| <b>Random Terms</b>                       |              |              |              |              |              |              |
| Phylogeny (h <sup>2</sup> )               | 0.44         | 0.20         | 0.68         | 0.44         | 0.20         | 0.68         |
| Species                                   | 0.15         | 0.01         | 0.32         | 0.15         | 0.01         | 0.31         |
| Residuals                                 | 0.40         | 0.26         | 0.54         | 0.39         | 0.27         | 0.53         |
