# Supplementary material for: Diet Breadth Mediates the Prey Specificity of Venom Potency in Snakes
Source: Toxins (Basel). 2020 Jan 23;12(2):74. doi: 10.3390/toxins12020074 (PMC7076792; doi:10.3390/toxins12020074)
Supplement: Supplementary file 1 [file toxins-12-00074-s001.zip › Dataset_S1.csv]

species	family	length_cm	length_ref	mass_grams	phylo_distance_diet_model_my	venom_yield_mg	venom_yield_ref	ld50_mg	ld50_method	ld50_model_class	ld50_model	ld50_ref	fishes	inverts	amphibians	reptiles	birds	eggs	mammals	egg.bin	diet_refs	diet_pd_full	prey_taxa_richness_from_pd_full
Acalyptophis_peronii	Elapidae	140	Boback, S. M. & Guyer, C. A test of reproductive power in snakes. Ecology 89, 1428-1435 (2008)	567	419	0.33	Minton, S.A., 1983. Lethal toxicity of venoms of snakes from the Coral Sea. Toxicon, 21(6), pp.901-902.	0.079	sc	mammal	Mus_musculus	Minton 1983. Lethal Toxicity of venoms of snakes from the coral sea Toxicon 21:901	100	0	0	0	0	0	0	no	Voris, H.K. and Voris, H.H., 1983. Feeding strategies in marine snakes: an analysis of evolutionary, morphological, behavioral and ecological relationships. American Zoologist, 23(2), pp.411-425.	0	1
Acanthophis_antarcticus	Elapidae	100	Boback, S. M. & Guyer, C. A test of reproductive power in snakes. Ecology 89, 1428-1435 (2008)	252	238.5045	63	Minton S.A. (1974) Venom Diseases. Ed. Thomas C.C., Springfield, Illinois.; Eds. J. Meier and J. White (1995) Handbook of Clinical Toxicology of Animal Venoms and Poisons. CRC Press, Boca Raton; Garnet J.R. (1970) Venomous Australian Animals Dangerous to Man. Commonwealth Serum Laboratories, Parkville, Victoria.	0.4	sc	mammal	Mus_musculus	Broad, A. J., Sutherland, S. K., Coulter, A.R. (1979). The lethality in mice of dangerous Australian and other snake venoms. Toxicon (17). 664-667. 11.	0	0	6	53	9	0	32	no	Shine, R., 1980. Ecology of the Australian death adder Acanthophis antarcticus (Elapidae): evidence for convergence with the Viperidae. Herpetologica, pp.281-289.	2085.607127	13
Acanthophis_antarcticus	Elapidae	100	Boback, S. M. & Guyer, C. A test of reproductive power in snakes. Ecology 89, 1428-1435 (2008)	252	238.5045	63	Minton S.A. (1974) Venom Diseases. Ed. Thomas C.C., Springfield, Illinois.; Eds. J. Meier and J. White (1995) Handbook of Clinical Toxicology of Animal Venoms and Poisons. CRC Press, Boca Raton; Garnet J.R. (1970) Venomous Australian Animals Dangerous to Man. Commonwealth Serum Laboratories, Parkville, Victoria.	0.5	sc	mammal	Mus_musculus	Minton, S and Minton, M.R. (1969). Venomous Reptiles. Scribners New York.	0	0	6	53	9	0	32	no	Shine, R., 1980. Ecology of the Australian death adder Acanthophis antarcticus (Elapidae): evidence for convergence with the Viperidae. Herpetologica, pp.281-289.	2085.607127	13
Acanthophis_antarcticus	Elapidae	100	Boback, S. M. & Guyer, C. A test of reproductive power in snakes. Ecology 89, 1428-1435 (2008)	252	238.5045	63	Minton S.A. (1974) Venom Diseases. Ed. Thomas C.C., Springfield, Illinois.; Eds. J. Meier and J. White (1995) Handbook of Clinical Toxicology of Animal Venoms and Poisons. CRC Press, Boca Raton; Garnet J.R. (1970) Venomous Australian Animals Dangerous to Man. Commonwealth Serum Laboratories, Parkville, Victoria.	0.25	iv	mammal	Mus_musculus	Minton, S and Minton, M.R. (1969). Venomous Reptiles. Scribners New York.	0	0	6	53	9	0	32	no	Shine, R., 1980. Ecology of the Australian death adder Acanthophis antarcticus (Elapidae): evidence for convergence with the Viperidae. Herpetologica, pp.281-289.	2085.607127	13
Agkistrodon_bilineatus	Viperidae	141	Boback, S. M. & Guyer, C. A test of reproductive power in snakes. Ecology 89, 1428-1435 (2008)	1417	305.9685	269	Mirtschin, P.J., Dunstan, N., Hough, B., Hamilton, E., Klein, S., Lucas, J., Millar, D., Madaras, F. and Nias, T., 2006. Venom yields from Australian and some other species of snakes. Ecotoxicology, 15(6), pp.531-538.	0.31	iv	bird	Columba_sp	Githens, T.S., 1935. Studies on the Venoms of North American Pit Vipers. Journal of Immunology, 29(2).	0	0	11	33	0	0	56	no	Solorzano, A., Romero, M., Gutierrez, J.M. and Sasa, M., 1999. Venom composition and diet of the cantil Agkistrodon bilineatus howardgloydi (Serpentes: Viperidae). The Southwestern Naturalist, pp.478-483.	1781.416796	7
Agkistrodon_bilineatus	Viperidae	141	Boback, S. M. & Guyer, C. A test of reproductive power in snakes. Ecology 89, 1428-1435 (2008)	1417	259.033	269	Mirtschin, P.J., Dunstan, N., Hough, B., Hamilton, E., Klein, S., Lucas, J., Millar, D., Madaras, F. and Nias, T., 2006. Venom yields from Australian and some other species of snakes. Ecotoxicology, 15(6), pp.531-538.	1.25	ip	mammal	Mus_musculus	Solorzano, A., Romero, M., Gutierrez, J.M. and Sasa, M., 1999. Venom composition and diet of the cantil Agkistrodon bilineatus howardgloydi (Serpentes: Viperidae). The Southwestern Naturalist, pp.478-483.	0	0	11	33	0	0	56	no	Solorzano, A., Romero, M., Gutierrez, J.M. and Sasa, M., 1999. Venom composition and diet of the cantil Agkistrodon bilineatus howardgloydi (Serpentes: Viperidae). The Southwestern Naturalist, pp.478-483.	1781.416796	7
Agkistrodon_bilineatus	Viperidae	141	Boback, S. M. & Guyer, C. A test of reproductive power in snakes. Ecology 89, 1428-1435 (2008)	1417	259.033	269	Mirtschin, P.J., Dunstan, N., Hough, B., Hamilton, E., Klein, S., Lucas, J., Millar, D., Madaras, F. and Nias, T., 2006. Venom yields from Australian and some other species of snakes. Ecotoxicology, 15(6), pp.531-538.	1.155	ip	mammal	Mus_musculus	Kocholaty, W.F., Ledford, E.B., Daly, J.G. and Billings, T.A., 1971. Toxicity and some enzymatic properties and activities in the venoms of Crotalidae, Elapidae and Viperidae. Toxicon, 9(2), pp.131-138.	0	0	11	33	0	0	56	no	Solorzano, A., Romero, M., Gutierrez, J.M. and Sasa, M., 1999. Venom composition and diet of the cantil Agkistrodon bilineatus howardgloydi (Serpentes: Viperidae). The Southwestern Naturalist, pp.478-483.	1781.416796	7
Agkistrodon_bilineatus	Viperidae	141	Boback, S. M. & Guyer, C. A test of reproductive power in snakes. Ecology 89, 1428-1435 (2008)	1417	259.033	269	Mirtschin, P.J., Dunstan, N., Hough, B., Hamilton, E., Klein, S., Lucas, J., Millar, D., Madaras, F. and Nias, T., 2006. Venom yields from Australian and some other species of snakes. Ecotoxicology, 15(6), pp.531-538.	0.8	iv	mammal	Mus_musculus	Kocholaty, W.F., Ledford, E.B., Daly, J.G. and Billings, T.A., 1971. Toxicity and some enzymatic properties and activities in the venoms of Crotalidae, Elapidae and Viperidae. Toxicon, 9(2), pp.131-138.	0	0	11	33	0	0	56	no	Solorzano, A., Romero, M., Gutierrez, J.M. and Sasa, M., 1999. Venom composition and diet of the cantil Agkistrodon bilineatus howardgloydi (Serpentes: Viperidae). The Southwestern Naturalist, pp.478-483.	1781.416796	7
Agkistrodon_contortrix	Viperidae	135	Boback, S. M. & Guyer, C. A test of reproductive power in snakes. Ecology 89, 1428-1435 (2008)	1248	252.1881306	57	Ernst, C.H., 1979. Venomous Reptiles of North America. Smithsonian University Press, Washington, D.C.	4.99	iv	mammal	Mus_musculus	Consroe, P., Gerrish, K., Egen, N., Russell, F.E., 1992. Intravenous dose lethality of American pit viper venoms in mice using standardized	0	37	0	5	4	0	54	no	Garton, J.S. and Dimmick, R.W., 1969. Food habits of the copperhead in middle Tennessee. J. Tenn. Acad. Sci, 44, pp.113-117.	1759.997569	10
Agkistrodon_contortrix	Viperidae	135	Boback, S. M. & Guyer, C. A test of reproductive power in snakes. Ecology 89, 1428-1435 (2008)	1248	252.1881306	57	Ernst, C.H., 1979. Venomous Reptiles of North America. Smithsonian University Press, Washington, D.C.	4.222	ip	mammal	Mus_musculus	Kocholaty, W.F., Ledford, E.B., Daly, J.G. and Billings, T.A., 1971. Toxicity and some enzymatic properties and activities in the venoms of Crotalidae, Elapidae and Viperidae. Toxicon, 9(2), pp.131-138.	0	37	0	5	4	0	54	no	Garton, J.S. and Dimmick, R.W., 1969. Food habits of the copperhead in middle Tennessee. J. Tenn. Acad. Sci, 44, pp.113-117.	1759.997569	10
Agkistrodon_contortrix	Viperidae	135	Boback, S. M. & Guyer, C. A test of reproductive power in snakes. Ecology 89, 1428-1435 (2008)	1248	252.1881306	57	Ernst, C.H., 1979. Venomous Reptiles of North America. Smithsonian University Press, Washington, D.C.	2.7	iv	mammal	Mus_musculus	Kocholaty, W.F., Ledford, E.B., Daly, J.G. and Billings, T.A., 1971. Toxicity and some enzymatic properties and activities in the venoms of Crotalidae, Elapidae and Viperidae. Toxicon, 9(2), pp.131-138.	0	37	0	5	4	0	54	no	Garton, J.S. and Dimmick, R.W., 1969. Food habits of the copperhead in middle Tennessee. J. Tenn. Acad. Sci, 44, pp.113-117.	1759.997569	10
Agkistrodon_contortrix	Viperidae	135	Boback, S. M. & Guyer, C. A test of reproductive power in snakes. Ecology 89, 1428-1435 (2008)	1248	252.1881306	57	Ernst, C.H., 1979. Venomous Reptiles of North America. Smithsonian University Press, Washington, D.C.	20	im	mammal	Mus_musculus	Handbook of Natural Toxins: Reptile Venoms and Toxins	0	37	0	5	4	0	54	no	Garton, J.S. and Dimmick, R.W., 1969. Food habits of the copperhead in middle Tennessee. J. Tenn. Acad. Sci, 44, pp.113-117.	1759.997569	10
Agkistrodon_contortrix	Viperidae	135	Boback, S. M. & Guyer, C. A test of reproductive power in snakes. Ecology 89, 1428-1435 (2008)	1248	252.1881306	57	Ernst, C.H., 1979. Venomous Reptiles of North America. Smithsonian University Press, Washington, D.C.	10.92	iv	mammal	Mus_musculus	Russell 1967. Pharmacology of animal venoms. 8, 849-873	0	37	0	5	4	0	54	no	Garton, J.S. and Dimmick, R.W., 1969. Food habits of the copperhead in middle Tennessee. J. Tenn. Acad. Sci, 44, pp.113-117.	1759.997569	10
Agkistrodon_contortrix	Viperidae	135	Boback, S. M. & Guyer, C. A test of reproductive power in snakes. Ecology 89, 1428-1435 (2008)	1248	252.1881306	57	Ernst, C.H., 1979. Venomous Reptiles of North America. Smithsonian University Press, Washington, D.C.	10.5	ip	mammal	Mus_musculus	Russell 1967. Pharmacology of animal venoms. 8, 849-873	0	37	0	5	4	0	54	no	Garton, J.S. and Dimmick, R.W., 1969. Food habits of the copperhead in middle Tennessee. J. Tenn. Acad. Sci, 44, pp.113-117.	1759.997569	10
Agkistrodon_contortrix	Viperidae	135	Boback, S. M. & Guyer, C. A test of reproductive power in snakes. Ecology 89, 1428-1435 (2008)	1248	252.1881306	57	Ernst, C.H., 1979. Venomous Reptiles of North America. Smithsonian University Press, Washington, D.C.	26.1	sc	mammal	Mus_musculus	Consroe, P., Gerrish, K., Egen, N., Russell, F.E., 1992. Intravenous dose lethality of American pit viper venoms in mice using standardized	0	37	0	5	4	0	54	no	Garton, J.S. and Dimmick, R.W., 1969. Food habits of the copperhead in middle Tennessee. J. Tenn. Acad. Sci, 44, pp.113-117.	1759.997569	10
Agkistrodon_piscivorus	Viperidae	189	Boback, S. M. & Guyer, C. A test of reproductive power in snakes. Ecology 89, 1428-1435 (2008)	3323	401.5925	125	Ernst, C.H., 1979. Venomous Reptiles of North America. Smithsonian University Press, Washington, D.C.	0.31	iv	bird	Columba_sp	Githens, T.S., 1935. Studies on the Venoms of North American Pit Vipers. Journal of Immunology, 29(2).	41	19	17	22	0	0	1	no	Vincent, S.E., Herrel, A. and Irschick, D.J., 2004. Sexual dimorphism in head shape and diet in the cottonmouth snake (Agkistrodon piscivorus). Journal of Zoology, 264(1), pp.53-59.	2160.806847	5
Agkistrodon_piscivorus	Viperidae	189	Boback, S. M. & Guyer, C. A test of reproductive power in snakes. Ecology 89, 1428-1435 (2008)	3323	409.76775	125	Ernst, C.H., 1979. Venomous Reptiles of North America. Smithsonian University Press, Washington, D.C.	3.38	iv	mammal	Mus_musculus	Consroe, P., Gerrish, K., Egen, N., Russell, F.E., 1992. Intravenous dose lethality of American pit viper venoms in mice using standardized	41	19	17	22	0	0	1	no	Vincent, S.E., Herrel, A. and Irschick, D.J., 2004. Sexual dimorphism in head shape and diet in the cottonmouth snake (Agkistrodon piscivorus). Journal of Zoology, 264(1), pp.53-59.	2160.806847	5
Agkistrodon_piscivorus	Viperidae	189	Boback, S. M. & Guyer, C. A test of reproductive power in snakes. Ecology 89, 1428-1435 (2008)	3323	409.76775	125	Ernst, C.H., 1979. Venomous Reptiles of North America. Smithsonian University Press, Washington, D.C.	25.8	sc	mammal	Mus_musculus	U.S. Department of the Navy (1968) Poisonous Snakes of the World. United States Government Printing Office, Washington. D.C.; Minton S.A. (1974) Venom Diseases. Ed. Thomas C.C., Springfield, Illinois.	41	19	17	22	0	0	1	no	Vincent, S.E., Herrel, A. and Irschick, D.J., 2004. Sexual dimorphism in head shape and diet in the cottonmouth snake (Agkistrodon piscivorus). Journal of Zoology, 264(1), pp.53-59.	2160.806847	5
Agkistrodon_piscivorus	Viperidae	189	Boback, S. M. & Guyer, C. A test of reproductive power in snakes. Ecology 89, 1428-1435 (2008)	3323	409.76775	125	Ernst, C.H., 1979. Venomous Reptiles of North America. Smithsonian University Press, Washington, D.C.	25.1	sc	mammal	Mus_musculus	Consroe, P., Gerrish, K., Egen, N., Russell, F.E., 1992. Intravenous dose lethality of American pit viper venoms in mice using standardized	41	19	17	22	0	0	1	no	Vincent, S.E., Herrel, A. and Irschick, D.J., 2004. Sexual dimorphism in head shape and diet in the cottonmouth snake (Agkistrodon piscivorus). Journal of Zoology, 264(1), pp.53-59.	2160.806847	5
Agkistrodon_piscivorus	Viperidae	189	Boback, S. M. & Guyer, C. A test of reproductive power in snakes. Ecology 89, 1428-1435 (2008)	3323	409.76775	125	Ernst, C.H., 1979. Venomous Reptiles of North America. Smithsonian University Press, Washington, D.C.	5.11	ip	mammal	Mus_musculus	Russell 1967. Pharmacology of animal venoms. 8, 849-873	41	19	17	22	0	0	1	no	Vincent, S.E., Herrel, A. and Irschick, D.J., 2004. Sexual dimorphism in head shape and diet in the cottonmouth snake (Agkistrodon piscivorus). Journal of Zoology, 264(1), pp.53-59.	2160.806847	5
Agkistrodon_piscivorus	Viperidae	189	Boback, S. M. & Guyer, C. A test of reproductive power in snakes. Ecology 89, 1428-1435 (2008)	3323	409.76775	125	Ernst, C.H., 1979. Venomous Reptiles of North America. Smithsonian University Press, Washington, D.C.	4	iv	mammal	Mus_musculus	Russell 1967. Pharmacology of animal venoms. 8, 849-873	41	19	17	22	0	0	1	no	Vincent, S.E., Herrel, A. and Irschick, D.J., 2004. Sexual dimorphism in head shape and diet in the cottonmouth snake (Agkistrodon piscivorus). Journal of Zoology, 264(1), pp.53-59.	2160.806847	5
Agkistrodon_piscivorus	Viperidae	189	Boback, S. M. & Guyer, C. A test of reproductive power in snakes. Ecology 89, 1428-1435 (2008)	3323	409.76775	125	Ernst, C.H., 1979. Venomous Reptiles of North America. Smithsonian University Press, Washington, D.C.	4.844	ip	mammal	Mus_musculus	Kocholaty, W.F., Ledford, E.B., Daly, J.G. and Billings, T.A., 1971. Toxicity and some enzymatic properties and activities in the venoms of Crotalidae, Elapidae and Viperidae. Toxicon, 9(2), pp.131-138.	41	19	17	22	0	0	1	no	Vincent, S.E., Herrel, A. and Irschick, D.J., 2004. Sexual dimorphism in head shape and diet in the cottonmouth snake (Agkistrodon piscivorus). Journal of Zoology, 264(1), pp.53-59.	2160.806847	5
Agkistrodon_piscivorus	Viperidae	189	Boback, S. M. & Guyer, C. A test of reproductive power in snakes. Ecology 89, 1428-1435 (2008)	3323	409.76775	125	Ernst, C.H., 1979. Venomous Reptiles of North America. Smithsonian University Press, Washington, D.C.	2.044	iv	mammal	Mus_musculus	Kocholaty, W.F., Ledford, E.B., Daly, J.G. and Billings, T.A., 1971. Toxicity and some enzymatic properties and activities in the venoms of Crotalidae, Elapidae and Viperidae. Toxicon, 9(2), pp.131-138.	41	19	17	22	0	0	1	no	Vincent, S.E., Herrel, A. and Irschick, D.J., 2004. Sexual dimorphism in head shape and diet in the cottonmouth snake (Agkistrodon piscivorus). Journal of Zoology, 264(1), pp.53-59.	2160.806847	5
Agkistrodon_piscivorus	Viperidae	189	Boback, S. M. & Guyer, C. A test of reproductive power in snakes. Ecology 89, 1428-1435 (2008)	3323	409.76775	125	Ernst, C.H., 1979. Venomous Reptiles of North America. Smithsonian University Press, Washington, D.C.	6	ip	mammal	Mus_musculus	Powlick and Geren	41	19	17	22	0	0	1	no	Vincent, S.E., Herrel, A. and Irschick, D.J., 2004. Sexual dimorphism in head shape and diet in the cottonmouth snake (Agkistrodon piscivorus). Journal of Zoology, 264(1), pp.53-59.	2160.806847	5
Aipysurus_duboisii	Elapidae	120	Boback, S. M. & Guyer, C. A test of reproductive power in snakes. Ecology 89, 1428-1435 (2008)	391	419	0.43	Minton S.A. (1983) Lethal toxicity of venoms of snakes from the Coral Sea. Toxicon, Vol. 21, No. 6, pp 901-902.	0.044	sc	mammal	Mus_musculus	Minton 1983. Lethal Toxicity of venoms of snakes from the coral sea Toxicon 21:901	100	0	0	0	0	0	0	no	Voris, H.K. and Voris, H.H., 1983. Feeding strategies in marine snakes: an analysis of evolutionary, morphological, behavioral and ecological relationships. American Zoologist, 23(2), pp.411-425.	978.203748	4
Aipysurus_eydouxii	Elapidae	110	Boback, S. M. & Guyer, C. A test of reproductive power in snakes. Ecology 89, 1428-1435 (2008)	317	424.5	0.6	Gopalakrishnakone, P., Wollberg, M. and Kochva, E., 1994. The venom apparatus of sea snakes. Sea snake toxinology, pp.37-65.	4	iv	mammal	Mus_musculus	Mackessy, S.P. and Tu, A.T., 1993. Biology of the sea snakes and biochemistry of their venoms. Toxin-related Diseases: Poisons Originating from Plants, Animals and Spoilage. New Delhi: Oxford & IBH Publishing Co, pp.305-51.	0	4	0	0	0	94	0	yes	Allen, W.L., Baddeley, R., Scott-Samuel, N.E. and Cuthill, I.C., 2013. The evolution and function of pattern diversity in snakes. Behavioral Ecology, 24(5), pp.1237-1250..and.Godek	0	1
Aipysurus_eydouxii	Elapidae	110	Boback, S. M. & Guyer, C. A test of reproductive power in snakes. Ecology 89, 1428-1435 (2008)	317	424.5	0.6	Gopalakrishnakone, P., Wollberg, M. and Kochva, E., 1994. The venom apparatus of sea snakes. Sea snake toxinology, pp.37-65.	11.7	iv	mammal	Mus_musculus	Mackessy, S.P. and Tu, A.T., 1993. Biology of the sea snakes and biochemistry of their venoms. Toxin-related Diseases: Poisons Originating from Plants, Animals and Spoilage. New Delhi: Oxford & IBH Publishing Co, pp.305-51.	0	4	0	0	0	94	0	yes	Allen, W.L., Baddeley, R., Scott-Samuel, N.E. and Cuthill, I.C., 2013. The evolution and function of pattern diversity in snakes. Behavioral Ecology, 24(5), pp.1237-1250..and.Godek	0	1
Aipysurus_laevis	Elapidae	200	Boback, S. M. & Guyer, C. A test of reproductive power in snakes. Ecology 89, 1428-1435 (2008)	1338	195.6300122	10.5	Gopalakrishnakone, P., Wollberg, M. and Kochva, E., 1994. The venom apparatus of sea snakes. Sea snake toxinology, pp.37-65.	0.27	im	fish	Dascylhus_aruanus	Zimmerman, K. D., Harold Heatwole, and H. I. Davies. "Survival times and resistance to sea snake (Aipysurus laevis) venom by five species of prey fish." Toxicon 30.3 (1992): 259-264.	89	11	0	0	0	0	0	no	Voris, H.K. and Voris, H.H., 1983. Feeding strategies in marine snakes: an analysis of evolutionary, morphological, behavioral and ecological relationships. American Zoologist, 23(2), pp.411-425.	2602.453023	14
Aipysurus_laevis	Elapidae	200	Boback, S. M. & Guyer, C. A test of reproductive power in snakes. Ecology 89, 1428-1435 (2008)	1338	430.5475428	10.5	Gopalakrishnakone, P., Wollberg, M. and Kochva, E., 1994. The venom apparatus of sea snakes. Sea snake toxinology, pp.37-65.	0.084	sc	mammal	Mus_musculus	Minton 1983. Lethal Toxicity of venoms of snakes from the coral sea Toxicon 21:901	89	11	0	0	0	0	0	no	Voris, H.K. and Voris, H.H., 1983. Feeding strategies in marine snakes: an analysis of evolutionary, morphological, behavioral and ecological relationships. American Zoologist, 23(2), pp.411-425.	2602.453023	14
Aipysurus_laevis	Elapidae	200	Boback, S. M. & Guyer, C. A test of reproductive power in snakes. Ecology 89, 1428-1435 (2008)	1338	195.6300122	10.5	Gopalakrishnakone, P., Wollberg, M. and Kochva, E., 1994. The venom apparatus of sea snakes. Sea snake toxinology, pp.37-65.	0.09	im	fish	Chromis_atripectoralis	Zimmerman, K. D., Harold Heatwole, and H. I. Davies. "Survival times and resistance to sea snake (Aipysurus laevis) venom by five species of prey fish." Toxicon 30.3 (1992): 259-264.	89	11	0	0	0	0	0	no	Voris, H.K. and Voris, H.H., 1983. Feeding strategies in marine snakes: an analysis of evolutionary, morphological, behavioral and ecological relationships. American Zoologist, 23(2), pp.411-425.	2602.453023	14
Aipysurus_laevis	Elapidae	200	Boback, S. M. & Guyer, C. A test of reproductive power in snakes. Ecology 89, 1428-1435 (2008)	1338	195.4372412	10.5	Gopalakrishnakone, P., Wollberg, M. and Kochva, E., 1994. The venom apparatus of sea snakes. Sea snake toxinology, pp.37-65.	0.09	im	fish	Istiblennius_meleagris	Zimmerman, K. D., Harold Heatwole, and H. I. Davies. "Survival times and resistance to sea snake (Aipysurus laevis) venom by five species of prey fish." Toxicon 30.3 (1992): 259-264.	89	11	0	0	0	0	0	no	Voris, H.K. and Voris, H.H., 1983. Feeding strategies in marine snakes: an analysis of evolutionary, morphological, behavioral and ecological relationships. American Zoologist, 23(2), pp.411-425.	2602.453023	14
Aipysurus_laevis	Elapidae	200	Boback, S. M. & Guyer, C. A test of reproductive power in snakes. Ecology 89, 1428-1435 (2008)	1338	430.5475428	10.5	Gopalakrishnakone, P., Wollberg, M. and Kochva, E., 1994. The venom apparatus of sea snakes. Sea snake toxinology, pp.37-65.	0.17	iv	mammal	Mus_musculus	Mackessy, S.P. and Tu, A.T., 1993. Biology of the sea snakes and biochemistry of their venoms. Toxin-related Diseases: Poisons Originating from Plants, Animals and Spoilage. New Delhi: Oxford & IBH Publishing Co, pp.305-51.	89	11	0	0	0	0	0	no	Voris, H.K. and Voris, H.H., 1983. Feeding strategies in marine snakes: an analysis of evolutionary, morphological, behavioral and ecological relationships. American Zoologist, 23(2), pp.411-425.	2602.453023	14
Aipysurus_laevis	Elapidae	200	Boback, S. M. & Guyer, C. A test of reproductive power in snakes. Ecology 89, 1428-1435 (2008)	1338	195.6300122	10.5	Gopalakrishnakone, P., Wollberg, M. and Kochva, E., 1994. The venom apparatus of sea snakes. Sea snake toxinology, pp.37-65.	0.19	im	fish	Chromis_nitida	Zimmerman, K. D., Harold Heatwole, and H. I. Davies. "Survival times and resistance to sea snake (Aipysurus laevis) venom by five species of prey fish." Toxicon 30.3 (1992): 259-264.	89	11	0	0	0	0	0	no	Voris, H.K. and Voris, H.H., 1983. Feeding strategies in marine snakes: an analysis of evolutionary, morphological, behavioral and ecological relationships. American Zoologist, 23(2), pp.411-425.	2602.453023	14
Aipysurus_laevis	Elapidae	200	Boback, S. M. & Guyer, C. A test of reproductive power in snakes. Ecology 89, 1428-1435 (2008)	1338	195.4372412	10.5	Gopalakrishnakone, P., Wollberg, M. and Kochva, E., 1994. The venom apparatus of sea snakes. Sea snake toxinology, pp.37-65.	0.25	im	fish	Istiblennius_edentulus	Zimmerman, K. D., Harold Heatwole, and H. I. Davies. "Survival times and resistance to sea snake (Aipysurus laevis) venom by five species of prey fish." Toxicon 30.3 (1992): 259-264.	89	11	0	0	0	0	0	no	Voris, H.K. and Voris, H.H., 1983. Feeding strategies in marine snakes: an analysis of evolutionary, morphological, behavioral and ecological relationships. American Zoologist, 23(2), pp.411-425.	2602.453023	14
Aipysurus_laevis	Elapidae	200	Boback, S. M. & Guyer, C. A test of reproductive power in snakes. Ecology 89, 1428-1435 (2008)	1338	430.5475428	10.5	Gopalakrishnakone, P., Wollberg, M. and Kochva, E., 1994. The venom apparatus of sea snakes. Sea snake toxinology, pp.37-65.	0.28	sc	mammal	Mus_musculus	Baxter and Heather 1976.	89	11	0	0	0	0	0	no	Voris, H.K. and Voris, H.H., 1983. Feeding strategies in marine snakes: an analysis of evolutionary, morphological, behavioral and ecological relationships. American Zoologist, 23(2), pp.411-425.	2602.453023	14
Aipysurus_laevis	Elapidae	200	Boback, S. M. & Guyer, C. A test of reproductive power in snakes. Ecology 89, 1428-1435 (2008)	1338	430.5475428	10.5	Gopalakrishnakone, P., Wollberg, M. and Kochva, E., 1994. The venom apparatus of sea snakes. Sea snake toxinology, pp.37-65.	0.12	im	mammal	Mus_musculus	Maeda and Tamiya 1976	89	11	0	0	0	0	0	no	Voris, H.K. and Voris, H.H., 1983. Feeding strategies in marine snakes: an analysis of evolutionary, morphological, behavioral and ecological relationships. American Zoologist, 23(2), pp.411-425.	2602.453023	14
Aipysurus_laevis	Elapidae	200	Boback, S. M. & Guyer, C. A test of reproductive power in snakes. Ecology 89, 1428-1435 (2008)	1338	430.5475428	10.5	Gopalakrishnakone, P., Wollberg, M. and Kochva, E., 1994. The venom apparatus of sea snakes. Sea snake toxinology, pp.37-65.	0.5	im	mammal	Mus_musculus	Mackessy, S.P. and Tu, A.T., 1993. Biology of the sea snakes and biochemistry of their venoms. Toxin-related Diseases: Poisons Originating from Plants, Animals and Spoilage. New Delhi: Oxford & IBH Publishing Co, pp.305-51.	89	11	0	0	0	0	0	no	Voris, H.K. and Voris, H.H., 1983. Feeding strategies in marine snakes: an analysis of evolutionary, morphological, behavioral and ecological relationships. American Zoologist, 23(2), pp.411-425.	2602.453023	14
Aipysurus_laevis	Elapidae	200	Boback, S. M. & Guyer, C. A test of reproductive power in snakes. Ecology 89, 1428-1435 (2008)	1338	430.5475428	10.5	Gopalakrishnakone, P., Wollberg, M. and Kochva, E., 1994. The venom apparatus of sea snakes. Sea snake toxinology, pp.37-65.	0.13	im	mammal	Mus_musculus	Tamiya and Puffer 1974. Lethality of sea snake venoms. Toxicon 12 pp 85-87	89	11	0	0	0	0	0	no	Voris, H.K. and Voris, H.H., 1983. Feeding strategies in marine snakes: an analysis of evolutionary, morphological, behavioral and ecological relationships. American Zoologist, 23(2), pp.411-425.	2602.453023	14
Aipysurus_laevis	Elapidae	200	Boback, S. M. & Guyer, C. A test of reproductive power in snakes. Ecology 89, 1428-1435 (2008)	1338	190.7384459	10.5	Gopalakrishnakone, P., Wollberg, M. and Kochva, E., 1994. The venom apparatus of sea snakes. Sea snake toxinology, pp.37-65.	0.1	im	fish	Carassius_auratus	Tamiya and Puffer 1974. Lethality of sea snake venoms. Toxicon 12 pp 85-87	89	11	0	0	0	0	0	no	Voris, H.K. and Voris, H.H., 1983. Feeding strategies in marine snakes: an analysis of evolutionary, morphological, behavioral and ecological relationships. American Zoologist, 23(2), pp.411-425.	2602.453023	14
Alsophis_portoricensis	Dipsadidae	114	de Queiroz, A. & Rodr�guez_Robles, J. A. Historical contingency and animal diets: the origins of egg eating in snakes. The American Naturalist 167, 684-694 (2006).	179	352.016	5.9	Weinstein, S.A., Warrell, D.A., White, J. and Keyler, D.E., 2011. _Venomous Bites from Non-Venomous Snakes: A Critical Analysis of Risk and Management of _Colubrid Snake Bites. Elsevier.	2.1	ip	mammal	Mus_musculus	Weldon, C.L. and Mackessy, S.P., 2010. Biological and proteomic analysis of venom from the Puerto Rican Racer (Alsophis portoricensis: Dipsadidae). Toxicon, 55(2), pp.558-569.	0	0	8.7	89.3	0	0	0	no	Rodr�guez-Robles, J.A. and Leal, M., 1993. Effects of prey type on the feeding behavior of Alsophis portoricensis (Serpentes: Colubridae). Journal of Herpetology, pp.163-168.; Henderson, R.W. and Sajdak, R.A., 1996. Diets of West Indian racers (Colubridae: Alsophis): composition and biogeographic implications. Contributions to West Indian herpetology: a tribute to Albert Schwartz, pp.327-338.	0	1
Alsophis_portoricensis	Dipsadidae	114	de Queiroz, A. & Rodr�guez_Robles, J. A. Historical contingency and animal diets: the origins of egg eating in snakes. The American Naturalist 167, 684-694 (2006).	179	122.6432598	5.9	Weinstein, S.A., Warrell, D.A., White, J. and Keyler, D.E., 2011. _Venomous Bites from Non-Venomous Snakes: A Critical Analysis of Risk and Management of _Colubrid Snake Bites. Elsevier.	3.8	ip	lizard	Anolis_carolinensis	Weldon, C.L. and Mackessy, S.P., 2010. Biological and proteomic analysis of venom from the Puerto Rican Racer (Alsophis portoricensis: Dipsadidae). Toxicon, 55(2), pp.558-569.	0	0	8.7	89.3	0	0	0	no	Rodr�guez-Robles, J.A. and Leal, M., 1993. Effects of prey type on the feeding behavior of Alsophis portoricensis (Serpentes: Colubridae). Journal of Herpetology, pp.163-168.; Henderson, R.W. and Sajdak, R.A., 1996. Diets of West Indian racers (Colubridae: Alsophis): composition and biogeographic implications. Contributions to West Indian herpetology: a tribute to Albert Schwartz, pp.327-338.	0	1
Astrotia_stokesii	Elapidae	200	Boback, S. M. & Guyer, C. A test of reproductive power in snakes. Ecology 89, 1428-1435 (2008)	1338	419	31.3	Gopalakrishnakone, P., Wollberg, M. and Kochva, E., 1994. The venom apparatus of sea snakes. Sea snake toxinology, pp.37-65.	0.18	iv	mammal	Mus_musculus	Baxter and Heather 1976.	100	0	0	0	0	0	0	no	Voris, H.K. and Voris, H.H., 1983. Feeding strategies in marine snakes: an analysis of evolutionary, morphological, behavioral and ecological relationships. American Zoologist, 23(2), pp.411-425.	676.667468	2
Astrotia_stokesii	Elapidae	200	Boback, S. M. & Guyer, C. A test of reproductive power in snakes. Ecology 89, 1428-1435 (2008)	1338	419	31.3	Gopalakrishnakone, P., Wollberg, M. and Kochva, E., 1994. The venom apparatus of sea snakes. Sea snake toxinology, pp.37-65.	0.28	sc	mammal	Mus_musculus	Baxter and Heather 1976.	100	0	0	0	0	0	0	no	Voris, H.K. and Voris, H.H., 1983. Feeding strategies in marine snakes: an analysis of evolutionary, morphological, behavioral and ecological relationships. American Zoologist, 23(2), pp.411-425.	676.667468	2
Astrotia_stokesii	Elapidae	200	Boback, S. M. & Guyer, C. A test of reproductive power in snakes. Ecology 89, 1428-1435 (2008)	1338	419	31.3	Gopalakrishnakone, P., Wollberg, M. and Kochva, E., 1994. The venom apparatus of sea snakes. Sea snake toxinology, pp.37-65.	0.64	im	mammal	Mus_musculus	Tamiya and Puffer 1974. Lethality of sea snake venoms. Toxicon 12 pp 85-87	100	0	0	0	0	0	0	no	Voris, H.K. and Voris, H.H., 1983. Feeding strategies in marine snakes: an analysis of evolutionary, morphological, behavioral and ecological relationships. American Zoologist, 23(2), pp.411-425.	676.667468	2
Astrotia_stokesii	Elapidae	200	Boback, S. M. & Guyer, C. A test of reproductive power in snakes. Ecology 89, 1428-1435 (2008)	1338	229.9	31.3	Gopalakrishnakone, P., Wollberg, M. and Kochva, E., 1994. The venom apparatus of sea snakes. Sea snake toxinology, pp.37-65.	0.11	im	fish	Carassius_auratus	Gopalakrishnakone, P., Wollberg, M. and Kochva, E., 1994. The venom apparatus of sea snakes. Sea snake toxinology, pp.37-65.	100	0	0	0	0	0	0	no	Voris, H.K. and Voris, H.H., 1983. Feeding strategies in marine snakes: an analysis of evolutionary, morphological, behavioral and ecological relationships. American Zoologist, 23(2), pp.411-425.	676.667468	2
Atractaspis_bibronii	Lamprophiidae	63	Branch, W. R. Field guide to snakes and other reptiles of southern Africa. (Struik, 1998).	41	295.3077517	1	Warrell, D.A., 1985. Warrell, D.A., 1985. The burrowing asps genus Atractaspis, a tropical group of venomous snakes: Kochva, E., Wollberg, Z. and Golani, I.(Department of Zoology, Tel Aviv University, Israel). Toxicon, 23(4), p.623.: Kochva, E., Wollberg, Z. and Golani, I.(Department of Zoology, Tel Aviv University, Israel). Toxicon, 23(4), p.623.	1.3	iv	mammal	Mus_musculus	Warrell, D.A., 1985. Warrell, D.A., 1985. The burrowing asps genus Atractaspis, a tropical group of venomous snakes: Kochva, E., Wollberg, Z. and Golani, I.(Department of Zoology, Tel Aviv University, Israel). Toxicon, 23(4), p.623.: Kochva, E., Wollberg, Z. and Golani, I.(Department of Zoology, Tel Aviv University, Israel). Toxicon, 23(4), p.623.	0	0	2.8	75.2	0	1	21.9	yes	Shine, R., Branch, W.R., Harlow, P.S., Webb, J.K. and Shine, T., 2006. Biology of burrowing asps (Atractaspididae) from Southern Africa. Copeia, 2006(1), pp.103-115.	1951.575074	12
Atractaspis_microlepidota	Lamprophiidae	107	Boback, S. M. & Guyer, C. A test of reproductive power in snakes. Ecology 89, 1428-1435 (2008)	182	105.4499999	8	Warrell, D.A., 1985. Warrell, D.A., 1985. The burrowing asps genus Atractaspis, a tropical group of venomous snakes: Kochva, E., Wollberg, Z. and Golani, I.(Department of Zoology, Tel Aviv University, Israel). Toxicon, 23(4), p.623.: Kochva, E., Wollberg, Z. and Golani, I.(Department of Zoology, Tel Aviv University, Israel). Toxicon, 23(4), p.623.	1.3	iv	mammal	Mus_musculus	Warrell, D.A., 1985. Warrell, D.A., 1985. The burrowing asps genus Atractaspis, a tropical group of venomous snakes: Kochva, E., Wollberg, Z. and Golani, I.(Department of Zoology, Tel Aviv University, Israel). Toxicon, 23(4), p.623.: Kochva, E., Wollberg, Z. and Golani, I.(Department of Zoology, Tel Aviv University, Israel). Toxicon, 23(4), p.623.	0	0	0	100	0	0	0	no	Shine, R., Branch, W.R., Harlow, P.S., Webb, J.K. and Shine, T., 2006. Biology of burrowing asps (Atractaspididae) from Southern Africa. Copeia, 2006(1), pp.103-115.	0	1
Austrelaps_superbus	Elapidae	170	Boback, S. M. & Guyer, C. A test of reproductive power in snakes. Ecology 89, 1428-1435 (2008)	905	334.525352	22	Minton S.A. (1974) Venom Diseases. Ed. Thomas C.C., Springfield, Illinois.; Eds. J. Meier and J. White (1995) Handbook of Clinical Toxicology of Animal Venoms and Poisons. CRC Press, Boca Raton; Garnet J.R. (1970) Venomous Australian Animals Dangerous to Man. Commonwealth Serum Laboratories, Parkville, Victoria.	0.56	sc	mammal	Mus_musculus	Broad, A. J., Sutherland, S. K., Coulter, A.R. (1979). The lethality in mice of dangerous Australian and other snake venoms. Toxicon (17). 664-667. 11.	0	0	35	63	0	0	2	no	Shine, R., 1987. Ecological ramifications of prey size: food habits and reproductive biology of Australian copperhead snakes (Austrelaps, Elapidae). Journal of Herpetology, pp.21-28.	2154.73916	17
Bitis_gabonica	Viperidae	183	Boback, S. M. & Guyer, C. A test of reproductive power in snakes. Ecology 89, 1428-1435 (2008)	3025	88.40180931	537	Minton S.A. and Minton M.R. (1971) Venomous Reptiles. London : George Allen & Unwin Ltd; Phelps T. (1981) Poisonous Snakes. Poole : Blandford Press.; Broadley, D.G. and Cock, E.V., 1975. Snakes of Rhodesia. Longman Rhodesia.	0.64	iv	mammal	Mus_musculus	Christensen 1966	0	0	0.5	1	7.5	0	91	no	Luiselli, L. and Akani, G.C., 2003. Diet of sympatric Gaboon vipers (Bitis gabonica) and nose-horned vipers (Bitis nasicornis) in southern Nigeria: original article. African Journal of Herpetology, 52(2), pp.101-106.; Warner, J.K., 2009. Conservation biology of the gaboon adder (Bitis gabonica) in South Africa (Doctoral dissertation).	1825.372439	9
Bitis_gabonica	Viperidae	183	Boback, S. M. & Guyer, C. A test of reproductive power in snakes. Ecology 89, 1428-1435 (2008)	3025	88.40180931	537	Minton S.A. and Minton M.R. (1971) Venomous Reptiles. London : George Allen & Unwin Ltd; Phelps T. (1981) Poisonous Snakes. Poole : Blandford Press.; Broadley, D.G. and Cock, E.V., 1975. Snakes of Rhodesia. Longman Rhodesia.	0.55	iv	mammal	Mus_musculus	Minton 1976	0	0	0.5	1	7.5	0	91	no	Luiselli, L. and Akani, G.C., 2003. Diet of sympatric Gaboon vipers (Bitis gabonica) and nose-horned vipers (Bitis nasicornis) in southern Nigeria: original article. African Journal of Herpetology, 52(2), pp.101-106.; Warner, J.K., 2009. Conservation biology of the gaboon adder (Bitis gabonica) in South Africa (Doctoral dissertation).	1825.372439	9
Bitis_gabonica	Viperidae	183	Boback, S. M. & Guyer, C. A test of reproductive power in snakes. Ecology 89, 1428-1435 (2008)	3025	88.40180931	537	Minton S.A. and Minton M.R. (1971) Venomous Reptiles. London : George Allen & Unwin Ltd; Phelps T. (1981) Poisonous Snakes. Poole : Blandford Press.; Broadley, D.G. and Cock, E.V., 1975. Snakes of Rhodesia. Longman Rhodesia.	0.68	iv	mammal	Mus_musculus	Christensen 1979	0	0	0.5	1	7.5	0	91	no	Luiselli, L. and Akani, G.C., 2003. Diet of sympatric Gaboon vipers (Bitis gabonica) and nose-horned vipers (Bitis nasicornis) in southern Nigeria: original article. African Journal of Herpetology, 52(2), pp.101-106.; Warner, J.K., 2009. Conservation biology of the gaboon adder (Bitis gabonica) in South Africa (Doctoral dissertation).	1825.372439	9
Bitis_gabonica	Viperidae	183	Boback, S. M. & Guyer, C. A test of reproductive power in snakes. Ecology 89, 1428-1435 (2008)	3025	88.40180931	537	Minton S.A. and Minton M.R. (1971) Venomous Reptiles. London : George Allen & Unwin Ltd; Phelps T. (1981) Poisonous Snakes. Poole : Blandford Press.; Broadley, D.G. and Cock, E.V., 1975. Snakes of Rhodesia. Longman Rhodesia.	4.95	iv	mammal	Mus_musculus	Friederich and Tu 1971	0	0	0.5	1	7.5	0	91	no	Luiselli, L. and Akani, G.C., 2003. Diet of sympatric Gaboon vipers (Bitis gabonica) and nose-horned vipers (Bitis nasicornis) in southern Nigeria: original article. African Journal of Herpetology, 52(2), pp.101-106.; Warner, J.K., 2009. Conservation biology of the gaboon adder (Bitis gabonica) in South Africa (Doctoral dissertation).	1825.372439	9
Bitis_gabonica	Viperidae	183	Boback, S. M. & Guyer, C. A test of reproductive power in snakes. Ecology 89, 1428-1435 (2008)	3025	88.40180931	537	Minton S.A. and Minton M.R. (1971) Venomous Reptiles. London : George Allen & Unwin Ltd; Phelps T. (1981) Poisonous Snakes. Poole : Blandford Press.; Broadley, D.G. and Cock, E.V., 1975. Snakes of Rhodesia. Longman Rhodesia.	5.88	sc	mammal	Mus_musculus	Christensen 1979	0	0	0.5	1	7.5	0	91	no	Luiselli, L. and Akani, G.C., 2003. Diet of sympatric Gaboon vipers (Bitis gabonica) and nose-horned vipers (Bitis nasicornis) in southern Nigeria: original article. African Journal of Herpetology, 52(2), pp.101-106.; Warner, J.K., 2009. Conservation biology of the gaboon adder (Bitis gabonica) in South Africa (Doctoral dissertation).	1825.372439	9
Bitis_gabonica	Viperidae	183	Boback, S. M. & Guyer, C. A test of reproductive power in snakes. Ecology 89, 1428-1435 (2008)	3025	88.40180931	537	Minton S.A. and Minton M.R. (1971) Venomous Reptiles. London : George Allen & Unwin Ltd; Phelps T. (1981) Poisonous Snakes. Poole : Blandford Press.; Broadley, D.G. and Cock, E.V., 1975. Snakes of Rhodesia. Longman Rhodesia.	5.56	sc	mammal	Mus_musculus	Christensen 1979	0	0	0.5	1	7.5	0	91	no	Luiselli, L. and Akani, G.C., 2003. Diet of sympatric Gaboon vipers (Bitis gabonica) and nose-horned vipers (Bitis nasicornis) in southern Nigeria: original article. African Journal of Herpetology, 52(2), pp.101-106.; Warner, J.K., 2009. Conservation biology of the gaboon adder (Bitis gabonica) in South Africa (Doctoral dissertation).	1825.372439	9
Bitis_gabonica	Viperidae	183	Boback, S. M. & Guyer, C. A test of reproductive power in snakes. Ecology 89, 1428-1435 (2008)	3025	88.40180931	537	Minton S.A. and Minton M.R. (1971) Venomous Reptiles. London : George Allen & Unwin Ltd; Phelps T. (1981) Poisonous Snakes. Poole : Blandford Press.; Broadley, D.G. and Cock, E.V., 1975. Snakes of Rhodesia. Longman Rhodesia.	7	sc	mammal	Mus_musculus	Schottler 1951 On the Stability of Desiccated Snake Venoms	0	0	0.5	1	7.5	0	91	no	Luiselli, L. and Akani, G.C., 2003. Diet of sympatric Gaboon vipers (Bitis gabonica) and nose-horned vipers (Bitis nasicornis) in southern Nigeria: original article. African Journal of Herpetology, 52(2), pp.101-106.; Warner, J.K., 2009. Conservation biology of the gaboon adder (Bitis gabonica) in South Africa (Doctoral dissertation).	1825.372439	9
Bitis_gabonica	Viperidae	183	Boback, S. M. & Guyer, C. A test of reproductive power in snakes. Ecology 89, 1428-1435 (2008)	3025	88.40180931	537	Minton S.A. and Minton M.R. (1971) Venomous Reptiles. London : George Allen & Unwin Ltd; Phelps T. (1981) Poisonous Snakes. Poole : Blandford Press.; Broadley, D.G. and Cock, E.V., 1975. Snakes of Rhodesia. Longman Rhodesia.	1	ip	mammal	Mus_musculus	Mohamed et al 1973. Immunological studies on Egyptian cobra antivenin. Toxicon	0	0	0.5	1	7.5	0	91	no	Luiselli, L. and Akani, G.C., 2003. Diet of sympatric Gaboon vipers (Bitis gabonica) and nose-horned vipers (Bitis nasicornis) in southern Nigeria: original article. African Journal of Herpetology, 52(2), pp.101-106.; Warner, J.K., 2009. Conservation biology of the gaboon adder (Bitis gabonica) in South Africa (Doctoral dissertation).	1825.372439	9
Bitis_gabonica	Viperidae	183	Boback, S. M. & Guyer, C. A test of reproductive power in snakes. Ecology 89, 1428-1435 (2008)	3025	88.40180931	537	Minton S.A. and Minton M.R. (1971) Venomous Reptiles. London : George Allen & Unwin Ltd; Phelps T. (1981) Poisonous Snakes. Poole : Blandford Press.; Broadley, D.G. and Cock, E.V., 1975. Snakes of Rhodesia. Longman Rhodesia.	0.96	ip	mammal	Mus_musculus	Mohamed et al 1977. Immunological studies on polyvalent and monovalent snake antivenins. Toxicon	0	0	0.5	1	7.5	0	91	no	Luiselli, L. and Akani, G.C., 2003. Diet of sympatric Gaboon vipers (Bitis gabonica) and nose-horned vipers (Bitis nasicornis) in southern Nigeria: original article. African Journal of Herpetology, 52(2), pp.101-106.; Warner, J.K., 2009. Conservation biology of the gaboon adder (Bitis gabonica) in South Africa (Doctoral dissertation).	1825.372439	9
Bitis_gabonica	Viperidae	183	Boback, S. M. & Guyer, C. A test of reproductive power in snakes. Ecology 89, 1428-1435 (2008)	3025	88.40180931	537	Minton S.A. and Minton M.R. (1971) Venomous Reptiles. London : George Allen & Unwin Ltd; Phelps T. (1981) Poisonous Snakes. Poole : Blandford Press.; Broadley, D.G. and Cock, E.V., 1975. Snakes of Rhodesia. Longman Rhodesia.	0.96	ip	mammal	Mus_musculus	Mohamed et al 1977. Immunological studies on polyvalent and monovalent snake antivenins. Toxicon	0	0	0.5	1	7.5	0	91	no	Luiselli, L. and Akani, G.C., 2003. Diet of sympatric Gaboon vipers (Bitis gabonica) and nose-horned vipers (Bitis nasicornis) in southern Nigeria: original article. African Journal of Herpetology, 52(2), pp.101-106.; Warner, J.K., 2009. Conservation biology of the gaboon adder (Bitis gabonica) in South Africa (Doctoral dissertation).	1825.372439	9
Bitis_gabonica	Viperidae	183	Boback, S. M. & Guyer, C. A test of reproductive power in snakes. Ecology 89, 1428-1435 (2008)	3025	88.40180931	537	Minton S.A. and Minton M.R. (1971) Venomous Reptiles. London : George Allen & Unwin Ltd; Phelps T. (1981) Poisonous Snakes. Poole : Blandford Press.; Broadley, D.G. and Cock, E.V., 1975. Snakes of Rhodesia. Longman Rhodesia.	3.29	ip	mammal	Mus_musculus	Perez 1978. Resistance of warm blooded animals to snake venoms.	0	0	0.5	1	7.5	0	91	no	Luiselli, L. and Akani, G.C., 2003. Diet of sympatric Gaboon vipers (Bitis gabonica) and nose-horned vipers (Bitis nasicornis) in southern Nigeria: original article. African Journal of Herpetology, 52(2), pp.101-106.; Warner, J.K., 2009. Conservation biology of the gaboon adder (Bitis gabonica) in South Africa (Doctoral dissertation).	1825.372439	9
Bitis_gabonica	Viperidae	183	Boback, S. M. & Guyer, C. A test of reproductive power in snakes. Ecology 89, 1428-1435 (2008)	3025	88.40180931	537	Minton S.A. and Minton M.R. (1971) Venomous Reptiles. London : George Allen & Unwin Ltd; Phelps T. (1981) Poisonous Snakes. Poole : Blandford Press.; Broadley, D.G. and Cock, E.V., 1975. Snakes of Rhodesia. Longman Rhodesia.	2	ip	mammal	Mus_musculus	Brown JH. 1973. Toxicology and Pharmacology of Venoms from Poisonous Snakes. Springfield,	0	0	0.5	1	7.5	0	91	no	Luiselli, L. and Akani, G.C., 2003. Diet of sympatric Gaboon vipers (Bitis gabonica) and nose-horned vipers (Bitis nasicornis) in southern Nigeria: original article. African Journal of Herpetology, 52(2), pp.101-106.; Warner, J.K., 2009. Conservation biology of the gaboon adder (Bitis gabonica) in South Africa (Doctoral dissertation).	1825.372439	9
Bitis_gabonica	Viperidae	183	Boback, S. M. & Guyer, C. A test of reproductive power in snakes. Ecology 89, 1428-1435 (2008)	3025	88.40180931	537	Minton S.A. and Minton M.R. (1971) Venomous Reptiles. London : George Allen & Unwin Ltd; Phelps T. (1981) Poisonous Snakes. Poole : Blandford Press.; Broadley, D.G. and Cock, E.V., 1975. Snakes of Rhodesia. Longman Rhodesia.	1.955	ip	mammal	Mus_musculus	Kocholaty, W.F., Ledford, E.B., Daly, J.G. and Billings, T.A., 1971. Toxicity and some enzymatic properties and activities in the venoms of Crotalidae, Elapidae and Viperidae. Toxicon, 9(2), pp.131-138.	0	0	0.5	1	7.5	0	91	no	Luiselli, L. and Akani, G.C., 2003. Diet of sympatric Gaboon vipers (Bitis gabonica) and nose-horned vipers (Bitis nasicornis) in southern Nigeria: original article. African Journal of Herpetology, 52(2), pp.101-106.; Warner, J.K., 2009. Conservation biology of the gaboon adder (Bitis gabonica) in South Africa (Doctoral dissertation).	1825.372439	9
Bitis_gabonica	Viperidae	183	Boback, S. M. & Guyer, C. A test of reproductive power in snakes. Ecology 89, 1428-1435 (2008)	3025	88.40180931	537	Minton S.A. and Minton M.R. (1971) Venomous Reptiles. London : George Allen & Unwin Ltd; Phelps T. (1981) Poisonous Snakes. Poole : Blandford Press.; Broadley, D.G. and Cock, E.V., 1975. Snakes of Rhodesia. Longman Rhodesia.	0.6	ip	mammal	Mus_musculus	Mohamed et al 1974	0	0	0.5	1	7.5	0	91	no	Luiselli, L. and Akani, G.C., 2003. Diet of sympatric Gaboon vipers (Bitis gabonica) and nose-horned vipers (Bitis nasicornis) in southern Nigeria: original article. African Journal of Herpetology, 52(2), pp.101-106.; Warner, J.K., 2009. Conservation biology of the gaboon adder (Bitis gabonica) in South Africa (Doctoral dissertation).	1825.372439	9
Bitis_gabonica	Viperidae	183	Boback, S. M. & Guyer, C. A test of reproductive power in snakes. Ecology 89, 1428-1435 (2008)	3025	88.40180931	537	Minton S.A. and Minton M.R. (1971) Venomous Reptiles. London : George Allen & Unwin Ltd; Phelps T. (1981) Poisonous Snakes. Poole : Blandford Press.; Broadley, D.G. and Cock, E.V., 1975. Snakes of Rhodesia. Longman Rhodesia.	0.711	iv	mammal	Mus_musculus	Kocholaty, W.F., Ledford, E.B., Daly, J.G. and Billings, T.A., 1971. Toxicity and some enzymatic properties and activities in the venoms of Crotalidae, Elapidae and Viperidae. Toxicon, 9(2), pp.131-138.	0	0	0.5	1	7.5	0	91	no	Luiselli, L. and Akani, G.C., 2003. Diet of sympatric Gaboon vipers (Bitis gabonica) and nose-horned vipers (Bitis nasicornis) in southern Nigeria: original article. African Journal of Herpetology, 52(2), pp.101-106.; Warner, J.K., 2009. Conservation biology of the gaboon adder (Bitis gabonica) in South Africa (Doctoral dissertation).	1825.372439	9
Bitis_gabonica	Viperidae	183	Boback, S. M. & Guyer, C. A test of reproductive power in snakes. Ecology 89, 1428-1435 (2008)	3025	88.40180931	537	Minton S.A. and Minton M.R. (1971) Venomous Reptiles. London : George Allen & Unwin Ltd; Phelps T. (1981) Poisonous Snakes. Poole : Blandford Press.; Broadley, D.G. and Cock, E.V., 1975. Snakes of Rhodesia. Longman Rhodesia.	12.5	sc	mammal	Mus_musculus	Handbook of Natural Toxins: Reptile Venoms and Toxins	0	0	0.5	1	7.5	0	91	no	Luiselli, L. and Akani, G.C., 2003. Diet of sympatric Gaboon vipers (Bitis gabonica) and nose-horned vipers (Bitis nasicornis) in southern Nigeria: original article. African Journal of Herpetology, 52(2), pp.101-106.; Warner, J.K., 2009. Conservation biology of the gaboon adder (Bitis gabonica) in South Africa (Doctoral dissertation).	1825.372439	9
Bitis_gabonica	Viperidae	183	Boback, S. M. & Guyer, C. A test of reproductive power in snakes. Ecology 89, 1428-1435 (2008)	3025	88.40180931	537	Minton S.A. and Minton M.R. (1971) Venomous Reptiles. London : George Allen & Unwin Ltd; Phelps T. (1981) Poisonous Snakes. Poole : Blandford Press.; Broadley, D.G. and Cock, E.V., 1975. Snakes of Rhodesia. Longman Rhodesia.	0.55	iv	mammal	Mus_musculus	Minton 1976	0	0	0.5	1	7.5	0	91	no	Luiselli, L. and Akani, G.C., 2003. Diet of sympatric Gaboon vipers (Bitis gabonica) and nose-horned vipers (Bitis nasicornis) in southern Nigeria: original article. African Journal of Herpetology, 52(2), pp.101-106.; Warner, J.K., 2009. Conservation biology of the gaboon adder (Bitis gabonica) in South Africa (Doctoral dissertation).	1825.372439	9
Bitis_gabonica	Viperidae	183	Boback, S. M. & Guyer, C. A test of reproductive power in snakes. Ecology 89, 1428-1435 (2008)	3025	88.40180931	537	Minton S.A. and Minton M.R. (1971) Venomous Reptiles. London : George Allen & Unwin Ltd; Phelps T. (1981) Poisonous Snakes. Poole : Blandford Press.; Broadley, D.G. and Cock, E.V., 1975. Snakes of Rhodesia. Longman Rhodesia.	5.2	im	mammal	Mus_musculus	Tu, A.T., Homma, M. and Hong, B.S., 1969. Hemorrhagic, myonecrotic, thrombotic and proteolytic activities of viper venoms. Toxicon, 6(3), pp.175in7177-176in10178.	0	0	0.5	1	7.5	0	91	no	Luiselli, L. and Akani, G.C., 2003. Diet of sympatric Gaboon vipers (Bitis gabonica) and nose-horned vipers (Bitis nasicornis) in southern Nigeria: original article. African Journal of Herpetology, 52(2), pp.101-106.; Warner, J.K., 2009. Conservation biology of the gaboon adder (Bitis gabonica) in South Africa (Doctoral dissertation).	1825.372439	9
Bitis_nasicornis	Viperidae	123	Boback, S. M. & Guyer, C. A test of reproductive power in snakes. Ecology 89, 1428-1435 (2008)	952	139.1713576	138	Mirtschin, P.J., Dunstan, N., Hough, B., Hamilton, E., Klein, S., Lucas, J., Millar, D., Madaras, F. and Nias, T., 2006. Venom yields from Australian and some other species of snakes. Ecotoxicology, 15(6), pp.531-538.	1.06	iv	mammal	Mus_musculus	Calvete, J.J., Escolano, J. and Sanz, L., 2007. Snake venomics of Bitis species reveals large intragenus venom toxin composition variation: application to taxonomy of congeneric taxa.�Journal of proteome research,�6(7), pp.2732-2745.	0	0	23	0	0	0	77	no	Luiselli, L. and Akani, G.C., 2003. Diet of sympatric Gaboon vipers (Bitis gabonica) and nose-horned vipers (Bitis nasicornis) in southern Nigeria: original article. African Journal of Herpetology, 52(2), pp.101-106.; Warner, J.K., 2009. Conservation biology of the gaboon adder (Bitis gabonica) in South Africa (Doctoral dissertation).	1414.258526	7
Bitis_nasicornis	Viperidae	123	Boback, S. M. & Guyer, C. A test of reproductive power in snakes. Ecology 89, 1428-1435 (2008)	952	139.1713576	138	Mirtschin, P.J., Dunstan, N., Hough, B., Hamilton, E., Klein, S., Lucas, J., Millar, D., Madaras, F. and Nias, T., 2006. Venom yields from Australian and some other species of snakes. Ecotoxicology, 15(6), pp.531-538.	8.6	im	mammal	Mus_musculus	Tu, A.T., Homma, M. and Hong, B.S., 1969. Hemorrhagic, myonecrotic, thrombotic and proteolytic activities of viper venoms. Toxicon, 6(3), pp.175in7177-176in10178.	0	0	23	0	0	0	77	no	Luiselli, L. and Akani, G.C., 2003. Diet of sympatric Gaboon vipers (Bitis gabonica) and nose-horned vipers (Bitis nasicornis) in southern Nigeria: original article. African Journal of Herpetology, 52(2), pp.101-106.; Warner, J.K., 2009. Conservation biology of the gaboon adder (Bitis gabonica) in South Africa (Doctoral dissertation).	1414.258526	7
Boiga_dendrophila	Colubridae	250	Boback, S. M. & Guyer, C. A test of reproductive power in snakes. Ecology 89, 1428-1435 (2008)	1125	196.4057681	8	Weinstein, S.A. and Smith, L.A., 1993. Chromatographic profiles and properties of Duvernoy's secretions from some boigine and dispholidine colubrids. Herpetologica, pp.78-94.	4.85	iv	mammal	Mus_musculus	Weinstein, S.A., Warrell, D.A., White, J. and Keyler, D.E., 2011. _Venomous Bites from Non-Venomous Snakes: A Critical Analysis of Risk and Management of _Colubrid Snake Bites. Elsevier.	0	0	2	41.5	24.5	0	32	no	Greene, H.W., 1989. Ecological, evolutionary, and conservation implications of feeding biology in Old World cat snakes, genus Boiga (Colubriade). Proceedings of the California Academy of Sciences (USA).	2134.021392	12
Boiga_dendrophila	Colubridae	250	Boback, S. M. & Guyer, C. A test of reproductive power in snakes. Ecology 89, 1428-1435 (2008)	1125	196.4057681	8	Weinstein, S.A. and Smith, L.A., 1993. Chromatographic profiles and properties of Duvernoy's secretions from some boigine and dispholidine colubrids. Herpetologica, pp.78-94.	3.65	ip	mammal	Mus_musculus	Weinstein, S.A. and Smith, L.A., 1993. Chromatographic profiles and properties of Duvernoy's secretions from some boigine and dispholidine colubrids. Herpetologica, pp.78-94.	0	0	2	41.5	24.5	0	32	no	Greene, H.W., 1989. Ecological, evolutionary, and conservation implications of feeding biology in Old World cat snakes, genus Boiga (Colubriade). Proceedings of the California Academy of Sciences (USA).	2134.021392	12
Boiga_dendrophila	Colubridae	250	Boback, S. M. & Guyer, C. A test of reproductive power in snakes. Ecology 89, 1428-1435 (2008)	1125	196.4057681	1	Weinstein, S.A. and Smith, L.A., 1993. Chromatographic profiles and properties of Duvernoy's secretions from some boigine and dispholidine colubrids. Herpetologica, pp.78-94.	5.54	ip	mammal	Mus_musculus	Weinstein, S.A. and Smith, L.A., 1993. Chromatographic profiles and properties of Duvernoy's secretions from some boigine and dispholidine colubrids. Herpetologica, pp.78-94.	0	0	2	41.5	24.5	0	32	no	Greene, H.W., 1989. Ecological, evolutionary, and conservation implications of feeding biology in Old World cat snakes, genus Boiga (Colubriade). Proceedings of the California Academy of Sciences (USA).	2134.021392	12
Boiga_irregularis	Colubridae	230	Boback, S. M. & Guyer, C. A test of reproductive power in snakes. Ecology 89, 1428-1435 (2008)	926	247.2374602	10.2	Weinstein, S.A., Warrell, D.A., White, J. and Keyler, D.E., 2011. _Venomous Bites from Non-Venomous Snakes: A Critical Analysis of Risk and Management of _Colubrid Snake Bites. Elsevier.	1.75	ip	bird	Gallus_domesticus	Mackessy et al 2006. Venom of the Brown Treesnake Boiga irregularis Ontogentic shifts and taxa specific toxicity.Toxicon	0	4.62	1.54	42.53	12.48	24.04	14.79	yes	Greene, H.W., 1989. Ecological, evolutionary, and conservation implications of feeding biology in Old World cat snakes, genus Boiga (Colubriade). Proceedings of the California Academy of Sciences (USA).; Shine, R., 1991. Strangers in a strange land: ecology of the Australian colubrid snakes. Copeia, pp.120-131.; Savidge, J.A., 1988. Food habits of Boiga irregularis, an introduced predator on Guam…	3560.022106	21
Boiga_irregularis	Colubridae	230	Boback, S. M. & Guyer, C. A test of reproductive power in snakes. Ecology 89, 1428-1435 (2008)	926	229.8185957	10.2	Weinstein, S.A., Warrell, D.A., White, J. and Keyler, D.E., 2011. _Venomous Bites from Non-Venomous Snakes: A Critical Analysis of Risk and Management of _Colubrid Snake Bites. Elsevier.	2.5	ip	lizard	Hemidactylus_frenatus	Mackessy et al 2006. Venom of the Brown Treesnake Boiga irregularis Ontogentic shifts and taxa specific toxicity.Toxicon	0	4.62	1.54	42.53	12.48	24.04	14.79	yes	Greene, H.W., 1989. Ecological, evolutionary, and conservation implications of feeding biology in Old World cat snakes, genus Boiga (Colubriade). Proceedings of the California Academy of Sciences (USA).; Shine, R., 1991. Strangers in a strange land: ecology of the Australian colubrid snakes. Copeia, pp.120-131.; Savidge, J.A., 1988. Food habits of Boiga irregularis, an introduced predator on Guam…	3560.022106	21
Boiga_irregularis	Colubridae	230	Boback, S. M. & Guyer, C. A test of reproductive power in snakes. Ecology 89, 1428-1435 (2008)	926	225.5596316	10.2	Weinstein, S.A., Warrell, D.A., White, J. and Keyler, D.E., 2011. _Venomous Bites from Non-Venomous Snakes: A Critical Analysis of Risk and Management of _Colubrid Snake Bites. Elsevier.	4.75	ip	lizard	Carlia_ailanpalai	Mackessy et al 2006. Venom of the Brown Treesnake Boiga irregularis Ontogentic shifts and taxa specific toxicity.Toxicon	0	4.62	1.54	42.53	12.48	24.04	14.79	yes	Greene, H.W., 1989. Ecological, evolutionary, and conservation implications of feeding biology in Old World cat snakes, genus Boiga (Colubriade). Proceedings of the California Academy of Sciences (USA).; Shine, R., 1991. Strangers in a strange land: ecology of the Australian colubrid snakes. Copeia, pp.120-131.; Savidge, J.A., 1988. Food habits of Boiga irregularis, an introduced predator on Guam…	3560.022106	21
Boiga_irregularis	Colubridae	230	Boback, S. M. & Guyer, C. A test of reproductive power in snakes. Ecology 89, 1428-1435 (2008)	926	291.0168053	10.2	Weinstein, S.A., Warrell, D.A., White, J. and Keyler, D.E., 2011. _Venomous Bites from Non-Venomous Snakes: A Critical Analysis of Risk and Management of _Colubrid Snake Bites. Elsevier.	31	ip	mammal	Mus_musculus	Mackessy et al 2006. Venom of the Brown Treesnake Boiga irregularis Ontogentic shifts and taxa specific toxicity.Toxicon	0	4.62	1.54	42.53	12.48	24.04	14.79	yes	Greene, H.W., 1989. Ecological, evolutionary, and conservation implications of feeding biology in Old World cat snakes, genus Boiga (Colubriade). Proceedings of the California Academy of Sciences (USA).; Shine, R., 1991. Strangers in a strange land: ecology of the Australian colubrid snakes. Copeia, pp.120-131.; Savidge, J.A., 1988. Food habits of Boiga irregularis, an introduced predator on Guam…	3560.022106	21
Boiga_irregularis	Colubridae	230	Boback, S. M. & Guyer, C. A test of reproductive power in snakes. Ecology 89, 1428-1435 (2008)	926	291.0168053	6.888	Vest Mackessy and Kardone. 1991. The Unique Duvernoys secretion of the Brown Tree Snake,	80	iv	mammal	Mus_musculus	Vest Mackessy and Kardone. 1991. The Unique Duvernoys secretion of the Brown Tree Snake,	0	4.62	1.54	42.53	12.48	24.04	14.79	yes	Greene, H.W., 1989. Ecological, evolutionary, and conservation implications of feeding biology in Old World cat snakes, genus Boiga (Colubriade). Proceedings of the California Academy of Sciences (USA).; Shine, R., 1991. Strangers in a strange land: ecology of the Australian colubrid snakes. Copeia, pp.120-131.; Savidge, J.A., 1988. Food habits of Boiga irregularis, an introduced predator on Guam…	3560.022106	21
Bothriechis_schlegelii	Viperidae	80	Sorrell, G. 2009. Diel Movement and Predation Activity Patterns of the Eyelash Palm-Pitviper (Bothriechis schlegeli). Copeia, 1, 105-109.	211	304.1416684	15	Minton S.A. (1974) Venom Diseases. Ed. Thomas C.C., Springfield, Illinois.;Furtado M.F.D., Maruyama M., Kamiguti A.S. and Antonio L.C. (1991) Comparative Study of nine Bothrops snake venoms from adult female snakes and their offspring. Toxicon, Vol. 29, p 219. ; Sanchez E.F., Freitas T.V., Ferreira-Alves D.L., Velarde D.T., Diniz M.R., Cordeiro M.N., Agostini-Cotta G. and Diniz C.R. (1992) Biolog…	2.05	iv	mammal	Mus_musculus	Theakston, R.D.G. and Reid, H.A., 1983. Development of simple standard assay procedures for the characterization of snake venoms. Bulletin of the world health organization, 61(6), p.949.	0	0	36.5	45.5	9	0	9	no	Sorrell, G. 2009. Diel Movement and Predation Activity Patterns of the Eyelash Palm-Pitviper (Bothriechis schlegeli). Copeia, 1, 105-109.	2376.830751	14
Bothrops_alternatus	Viperidae	130	Boback, S. M. & Guyer, C. A test of reproductive power in snakes. Ecology 89, 1428-1435 (2008)	1118	158.175	88.25	Minton S.A. (1974) Venom Diseases. Ed. Thomas C.C., Springfield, Illinois.;Furtado M.F.D., Maruyama M., Kamiguti A.S. and Antonio L.C. (1991) Comparative Study of nine Bothrops snake venoms from adult female snakes and their offspring. Toxicon, Vol. 29, p 219. ; Sanchez E.F., Freitas T.V., Ferreira-Alves D.L., Velarde D.T., Diniz M.R., Cordeiro M.N., Agostini-Cotta G. and Diniz C.R. (1992) Biolog…	4.69	ip	mammal	Mus_musculus	Andrade, D.V. and Abe, A.S., 1999. Relationship of venom ontogeny and diet in Bothrops. Herpetologica, pp.200-204.	0	0	0	0	0	0	100	no	Martins, M.A.R.C.I.O., Marques, O.A. and Sazima, I.V.A.N., 2002. Ecological and phylogenetic correlates of feeding habits in Neotropical pitvipers of the genus Bothrops. Biology of the Vipers, pp.307-328.	0	1
Bothrops_alternatus	Viperidae	130	Boback, S. M. & Guyer, C. A test of reproductive power in snakes. Ecology 89, 1428-1435 (2008)	1118	359.2	88.25	Minton S.A. (1974) Venom Diseases. Ed. Thomas C.C., Springfield, Illinois.;Furtado M.F.D., Maruyama M., Kamiguti A.S. and Antonio L.C. (1991) Comparative Study of nine Bothrops snake venoms from adult female snakes and their offspring. Toxicon, Vol. 29, p 219. ; Sanchez E.F., Freitas T.V., Ferreira-Alves D.L., Velarde D.T., Diniz M.R., Cordeiro M.N., Agostini-Cotta G. and Diniz C.R. (1992) Biolog…	77.53	ip	amphibian	Rana_catesbeiana	Andrade, D.V. and Abe, A.S., 1999. Relationship of venom ontogeny and diet in Bothrops. Herpetologica, pp.200-204.	0	0	0	0	0	0	100	no	Martins, M.A.R.C.I.O., Marques, O.A. and Sazima, I.V.A.N., 2002. Ecological and phylogenetic correlates of feeding habits in Neotropical pitvipers of the genus Bothrops. Biology of the Vipers, pp.307-328.	0	1
Bothrops_alternatus	Viperidae	130	Boback, S. M. & Guyer, C. A test of reproductive power in snakes. Ecology 89, 1428-1435 (2008)	1118	158.175	88.25	Minton S.A. (1974) Venom Diseases. Ed. Thomas C.C., Springfield, Illinois.;Furtado M.F.D., Maruyama M., Kamiguti A.S. and Antonio L.C. (1991) Comparative Study of nine Bothrops snake venoms from adult female snakes and their offspring. Toxicon, Vol. 29, p 219. ; Sanchez E.F., Freitas T.V., Ferreira-Alves D.L., Velarde D.T., Diniz M.R., Cordeiro M.N., Agostini-Cotta G. and Diniz C.R. (1992) Biolog…	1.96	iv	mammal	Mus_musculus	Handbook of Natural Toxins: Reptile Venoms and Toxins	0	0	0	0	0	0	100	no	Martins, M.A.R.C.I.O., Marques, O.A. and Sazima, I.V.A.N., 2002. Ecological and phylogenetic correlates of feeding habits in Neotropical pitvipers of the genus Bothrops. Biology of the Vipers, pp.307-328.	0	1
Bothrops_alternatus	Viperidae	130	Boback, S. M. & Guyer, C. A test of reproductive power in snakes. Ecology 89, 1428-1435 (2008)	1118	158.175	88.25	Minton S.A. (1974) Venom Diseases. Ed. Thomas C.C., Springfield, Illinois.;Furtado M.F.D., Maruyama M., Kamiguti A.S. and Antonio L.C. (1991) Comparative Study of nine Bothrops snake venoms from adult female snakes and their offspring. Toxicon, Vol. 29, p 219. ; Sanchez E.F., Freitas T.V., Ferreira-Alves D.L., Velarde D.T., Diniz M.R., Cordeiro M.N., Agostini-Cotta G. and Diniz C.R. (1992) Biolog…	15.8	sc	mammal	Mus_musculus	Handbook of Natural Toxins: Reptile Venoms and Toxins	0	0	0	0	0	0	100	no	Martins, M.A.R.C.I.O., Marques, O.A. and Sazima, I.V.A.N., 2002. Ecological and phylogenetic correlates of feeding habits in Neotropical pitvipers of the genus Bothrops. Biology of the Vipers, pp.307-328.	0	1
Bothrops_ammodytoides	Viperidae	50	Boback, S. M. & Guyer, C. A test of reproductive power in snakes. Ecology 89, 1428-1435 (2008)	69	221.445	20.4	de Roodt, A.R., Dolab, J.A., Hajos, S.E., Gould, E., Din_poli, H., Troiano, J.C., Gould, J., Dokmetjian, J.C., Carfagnini, J.C., Fern_ndez, T. and Amoroso, M., 2000. Some toxic and enzymatic activities of Bothrops ammodytoides (yarar_ _ata) venom. Toxicon, 38(1), pp.49-61.	0.5	iv	mammal	Mus_musculus	de Roodt, A.R., Dolab, J.A., Hajos, S.E., Gould, E., Din_poli, H., Troiano, J.C., Gould, J., Dokmetjian, J.C., Carfagnini, J.C., Fern_ndez, T. and Amoroso, M., 2000. Some toxic and enzymatic activities of Bothrops ammodytoides (yarar_ _ata) venom. Toxicon, 38(1), pp.49-61.	0	0	0	40	0	0	60	no	Martins, M.A.R.C.I.O., Marques, O.A. and Sazima, I.V.A.N., 2002. Ecological and phylogenetic correlates of feeding habits in Neotropical pitvipers of the genus Bothrops. Biology of the Vipers, pp.307-328.	871.1068559	2
Bothrops_ammodytoides	Viperidae	50	Boback, S. M. & Guyer, C. A test of reproductive power in snakes. Ecology 89, 1428-1435 (2008)	69	221.445	20.4	de Roodt, A.R., Dolab, J.A., Hajos, S.E., Gould, E., Din_poli, H., Troiano, J.C., Gould, J., Dokmetjian, J.C., Carfagnini, J.C., Fern_ndez, T. and Amoroso, M., 2000. Some toxic and enzymatic activities of Bothrops ammodytoides (yarar_ _ata) venom. Toxicon, 38(1), pp.49-61.	2.86	ip	mammal	Mus_musculus	de Roodt, A.R., Dolab, J.A., Hajos, S.E., Gould, E., Din_poli, H., Troiano, J.C., Gould, J., Dokmetjian, J.C., Carfagnini, J.C., Fern_ndez, T. and Amoroso, M., 2000. Some toxic and enzymatic activities of Bothrops ammodytoides (yarar_ _ata) venom. Toxicon, 38(1), pp.49-61.	0	0	0	40	0	0	60	no	Martins, M.A.R.C.I.O., Marques, O.A. and Sazima, I.V.A.N., 2002. Ecological and phylogenetic correlates of feeding habits in Neotropical pitvipers of the genus Bothrops. Biology of the Vipers, pp.307-328.	871.1068559	2
Bothrops_asper	Viperidae	250	O'Shea, M. Venomous snakes of the world. (New Holland Publishers, 2008).	7499	230.09065	458	Warrell DA. 2004. Snakebites in Central and South America: Epidemiology, Clinical Features, and Clinical Management. In Campbell JA, Lamar WW. 2004. The Venomous Reptiles of the Western Hemisphere. Comstock Publishing Associates, Ithaca and London. 870 pp. 1500 plates	1.175	iv	mammal	Mus_musculus	Zug, George R. (1996). Snakes in Question: The Smithsonian Answer Book. Washington D.C., USA: Smithsonian Institution Scholarly Press. ISBN 1-56098-648-4.	0	0	18.7	18.7	3.1	0	59.4	no	Martins, M.A.R.C.I.O., Marques, O.A. and Sazima, I.V.A.N., 2002. Ecological and phylogenetic correlates of feeding habits in Neotropical pitvipers of the genus Bothrops. Biology of the Vipers, pp.307-328.	1502.006976	4
Bothrops_asper	Viperidae	250	O'Shea, M. Venomous snakes of the world. (New Holland Publishers, 2008).	7499	230.09065	458	Warrell DA. 2004. Snakebites in Central and South America: Epidemiology, Clinical Features, and Clinical Management. In Campbell JA, Lamar WW. 2004. The Venomous Reptiles of the Western Hemisphere. Comstock Publishing Associates, Ithaca and London. 870 pp. 1500 plates	3.1	sc	mammal	Mus_musculus	Zug, George R. (1996). Snakes in Question: The Smithsonian Answer Book. Washington D.C., USA: Smithsonian Institution Scholarly Press. ISBN 1-56098-648-4.	0	0	18.7	18.7	3.1	0	59.4	no	Martins, M.A.R.C.I.O., Marques, O.A. and Sazima, I.V.A.N., 2002. Ecological and phylogenetic correlates of feeding habits in Neotropical pitvipers of the genus Bothrops. Biology of the Vipers, pp.307-328.	1502.006976	4
Bothrops_atrox	Viperidae	139	Boback, S. M. & Guyer, C. A test of reproductive power in snakes. Ecology 89, 1428-1435 (2008)	1359	261.552275	153	U.S. Department of the Navy (1968) Poisonous Snakes of the World. United States Government Printing Office, Washington. D.C.; Minton S.A. (1974) Venom Diseases. Ed. Thomas C.C., Springfield, Illinois.	5.6	iv	mammal	Mus_musculus	Boechat, A.L.R., Paiva, C.S., Fran�a, F.O. and Dos-Santos, M.C., 2001. Heparin-antivenom association: differential neutralization effectiveness in Bothrops atrox and Bothrops erythromelas envenoming. Revista do Instituto de Medicina Tropical de S_o Paulo, 43(1), pp.07-14.	0	1.7	33.5	16.3	2.6	0	45.5	no	Martins, M.A.R.C.I.O., Marques, O.A. and Sazima, I.V.A.N., 2002. Ecological and phylogenetic correlates of feeding habits in Neotropical pitvipers of the genus Bothrops. Biology of the Vipers, pp.307-328.	2013.506976	5
Bothrops_atrox	Viperidae	139	Boback, S. M. & Guyer, C. A test of reproductive power in snakes. Ecology 89, 1428-1435 (2008)	1359	261.552275	153	U.S. Department of the Navy (1968) Poisonous Snakes of the World. United States Government Printing Office, Washington. D.C.; Minton S.A. (1974) Venom Diseases. Ed. Thomas C.C., Springfield, Illinois.	5.41	iv	mammal	Mus_musculus	Consroe, P., Gerrish, K., Egen, N., Russell, F.E., 1992. Intravenous dose lethality of American pit viper venoms in mice using standardized	0	1.7	33.5	16.3	2.6	0	45.5	no	Martins, M.A.R.C.I.O., Marques, O.A. and Sazima, I.V.A.N., 2002. Ecological and phylogenetic correlates of feeding habits in Neotropical pitvipers of the genus Bothrops. Biology of the Vipers, pp.307-328.	2013.506976	5
Bothrops_atrox	Viperidae	139	Boback, S. M. & Guyer, C. A test of reproductive power in snakes. Ecology 89, 1428-1435 (2008)	1359	261.552275	153	U.S. Department of the Navy (1968) Poisonous Snakes of the World. United States Government Printing Office, Washington. D.C.; Minton S.A. (1974) Venom Diseases. Ed. Thomas C.C., Springfield, Illinois.	4.63	iv	mammal	Mus_musculus	Minton, S and Minton, M.R. (1969). Venomous Reptiles. Scribners New York	0	1.7	33.5	16.3	2.6	0	45.5	no	Martins, M.A.R.C.I.O., Marques, O.A. and Sazima, I.V.A.N., 2002. Ecological and phylogenetic correlates of feeding habits in Neotropical pitvipers of the genus Bothrops. Biology of the Vipers, pp.307-328.	2013.506976	5
Bothrops_atrox	Viperidae	139	Boback, S. M. & Guyer, C. A test of reproductive power in snakes. Ecology 89, 1428-1435 (2008)	1359	261.552275	153	U.S. Department of the Navy (1968) Poisonous Snakes of the World. United States Government Printing Office, Washington. D.C.; Minton S.A. (1974) Venom Diseases. Ed. Thomas C.C., Springfield, Illinois.	22	sc	mammal	Mus_musculus	Minton, S and Minton, M.R. (1969). Venomous Reptiles. Scribners New York	0	1.7	33.5	16.3	2.6	0	45.5	no	Martins, M.A.R.C.I.O., Marques, O.A. and Sazima, I.V.A.N., 2002. Ecological and phylogenetic correlates of feeding habits in Neotropical pitvipers of the genus Bothrops. Biology of the Vipers, pp.307-328.	2013.506976	5
Bothrops_atrox	Viperidae	139	Boback, S. M. & Guyer, C. A test of reproductive power in snakes. Ecology 89, 1428-1435 (2008)	1359	261.552275	153	U.S. Department of the Navy (1968) Poisonous Snakes of the World. United States Government Printing Office, Washington. D.C.; Minton S.A. (1974) Venom Diseases. Ed. Thomas C.C., Springfield, Illinois.	1.4	iv	mammal	Mus_musculus	Tu and Homma	0	1.7	33.5	16.3	2.6	0	45.5	no	Martins, M.A.R.C.I.O., Marques, O.A. and Sazima, I.V.A.N., 2002. Ecological and phylogenetic correlates of feeding habits in Neotropical pitvipers of the genus Bothrops. Biology of the Vipers, pp.307-328.	2013.506976	5
Bothrops_atrox	Viperidae	139	Boback, S. M. & Guyer, C. A test of reproductive power in snakes. Ecology 89, 1428-1435 (2008)	1359	261.552275	153	U.S. Department of the Navy (1968) Poisonous Snakes of the World. United States Government Printing Office, Washington. D.C.; Minton S.A. (1974) Venom Diseases. Ed. Thomas C.C., Springfield, Illinois.	4.27	iv	mammal	Mus_musculus	U.S. Department of the Navy (1968) Poisonous Snakes of the World. United States Government Printing Office, Washington. D.C.; Minton S.A. (1974) Venom Diseases. Ed. Thomas C.C., Springfield, Illinois.	0	1.7	33.5	16.3	2.6	0	45.5	no	Martins, M.A.R.C.I.O., Marques, O.A. and Sazima, I.V.A.N., 2002. Ecological and phylogenetic correlates of feeding habits in Neotropical pitvipers of the genus Bothrops. Biology of the Vipers, pp.307-328.	2013.506976	5
Bothrops_atrox	Viperidae	139	Boback, S. M. & Guyer, C. A test of reproductive power in snakes. Ecology 89, 1428-1435 (2008)	1359	261.552275	153	U.S. Department of the Navy (1968) Poisonous Snakes of the World. United States Government Printing Office, Washington. D.C.; Minton S.A. (1974) Venom Diseases. Ed. Thomas C.C., Springfield, Illinois.	3.8	ip	mammal	Mus_musculus	U.S. Department of the Navy (1968) Poisonous Snakes of the World. United States Government Printing Office, Washington. D.C.; Minton S.A. (1974) Venom Diseases. Ed. Thomas C.C., Springfield, Illinois.	0	1.7	33.5	16.3	2.6	0	45.5	no	Martins, M.A.R.C.I.O., Marques, O.A. and Sazima, I.V.A.N., 2002. Ecological and phylogenetic correlates of feeding habits in Neotropical pitvipers of the genus Bothrops. Biology of the Vipers, pp.307-328.	2013.506976	5
Bothrops_atrox	Viperidae	139	Boback, S. M. & Guyer, C. A test of reproductive power in snakes. Ecology 89, 1428-1435 (2008)	1359	261.552275	153	U.S. Department of the Navy (1968) Poisonous Snakes of the World. United States Government Printing Office, Washington. D.C.; Minton S.A. (1974) Venom Diseases. Ed. Thomas C.C., Springfield, Illinois.	3.71	iv	mammal	Mus_musculus	Meier and Theakston 1986	0	1.7	33.5	16.3	2.6	0	45.5	no	Martins, M.A.R.C.I.O., Marques, O.A. and Sazima, I.V.A.N., 2002. Ecological and phylogenetic correlates of feeding habits in Neotropical pitvipers of the genus Bothrops. Biology of the Vipers, pp.307-328.	2013.506976	5
Bothrops_atrox	Viperidae	139	Boback, S. M. & Guyer, C. A test of reproductive power in snakes. Ecology 89, 1428-1435 (2008)	1359	261.552275	153	U.S. Department of the Navy (1968) Poisonous Snakes of the World. United States Government Printing Office, Washington. D.C.; Minton S.A. (1974) Venom Diseases. Ed. Thomas C.C., Springfield, Illinois.	3.95	iv	mammal	Mus_musculus	Meier and Theakston 1986	0	1.7	33.5	16.3	2.6	0	45.5	no	Martins, M.A.R.C.I.O., Marques, O.A. and Sazima, I.V.A.N., 2002. Ecological and phylogenetic correlates of feeding habits in Neotropical pitvipers of the genus Bothrops. Biology of the Vipers, pp.307-328.	2013.506976	5
Bothrops_atrox	Viperidae	139	Boback, S. M. & Guyer, C. A test of reproductive power in snakes. Ecology 89, 1428-1435 (2008)	1359	261.552275	153	U.S. Department of the Navy (1968) Poisonous Snakes of the World. United States Government Printing Office, Washington. D.C.; Minton S.A. (1974) Venom Diseases. Ed. Thomas C.C., Springfield, Illinois.	2.844	ip	mammal	Mus_musculus	Kocholaty, W.F., Ledford, E.B., Daly, J.G. and Billings, T.A., 1971. Toxicity and some enzymatic properties and activities in the venoms of Crotalidae, Elapidae and Viperidae. Toxicon, 9(2), pp.131-138.	0	1.7	33.5	16.3	2.6	0	45.5	no	Martins, M.A.R.C.I.O., Marques, O.A. and Sazima, I.V.A.N., 2002. Ecological and phylogenetic correlates of feeding habits in Neotropical pitvipers of the genus Bothrops. Biology of the Vipers, pp.307-328.	2013.506976	5
Bothrops_atrox	Viperidae	139	Boback, S. M. & Guyer, C. A test of reproductive power in snakes. Ecology 89, 1428-1435 (2008)	1359	261.552275	153	U.S. Department of the Navy (1968) Poisonous Snakes of the World. United States Government Printing Office, Washington. D.C.; Minton S.A. (1974) Venom Diseases. Ed. Thomas C.C., Springfield, Illinois.	1.244	iv	mammal	Mus_musculus	Kocholaty, W.F., Ledford, E.B., Daly, J.G. and Billings, T.A., 1971. Toxicity and some enzymatic properties and activities in the venoms of Crotalidae, Elapidae and Viperidae. Toxicon, 9(2), pp.131-138.	0	1.7	33.5	16.3	2.6	0	45.5	no	Martins, M.A.R.C.I.O., Marques, O.A. and Sazima, I.V.A.N., 2002. Ecological and phylogenetic correlates of feeding habits in Neotropical pitvipers of the genus Bothrops. Biology of the Vipers, pp.307-328.	2013.506976	5
Bothrops_erythromelas	Viperidae	54	Boback, S. M. & Guyer, C. A test of reproductive power in snakes. Ecology 89, 1428-1435 (2008)	87	360.97985	39	Sanchez E.F., Freitas T.V., Ferreira-Alves D.L., Velarde D.T., Diniz M.R., Cordeiro M.N., Agostini-Cotta G. and Diniz C.R. (1992) Biological activities of venoms from South American Snakes. Toxicon, Vol. 30, p 95.	3	iv	mammal	Mus_musculus	Boechat, A.L.R., Paiva, C.S., Fran�a, F.O. and Dos-Santos, M.C., 2001. Heparin-antivenom association: differential neutralization effectiveness in Bothrops atrox and Bothrops erythromelas envenoming. Revista do Instituto de Medicina Tropical de S_o Paulo, 43(1), pp.07-14.	0	23.1	30.8	30.8	0	0	15.4	no	Martins, M.A.R.C.I.O., Marques, O.A. and Sazima, I.V.A.N., 2002. Ecological and phylogenetic correlates of feeding habits in Neotropical pitvipers of the genus Bothrops. Biology of the Vipers, pp.307-328.	1741.806852	4
Bothrops_jararaca	Viperidae	180	Navy, U. Poisonous snakes of the world. US Govt New York: Dover Publications Inc, 203-206 (1991).	2883	317.687175	68	Sanchez E.F., Freitas T.V., Ferreira-Alves D.L., Velarde D.T., Diniz M.R., Cordeiro M.N., Agostini-Cotta G. and Diniz C.R. (1992) Biological activities of venoms from South American Snakes. Toxicon, Vol. 30, p 95.; Minton S.A. (1974) Venom Diseases. Ed. Thomas C.C., Springfield, Illinois.; De Roodt A.R., Dolab J.A., Gallarce P.P., Gould E., Litwin S., Dokmetjian, J.C., Segre L. and Vidal J.C. (19…	1.36	im	bird	Gallus_domesticus	Zelanis, A., Tashima, A.K., Rocha, M.M., Furtado, M.F., Camargo, A.C., Ho, P.L. and Serrano, S.M., 2010. Analysis of the ontogenetic variation in the venom proteome/peptidome of Bothrops jararaca reveals different strategies to deal with prey. Journal of proteome research, 9(5), pp.2278-2291.	0	2.2	17.8	2.2	6.7	0	71.1	no	Martins, M.A.R.C.I.O., Marques, O.A. and Sazima, I.V.A.N., 2002. Ecological and phylogenetic correlates of feeding habits in Neotropical pitvipers of the genus Bothrops. Biology of the Vipers, pp.307-328.	2013.506976	5
Bothrops_jararaca	Viperidae	180	Navy, U. Poisonous snakes of the world. US Govt New York: Dover Publications Inc, 203-206 (1991).	2883	216.798175	68	Sanchez E.F., Freitas T.V., Ferreira-Alves D.L., Velarde D.T., Diniz M.R., Cordeiro M.N., Agostini-Cotta G. and Diniz C.R. (1992) Biological activities of venoms from South American Snakes. Toxicon, Vol. 30, p 95.; Minton S.A. (1974) Venom Diseases. Ed. Thomas C.C., Springfield, Illinois.; De Roodt A.R., Dolab J.A., Gallarce P.P., Gould E., Litwin S., Dokmetjian, J.C., Segre L. and Vidal J.C. (19…	1.74	ip	mammal	Mus_musculus	Andrade, D.V. and Abe, A.S., 1999. Relationship of venom ontogeny and diet in Bothrops. Herpetologica, pp.200-204.	0	2.2	17.8	2.2	6.7	0	71.1	no	Martins, M.A.R.C.I.O., Marques, O.A. and Sazima, I.V.A.N., 2002. Ecological and phylogenetic correlates of feeding habits in Neotropical pitvipers of the genus Bothrops. Biology of the Vipers, pp.307-328.	2013.506976	5
Bothrops_jararaca	Viperidae	180	Navy, U. Poisonous snakes of the world. US Govt New York: Dover Publications Inc, 203-206 (1991).	2883	216.798175	68	Sanchez E.F., Freitas T.V., Ferreira-Alves D.L., Velarde D.T., Diniz M.R., Cordeiro M.N., Agostini-Cotta G. and Diniz C.R. (1992) Biological activities of venoms from South American Snakes. Toxicon, Vol. 30, p 95.; Minton S.A. (1974) Venom Diseases. Ed. Thomas C.C., Springfield, Illinois.; De Roodt A.R., Dolab J.A., Gallarce P.P., Gould E., Litwin S., Dokmetjian, J.C., Segre L. and Vidal J.C. (19…	2.26	ip	mammal	Mus_musculus	Zelanis, A., Tashima, A.K., Rocha, M.M., Furtado, M.F., Camargo, A.C., Ho, P.L. and Serrano, S.M., 2010. Analysis of the ontogenetic variation in the venom proteome/peptidome of Bothrops jararaca reveals different strategies to deal with prey. Journal of proteome research, 9(5), pp.2278-2291.; Andrade, D.V. and Abe, A.S., 1999. Relationship of venom ontogeny and diet in Bothrops. Herpetologica, p…	0	2.2	17.8	2.2	6.7	0	71.1	no	Martins, M.A.R.C.I.O., Marques, O.A. and Sazima, I.V.A.N., 2002. Ecological and phylogenetic correlates of feeding habits in Neotropical pitvipers of the genus Bothrops. Biology of the Vipers, pp.307-328.	2013.506976	5
Bothrops_jararaca	Viperidae	180	Navy, U. Poisonous snakes of the world. US Govt New York: Dover Publications Inc, 203-206 (1991).	2883	357.097	68	Sanchez E.F., Freitas T.V., Ferreira-Alves D.L., Velarde D.T., Diniz M.R., Cordeiro M.N., Agostini-Cotta G. and Diniz C.R. (1992) Biological activities of venoms from South American Snakes. Toxicon, Vol. 30, p 95.; Minton S.A. (1974) Venom Diseases. Ed. Thomas C.C., Springfield, Illinois.; De Roodt A.R., Dolab J.A., Gallarce P.P., Gould E., Litwin S., Dokmetjian, J.C., Segre L. and Vidal J.C. (19…	91.44	ip	amphibian	Rana_catesbeiana	Andrade, D.V. and Abe, A.S., 1999. Relationship of venom ontogeny and diet in Bothrops. Herpetologica, pp.200-204.	0	2.2	17.8	2.2	6.7	0	71.1	no	Martins, M.A.R.C.I.O., Marques, O.A. and Sazima, I.V.A.N., 2002. Ecological and phylogenetic correlates of feeding habits in Neotropical pitvipers of the genus Bothrops. Biology of the Vipers, pp.307-328.	2013.506976	5
Bothrops_jararaca	Viperidae	180	Navy, U. Poisonous snakes of the world. US Govt New York: Dover Publications Inc, 203-206 (1991).	2883	216.798175	68	Sanchez E.F., Freitas T.V., Ferreira-Alves D.L., Velarde D.T., Diniz M.R., Cordeiro M.N., Agostini-Cotta G. and Diniz C.R. (1992) Biological activities of venoms from South American Snakes. Toxicon, Vol. 30, p 95.; Minton S.A. (1974) Venom Diseases. Ed. Thomas C.C., Springfield, Illinois.; De Roodt A.R., Dolab J.A., Gallarce P.P., Gould E., Litwin S., Dokmetjian, J.C., Segre L. and Vidal J.C. (19…	1.1	iv	mammal	Mus_musculus	Handbook of Natural Toxins: Reptile Venoms and Toxins	0	2.2	17.8	2.2	6.7	0	71.1	no	Martins, M.A.R.C.I.O., Marques, O.A. and Sazima, I.V.A.N., 2002. Ecological and phylogenetic correlates of feeding habits in Neotropical pitvipers of the genus Bothrops. Biology of the Vipers, pp.307-328.	2013.506976	5
Bothrops_jararaca	Viperidae	180	Navy, U. Poisonous snakes of the world. US Govt New York: Dover Publications Inc, 203-206 (1991).	2883	216.798175	68	Sanchez E.F., Freitas T.V., Ferreira-Alves D.L., Velarde D.T., Diniz M.R., Cordeiro M.N., Agostini-Cotta G. and Diniz C.R. (1992) Biological activities of venoms from South American Snakes. Toxicon, Vol. 30, p 95.; Minton S.A. (1974) Venom Diseases. Ed. Thomas C.C., Springfield, Illinois.; De Roodt A.R., Dolab J.A., Gallarce P.P., Gould E., Litwin S., Dokmetjian, J.C., Segre L. and Vidal J.C. (19…	7	sc	mammal	Mus_musculus	Handbook of Natural Toxins: Reptile Venoms and Toxins	0	2.2	17.8	2.2	6.7	0	71.1	no	Martins, M.A.R.C.I.O., Marques, O.A. and Sazima, I.V.A.N., 2002. Ecological and phylogenetic correlates of feeding habits in Neotropical pitvipers of the genus Bothrops. Biology of the Vipers, pp.307-328.	2013.506976	5
Bothrops_jararacussu	Viperidae	220	Milani, et al. 1997. Snake bites by the jararacu�u (Bothrops jararacussu): clinicopathological studies of 29 proven cases in S_o Paulo State, Brazil. Qjm 90.5: 323-334.	5170	215.782625	193	Sanchez E.F., Freitas T.V., Ferreira-Alves D.L., Velarde D.T., Diniz M.R., Cordeiro M.N., Agostini-Cotta G. and Diniz C.R. (1992) Biological activities of venoms from South American Snakes. Toxicon, Vol. 30, p 95.; Minton S.A. (1974) Venom Diseases. Ed. Thomas C.C., Springfield, Illinois.; De Roodt A.R., Dolab J.A., Gallarce P.P., Gould E., Litwin S., Dokmetjian, J.C., Segre L. and Vidal J.C. (19…	5.7	ip	mammal	Mus_musculus	Guimar_es, C.L.S., Andri_o-Escarso, S.H., Moreira-Dill, L.S., Carvalho, B.M.A., Marchi-Salvador, D.P., Santos-Filho, N.A., Fernandes, C.A.H., Fontes, M.R.M., Giglio, J.R., Barraviera, B. and Zuliani, J.P., 2014. Alkylation of Histidine Residues of Bothrops jararacussu Venom Proteins and Isolated Phospholipases: A Biotechnological Tool to Improve the Production of Antibodies. BioMed research inter…	0	1.5	16.4	11.9	0	0	70.1	no	Martins, M.A.R.C.I.O., Marques, O.A. and Sazima, I.V.A.N., 2002. Ecological and phylogenetic correlates of feeding habits in Neotropical pitvipers of the genus Bothrops. Biology of the Vipers, pp.307-328.	1741.806852	4
Bothrops_jararacussu	Viperidae	220	Milani, et al. 1997. Snake bites by the jararacu�u (Bothrops jararacussu): clinicopathological studies of 29 proven cases in S_o Paulo State, Brazil. Qjm 90.5: 323-334.	5170	215.782625	193	Sanchez E.F., Freitas T.V., Ferreira-Alves D.L., Velarde D.T., Diniz M.R., Cordeiro M.N., Agostini-Cotta G. and Diniz C.R. (1992) Biological activities of venoms from South American Snakes. Toxicon, Vol. 30, p 95.; Minton S.A. (1974) Venom Diseases. Ed. Thomas C.C., Springfield, Illinois.; De Roodt A.R., Dolab J.A., Gallarce P.P., Gould E., Litwin S., Dokmetjian, J.C., Segre L. and Vidal J.C. (19…	0.46	iv	mammal	Mus_musculus	Handbook of Natural Toxins: Reptile Venoms and Toxins	0	1.5	16.4	11.9	0	0	70.1	no	Martins, M.A.R.C.I.O., Marques, O.A. and Sazima, I.V.A.N., 2002. Ecological and phylogenetic correlates of feeding habits in Neotropical pitvipers of the genus Bothrops. Biology of the Vipers, pp.307-328.	1741.806852	4
Bothrops_jararacussu	Viperidae	220	Milani, et al. 1997. Snake bites by the jararacu�u (Bothrops jararacussu): clinicopathological studies of 29 proven cases in S_o Paulo State, Brazil. Qjm 90.5: 323-334.	5170	215.782625	193	Sanchez E.F., Freitas T.V., Ferreira-Alves D.L., Velarde D.T., Diniz M.R., Cordeiro M.N., Agostini-Cotta G. and Diniz C.R. (1992) Biological activities of venoms from South American Snakes. Toxicon, Vol. 30, p 95.; Minton S.A. (1974) Venom Diseases. Ed. Thomas C.C., Springfield, Illinois.; De Roodt A.R., Dolab J.A., Gallarce P.P., Gould E., Litwin S., Dokmetjian, J.C., Segre L. and Vidal J.C. (19…	13	sc	mammal	Mus_musculus	Handbook of Natural Toxins: Reptile Venoms and Toxins	0	1.5	16.4	11.9	0	0	70.1	no	Martins, M.A.R.C.I.O., Marques, O.A. and Sazima, I.V.A.N., 2002. Ecological and phylogenetic correlates of feeding habits in Neotropical pitvipers of the genus Bothrops. Biology of the Vipers, pp.307-328.	1741.806852	4
Bothrops_leucurus	Viperidae	184.4	Lira-da-Silva, Rej_ne Maria. "Bothrops leucurus Wagler, 1824 (Serpentes; Viperidae): natural history, venom and envenomation." Gazeta M_dica da Bahia 79, no. 1 (2009).	3093	232.6241	182	Sanchez E.F., Freitas T.V., Ferreira-Alves D.L., Velarde D.T., Diniz M.R., Cordeiro M.N., Agostini-Cotta G. and Diniz C.R. (1992) Biological activities of venoms from South American Snakes. Toxicon, Vol. 30, p 95.	0.915	iv	mammal	Mus_musculus	Sanchez E.F., Freitas T.V., Ferreira-Alves D.L., Velarde D.T., Diniz M.R., Cordeiro M.N., Agostini-Cotta G. and Diniz C.R. (1992) Biological activities of venoms from South American Snakes. Toxicon, Vol. 30, p 95.	0	0	12.8	28.2	2.6	0	56.4	no	Martins, M.A.R.C.I.O., Marques, O.A. and Sazima, I.V.A.N., 2002. Ecological and phylogenetic correlates of feeding habits in Neotropical pitvipers of the genus Bothrops. Biology of the Vipers, pp.307-328.	1502.006976	4
Bothrops_leucurus	Viperidae	184.4	Lira-da-Silva, Rej_ne Maria. 2009. Bothrops leucurus Wagler, 1824 (Serpentes; Viperidae): natural history, venom and envenomation. Gazeta M_dica da Bahia 79, no. 1.	3093	232.6241	182	Sanchez E.F., Freitas T.V., Ferreira-Alves D.L., Velarde D.T., Diniz M.R., Cordeiro M.N., Agostini-Cotta G. and Diniz C.R. (1992) Biological activities of venoms from South American Snakes. Toxicon, Vol. 30, p 95.	4.28	ip	mammal	Mus_musculus	Sanchez E.F., Freitas T.V., Ferreira-Alves D.L., Velarde D.T., Diniz M.R., Cordeiro M.N., Agostini-Cotta G. and Diniz C.R. (1992) Biological activities of venoms from South American Snakes. Toxicon, Vol. 30, p 95.	0	0	12.8	28.2	2.6	0	56.4	no	Martins, M.A.R.C.I.O., Marques, O.A. and Sazima, I.V.A.N., 2002. Ecological and phylogenetic correlates of feeding habits in Neotropical pitvipers of the genus Bothrops. Biology of the Vipers, pp.307-328.	1502.006976	4
Bothrops_moojeni	Viperidae	230	Navy, U. Poisonous snakes of the world. US Govt New York: Dover Publications Inc, 203-206 (1991).	5883	266.317275	183	Sanchez E.F., Freitas T.V., Ferreira-Alves D.L., Velarde D.T., Diniz M.R., Cordeiro M.N., Agostini-Cotta G. and Diniz C.R. (1992) Biological activities of venoms from South American Snakes. Toxicon, Vol. 30, p 95.; De Roodt A.R., Dolab J.A., Gallarce P.P., Gould E., Litwin S., Dokmetjian, J.C., Segre L. and Vidal J.C. (1998) A study on the venom yield of venomous snake species from Argentina. Tox…	4.7	ip	mammal	Mus_musculus	da Silva, N.J. and Aird, S.D., 2001. Prey specificity, comparative lethality and compositional differences of coral snake venoms. Comparative Biochemistry and Physiology Part C: Toxicology & Pharmacology, 128(3), pp.425-456.	0	0.9	33.6	20.6	2.8	0	42.1	no	Martins, M.A.R.C.I.O., Marques, O.A. and Sazima, I.V.A.N., 2002. Ecological and phylogenetic correlates of feeding habits in Neotropical pitvipers of the genus Bothrops. Biology of the Vipers, pp.307-328.	2013.506976	5
Bothrops_moojeni	Viperidae	230	Navy, U. Poisonous snakes of the world. US Govt New York: Dover Publications Inc, 203-206 (1991).	5883	299.0831	183	Sanchez E.F., Freitas T.V., Ferreira-Alves D.L., Velarde D.T., Diniz M.R., Cordeiro M.N., Agostini-Cotta G. and Diniz C.R. (1992) Biological activities of venoms from South American Snakes. Toxicon, Vol. 30, p 95.; De Roodt A.R., Dolab J.A., Gallarce P.P., Gould E., Litwin S., Dokmetjian, J.C., Segre L. and Vidal J.C. (1998) A study on the venom yield of venomous snake species from Argentina. Tox…	11.8	ip	lizard	Amphisbaena_cunhai	da Silva, N.J. and Aird, S.D., 2001. Prey specificity, comparative lethality and compositional differences of coral snake venoms. Comparative Biochemistry and Physiology Part C: Toxicology & Pharmacology, 128(3), pp.425-456.	0	0.9	33.6	20.6	2.8	0	42.1	no	Martins, M.A.R.C.I.O., Marques, O.A. and Sazima, I.V.A.N., 2002. Ecological and phylogenetic correlates of feeding habits in Neotropical pitvipers of the genus Bothrops. Biology of the Vipers, pp.307-328.	2013.506976	5
Bothrops_moojeni	Viperidae	230	Navy, U. Poisonous snakes of the world. US Govt New York: Dover Publications Inc, 203-206 (1991).	5883	299.0831	183	Sanchez E.F., Freitas T.V., Ferreira-Alves D.L., Velarde D.T., Diniz M.R., Cordeiro M.N., Agostini-Cotta G. and Diniz C.R. (1992) Biological activities of venoms from South American Snakes. Toxicon, Vol. 30, p 95.; De Roodt A.R., Dolab J.A., Gallarce P.P., Gould E., Litwin S., Dokmetjian, J.C., Segre L. and Vidal J.C. (1998) A study on the venom yield of venomous snake species from Argentina. Tox…	13.4	im	lizard	Liophis_typhlus	da Silva, N.J. and Aird, S.D., 2001. Prey specificity, comparative lethality and compositional differences of coral snake venoms. Comparative Biochemistry and Physiology Part C: Toxicology & Pharmacology, 128(3), pp.425-456.	0	0.9	33.6	20.6	2.8	0	42.1	no	Martins, M.A.R.C.I.O., Marques, O.A. and Sazima, I.V.A.N., 2002. Ecological and phylogenetic correlates of feeding habits in Neotropical pitvipers of the genus Bothrops. Biology of the Vipers, pp.307-328.	2013.506976	5
Bungarus_multicinctus	Elapidae	185	Navy, U. Poisonous snakes of the world. US Govt New York: Dover Publications Inc, 203-206 (1991).	1109	383.0666663	7.8	Gopalakrishnakone, P. and Chou, L.M., 1990. Snakes of medical importance (Asia-Pacific region). National University of Singapore; Sawai Y. (1976) Medical treatment of snakebites. 2. Southeast Asia. The Snake, Vol. 8(1), pp 1-30.	0.00031	im	bird	Lonchura_striata	Lee, C.Y. and Tseng, L.F., 1969. Species differences in susceptibility to elapid venoms. Toxicon, 7(2), pp.89-93.	76	0	0	24	0	0	0	no	Mao, S.H., 1970. Food of the common venomous snakes of Taiwan. Herpetologica, pp.45-48.	1372.400751	5
Bungarus_multicinctus	Elapidae	185	Navy, U. Poisonous snakes of the world. US Govt New York: Dover Publications Inc, 203-206 (1991).	1109	383.0666663	7.8	Gopalakrishnakone, P. and Chou, L.M., 1990. Snakes of medical importance (Asia-Pacific region). National University of Singapore; Sawai Y. (1976) Medical treatment of snakebites. 2. Southeast Asia. The Snake, Vol. 8(1), pp 1-30.	0.00078	im	bird	Columba_sp	Lee, C.Y. and Tseng, L.F., 1969. Species differences in susceptibility to elapid venoms. Toxicon, 7(2), pp.89-93.	76	0	0	24	0	0	0	no	Mao, S.H., 1970. Food of the common venomous snakes of Taiwan. Herpetologica, pp.45-48.	1372.400751	5
Bungarus_multicinctus	Elapidae	185	Navy, U. Poisonous snakes of the world. US Govt New York: Dover Publications Inc, 203-206 (1991).	1109	383.0666663	7.8	Gopalakrishnakone, P. and Chou, L.M., 1990. Snakes of medical importance (Asia-Pacific region). National University of Singapore; Sawai Y. (1976) Medical treatment of snakebites. 2. Southeast Asia. The Snake, Vol. 8(1), pp 1-30.	0.00095	im	bird	Gallus_domesticus	Lee, C.Y. and Tseng, L.F., 1969. Species differences in susceptibility to elapid venoms. Toxicon, 7(2), pp.89-93.	76	0	0	24	0	0	0	no	Mao, S.H., 1970. Food of the common venomous snakes of Taiwan. Herpetologica, pp.45-48.	1372.400751	5
Bungarus_multicinctus	Elapidae	185	Navy, U. Poisonous snakes of the world. US Govt New York: Dover Publications Inc, 203-206 (1991).	1109	393.9077774	7.8	Gopalakrishnakone, P. and Chou, L.M., 1990. Snakes of medical importance (Asia-Pacific region). National University of Singapore; Sawai Y. (1976) Medical treatment of snakebites. 2. Southeast Asia. The Snake, Vol. 8(1), pp 1-30.	0.16	im	mammal	Mus_musculus	Lee, C.Y. and Tseng, L.F., 1969. Species differences in susceptibility to elapid venoms. Toxicon, 7(2), pp.89-93.	76	0	0	24	0	0	0	no	Mao, S.H., 1970. Food of the common venomous snakes of Taiwan. Herpetologica, pp.45-48.	1372.400751	5
Bungarus_multicinctus	Elapidae	185	Navy, U. Poisonous snakes of the world. US Govt New York: Dover Publications Inc, 203-206 (1991).	1109	393.9077774	7.8	Gopalakrishnakone, P. and Chou, L.M., 1990. Snakes of medical importance (Asia-Pacific region). National University of Singapore; Sawai Y. (1976) Medical treatment of snakebites. 2. Southeast Asia. The Snake, Vol. 8(1), pp 1-30.	0.019	ip	mammal	Mus_musculus	Crosland, R.D., 1988. Effect of chloroquine on toxicity in mice of the venom and neurotoxins from the snake Bungarus multicinctus. Journal of Pharmacology and Experimental Therapeutics, 246(3), pp.992-995.	76	0	0	24	0	0	0	no	Mao, S.H., 1970. Food of the common venomous snakes of Taiwan. Herpetologica, pp.45-48.	1372.400751	5
Bungarus_multicinctus	Elapidae	185	Navy, U. Poisonous snakes of the world. US Govt New York: Dover Publications Inc, 203-206 (1991).	1109	393.9077774	7.8	Gopalakrishnakone, P. and Chou, L.M., 1990. Snakes of medical importance (Asia-Pacific region). National University of Singapore; Sawai Y. (1976) Medical treatment of snakebites. 2. Southeast Asia. The Snake, Vol. 8(1), pp 1-30.	0.16	im	mammal	Mus_musculus	lee, C.Y. and Tseng, L.F., 1969. Species differences in susceptibility to elapid venoms. Toxicon, 7(2), pp.89-93.	76	0	0	24	0	0	0	no	Mao, S.H., 1970. Food of the common venomous snakes of Taiwan. Herpetologica, pp.45-48.	1372.400751	5
Bungarus_multicinctus	Elapidae	185	Navy, U. Poisonous snakes of the world. US Govt New York: Dover Publications Inc, 203-206 (1991).	1109	393.9077774	7.8	Gopalakrishnakone, P. and Chou, L.M., 1990. Snakes of medical importance (Asia-Pacific region). National University of Singapore; Sawai Y. (1976) Medical treatment of snakebites. 2. Southeast Asia. The Snake, Vol. 8(1), pp 1-30.	0.071	iv	mammal	Mus_musculus	Kocholaty, W.F., Ledford, E.B., Daly, J.G. and Billings, T.A., 1971. Toxicity and some enzymatic properties and activities in the venoms of Crotalidae, Elapidae and Viperidae. Toxicon, 9(2), pp.131-138.	76	0	0	24	0	0	0	no	Mao, S.H., 1970. Food of the common venomous snakes of Taiwan. Herpetologica, pp.45-48.	1372.400751	5
Bungarus_multicinctus	Elapidae	185	Navy, U. Poisonous snakes of the world. US Govt New York: Dover Publications Inc, 203-206 (1991).	1109	393.9077774	7.8	Gopalakrishnakone, P. and Chou, L.M., 1990. Snakes of medical importance (Asia-Pacific region). National University of Singapore; Sawai Y. (1976) Medical treatment of snakebites. 2. Southeast Asia. The Snake, Vol. 8(1), pp 1-30.	0.08	ip	mammal	Mus_musculus	Kocholaty, W.F., Ledford, E.B., Daly, J.G. and Billings, T.A., 1971. Toxicity and some enzymatic properties and activities in the venoms of Crotalidae, Elapidae and Viperidae. Toxicon, 9(2), pp.131-138.	76	0	0	24	0	0	0	no	Mao, S.H., 1970. Food of the common venomous snakes of Taiwan. Herpetologica, pp.45-48.	1372.400751	5
Bungarus_multicinctus	Elapidae	185	Navy, U. Poisonous snakes of the world. US Govt New York: Dover Publications Inc, 203-206 (1991).	1109	393.9077774	7.8	Gopalakrishnakone, P. and Chou, L.M., 1990. Snakes of medical importance (Asia-Pacific region). National University of Singapore; Sawai Y. (1976) Medical treatment of snakebites. 2. Southeast Asia. The Snake, Vol. 8(1), pp 1-30.	0.2	ip	mammal	Mus_musculus	Kabara and Fischer 1972	76	0	0	24	0	0	0	no	Mao, S.H., 1970. Food of the common venomous snakes of Taiwan. Herpetologica, pp.45-48.	1372.400751	5
Bungarus_multicinctus	Elapidae	185	Navy, U. Poisonous snakes of the world. US Govt New York: Dover Publications Inc, 203-206 (1991).	1109	393.9077774	7.8	Gopalakrishnakone, P. and Chou, L.M., 1990. Snakes of medical importance (Asia-Pacific region). National University of Singapore; Sawai Y. (1976) Medical treatment of snakebites. 2. Southeast Asia. The Snake, Vol. 8(1), pp 1-30.	0.2	iv	mammal	Oryctolagus_cuniculus	Change 1979.	76	0	0	24	0	0	0	no	Mao, S.H., 1970. Food of the common venomous snakes of Taiwan. Herpetologica, pp.45-48.	1372.400751	5
Bungarus_multicinctus	Elapidae	185	Navy, U. Poisonous snakes of the world. US Govt New York: Dover Publications Inc, 203-206 (1991).	1109	393.9077774	7.8	Gopalakrishnakone, P. and Chou, L.M., 1990. Snakes of medical importance (Asia-Pacific region). National University of Singapore; Sawai Y. (1976) Medical treatment of snakebites. 2. Southeast Asia. The Snake, Vol. 8(1), pp 1-30.	0.19	sc	mammal	Mus_musculus	Minton, SA (1967). Paraspecific protection by elapid and sea snake antivenins. Toxicon 5 (1): 47_55. doi:10.1016/0041-0101(67)90118-3.	76	0	0	24	0	0	0	no	Mao, S.H., 1970. Food of the common venomous snakes of Taiwan. Herpetologica, pp.45-48.	1372.400751	5
Bungarus_multicinctus	Elapidae	185	Navy, U. Poisonous snakes of the world. US Govt New York: Dover Publications Inc, 203-206 (1991).	1109	393.9077774	7.8	Gopalakrishnakone, P. and Chou, L.M., 1990. Snakes of medical importance (Asia-Pacific region). National University of Singapore; Sawai Y. (1976) Medical treatment of snakebites. 2. Southeast Asia. The Snake, Vol. 8(1), pp 1-30.	0.005	sc	mammal	Cavia_porcellus	Handbook of Natural Toxins: Reptile Venoms and Toxins	76	0	0	24	0	0	0	no	Mao, S.H., 1970. Food of the common venomous snakes of Taiwan. Herpetologica, pp.45-48.	1372.400751	5
Causus_rhombeatus	Viperidae	93	Boback, S. M. & Guyer, C. A test of reproductive power in snakes. Ecology 89, 1428-1435 (2008)	422	556.5	25	Minton S.A. (1974) Venom Diseases. Ed. Thomas C.C., Springfield, Illinois.	8.75	iv	mammal	Mus_musculus	Spawls, S., Branch, B. & Branch, W. R. The dangerous snakes of Africa: natural history, species directory, venoms, and snakebite. (Ralph Curtis Pub, 1995).	0	100	0	0	0	0	0	no	Ineich, I., Bonnet, X., Shine, R., Shine, T., Brischoux, F., Lebreton, M. and Chirio, L., 2006. What, if anything, is a _typical�viper? Biological attributes of basal viperid snakes (genus Causus Wagler, 1830). Biological Journal of the Linnean Society, 89(4), pp.575-588.	0	1
Cerastes_cerastes	Viperidae	85	Spawls, S., Branch, B. & Branch, W. R. The dangerous snakes of Africa: natural history, species directory, venoms, and snakebite. (Ralph Curtis Pub, 1995).	325	236.0129175	51	Minton S.A. (1974) Venom Diseases. Ed. Thomas C.C., Springfield, Illinois.; Kochva E. (1978) Oral Glands of the Reptilia. In : Biology of the Reptilia.VIII. Eds. Gans C. and Gans K.A., Academic Press, London and New York. Abdel_Aal, A. and Abdel-Baset, A., 2010. Venom yield and toxicities of six Egyptian snakes with a description of a procedure for estimating the amount of venom ejected by a sing…	0.5	iv	mammal	Mus_musculus	Spawls, S., Branch, B. & Branch, W. R. The dangerous snakes of Africa: natural history, species directory, venoms, and snakebite. (Ralph Curtis Pub, 1995).	0	0	0	47.62	1.59	0	50.79	no	Webber, M.M., X. Glaudas, J.A. Rodriguez-Robles. 2012. Do sidewinding rattlesnakes (Crotalus cerastes, Viperidae) cease feeding during the breeding season? Copeia 2012: 100-105.	1142.806978	3
Cerastes_cerastes	Viperidae	85	Spawls, S., Branch, B. & Branch, W. R. The dangerous snakes of Africa: natural history, species directory, venoms, and snakebite. (Ralph Curtis Pub, 1995).	325	236.0129175	51	Minton S.A. (1974) Venom Diseases. Ed. Thomas C.C., Springfield, Illinois.; Kochva E. (1978) Oral Glands of the Reptilia. In : Biology of the Reptilia.VIII. Eds. Gans C. and Gans K.A., Academic Press, London and New York. Abdel_Aal, A. and Abdel-Baset, A., 2010. Venom yield and toxicities of six Egyptian snakes with a description of a procedure for estimating the amount of venom ejected by a sing…	0.95	ip	mammal	Mus_musculus	Abdel_Aal, A. and Abdel-Baset, A., 2010. Venom yield and toxicities of six Egyptian snakes with a description of a procedure for estimating the amount of venom ejected by a single snake bite. Scientific Journal of King Faisal University (Basic and Applied Sciences), 11(1), p.1431.	0	0	0	47.62	1.59	0	50.79	no	Webber, M.M., X. Glaudas, J.A. Rodriguez-Robles. 2012. Do sidewinding rattlesnakes (Crotalus cerastes, Viperidae) cease feeding during the breeding season? Copeia 2012: 100-105.	1142.806978	3
Cerastes_cerastes	Viperidae	85	Spawls, S., Branch, B. & Branch, W. R. The dangerous snakes of Africa: natural history, species directory, venoms, and snakebite. (Ralph Curtis Pub, 1995).	325	236.0129175	51	Minton S.A. (1974) Venom Diseases. Ed. Thomas C.C., Springfield, Illinois.; Kochva E. (1978) Oral Glands of the Reptilia. In : Biology of the Reptilia.VIII. Eds. Gans C. and Gans K.A., Academic Press, London and New York. Abdel_Aal, A. and Abdel-Baset, A., 2010. Venom yield and toxicities of six Egyptian snakes with a description of a procedure for estimating the amount of venom ejected by a sing…	1.35	ip	mammal	Mus_musculus	Abdel_Aal, A. and Abdel-Baset, A., 2010. Venom yield and toxicities of six Egyptian snakes with a description of a procedure for estimating the amount of venom ejected by a single snake bite. Scientific Journal of King Faisal University (Basic and Applied Sciences), 11(1), p.1431.	0	0	0	47.62	1.59	0	50.79	no	Webber, M.M., X. Glaudas, J.A. Rodriguez-Robles. 2012. Do sidewinding rattlesnakes (Crotalus cerastes, Viperidae) cease feeding during the breeding season? Copeia 2012: 100-105.	1142.806978	3
Cerastes_cerastes	Viperidae	85	Spawls, S., Branch, B. & Branch, W. R. The dangerous snakes of Africa: natural history, species directory, venoms, and snakebite. (Ralph Curtis Pub, 1995).	325	236.0129175	51	Minton S.A. (1974) Venom Diseases. Ed. Thomas C.C., Springfield, Illinois.; Kochva E. (1978) Oral Glands of the Reptilia. In : Biology of the Reptilia.VIII. Eds. Gans C. and Gans K.A., Academic Press, London and New York. Abdel_Aal, A. and Abdel-Baset, A., 2010. Venom yield and toxicities of six Egyptian snakes with a description of a procedure for estimating the amount of venom ejected by a sing…	0.296	ip	mammal	Mus_musculus	Mohamed et al 1973. Immunological studies on Egyptian cobra antivenin. Toxicon	0	0	0	47.62	1.59	0	50.79	no	Webber, M.M., X. Glaudas, J.A. Rodriguez-Robles. 2012. Do sidewinding rattlesnakes (Crotalus cerastes, Viperidae) cease feeding during the breeding season? Copeia 2012: 100-105.	1142.806978	3
Cerastes_cerastes	Viperidae	85	Spawls, S., Branch, B. & Branch, W. R. The dangerous snakes of Africa: natural history, species directory, venoms, and snakebite. (Ralph Curtis Pub, 1995).	325	236.0129175	51	Minton S.A. (1974) Venom Diseases. Ed. Thomas C.C., Springfield, Illinois.; Kochva E. (1978) Oral Glands of the Reptilia. In : Biology of the Reptilia.VIII. Eds. Gans C. and Gans K.A., Academic Press, London and New York. Abdel_Aal, A. and Abdel-Baset, A., 2010. Venom yield and toxicities of six Egyptian snakes with a description of a procedure for estimating the amount of venom ejected by a sing…	0.24	ip	mammal	Mus_musculus	Mohamed et al 1977. Immunological studies on polyvalent and monovalent snake antivenins. Toxicon	0	0	0	47.62	1.59	0	50.79	no	Webber, M.M., X. Glaudas, J.A. Rodriguez-Robles. 2012. Do sidewinding rattlesnakes (Crotalus cerastes, Viperidae) cease feeding during the breeding season? Copeia 2012: 100-105.	1142.806978	3
Cerastes_cerastes	Viperidae	85	Spawls, S., Branch, B. & Branch, W. R. The dangerous snakes of Africa: natural history, species directory, venoms, and snakebite. (Ralph Curtis Pub, 1995).	325	236.0129175	51	Minton S.A. (1974) Venom Diseases. Ed. Thomas C.C., Springfield, Illinois.; Kochva E. (1978) Oral Glands of the Reptilia. In : Biology of the Reptilia.VIII. Eds. Gans C. and Gans K.A., Academic Press, London and New York. Abdel_Aal, A. and Abdel-Baset, A., 2010. Venom yield and toxicities of six Egyptian snakes with a description of a procedure for estimating the amount of venom ejected by a sing…	15	sc	mammal	Mus_musculus	Handbook of Natural Toxins: Reptile Venoms and Toxins	0	0	0	47.62	1.59	0	50.79	no	Webber, M.M., X. Glaudas, J.A. Rodriguez-Robles. 2012. Do sidewinding rattlesnakes (Crotalus cerastes, Viperidae) cease feeding during the breeding season? Copeia 2012: 100-105.	1142.806978	3
Cerastes_cerastes	Viperidae	85	Spawls, S., Branch, B. & Branch, W. R. The dangerous snakes of Africa: natural history, species directory, venoms, and snakebite. (Ralph Curtis Pub, 1995).	325	236.0129175	51	Minton S.A. (1974) Venom Diseases. Ed. Thomas C.C., Springfield, Illinois.; Kochva E. (1978) Oral Glands of the Reptilia. In : Biology of the Reptilia.VIII. Eds. Gans C. and Gans K.A., Academic Press, London and New York. Abdel_Aal, A. and Abdel-Baset, A., 2010. Venom yield and toxicities of six Egyptian snakes with a description of a procedure for estimating the amount of venom ejected by a sing…	0.45	iv	mammal	Mus_musculus	Hassan and El Hawary 1975	0	0	0	47.62	1.59	0	50.79	no	Webber, M.M., X. Glaudas, J.A. Rodriguez-Robles. 2012. Do sidewinding rattlesnakes (Crotalus cerastes, Viperidae) cease feeding during the breeding season? Copeia 2012: 100-105.	1142.806978	3
Cerastes_cerastes	Viperidae	85	Spawls, S., Branch, B. & Branch, W. R. The dangerous snakes of Africa: natural history, species directory, venoms, and snakebite. (Ralph Curtis Pub, 1995).	325	236.0129175	51	Minton S.A. (1974) Venom Diseases. Ed. Thomas C.C., Springfield, Illinois.; Kochva E. (1978) Oral Glands of the Reptilia. In : Biology of the Reptilia.VIII. Eds. Gans C. and Gans K.A., Academic Press, London and New York. Abdel_Aal, A. and Abdel-Baset, A., 2010. Venom yield and toxicities of six Egyptian snakes with a description of a procedure for estimating the amount of venom ejected by a sing…	7.5	iv	mammal	Mus_musculus	Minton 1976 NEUTRALIZATION OF OLD WORLD VIPER VENOMS BY AMERICAN PIT VIPER ANTIVENOM	0	0	0	47.62	1.59	0	50.79	no	Webber, M.M., X. Glaudas, J.A. Rodriguez-Robles. 2012. Do sidewinding rattlesnakes (Crotalus cerastes, Viperidae) cease feeding during the breeding season? Copeia 2012: 100-105.	1142.806978	3
Cerastes_vipera	Viperidae	53	Navy, U. Poisonous snakes of the world. US Govt New York: Dover Publications Inc, 203-206 (1991).	82	316.35	22.3	Abdel_Aal, A. and Abdel-Baset, A., 2010. Venom yield and toxicities of six Egyptian snakes with a description of a procedure for estimating the amount of venom ejected by a single snake bite. Scientific Journal of King Faisal University (Basic and Applied Sciences), 11(1), p.1431.	0.53	iv	mammal	Mus_musculus	Theakston, R.D.G. and Reid, H.A., 1983. Development of simple standard assay procedures for the characterization of snake venoms. Bulletin of the world health organization, 61(6), p.949.	0	0	0	100	0	0	0	no	Sivan, J., Kam, M., Hadad, S., Degen, A.A., Rozenboim, I. and Rosenstrauch, A., 2013. Temporal activity and dietary selection in two coexisting desert snakes, the Saharan sand viper (Cerastes vipera) and the crowned leafnose (Lytorhynchus diadema). Zoology, 116(2), pp.113-117.	891.946959	3
Cerastes_vipera	Viperidae	53	Navy, U. Poisonous snakes of the world. US Govt New York: Dover Publications Inc, 203-206 (1991).	82	316.35	22.3	Abdel_Aal, A. and Abdel-Baset, A., 2010. Venom yield and toxicities of six Egyptian snakes with a description of a procedure for estimating the amount of venom ejected by a single snake bite. Scientific Journal of King Faisal University (Basic and Applied Sciences), 11(1), p.1431.	0.252	ip	mammal	Mus_musculus	Mohamed et al 1973. Immunological studies on Egyptian cobra antivenin. Toxicon	0	0	0	100	0	0	0	no	Sivan, J., Kam, M., Hadad, S., Degen, A.A., Rozenboim, I. and Rosenstrauch, A., 2013. Temporal activity and dietary selection in two coexisting desert snakes, the Saharan sand viper (Cerastes vipera) and the crowned leafnose (Lytorhynchus diadema). Zoology, 116(2), pp.113-117.	891.946959	3
Cerastes_vipera	Viperidae	53	Navy, U. Poisonous snakes of the world. US Govt New York: Dover Publications Inc, 203-206 (1991).	82	316.35	22.3	Abdel_Aal, A. and Abdel-Baset, A., 2010. Venom yield and toxicities of six Egyptian snakes with a description of a procedure for estimating the amount of venom ejected by a single snake bite. Scientific Journal of King Faisal University (Basic and Applied Sciences), 11(1), p.1431.	0.2	ip	mammal	Mus_musculus	Mohamed et al 1977. Immunological studies on polyvalent and monovalent snake antivenins. Toxicon	0	0	0	100	0	0	0	no	Sivan, J., Kam, M., Hadad, S., Degen, A.A., Rozenboim, I. and Rosenstrauch, A., 2013. Temporal activity and dietary selection in two coexisting desert snakes, the Saharan sand viper (Cerastes vipera) and the crowned leafnose (Lytorhynchus diadema). Zoology, 116(2), pp.113-117.	891.946959	3
Cerastes_vipera	Viperidae	53	Navy, U. Poisonous snakes of the world. US Govt New York: Dover Publications Inc, 203-206 (1991).	82	316.35	22.3	Abdel_Aal, A. and Abdel-Baset, A., 2010. Venom yield and toxicities of six Egyptian snakes with a description of a procedure for estimating the amount of venom ejected by a single snake bite. Scientific Journal of King Faisal University (Basic and Applied Sciences), 11(1), p.1431.	0.64	iv	mammal	Mus_musculus	Hassan and El Hawary 1975	0	0	0	100	0	0	0	no	Sivan, J., Kam, M., Hadad, S., Degen, A.A., Rozenboim, I. and Rosenstrauch, A., 2013. Temporal activity and dietary selection in two coexisting desert snakes, the Saharan sand viper (Cerastes vipera) and the crowned leafnose (Lytorhynchus diadema). Zoology, 116(2), pp.113-117.	891.946959	3
Cerastes_vipera	Viperidae	53	Navy, U. Poisonous snakes of the world. US Govt New York: Dover Publications Inc, 203-206 (1991).	82	316.35	22.3	Abdel_Aal, A. and Abdel-Baset, A., 2010. Venom yield and toxicities of six Egyptian snakes with a description of a procedure for estimating the amount of venom ejected by a single snake bite. Scientific Journal of King Faisal University (Basic and Applied Sciences), 11(1), p.1431.	0.578	ip	mammal	Mus_musculus	Abdel_Aal, A. and Abdel-Baset, A., 2010. Venom yield and toxicities of six Egyptian snakes with a description of a procedure for estimating the amount of venom ejected by a single snake bite. Scientific Journal of King Faisal University (Basic and Applied	0	0	0	100	0	0	0	no	Sivan, J., Kam, M., Hadad, S., Degen, A.A., Rozenboim, I. and Rosenstrauch, A., 2013. Temporal activity and dietary selection in two coexisting desert snakes, the Saharan sand viper (Cerastes vipera) and the crowned leafnose (Lytorhynchus diadema). Zoology, 116(2), pp.113-117.	891.946959	3
Crotalus_adamanteus	Viperidae	244	Boback, S. M. & Guyer, C. A test of reproductive power in snakes. Ecology 89, 1428-1435 (2008)	6987	65.5	579	Minton S.A. (1974) Venom Diseases. Ed. Thomas C.C., Springfield, Illinois.; Broad, A. J., Sutherland, S. K., Coulter, A.R. (1979). The lethality in mice of dangerous Australian and other snake venoms. Toxicon (17). 664-667. 11. ; U.S. Department of the Navy (1968) Poisonous Snakes of the World. United States Government Printing Office, Washington. D.C.; Minton S.A. (1974) Venom Diseases. Ed. Thom…	11.4	sc	mammal	Mus_musculus	Broad, A. J., Sutherland, S. K., Coulter, A.R. (1979). The lethality in mice of dangerous Australian and other snake venoms. Toxicon (17). 664-667. 11.	0	0	3.9	1.1	1.1	0	94	no	Ernst, C. H. & Ernst, E. M. Snakes of the United States and Canada. (Smithsonian Books, 2003).	645.4985497	2
Crotalus_adamanteus	Viperidae	244	Boback, S. M. & Guyer, C. A test of reproductive power in snakes. Ecology 89, 1428-1435 (2008)	6987	65.5	579	Minton S.A. (1974) Venom Diseases. Ed. Thomas C.C., Springfield, Illinois.; Broad, A. J., Sutherland, S. K., Coulter, A.R. (1979). The lethality in mice of dangerous Australian and other snake venoms. Toxicon (17). 664-667. 11. ; U.S. Department of the Navy (1968) Poisonous Snakes of the World. United States Government Printing Office, Washington. D.C.; Minton S.A. (1974) Venom Diseases. Ed. Thom…	1.69	iv	mammal	Mus_musculus	Ernst, C. H. & Ernst, E. M. Snakes of the United States and Canada. (Smithsonian Books, 2003).	0	0	3.9	1.1	1.1	0	94	no	Ernst, C. H. & Ernst, E. M. Snakes of the United States and Canada. (Smithsonian Books, 2003).	645.4985497	2
Crotalus_adamanteus	Viperidae	244	Boback, S. M. & Guyer, C. A test of reproductive power in snakes. Ecology 89, 1428-1435 (2008)	6987	65.5	579	Minton S.A. (1974) Venom Diseases. Ed. Thomas C.C., Springfield, Illinois.; Broad, A. J., Sutherland, S. K., Coulter, A.R. (1979). The lethality in mice of dangerous Australian and other snake venoms. Toxicon (17). 664-667. 11. ; U.S. Department of the Navy (1968) Poisonous Snakes of the World. United States Government Printing Office, Washington. D.C.; Minton S.A. (1974) Venom Diseases. Ed. Thom…	14.6	sc	mammal	Mus_musculus	Ernst, C. H. & Ernst, E. M. Snakes of the United States and Canada. (Smithsonian Books, 2003).	0	0	3.9	1.1	1.1	0	94	no	Ernst, C. H. & Ernst, E. M. Snakes of the United States and Canada. (Smithsonian Books, 2003).	645.4985497	2
Crotalus_adamanteus	Viperidae	244	Boback, S. M. & Guyer, C. A test of reproductive power in snakes. Ecology 89, 1428-1435 (2008)	6987	164.502	579	Minton S.A. (1974) Venom Diseases. Ed. Thomas C.C., Springfield, Illinois.; Broad, A. J., Sutherland, S. K., Coulter, A.R. (1979). The lethality in mice of dangerous Australian and other snake venoms. Toxicon (17). 664-667. 11. ; U.S. Department of the Navy (1968) Poisonous Snakes of the World. United States Government Printing Office, Washington. D.C.; Minton S.A. (1974) Venom Diseases. Ed. Thom…	1.18	iv	bird	Gallus_domesticus	Ernst, C. H. & Ernst, E. M. Snakes of the United States and Canada. (Smithsonian Books, 2003).	0	0	3.9	1.1	1.1	0	94	no	Ernst, C. H. & Ernst, E. M. Snakes of the United States and Canada. (Smithsonian Books, 2003).	645.4985497	2
Crotalus_adamanteus	Viperidae	244	Boback, S. M. & Guyer, C. A test of reproductive power in snakes. Ecology 89, 1428-1435 (2008)	6987	164.502	579	Minton S.A. (1974) Venom Diseases. Ed. Thomas C.C., Springfield, Illinois.; Broad, A. J., Sutherland, S. K., Coulter, A.R. (1979). The lethality in mice of dangerous Australian and other snake venoms. Toxicon (17). 664-667. 11. ; U.S. Department of the Navy (1968) Poisonous Snakes of the World. United States Government Printing Office, Washington. D.C.; Minton S.A. (1974) Venom Diseases. Ed. Thom…	2.38	ip	bird	Gallus_domesticus	Ernst, C. H. & Ernst, E. M. Snakes of the United States and Canada. (Smithsonian Books, 2003).	0	0	3.9	1.1	1.1	0	94	no	Ernst, C. H. & Ernst, E. M. Snakes of the United States and Canada. (Smithsonian Books, 2003).	645.4985497	2
Crotalus_adamanteus	Viperidae	244	Boback, S. M. & Guyer, C. A test of reproductive power in snakes. Ecology 89, 1428-1435 (2008)	6987	65.5	579	Minton S.A. (1974) Venom Diseases. Ed. Thomas C.C., Springfield, Illinois.; Broad, A. J., Sutherland, S. K., Coulter, A.R. (1979). The lethality in mice of dangerous Australian and other snake venoms. Toxicon (17). 664-667. 11. ; U.S. Department of the Navy (1968) Poisonous Snakes of the World. United States Government Printing Office, Washington. D.C.; Minton S.A. (1974) Venom Diseases. Ed. Thom…	1.89	ip	mammal	Mus_musculus	Ernst, C. H. & Ernst, E. M. Snakes of the United States and Canada. (Smithsonian Books, 2003).	0	0	3.9	1.1	1.1	0	94	no	Ernst, C. H. & Ernst, E. M. Snakes of the United States and Canada. (Smithsonian Books, 2003).	645.4985497	2
Crotalus_adamanteus	Viperidae	244	Boback, S. M. & Guyer, C. A test of reproductive power in snakes. Ecology 89, 1428-1435 (2008)	6987	164.502	579	Minton S.A. (1974) Venom Diseases. Ed. Thomas C.C., Springfield, Illinois.; Broad, A. J., Sutherland, S. K., Coulter, A.R. (1979). The lethality in mice of dangerous Australian and other snake venoms. Toxicon (17). 664-667. 11. ; U.S. Department of the Navy (1968) Poisonous Snakes of the World. United States Government Printing Office, Washington. D.C.; Minton S.A. (1974) Venom Diseases. Ed. Thom…	0.8	iv	bird	Columba_sp	Githens 1935	0	0	3.9	1.1	1.1	0	94	no	Ernst, C. H. & Ernst, E. M. Snakes of the United States and Canada. (Smithsonian Books, 2003).	645.4985497	2
Crotalus_atrox	Viperidae	213	Boback, S. M. & Guyer, C. A test of reproductive power in snakes. Ecology 89, 1428-1435 (2008)	4705	300.1975908	400	Gibbs, H.L. and Mackessy, S.P., 2009. Functional basis of a molecular adaptation: prey-specific toxic effects of venom from Sistrurus rattlesnakes. Toxicon, 53(6), pp.672-679.	0.4	iv	bird	Columba_sp	Githens 1935	0	0	0	12	2	0	86	no	Ernst, C. H. & Ernst, E. M. Snakes of the United States and Canada. (Smithsonian Books, 2003).	2000.557265	17
Crotalus_atrox	Viperidae	213	Boback, S. M. & Guyer, C. A test of reproductive power in snakes. Ecology 89, 1428-1435 (2008)	4705	162.731433	400	Gibbs, H.L. and Mackessy, S.P., 2009. Functional basis of a molecular adaptation: prey-specific toxic effects of venom from Sistrurus rattlesnakes. Toxicon, 53(6), pp.672-679.	3.56	iv	mammal	Mus_musculus	friederich and Tu 1971	0	0	0	12	2	0	86	no	Ernst, C. H. & Ernst, E. M. Snakes of the United States and Canada. (Smithsonian Books, 2003).	2000.557265	17
Crotalus_atrox	Viperidae	213	Boback, S. M. & Guyer, C. A test of reproductive power in snakes. Ecology 89, 1428-1435 (2008)	4705	162.731433	400	Gibbs, H.L. and Mackessy, S.P., 2009. Functional basis of a molecular adaptation: prey-specific toxic effects of venom from Sistrurus rattlesnakes. Toxicon, 53(6), pp.672-679.	4.266	ip	mammal	Mus_musculus	Kocholaty, W.F., Ledford, E.B., Daly, J.G. and Billings, T.A., 1971. Toxicity and some enzymatic properties and activities in the venoms of Crotalidae, Elapidae and Viperidae. Toxicon, 9(2), pp.131-138.	0	0	0	12	2	0	86	no	Ernst, C. H. & Ernst, E. M. Snakes of the United States and Canada. (Smithsonian Books, 2003).	2000.557265	17
Crotalus_atrox	Viperidae	213	Boback, S. M. & Guyer, C. A test of reproductive power in snakes. Ecology 89, 1428-1435 (2008)	4705	162.731433	400	Gibbs, H.L. and Mackessy, S.P., 2009. Functional basis of a molecular adaptation: prey-specific toxic effects of venom from Sistrurus rattlesnakes. Toxicon, 53(6), pp.672-679.	2.666	iv	mammal	Mus_musculus	Kocholaty, W.F., Ledford, E.B., Daly, J.G. and Billings, T.A., 1971. Toxicity and some enzymatic properties and activities in the venoms of Crotalidae, Elapidae and Viperidae. Toxicon, 9(2), pp.131-138.	0	0	0	12	2	0	86	no	Ernst, C. H. & Ernst, E. M. Snakes of the United States and Canada. (Smithsonian Books, 2003).	2000.557265	17
Crotalus_atrox	Viperidae	213	Boback, S. M. & Guyer, C. A test of reproductive power in snakes. Ecology 89, 1428-1435 (2008)	4705	162.731433	400	Gibbs, H.L. and Mackessy, S.P., 2009. Functional basis of a molecular adaptation: prey-specific toxic effects of venom from Sistrurus rattlesnakes. Toxicon, 53(6), pp.672-679.	20	im	mammal	Mus_musculus	Ownby et al 1975	0	0	0	12	2	0	86	no	Ernst, C. H. & Ernst, E. M. Snakes of the United States and Canada. (Smithsonian Books, 2003).	2000.557265	17
Crotalus_atrox	Viperidae	213	Boback, S. M. & Guyer, C. A test of reproductive power in snakes. Ecology 89, 1428-1435 (2008)	4705	162.731433	400	Gibbs, H.L. and Mackessy, S.P., 2009. Functional basis of a molecular adaptation: prey-specific toxic effects of venom from Sistrurus rattlesnakes. Toxicon, 53(6), pp.672-679.	2.5	iv	mammal	Mus_musculus	Schmidt et al 1976	0	0	0	12	2	0	86	no	Ernst, C. H. & Ernst, E. M. Snakes of the United States and Canada. (Smithsonian Books, 2003).	2000.557265	17
Crotalus_atrox	Viperidae	213	Boback, S. M. & Guyer, C. A test of reproductive power in snakes. Ecology 89, 1428-1435 (2008)	4705	162.731433	400	Gibbs, H.L. and Mackessy, S.P., 2009. Functional basis of a molecular adaptation: prey-specific toxic effects of venom from Sistrurus rattlesnakes. Toxicon, 53(6), pp.672-679.	4.5	ip	mammal	Mus_musculus	Glenn and Straight 1978	0	0	0	12	2	0	86	no	Ernst, C. H. & Ernst, E. M. Snakes of the United States and Canada. (Smithsonian Books, 2003).	2000.557265	17
Crotalus_atrox	Viperidae	213	Boback, S. M. & Guyer, C. A test of reproductive power in snakes. Ecology 89, 1428-1435 (2008)	4705	155.7508243	400	Gibbs, H.L. and Mackessy, S.P., 2009. Functional basis of a molecular adaptation: prey-specific toxic effects of venom from Sistrurus rattlesnakes. Toxicon, 53(6), pp.672-679.	172	ip	mammal	Sigmodon_hispidus	Perez et al 1979	0	0	0	12	2	0	86	no	Ernst, C. H. & Ernst, E. M. Snakes of the United States and Canada. (Smithsonian Books, 2003).	2000.557265	17
Crotalus_atrox	Viperidae	213	Boback, S. M. & Guyer, C. A test of reproductive power in snakes. Ecology 89, 1428-1435 (2008)	4705	151.3468318	400	Gibbs, H.L. and Mackessy, S.P., 2009. Functional basis of a molecular adaptation: prey-specific toxic effects of venom from Sistrurus rattlesnakes. Toxicon, 53(6), pp.672-679.	1121	ip	mammal	Neotoma_micropus	Perez et al 1979	0	0	0	12	2	0	86	no	Ernst, C. H. & Ernst, E. M. Snakes of the United States and Canada. (Smithsonian Books, 2003).	2000.557265	17
Crotalus_atrox	Viperidae	213	Boback, S. M. & Guyer, C. A test of reproductive power in snakes. Ecology 89, 1428-1435 (2008)	4705	283.911264	400	Gibbs, H.L. and Mackessy, S.P., 2009. Functional basis of a molecular adaptation: prey-specific toxic effects of venom from Sistrurus rattlesnakes. Toxicon, 53(6), pp.672-679.	1121	ip	mammal	Didelphis_virginiana	Perez et al 1979	0	0	0	12	2	0	86	no	Ernst, C. H. & Ernst, E. M. Snakes of the United States and Canada. (Smithsonian Books, 2003).	2000.557265	17
Crotalus_atrox	Viperidae	213	Boback, S. M. & Guyer, C. A test of reproductive power in snakes. Ecology 89, 1428-1435 (2008)	4705	162.731433	400	Gibbs, H.L. and Mackessy, S.P., 2009. Functional basis of a molecular adaptation: prey-specific toxic effects of venom from Sistrurus rattlesnakes. Toxicon, 53(6), pp.672-679.	3.6	iv	mammal	Mus_musculus	Handbook of Natural Toxins: Reptile Venoms and Toxins	0	0	0	12	2	0	86	no	Ernst, C. H. & Ernst, E. M. Snakes of the United States and Canada. (Smithsonian Books, 2003).	2000.557265	17
Crotalus_atrox	Viperidae	213	Boback, S. M. & Guyer, C. A test of reproductive power in snakes. Ecology 89, 1428-1435 (2008)	4705	162.731433	400	Gibbs, H.L. and Mackessy, S.P., 2009. Functional basis of a molecular adaptation: prey-specific toxic effects of venom from Sistrurus rattlesnakes. Toxicon, 53(6), pp.672-679.	3.65	iv	mammal	Mus_musculus	Ernst, C. H. & Ernst, E. M. Snakes of the United States and Canada. (Smithsonian Books, 2003).	0	0	0	12	2	0	86	no	Ernst, C. H. & Ernst, E. M. Snakes of the United States and Canada. (Smithsonian Books, 2003).	2000.557265	17
Crotalus_atrox	Viperidae	213	Boback, S. M. & Guyer, C. A test of reproductive power in snakes. Ecology 89, 1428-1435 (2008)	4705	162.731433	400	Gibbs, H.L. and Mackessy, S.P., 2009. Functional basis of a molecular adaptation: prey-specific toxic effects of venom from Sistrurus rattlesnakes. Toxicon, 53(6), pp.672-679.	17.8	sc	mammal	Mus_musculus	Ernst, C. H. & Ernst, E. M. Snakes of the United States and Canada. (Smithsonian Books, 2003).	0	0	0	12	2	0	86	no	Ernst, C. H. & Ernst, E. M. Snakes of the United States and Canada. (Smithsonian Books, 2003).	2000.557265	17
Crotalus_atrox	Viperidae	213	Boback, S. M. & Guyer, C. A test of reproductive power in snakes. Ecology 89, 1428-1435 (2008)	4705	162.731433	400	Gibbs, H.L. and Mackessy, S.P., 2009. Functional basis of a molecular adaptation: prey-specific toxic effects of venom from Sistrurus rattlesnakes. Toxicon, 53(6), pp.672-679.	3.5	ip	mammal	Mus_musculus	Gibbs, H.L. and Mackessy, S.P., 2009. Functional basis of a molecular adaptation: prey-specific toxic effects of venom from Sistrurus rattlesnakes. Toxicon, 53(6), pp.672-679.	0	0	0	12	2	0	86	no	Ernst, C. H. & Ernst, E. M. Snakes of the United States and Canada. (Smithsonian Books, 2003).	2000.557265	17
Crotalus_atrox	Viperidae	213	Boback, S. M. & Guyer, C. A test of reproductive power in snakes. Ecology 89, 1428-1435 (2008)	4705	162.7417868	400	Gibbs, H.L. and Mackessy, S.P., 2009. Functional basis of a molecular adaptation: prey-specific toxic effects of venom from Sistrurus rattlesnakes. Toxicon, 53(6), pp.672-679.	25	iv	mammal	Rattus_norvegicus	Gibbs, H.L. and Mackessy, S.P., 2009. Functional basis of a molecular adaptation: prey-specific toxic effects of venom from Sistrurus rattlesnakes. Toxicon, 53(6), pp.672-679.	0	0	0	12	2	0	86	no	Ernst, C. H. & Ernst, E. M. Snakes of the United States and Canada. (Smithsonian Books, 2003).	2000.557265	17
Crotalus_basiliscus	Viperidae	204.5	Ernst, C. H. & Ernst, E. M. Snakes of the United States and Canada. (Smithsonian Books, 2003).	4179	158.175	150	Gibbs, H.L. and Mackessy, S.P., 2009. Functional basis of a molecular adaptation: prey-specific toxic effects of venom from Sistrurus rattlesnakes. Toxicon, 53(6), pp.672-679.	2.8	sc	mammal	Mus_musculus	Minton 1977	0	0	0	0	0	0	100	no	Ernst, C. H. & Ernst, E. M. Snakes of the United States and Canada. (Smithsonian Books, 2003).	0	1
Crotalus_catalinensis	Viperidae	73	Campbell JA, Lamar WW. 2004. The Venomous Reptiles of the Western Hemisphere. Comstock Publishing Associates, Ithaca and London. 870 pp.	209	160.5469697	21	Ernst, C. H. & Ernst, E. M. Snakes of the United States and Canada. (Smithsonian Books, 2003).	4.1	ip	mammal	Mus_musculus	Glenn and Straight 1985. VENOM PROPERTIES OF THE RATTLESNAKES (CROTALUS) INHABITING THE BAJA CALIFORNIA REGION OF MEXICO	0	0	0	29.3	0	0	70.7	no	Ernst, C. H. & Ernst, E. M. Snakes of the United States and Canada. (Smithsonian Books, 2003).	1016.642824	4
Crotalus_catalinensis	Viperidae	73	Campbell JA, Lamar WW. 2004. The Venomous Reptiles of the Western Hemisphere. Comstock Publishing Associates, Ithaca and London. 870 pp.	209	160.5469697	21	Ernst, C. H. & Ernst, E. M. Snakes of the United States and Canada. (Smithsonian Books, 2003).	10.9	im	mammal	Mus_musculus	Glenn and Straight 1985. VENOM PROPERTIES OF THE RATTLESNAKES (CROTALUS) INHABITING THE BAJA CALIFORNIA REGION OF MEXICO	0	0	0	29.3	0	0	70.7	no	Ernst, C. H. & Ernst, E. M. Snakes of the United States and Canada. (Smithsonian Books, 2003).	1016.642824	4
Crotalus_cerastes	Viperidae	82	Boback, S. M. & Guyer, C. A test of reproductive power in snakes. Ecology 89, 1428-1435 (2008)	293	227.020341	33	Ernst, C. H. & Ernst, E. M. Snakes of the United States and Canada. (Smithsonian Books, 2003).	2.08	ip	mammal	Mus_musculus	Ernst, C. H. & Ernst, E. M. Snakes of the United States and Canada. (Smithsonian Books, 2003).	0	0	0	45.6	2.9	0	51.5	no	Ernst, C. H. & Ernst, E. M. Snakes of the United States and Canada. (Smithsonian Books, 2003).	2661.253858	31
Crotalus_cerastes	Viperidae	82	Boback, S. M. & Guyer, C. A test of reproductive power in snakes. Ecology 89, 1428-1435 (2008)	293	227.020341	33	Ernst, C. H. & Ernst, E. M. Snakes of the United States and Canada. (Smithsonian Books, 2003).	5.5	sc	mammal	Mus_musculus	Ernst, C. H. & Ernst, E. M. Snakes of the United States and Canada. (Smithsonian Books, 2003).	0	0	0	45.6	2.9	0	51.5	no	Ernst, C. H. & Ernst, E. M. Snakes of the United States and Canada. (Smithsonian Books, 2003).	2661.253858	31
Crotalus_cerastes	Viperidae	82	Boback, S. M. & Guyer, C. A test of reproductive power in snakes. Ecology 89, 1428-1435 (2008)	293	227.020341	33	Ernst, C. H. & Ernst, E. M. Snakes of the United States and Canada. (Smithsonian Books, 2003).	4	ip	mammal	Mus_musculus	Russell 1967	0	0	0	45.6	2.9	0	51.5	no	Ernst, C. H. & Ernst, E. M. Snakes of the United States and Canada. (Smithsonian Books, 2003).	2661.253858	31
Crotalus_cerastes	Viperidae	82	Boback, S. M. & Guyer, C. A test of reproductive power in snakes. Ecology 89, 1428-1435 (2008)	293	291.5970603	33	Ernst, C. H. & Ernst, E. M. Snakes of the United States and Canada. (Smithsonian Books, 2003).	0.34	iv	bird	Columba_sp	Githens 1935	0	0	0	45.6	2.9	0	51.5	no	Ernst, C. H. & Ernst, E. M. Snakes of the United States and Canada. (Smithsonian Books, 2003).	2661.253858	31
Crotalus_durissus	Viperidae	150	Boback, S. M. & Guyer, C. A test of reproductive power in snakes. Ecology 89, 1428-1435 (2008)	1696	74.40643498	74	Sanchez E.F., Freitas T.V., Ferreira-Alves D.L., Velarde D.T., Diniz M.R., Cordeiro M.N., Agostini-Cotta G. and Diniz C.R. (1992) Biological activities of venoms from South American Snakes. Toxicon, Vol. 30, p 95.; Minton S.A. (1974) Venom Diseases. Ed. Thomas C.C., Springfield, Illinois.; De Roodt A.R., Dolab J.A., Gallarce P.P., Gould E., Litwin S., Dokmetjian, J.C., Segre L. and Vidal J.C. (19…	0.71	ip	mammal	Mus_musculus	Crosland, R.D., 1988. Effect of chloroquine on toxicity in mice of the venom and neurotoxins from the snake Bungarus multicinctus. Journal of Pharmacology and Experimental Therapeutics, 246(3), pp.992-995.	0	0	0	0	0	0	100	no	Salom_o, M.D., Santos, S.M.A. and Puorto, G., 1995. Activity pattern of Crotalus durissus (Viperidae, Crotalinae): feeding, reproduction and snakebite. Studies on neotropical Fauna and environment, 30(2), pp.101-106.	667.6751847	3
Crotalus_durissus	Viperidae	150	Boback, S. M. & Guyer, C. A test of reproductive power in snakes. Ecology 89, 1428-1435 (2008)	1696	74.40643498	74	Sanchez E.F., Freitas T.V., Ferreira-Alves D.L., Velarde D.T., Diniz M.R., Cordeiro M.N., Agostini-Cotta G. and Diniz C.R. (1992) Biological activities of venoms from South American Snakes. Toxicon, Vol. 30, p 95.; Minton S.A. (1974) Venom Diseases. Ed. Thomas C.C., Springfield, Illinois.; De Roodt A.R., Dolab J.A., Gallarce P.P., Gould E., Litwin S., Dokmetjian, J.C., Segre L. and Vidal J.C. (19…	1.43	iv	mammal	Mus_musculus	Crosland, R.D., 1988. Effect of chloroquine on toxicity in mice of the venom and neurotoxins from the snake Bungarus multicinctus. Journal of Pharmacology and Experimental Therapeutics, 246(3), pp.992-995.	0	0	0	0	0	0	100	no	Salom_o, M.D., Santos, S.M.A. and Puorto, G., 1995. Activity pattern of Crotalus durissus (Viperidae, Crotalinae): feeding, reproduction and snakebite. Studies on neotropical Fauna and environment, 30(2), pp.101-106.	667.6751847	3
Crotalus_durissus	Viperidae	150	Boback, S. M. & Guyer, C. A test of reproductive power in snakes. Ecology 89, 1428-1435 (2008)	1696	74.40643498	74	Sanchez E.F., Freitas T.V., Ferreira-Alves D.L., Velarde D.T., Diniz M.R., Cordeiro M.N., Agostini-Cotta G. and Diniz C.R. (1992) Biological activities of venoms from South American Snakes. Toxicon, Vol. 30, p 95.; Minton S.A. (1974) Venom Diseases. Ed. Thomas C.C., Springfield, Illinois.; De Roodt A.R., Dolab J.A., Gallarce P.P., Gould E., Litwin S., Dokmetjian, J.C., Segre L. and Vidal J.C. (19…	1.79	iv	mammal	Mus_musculus	Crosland, R.D., 1988. Effect of chloroquine on toxicity in mice of the venom and neurotoxins from the snake Bungarus multicinctus. Journal of Pharmacology and Experimental Therapeutics, 246(3), pp.992-995.	0	0	0	0	0	0	100	no	Salom_o, M.D., Santos, S.M.A. and Puorto, G., 1995. Activity pattern of Crotalus durissus (Viperidae, Crotalinae): feeding, reproduction and snakebite. Studies on neotropical Fauna and environment, 30(2), pp.101-106.	667.6751847	3
Crotalus_durissus	Viperidae	150	Boback, S. M. & Guyer, C. A test of reproductive power in snakes. Ecology 89, 1428-1435 (2008)	1696	74.40643498	74	Sanchez E.F., Freitas T.V., Ferreira-Alves D.L., Velarde D.T., Diniz M.R., Cordeiro M.N., Agostini-Cotta G. and Diniz C.R. (1992) Biological activities of venoms from South American Snakes. Toxicon, Vol. 30, p 95.; Minton S.A. (1974) Venom Diseases. Ed. Thomas C.C., Springfield, Illinois.; De Roodt A.R., Dolab J.A., Gallarce P.P., Gould E., Litwin S., Dokmetjian, J.C., Segre L. and Vidal J.C. (19…	0.19	iv	mammal	Mus_musculus	Crosland, R.D., 1988. Effect of chloroquine on toxicity in mice of the venom and neurotoxins from the snake Bungarus multicinctus. Journal of Pharmacology and Experimental Therapeutics, 246(3), pp.992-995.	0	0	0	0	0	0	100	no	Salom_o, M.D., Santos, S.M.A. and Puorto, G., 1995. Activity pattern of Crotalus durissus (Viperidae, Crotalinae): feeding, reproduction and snakebite. Studies on neotropical Fauna and environment, 30(2), pp.101-106.	667.6751847	3
Crotalus_durissus	Viperidae	150	Boback, S. M. & Guyer, C. A test of reproductive power in snakes. Ecology 89, 1428-1435 (2008)	1696	74.40643498	74	Sanchez E.F., Freitas T.V., Ferreira-Alves D.L., Velarde D.T., Diniz M.R., Cordeiro M.N., Agostini-Cotta G. and Diniz C.R. (1992) Biological activities of venoms from South American Snakes. Toxicon, Vol. 30, p 95.; Minton S.A. (1974) Venom Diseases. Ed. Thomas C.C., Springfield, Illinois.; De Roodt A.R., Dolab J.A., Gallarce P.P., Gould E., Litwin S., Dokmetjian, J.C., Segre L. and Vidal J.C. (19…	0.25	ip	mammal	Mus_musculus	Crosland, R.D., 1988. Effect of chloroquine on toxicity in mice of the venom and neurotoxins from the snake Bungarus multicinctus. Journal of Pharmacology and Experimental Therapeutics, 246(3), pp.992-995.	0	0	0	0	0	0	100	no	Salom_o, M.D., Santos, S.M.A. and Puorto, G., 1995. Activity pattern of Crotalus durissus (Viperidae, Crotalinae): feeding, reproduction and snakebite. Studies on neotropical Fauna and environment, 30(2), pp.101-106.	667.6751847	3
Crotalus_durissus	Viperidae	150	Boback, S. M. & Guyer, C. A test of reproductive power in snakes. Ecology 89, 1428-1435 (2008)	1696	74.40643498	74	Sanchez E.F., Freitas T.V., Ferreira-Alves D.L., Velarde D.T., Diniz M.R., Cordeiro M.N., Agostini-Cotta G. and Diniz C.R. (1992) Biological activities of venoms from South American Snakes. Toxicon, Vol. 30, p 95.; Minton S.A. (1974) Venom Diseases. Ed. Thomas C.C., Springfield, Illinois.; De Roodt A.R., Dolab J.A., Gallarce P.P., Gould E., Litwin S., Dokmetjian, J.C., Segre L. and Vidal J.C. (19…	1.4	sc	mammal	Mus_musculus	Crosland, R.D., 1988. Effect of chloroquine on toxicity in mice of the venom and neurotoxins from the snake Bungarus multicinctus. Journal of Pharmacology and Experimental Therapeutics, 246(3), pp.992-995.	0	0	0	0	0	0	100	no	Salom_o, M.D., Santos, S.M.A. and Puorto, G., 1995. Activity pattern of Crotalus durissus (Viperidae, Crotalinae): feeding, reproduction and snakebite. Studies on neotropical Fauna and environment, 30(2), pp.101-106.	667.6751847	3
Crotalus_durissus	Viperidae	150	Boback, S. M. & Guyer, C. A test of reproductive power in snakes. Ecology 89, 1428-1435 (2008)	1696	74.40643498	74	Sanchez E.F., Freitas T.V., Ferreira-Alves D.L., Velarde D.T., Diniz M.R., Cordeiro M.N., Agostini-Cotta G. and Diniz C.R. (1992) Biological activities of venoms from South American Snakes. Toxicon, Vol. 30, p 95.; Minton S.A. (1974) Venom Diseases. Ed. Thomas C.C., Springfield, Illinois.; De Roodt A.R., Dolab J.A., Gallarce P.P., Gould E., Litwin S., Dokmetjian, J.C., Segre L. and Vidal J.C. (19…	0.61	ip	mammal	Mus_musculus	Aguilar, I., Guerrero, B., Salazar, A.M., Gir_n, M.E., P_rez, J.C., S_nchez, E.E. and Rodr�guez-Acosta, A., 2007. Individual venom variability in the South American rattlesnake Crotalus durissus cumanensis. Toxicon, 50(2), pp.214-224.	0	0	0	0	0	0	100	no	Salom_o, M.D., Santos, S.M.A. and Puorto, G., 1995. Activity pattern of Crotalus durissus (Viperidae, Crotalinae): feeding, reproduction and snakebite. Studies on neotropical Fauna and environment, 30(2), pp.101-106.	667.6751847	3
Crotalus_durissus	Viperidae	150	Boback, S. M. & Guyer, C. A test of reproductive power in snakes. Ecology 89, 1428-1435 (2008)	1696	74.40643498	200	Sanchez E.F., Freitas T.V., Ferreira-Alves D.L., Velarde D.T., Diniz M.R., Cordeiro M.N., Agostini-Cotta G. and Diniz C.R. (1992) Biological activities of venoms from South American Snakes. Toxicon, Vol. 30, p 95.; Minton S.A. (1974) Venom Diseases. Ed. Thomas C.C., Springfield, Illinois.; De Roodt A.R., Dolab J.A., Gallarce P.P., Gould E., Litwin S., Dokmetjian, J.C., Segre L. and Vidal J.C. (19…	0.13	ip	mammal	Mus_musculus	Crosland, R.D., 1988. Effect of chloroquine on toxicity in mice of the venom and neurotoxins from the snake Bungarus multicinctus. Journal of Pharmacology and Experimental Therapeutics, 246(3), pp.992-995.	0	0	0	0	0	0	100	no	Salom_o, M.D., Santos, S.M.A. and Puorto, G., 1995. Activity pattern of Crotalus durissus (Viperidae, Crotalinae): feeding, reproduction and snakebite. Studies on neotropical Fauna and environment, 30(2), pp.101-106.	667.6751847	3
Crotalus_durissus	Viperidae	150	Boback, S. M. & Guyer, C. A test of reproductive power in snakes. Ecology 89, 1428-1435 (2008)	1696	74.40643498	200	Sanchez E.F., Freitas T.V., Ferreira-Alves D.L., Velarde D.T., Diniz M.R., Cordeiro M.N., Agostini-Cotta G. and Diniz C.R. (1992) Biological activities of venoms from South American Snakes. Toxicon, Vol. 30, p 95.; Minton S.A. (1974) Venom Diseases. Ed. Thomas C.C., Springfield, Illinois.; De Roodt A.R., Dolab J.A., Gallarce P.P., Gould E., Litwin S., Dokmetjian, J.C., Segre L. and Vidal J.C. (19…	0.095	ip	mammal	Mus_musculus	N__ez, V., Otero, R., Barona, J., Fonnegra, R., Jim_nez, S., Osorio, R.G., Quintana, J.C. and D�az, A., 2004. Inhibition of the toxic effects of Lachesis muta, Crotalus durissus cumanensis and Micrurus mipartitus snake venoms by plant extracts. Pharmaceut	0	0	0	0	0	0	100	no	Salom_o, M.D., Santos, S.M.A. and Puorto, G., 1995. Activity pattern of Crotalus durissus (Viperidae, Crotalinae): feeding, reproduction and snakebite. Studies on neotropical Fauna and environment, 30(2), pp.101-106.	667.6751847	3
Crotalus_durissus	Viperidae	150	Boback, S. M. & Guyer, C. A test of reproductive power in snakes. Ecology 89, 1428-1435 (2008)	1696	74.40643498	200	Sanchez E.F., Freitas T.V., Ferreira-Alves D.L., Velarde D.T., Diniz M.R., Cordeiro M.N., Agostini-Cotta G. and Diniz C.R. (1992) Biological activities of venoms from South American Snakes. Toxicon, Vol. 30, p 95.; Minton S.A. (1974) Venom Diseases. Ed. Thomas C.C., Springfield, Illinois.; De Roodt A.R., Dolab J.A., Gallarce P.P., Gould E., Litwin S., Dokmetjian, J.C., Segre L. and Vidal J.C. (19…	0.473	im	mammal	Mus_musculus	N__ez, V., Otero, R., Barona, J., Fonnegra, R., Jim_nez, S., Osorio, R.G., Quintana, J.C. and D�az, A., 2004. Inhibition of the toxic effects of Lachesis muta, Crotalus durissus cumanensis and Micrurus mipartitus snake venoms by plant extracts. Pharmaceut	0	0	0	0	0	0	100	no	Salom_o, M.D., Santos, S.M.A. and Puorto, G., 1995. Activity pattern of Crotalus durissus (Viperidae, Crotalinae): feeding, reproduction and snakebite. Studies on neotropical Fauna and environment, 30(2), pp.101-106.	667.6751847	3
Crotalus_durissus	Viperidae	150	Boback, S. M. & Guyer, C. A test of reproductive power in snakes. Ecology 89, 1428-1435 (2008)	1696	74.40643498	200	Sanchez E.F., Freitas T.V., Ferreira-Alves D.L., Velarde D.T., Diniz M.R., Cordeiro M.N., Agostini-Cotta G. and Diniz C.R. (1992) Biological activities of venoms from South American Snakes. Toxicon, Vol. 30, p 95.; Minton S.A. (1974) Venom Diseases. Ed. Thomas C.C., Springfield, Illinois.; De Roodt A.R., Dolab J.A., Gallarce P.P., Gould E., Litwin S., Dokmetjian, J.C., Segre L. and Vidal J.C. (19…	0.667	ip	mammal	Mus_musculus	Kocholaty, W.F., Ledford, E.B., Daly, J.G. and Billings, T.A., 1971. Toxicity and some enzymatic properties and activities in the venoms of Crotalidae, Elapidae and Viperidae. Toxicon, 9(2), pp.131-138.	0	0	0	0	0	0	100	no	Salom_o, M.D., Santos, S.M.A. and Puorto, G., 1995. Activity pattern of Crotalus durissus (Viperidae, Crotalinae): feeding, reproduction and snakebite. Studies on neotropical Fauna and environment, 30(2), pp.101-106.	667.6751847	3
Crotalus_durissus	Viperidae	150	Boback, S. M. & Guyer, C. A test of reproductive power in snakes. Ecology 89, 1428-1435 (2008)	1696	74.40643498	200	Sanchez E.F., Freitas T.V., Ferreira-Alves D.L., Velarde D.T., Diniz M.R., Cordeiro M.N., Agostini-Cotta G. and Diniz C.R. (1992) Biological activities of venoms from South American Snakes. Toxicon, Vol. 30, p 95.; Minton S.A. (1974) Venom Diseases. Ed. Thomas C.C., Springfield, Illinois.; De Roodt A.R., Dolab J.A., Gallarce P.P., Gould E., Litwin S., Dokmetjian, J.C., Segre L. and Vidal J.C. (19…	1.244	iv	mammal	Mus_musculus	Kocholaty, W.F., Ledford, E.B., Daly, J.G. and Billings, T.A., 1971. Toxicity and some enzymatic properties and activities in the venoms of Crotalidae, Elapidae and Viperidae. Toxicon, 9(2), pp.131-138.	0	0	0	0	0	0	100	no	Salom_o, M.D., Santos, S.M.A. and Puorto, G., 1995. Activity pattern of Crotalus durissus (Viperidae, Crotalinae): feeding, reproduction and snakebite. Studies on neotropical Fauna and environment, 30(2), pp.101-106.	667.6751847	3
Crotalus_durissus	Viperidae	150	Boback, S. M. & Guyer, C. A test of reproductive power in snakes. Ecology 89, 1428-1435 (2008)	1696	74.40643498	200	Sanchez E.F., Freitas T.V., Ferreira-Alves D.L., Velarde D.T., Diniz M.R., Cordeiro M.N., Agostini-Cotta G. and Diniz C.R. (1992) Biological activities of venoms from South American Snakes. Toxicon, Vol. 30, p 95.; Minton S.A. (1974) Venom Diseases. Ed. Thomas C.C., Springfield, Illinois.; De Roodt A.R., Dolab J.A., Gallarce P.P., Gould E., Litwin S., Dokmetjian, J.C., Segre L. and Vidal J.C. (19…	0.052	ip	mammal	Mus_musculus	Handbook of Natural Toxins: Reptile Venoms and Toxins	0	0	0	0	0	0	100	no	Salom_o, M.D., Santos, S.M.A. and Puorto, G., 1995. Activity pattern of Crotalus durissus (Viperidae, Crotalinae): feeding, reproduction and snakebite. Studies on neotropical Fauna and environment, 30(2), pp.101-106.	667.6751847	3
Crotalus_durissus	Viperidae	150	Boback, S. M. & Guyer, C. A test of reproductive power in snakes. Ecology 89, 1428-1435 (2008)	1696	74.40643498	200	Sanchez E.F., Freitas T.V., Ferreira-Alves D.L., Velarde D.T., Diniz M.R., Cordeiro M.N., Agostini-Cotta G. and Diniz C.R. (1992) Biological activities of venoms from South American Snakes. Toxicon, Vol. 30, p 95.; Minton S.A. (1974) Venom Diseases. Ed. Thomas C.C., Springfield, Illinois.; De Roodt A.R., Dolab J.A., Gallarce P.P., Gould E., Litwin S., Dokmetjian, J.C., Segre L. and Vidal J.C. (19…	0.35	iv	mammal	Mus_musculus	friederich and Tu 1971	0	0	0	0	0	0	100	no	Salom_o, M.D., Santos, S.M.A. and Puorto, G., 1995. Activity pattern of Crotalus durissus (Viperidae, Crotalinae): feeding, reproduction and snakebite. Studies on neotropical Fauna and environment, 30(2), pp.101-106.	667.6751847	3
Crotalus_durissus	Viperidae	150	Boback, S. M. & Guyer, C. A test of reproductive power in snakes. Ecology 89, 1428-1435 (2008)	1696	74.40643498	200	Sanchez E.F., Freitas T.V., Ferreira-Alves D.L., Velarde D.T., Diniz M.R., Cordeiro M.N., Agostini-Cotta G. and Diniz C.R. (1992) Biological activities of venoms from South American Snakes. Toxicon, Vol. 30, p 95.; Minton S.A. (1974) Venom Diseases. Ed. Thomas C.C., Springfield, Illinois.; De Roodt A.R., Dolab J.A., Gallarce P.P., Gould E., Litwin S., Dokmetjian, J.C., Segre L. and Vidal J.C. (19…	0.4	ip	mammal	Mus_musculus	Kocholaty, W.F., Ledford, E.B., Daly, J.G. and Billings, T.A., 1971. Toxicity and some enzymatic properties and activities in the venoms of Crotalidae, Elapidae and Viperidae. Toxicon, 9(2), pp.131-138.	0	0	0	0	0	0	100	no	Salom_o, M.D., Santos, S.M.A. and Puorto, G., 1995. Activity pattern of Crotalus durissus (Viperidae, Crotalinae): feeding, reproduction and snakebite. Studies on neotropical Fauna and environment, 30(2), pp.101-106.	667.6751847	3
Crotalus_durissus	Viperidae	150	Boback, S. M. & Guyer, C. A test of reproductive power in snakes. Ecology 89, 1428-1435 (2008)	1696	74.40643498	200	Sanchez E.F., Freitas T.V., Ferreira-Alves D.L., Velarde D.T., Diniz M.R., Cordeiro M.N., Agostini-Cotta G. and Diniz C.R. (1992) Biological activities of venoms from South American Snakes. Toxicon, Vol. 30, p 95.; Minton S.A. (1974) Venom Diseases. Ed. Thomas C.C., Springfield, Illinois.; De Roodt A.R., Dolab J.A., Gallarce P.P., Gould E., Litwin S., Dokmetjian, J.C., Segre L. and Vidal J.C. (19…	0.267	iv	mammal	Mus_musculus	Kocholaty, W.F., Ledford, E.B., Daly, J.G. and Billings, T.A., 1971. Toxicity and some enzymatic properties and activities in the venoms of Crotalidae, Elapidae and Viperidae. Toxicon, 9(2), pp.131-138.	0	0	0	0	0	0	100	no	Salom_o, M.D., Santos, S.M.A. and Puorto, G., 1995. Activity pattern of Crotalus durissus (Viperidae, Crotalinae): feeding, reproduction and snakebite. Studies on neotropical Fauna and environment, 30(2), pp.101-106.	667.6751847	3
Crotalus_durissus	Viperidae	150	Boback, S. M. & Guyer, C. A test of reproductive power in snakes. Ecology 89, 1428-1435 (2008)	1696	74.40643498	200	Sanchez E.F., Freitas T.V., Ferreira-Alves D.L., Velarde D.T., Diniz M.R., Cordeiro M.N., Agostini-Cotta G. and Diniz C.R. (1992) Biological activities of venoms from South American Snakes. Toxicon, Vol. 30, p 95.; Minton S.A. (1974) Venom Diseases. Ed. Thomas C.C., Springfield, Illinois.; De Roodt A.R., Dolab J.A., Gallarce P.P., Gould E., Litwin S., Dokmetjian, J.C., Segre L. and Vidal J.C. (19…	0.169	iv	mammal	Mus_musculus	Handbook of Natural Toxins: Reptile Venoms and Toxins	0	0	0	0	0	0	100	no	Salom_o, M.D., Santos, S.M.A. and Puorto, G., 1995. Activity pattern of Crotalus durissus (Viperidae, Crotalinae): feeding, reproduction and snakebite. Studies on neotropical Fauna and environment, 30(2), pp.101-106.	667.6751847	3
Crotalus_durissus	Viperidae	150	Boback, S. M. & Guyer, C. A test of reproductive power in snakes. Ecology 89, 1428-1435 (2008)	1696	74.40643498	200	Sanchez E.F., Freitas T.V., Ferreira-Alves D.L., Velarde D.T., Diniz M.R., Cordeiro M.N., Agostini-Cotta G. and Diniz C.R. (1992) Biological activities of venoms from South American Snakes. Toxicon, Vol. 30, p 95.; Minton S.A. (1974) Venom Diseases. Ed. Thomas C.C., Springfield, Illinois.; De Roodt A.R., Dolab J.A., Gallarce P.P., Gould E., Litwin S., Dokmetjian, J.C., Segre L. and Vidal J.C. (19…	0.3	ip	mammal	Mus_musculus	U.S. Department of the Navy (1968) Poisonous Snakes of the World. United States Government Printing Office, Washington. D.C.; Minton S.A. (1974) Venom Diseases. Ed. Thomas C.C., Springfield, Illinois.	0	0	0	0	0	0	100	no	Salom_o, M.D., Santos, S.M.A. and Puorto, G., 1995. Activity pattern of Crotalus durissus (Viperidae, Crotalinae): feeding, reproduction and snakebite. Studies on neotropical Fauna and environment, 30(2), pp.101-106.	667.6751847	3
Crotalus_durissus	Viperidae	150	Boback, S. M. & Guyer, C. A test of reproductive power in snakes. Ecology 89, 1428-1435 (2008)	1696	74.40643498	200	Sanchez E.F., Freitas T.V., Ferreira-Alves D.L., Velarde D.T., Diniz M.R., Cordeiro M.N., Agostini-Cotta G. and Diniz C.R. (1992) Biological activities of venoms from South American Snakes. Toxicon, Vol. 30, p 95.; Minton S.A. (1974) Venom Diseases. Ed. Thomas C.C., Springfield, Illinois.; De Roodt A.R., Dolab J.A., Gallarce P.P., Gould E., Litwin S., Dokmetjian, J.C., Segre L. and Vidal J.C. (19…	0.2	ip	mammal	Mus_musculus	Glenn and Straight 1978	0	0	0	0	0	0	100	no	Salom_o, M.D., Santos, S.M.A. and Puorto, G., 1995. Activity pattern of Crotalus durissus (Viperidae, Crotalinae): feeding, reproduction and snakebite. Studies on neotropical Fauna and environment, 30(2), pp.101-106.	667.6751847	3
Crotalus_durissus	Viperidae	150	Boback, S. M. & Guyer, C. A test of reproductive power in snakes. Ecology 89, 1428-1435 (2008)	1696	74.40643498	200	Sanchez E.F., Freitas T.V., Ferreira-Alves D.L., Velarde D.T., Diniz M.R., Cordeiro M.N., Agostini-Cotta G. and Diniz C.R. (1992) Biological activities of venoms from South American Snakes. Toxicon, Vol. 30, p 95.; Minton S.A. (1974) Venom Diseases. Ed. Thomas C.C., Springfield, Illinois.; De Roodt A.R., Dolab J.A., Gallarce P.P., Gould E., Litwin S., Dokmetjian, J.C., Segre L. and Vidal J.C. (19…	0.13	ip	mammal	Mus_musculus	Hendon and Tu 1979 THE ROLE OF CROTOXIN SUBUNITS IN TROPICAL RATTLESNAKE NEUROTOXIC ACTION	0	0	0	0	0	0	100	no	Salom_o, M.D., Santos, S.M.A. and Puorto, G., 1995. Activity pattern of Crotalus durissus (Viperidae, Crotalinae): feeding, reproduction and snakebite. Studies on neotropical Fauna and environment, 30(2), pp.101-106.	667.6751847	3
Crotalus_durissus	Viperidae	150	Boback, S. M. & Guyer, C. A test of reproductive power in snakes. Ecology 89, 1428-1435 (2008)	1696	74.40643498	200	Sanchez E.F., Freitas T.V., Ferreira-Alves D.L., Velarde D.T., Diniz M.R., Cordeiro M.N., Agostini-Cotta G. and Diniz C.R. (1992) Biological activities of venoms from South American Snakes. Toxicon, Vol. 30, p 95.; Minton S.A. (1974) Venom Diseases. Ed. Thomas C.C., Springfield, Illinois.; De Roodt A.R., Dolab J.A., Gallarce P.P., Gould E., Litwin S., Dokmetjian, J.C., Segre L. and Vidal J.C. (19…	2.5	ip	mammal	Mus_musculus	Possani et al 1980	0	0	0	0	0	0	100	no	Salom_o, M.D., Santos, S.M.A. and Puorto, G., 1995. Activity pattern of Crotalus durissus (Viperidae, Crotalinae): feeding, reproduction and snakebite. Studies on neotropical Fauna and environment, 30(2), pp.101-106.	667.6751847	3
Crotalus_enyo	Viperidae	89.8	Ernst, C. H. & Ernst, E. M. Snakes of the United States and Canada. (Smithsonian Books, 2003).	381	204.5504466	30	Glenn J.L. and Straight R.C. (1985) Venom properties of the rattlesnakes ( Crotalus ) inhabiting the Baja California region of Mexico. Toxicon, Vol. 23, p 769.	4.6	im	mammal	Mus_musculus	Glenn and Straight 1985. VENOM PROPERTIES OF THE RATTLESNAKES (CROTALUS) INHABITING THE BAJA CALIFORNIA REGION OF MEXICO	0	6.4	0	33.3	0	0	60.3	no	Ernst, C. H. & Ernst, E. M. Snakes of the United States and Canada. (Smithsonian Books, 2003).	1840.355301	10
Crotalus_enyo	Viperidae	89.8	Ernst, C. H. & Ernst, E. M. Snakes of the United States and Canada. (Smithsonian Books, 2003).	381	204.5504466	30	Ernst, C. H. & Ernst, E. M. Snakes of the United States and Canada. (Smithsonian Books, 2003).	2.8	ip	mammal	Mus_musculus	Glenn and Straight 1985. VENOM PROPERTIES OF THE RATTLESNAKES (CROTALUS) INHABITING THE BAJA CALIFORNIA REGION OF MEXICO	0	6.4	0	33.3	0	0	60.3	no	Ernst, C. H. & Ernst, E. M. Snakes of the United States and Canada. (Smithsonian Books, 2003).	1840.355301	10
Crotalus_enyo	Viperidae	89.8	Ernst, C. H. & Ernst, E. M. Snakes of the United States and Canada. (Smithsonian Books, 2003).	381	327.9598216	30	Glenn J.L. and Straight R.C. (1985) Venom properties of the rattlesnakes ( Crotalus ) inhabiting the Baja California region of Mexico. Toxicon, Vol. 23, p 769.	0.286	iv	bird	Columba_livia	Githens 1935	0	6.4	0	33.3	0	0	60.3	no	Ernst, C. H. & Ernst, E. M. Snakes of the United States and Canada. (Smithsonian Books, 2003).	1840.355301	10
Crotalus_horridus	Viperidae	189	Boback, S. M. & Guyer, C. A test of reproductive power in snakes. Ecology 89, 1428-1435 (2008)	3323	140.9877677	150	Minton S.A. (1974) Venom Diseases. Ed. Thomas C.C., Springfield, Illinois.	2.63	iv	mammal	Mus_musculus	Russell and Emery 1959	0	0	0.32	1.1	6.7	0	92	no	Grundler, M.C. and Rabosky, D.L., 2014. Trophic divergence despite morphological convergence in a continental radiation of snakes. Proceedings of the Royal Society of London B: Biological Sciences, 281(1787), p.20140413.	2514.291574	18
Crotalus_horridus	Viperidae	189	Boback, S. M. & Guyer, C. A test of reproductive power in snakes. Ecology 89, 1428-1435 (2008)	3323	140.9877677	150	Minton S.A. (1974) Venom Diseases. Ed. Thomas C.C., Springfield, Illinois.	2.95	ip	mammal	Mus_musculus	Russell and Emery 1959	0	0	0.32	1.1	6.7	0	92	no	Grundler, M.C. and Rabosky, D.L., 2014. Trophic divergence despite morphological convergence in a continental radiation of snakes. Proceedings of the Royal Society of London B: Biological Sciences, 281(1787), p.20140413.	2514.291574	18
Crotalus_horridus	Viperidae	189	Boback, S. M. & Guyer, C. A test of reproductive power in snakes. Ecology 89, 1428-1435 (2008)	3323	140.9877677	150	Minton S.A. (1974) Venom Diseases. Ed. Thomas C.C., Springfield, Illinois.	5.045	ip	mammal	Mus_musculus	Glenn and Straight 1982	0	0	0.32	1.1	6.7	0	92	no	Grundler, M.C. and Rabosky, D.L., 2014. Trophic divergence despite morphological convergence in a continental radiation of snakes. Proceedings of the Royal Society of London B: Biological Sciences, 281(1787), p.20140413.	2514.291574	18
Crotalus_horridus	Viperidae	189	Boback, S. M. & Guyer, C. A test of reproductive power in snakes. Ecology 89, 1428-1435 (2008)	3323	140.9877677	150	Minton S.A. (1974) Venom Diseases. Ed. Thomas C.C., Springfield, Illinois.	2.365	iv	mammal	Mus_musculus	Glenn and Straight 1982	0	0	0.32	1.1	6.7	0	92	no	Grundler, M.C. and Rabosky, D.L., 2014. Trophic divergence despite morphological convergence in a continental radiation of snakes. Proceedings of the Royal Society of London B: Biological Sciences, 281(1787), p.20140413.	2514.291574	18
Crotalus_horridus	Viperidae	189	Boback, S. M. & Guyer, C. A test of reproductive power in snakes. Ecology 89, 1428-1435 (2008)	3323	140.9877677	150	Minton S.A. (1974) Venom Diseases. Ed. Thomas C.C., Springfield, Illinois.	2.85	iv	mammal	Mus_musculus	Friederich and Tu 1971	0	0	0.32	1.1	6.7	0	92	no	Grundler, M.C. and Rabosky, D.L., 2014. Trophic divergence despite morphological convergence in a continental radiation of snakes. Proceedings of the Royal Society of London B: Biological Sciences, 281(1787), p.20140413.	2514.291574	18
Crotalus_horridus	Viperidae	189	Boback, S. M. & Guyer, C. A test of reproductive power in snakes. Ecology 89, 1428-1435 (2008)	3323	140.9877677	150	Minton S.A. (1974) Venom Diseases. Ed. Thomas C.C., Springfield, Illinois.	4	ip	mammal	Mus_musculus	Johnson et al 1968a	0	0	0.32	1.1	6.7	0	92	no	Grundler, M.C. and Rabosky, D.L., 2014. Trophic divergence despite morphological convergence in a continental radiation of snakes. Proceedings of the Royal Society of London B: Biological Sciences, 281(1787), p.20140413.	2514.291574	18
Crotalus_horridus	Viperidae	189	Boback, S. M. & Guyer, C. A test of reproductive power in snakes. Ecology 89, 1428-1435 (2008)	3323	140.9877677	150	Minton S.A. (1974) Venom Diseases. Ed. Thomas C.C., Springfield, Illinois.	6.1	sc	mammal	Mus_musculus	Glenn and Straight 1982	0	0	0.3	1.1	6.7	0	92	no	Grundler, M.C. and Rabosky, D.L., 2014. Trophic divergence despite morphological convergence in a continental radiation of snakes. Proceedings of the Royal Society of London B: Biological Sciences, 281(1787), p.20140413.	2514.291574	18
Crotalus_horridus	Viperidae	189	Boback, S. M. & Guyer, C. A test of reproductive power in snakes. Ecology 89, 1428-1435 (2008)	3323	140.9877677	150	Minton S.A. (1974) Venom Diseases. Ed. Thomas C.C., Springfield, Illinois.	3.1	sc	mammal	Mus_musculus	Tu 1970	0	0	0.32	1.1	6.7	0	92	no	Grundler, M.C. and Rabosky, D.L., 2014. Trophic divergence despite morphological convergence in a continental radiation of snakes. Proceedings of the Royal Society of London B: Biological Sciences, 281(1787), p.20140413.	2514.291574	18
Crotalus_horridus	Viperidae	189	Boback, S. M. & Guyer, C. A test of reproductive power in snakes. Ecology 89, 1428-1435 (2008)	3323	140.9877677	150	Minton S.A. (1974) Venom Diseases. Ed. Thomas C.C., Springfield, Illinois.	1	ip	mammal	Mus_musculus	Gibbs, H.L. and Mackessy, S.P., 2009. Functional basis of a molecular adaptation: prey-specific toxic effects of venom from Sistrurus rattlesnakes. Toxicon, 53(6), pp.672-679.	0	0	0.32	1	6.7	0	92	no	Grundler, M.C. and Rabosky, D.L., 2014. Trophic divergence despite morphological convergence in a continental radiation of snakes. Proceedings of the Royal Society of London B: Biological Sciences, 281(1787), p.20140413.	2514.291574	18
Crotalus_horridus	Viperidae	189	Boback, S. M. & Guyer, C. A test of reproductive power in snakes. Ecology 89, 1428-1435 (2008)	3323	300.650514	150	Minton S.A. (1974) Venom Diseases. Ed. Thomas C.C., Springfield, Illinois.	3.71	ip	bird	Gallus_gallus	Russell and Emery 1959	0	0	0.32	1	6.7	0	92	no	Grundler, M.C. and Rabosky, D.L., 2014. Trophic divergence despite morphological convergence in a continental radiation of snakes. Proceedings of the Royal Society of London B: Biological Sciences, 281(1787), p.20140413.	2514.291574	18
Crotalus_horridus	Viperidae	189	Boback, S. M. & Guyer, C. A test of reproductive power in snakes. Ecology 89, 1428-1435 (2008)	3323	300.650514	150	Minton S.A. (1974) Venom Diseases. Ed. Thomas C.C., Springfield, Illinois.	0.59	iv	bird	Gallus_gallus	Russell and Emery 1959	0	0	0.32	1	6.7	0	92	no	Grundler, M.C. and Rabosky, D.L., 2014. Trophic divergence despite morphological convergence in a continental radiation of snakes. Proceedings of the Royal Society of London B: Biological Sciences, 281(1787), p.20140413.	2514.291574	18
Crotalus_horridus	Viperidae	189	Boback, S. M. & Guyer, C. A test of reproductive power in snakes. Ecology 89, 1428-1435 (2008)	3323	301.8998221	150	Minton S.A. (1974) Venom Diseases. Ed. Thomas C.C., Springfield, Illinois.	1.14	iv	bird	Columba_sp	Githens 1935	0	0	0.32	1	6.7	0	92	no	Grundler, M.C. and Rabosky, D.L., 2014. Trophic divergence despite morphological convergence in a continental radiation of snakes. Proceedings of the Royal Society of London B: Biological Sciences, 281(1787), p.20140413.	2514.291574	18
Crotalus_lepidus	Viperidae	83	Boback, S. M. & Guyer, C. A test of reproductive power in snakes. Ecology 89, 1428-1435 (2008)	303	358.4660376	12.5	Ernst, C. H. & Ernst, E. M. Snakes of the United States and Canada. (Smithsonian Books, 2003).	9	iv	mammal	Mus_musculus	Ernst, C. H. & Ernst, E. M. Snakes of the United States and Canada. (Smithsonian Books, 2003).	0	28.3	0	56	1.9	0	13.8	no	Ernst, C. H. & Ernst, E. M. Snakes of the United States and Canada. (Smithsonian Books, 2003).	2234.443355	12
Crotalus_lepidus	Viperidae	83	Boback, S. M. & Guyer, C. A test of reproductive power in snakes. Ecology 89, 1428-1435 (2008)	303	358.4660376	12.5	Ernst, C. H. & Ernst, E. M. Snakes of the United States and Canada. (Smithsonian Books, 2003).	23.95	sc	mammal	Mus_musculus	Minton 1977	0	28.3	0	56	1.9	0	13.8	no	Ernst, C. H. & Ernst, E. M. Snakes of the United States and Canada. (Smithsonian Books, 2003).	2234.443355	12
Crotalus_lepidus	Viperidae	83	Boback, S. M. & Guyer, C. A test of reproductive power in snakes. Ecology 89, 1428-1435 (2008)	303	358.4660376	12.5	Ernst, C. H. & Ernst, E. M. Snakes of the United States and Canada. (Smithsonian Books, 2003).	1.55	ip	mammal	Mus_musculus	Gibbs, H.L. and Mackessy, S.P., 2009. Functional basis of a molecular adaptation: prey-specific toxic effects of venom from Sistrurus rattlesnakes. Toxicon, 53(6), pp.672-679.	0	28.3	0	56	1.9	0	13.8	no	Ernst, C. H. & Ernst, E. M. Snakes of the United States and Canada. (Smithsonian Books, 2003).	2234.443355	12
Crotalus_lepidus	Viperidae	83	Boback, S. M. & Guyer, C. A test of reproductive power in snakes. Ecology 89, 1428-1435 (2008)	303	358.4660376	12.5	Ernst, C. H. & Ernst, E. M. Snakes of the United States and Canada. (Smithsonian Books, 2003).	2.6	im	mammal	Mus_musculus	Glenn and Straight 1987	0	28.3	0	56	1.9	0	13.8	no	Ernst, C. H. & Ernst, E. M. Snakes of the United States and Canada. (Smithsonian Books, 2003).	2234.443355	12
Crotalus_lepidus	Viperidae	83	Boback, S. M. & Guyer, C. A test of reproductive power in snakes. Ecology 89, 1428-1435 (2008)	303	358.4660376	12.5	Ernst, C. H. & Ernst, E. M. Snakes of the United States and Canada. (Smithsonian Books, 2003).	15.4	ip	mammal	Mus_musculus	Glenn and Straight 1987	0	28.3	0	56	1.9	0	13.8	no	Ernst, C. H. & Ernst, E. M. Snakes of the United States and Canada. (Smithsonian Books, 2003).	2234.443355	12
Crotalus_lepidus	Viperidae	83	Boback, S. M. & Guyer, C. A test of reproductive power in snakes. Ecology 89, 1428-1435 (2008)	303	358.4660376	12.5	Ernst, C. H. & Ernst, E. M. Snakes of the United States and Canada. (Smithsonian Books, 2003).	8.8	im	mammal	Mus_musculus	Glenn and Straight 1987	0	28.3	0	56	1.9	0	13.8	no	Ernst, C. H. & Ernst, E. M. Snakes of the United States and Canada. (Smithsonian Books, 2003).	2234.443355	12
Crotalus_lepidus	Viperidae	83	Boback, S. M. & Guyer, C. A test of reproductive power in snakes. Ecology 89, 1428-1435 (2008)	303	358.4660376	12.5	Ernst, C. H. & Ernst, E. M. Snakes of the United States and Canada. (Smithsonian Books, 2003).	0.63	ip	mammal	Mus_musculus	Glenn and Straight 1987	0	28.3	0	56	1.9	0	13.8	no	Ernst, C. H. & Ernst, E. M. Snakes of the United States and Canada. (Smithsonian Books, 2003).	2234.443355	12
Crotalus_lepidus	Viperidae	83	Boback, S. M. & Guyer, C. A test of reproductive power in snakes. Ecology 89, 1428-1435 (2008)	303	358.4660376	12.5	Ernst, C. H. & Ernst, E. M. Snakes of the United States and Canada. (Smithsonian Books, 2003).	1.34	ip	mammal	Mus_musculus	Forstner et al 1997	0	28.3	0	56	1.9	0	13.8	no	Ernst, C. H. & Ernst, E. M. Snakes of the United States and Canada. (Smithsonian Books, 2003).	2234.443355	12
Crotalus_lepidus	Viperidae	83	Boback, S. M. & Guyer, C. A test of reproductive power in snakes. Ecology 89, 1428-1435 (2008)	303	334.6742129	12.5	Ernst, C. H. & Ernst, E. M. Snakes of the United States and Canada. (Smithsonian Books, 2003).	0.03	iv	bird	Columba_sp	Githens 1935	0	28.3	0	56	1.9	0	13.8	no	Ernst, C. H. & Ernst, E. M. Snakes of the United States and Canada. (Smithsonian Books, 2003).	2234.443355	12
Crotalus_mitchellii	Viperidae	132	Boback, S. M. & Guyer, C. A test of reproductive power in snakes. Ecology 89, 1428-1435 (2008)	1169	215.118	131	Ernst, C. H. & Ernst, E. M. Snakes of the United States and Canada. (Smithsonian Books, 2003).	2.05	ip	mammal	Mus_musculus	Ernst, C. H. & Ernst, E. M. Snakes of the United States and Canada. (Smithsonian Books, 2003).	0	0	0	32	4	0	64	no	Ernst, C. H. & Ernst, E. M. Snakes of the United States and Canada. (Smithsonian Books, 2003).	1142.806978	3
Crotalus_mitchellii	Viperidae	132	Boback, S. M. & Guyer, C. A test of reproductive power in snakes. Ecology 89, 1428-1435 (2008)	1169	215.118	131	Ernst, C. H. & Ernst, E. M. Snakes of the United States and Canada. (Smithsonian Books, 2003).	0.4	ip	mammal	Mus_musculus	Ernst, C. H. & Ernst, E. M. Snakes of the United States and Canada. (Smithsonian Books, 2003).	0	0	0	32	4	0	64	no	Ernst, C. H. & Ernst, E. M. Snakes of the United States and Canada. (Smithsonian Books, 2003).	1142.806978	3
Crotalus_mitchellii	Viperidae	132	Boback, S. M. & Guyer, C. A test of reproductive power in snakes. Ecology 89, 1428-1435 (2008)	1169	215.118	131	Ernst, C. H. & Ernst, E. M. Snakes of the United States and Canada. (Smithsonian Books, 2003).	0.18	ip	mammal	Mus_musculus	Ernst, C. H. & Ernst, E. M. Snakes of the United States and Canada. (Smithsonian Books, 2003).	0	0	0	32	4	0	64	no	Ernst, C. H. & Ernst, E. M. Snakes of the United States and Canada. (Smithsonian Books, 2003).	1142.806978	3
Crotalus_mitchellii	Viperidae	132	Boback, S. M. & Guyer, C. A test of reproductive power in snakes. Ecology 89, 1428-1435 (2008)	1169	215.118	131	Ernst, C. H. & Ernst, E. M. Snakes of the United States and Canada. (Smithsonian Books, 2003).	0.2	im	mammal	Mus_musculus	Ernst, C. H. & Ernst, E. M. Snakes of the United States and Canada. (Smithsonian Books, 2003).	0	0	0	32	4	0	64	no	Ernst, C. H. & Ernst, E. M. Snakes of the United States and Canada. (Smithsonian Books, 2003).	1142.806978	3
Crotalus_mitchellii	Viperidae	132	Boback, S. M. & Guyer, C. A test of reproductive power in snakes. Ecology 89, 1428-1435 (2008)	1169	215.118	131	Ernst, C. H. & Ernst, E. M. Snakes of the United States and Canada. (Smithsonian Books, 2003).	0.47	im	mammal	Mus_musculus	Ernst, C. H. & Ernst, E. M. Snakes of the United States and Canada. (Smithsonian Books, 2003).	0	0	0	32	4	0	64	no	Ernst, C. H. & Ernst, E. M. Snakes of the United States and Canada. (Smithsonian Books, 2003).	1142.806978	3
Crotalus_mitchellii	Viperidae	132	Boback, S. M. & Guyer, C. A test of reproductive power in snakes. Ecology 89, 1428-1435 (2008)	1169	215.118	131	Ernst, C. H. & Ernst, E. M. Snakes of the United States and Canada. (Smithsonian Books, 2003).	3.41	ip	mammal	Mus_musculus	Ernst, C. H. & Ernst, E. M. Snakes of the United States and Canada. (Smithsonian Books, 2003).	0	0	0	32	4	0	64	no	Ernst, C. H. & Ernst, E. M. Snakes of the United States and Canada. (Smithsonian Books, 2003).	1142.806978	3
Crotalus_mitchellii	Viperidae	132	Boback, S. M. & Guyer, C. A test of reproductive power in snakes. Ecology 89, 1428-1435 (2008)	1169	215.118	131	Ernst, C. H. & Ernst, E. M. Snakes of the United States and Canada. (Smithsonian Books, 2003).	2.5	ip	mammal	Mus_musculus	Ernst, C. H. & Ernst, E. M. Snakes of the United States and Canada. (Smithsonian Books, 2003).	0	0	0	32	4	0	64	no	Ernst, C. H. & Ernst, E. M. Snakes of the United States and Canada. (Smithsonian Books, 2003).	1142.806978	3
Crotalus_mitchellii	Viperidae	132	Boback, S. M. & Guyer, C. A test of reproductive power in snakes. Ecology 89, 1428-1435 (2008)	1169	215.118	131	Ernst, C. H. & Ernst, E. M. Snakes of the United States and Canada. (Smithsonian Books, 2003).	2.7	ip	mammal	Mus_musculus	Glenn and Straight 1985. VENOM PROPERTIES OF THE RATTLESNAKES (CROTALUS) INHABITING THE BAJA CALIFORNIA REGION OF MEXICO	0	0	0	32	4	0	64	no	Ernst, C. H. & Ernst, E. M. Snakes of the United States and Canada. (Smithsonian Books, 2003).	1142.806978	3
Crotalus_mitchellii	Viperidae	132	Boback, S. M. & Guyer, C. A test of reproductive power in snakes. Ecology 89, 1428-1435 (2008)	1169	215.118	131	Ernst, C. H. & Ernst, E. M. Snakes of the United States and Canada. (Smithsonian Books, 2003).	9.6	im	mammal	Mus_musculus	Glenn and Straight 1985. VENOM PROPERTIES OF THE RATTLESNAKES (CROTALUS) INHABITING THE BAJA CALIFORNIA REGION OF MEXICO	0	0	0	32	4	0	64	no	Ernst, C. H. & Ernst, E. M. Snakes of the United States and Canada. (Smithsonian Books, 2003).	1142.806978	3
Crotalus_mitchellii	Viperidae	132	Boback, S. M. & Guyer, C. A test of reproductive power in snakes. Ecology 89, 1428-1435 (2008)	1169	215.118	131	Ernst, C. H. & Ernst, E. M. Snakes of the United States and Canada. (Smithsonian Books, 2003).	0.18	ip	mammal	Mus_musculus	Glenn and Straight 1985. VENOM PROPERTIES OF THE RATTLESNAKES (CROTALUS) INHABITING THE BAJA CALIFORNIA REGION OF MEXICO	0	0	0	32	4	0	64	no	Ernst, C. H. & Ernst, E. M. Snakes of the United States and Canada. (Smithsonian Books, 2003).	1142.806978	3
Crotalus_mitchellii	Viperidae	132	Boback, S. M. & Guyer, C. A test of reproductive power in snakes. Ecology 89, 1428-1435 (2008)	1169	215.118	131	Ernst, C. H. & Ernst, E. M. Snakes of the United States and Canada. (Smithsonian Books, 2003).	0.3	im	mammal	Mus_musculus	Glenn and Straight 1985. VENOM PROPERTIES OF THE RATTLESNAKES (CROTALUS) INHABITING THE BAJA CALIFORNIA REGION OF MEXICO	0	0	0	32	4	0	64	no	Ernst, C. H. & Ernst, E. M. Snakes of the United States and Canada. (Smithsonian Books, 2003).	1142.806978	3
Crotalus_mitchellii	Viperidae	132	Boback, S. M. & Guyer, C. A test of reproductive power in snakes. Ecology 89, 1428-1435 (2008)	1169	295.831	131	Ernst, C. H. & Ernst, E. M. Snakes of the United States and Canada. (Smithsonian Books, 2003).	1.43	iv	bird	Columba_sp	Githens 1935	0	0	0	32	4	0	64	no	Ernst, C. H. & Ernst, E. M. Snakes of the United States and Canada. (Smithsonian Books, 2003).	1142.806978	3
Crotalus_mitchellii	Viperidae	132	Boback, S. M. & Guyer, C. A test of reproductive power in snakes. Ecology 89, 1428-1435 (2008)	1169	295.831	131	Ernst, C. H. & Ernst, E. M. Snakes of the United States and Canada. (Smithsonian Books, 2003).	0.11	iv	bird	Columba_sp	Githens 1935	0	0	0	32	4	0	64	no	Ernst, C. H. & Ernst, E. M. Snakes of the United States and Canada. (Smithsonian Books, 2003).	1142.806978	3
Crotalus_molossus	Viperidae	126	Boback, S. M. & Guyer, C. A test of reproductive power in snakes. Ecology 89, 1428-1435 (2008)	1021	162.79845	286	Ernst, C. H. & Ernst, E. M. Snakes of the United States and Canada. (Smithsonian Books, 2003).	2.63	iv	mammal	Mus_musculus	Hardy et al 1982	0	0	0	0	16.7	0	83.3	no	Ernst, C. H. & Ernst, E. M. Snakes of the United States and Canada. (Smithsonian Books, 2003).	1009.706856	5
Crotalus_molossus	Viperidae	126	Boback, S. M. & Guyer, C. A test of reproductive power in snakes. Ecology 89, 1428-1435 (2008)	1021	162.79845	286	Ernst, C. H. & Ernst, E. M. Snakes of the United States and Canada. (Smithsonian Books, 2003).	2.7	ip	mammal	Mus_musculus	Gibbs, H.L. and Mackessy, S.P., 2009. Functional basis of a molecular adaptation: prey-specific toxic effects of venom from Sistrurus rattlesnakes. Toxicon, 53(6), pp.672-679.	0	0	0	0	16.7	0	83.3	no	Ernst, C. H. & Ernst, E. M. Snakes of the United States and Canada. (Smithsonian Books, 2003).	1009.706856	5
Crotalus_molossus	Viperidae	126	Boback, S. M. & Guyer, C. A test of reproductive power in snakes. Ecology 89, 1428-1435 (2008)	1021	162.79845	286	Ernst, C. H. & Ernst, E. M. Snakes of the United States and Canada. (Smithsonian Books, 2003).	8.36	im	mammal	Mus_musculus	Hardy et al 1982	0	0	0	0	16.7	0	83.3	no	Ernst, C. H. & Ernst, E. M. Snakes of the United States and Canada. (Smithsonian Books, 2003).	1009.706856	5
Crotalus_molossus	Viperidae	126	Boback, S. M. & Guyer, C. A test of reproductive power in snakes. Ecology 89, 1428-1435 (2008)	1021	162.79845	286	Ernst, C. H. & Ernst, E. M. Snakes of the United States and Canada. (Smithsonian Books, 2003).	2.44	im	mammal	Mus_musculus	Hardy et al 1982	0	0	0	0	16.7	0	83.3	no	Ernst, C. H. & Ernst, E. M. Snakes of the United States and Canada. (Smithsonian Books, 2003).	1009.706856	5
Crotalus_molossus	Viperidae	126	Boback, S. M. & Guyer, C. A test of reproductive power in snakes. Ecology 89, 1428-1435 (2008)	1021	162.79845	286	Ernst, C. H. & Ernst, E. M. Snakes of the United States and Canada. (Smithsonian Books, 2003).	2.35	ip	mammal	Mus_musculus	Ramirez et al 1990	0	0	0	0	16.7	0	83.3	no	Ernst, C. H. & Ernst, E. M. Snakes of the United States and Canada. (Smithsonian Books, 2003).	1009.706856	5
Crotalus_molossus	Viperidae	126	Boback, S. M. & Guyer, C. A test of reproductive power in snakes. Ecology 89, 1428-1435 (2008)	1021	289.934775	286	Ernst, C. H. & Ernst, E. M. Snakes of the United States and Canada. (Smithsonian Books, 2003).	0.91	iv	bird	Columba_sp	Githens 1935	0	0	0	0	16.7	0	83.3	no	Ernst, C. H. & Ernst, E. M. Snakes of the United States and Canada. (Smithsonian Books, 2003).	1009.706856	5
Crotalus_oreganus	Viperidae	150	Ernst, C. H. & Ernst, E. M. Snakes of the United States and Canada. (Smithsonian Books, 2003).	1696	177.2528251	87.5	Ernst, C. H. & Ernst, E. M. Snakes of the United States and Canada. (Smithsonian Books, 2003).	3.2	ip	mammal	Mus_musculus	Gibbs, H.L. and Mackessy, S.P., 2009. Functional basis of a molecular adaptation: prey-specific toxic effects of venom from Sistrurus rattlesnakes. Toxicon, 53(6), pp.672-679.	0	0	2.3	10.3	2.3	0	85.1	no	Grundler, M.C. and Rabosky, D.L., 2014. Trophic divergence despite morphological convergence in a continental radiation of snakes. Proceedings of the Royal Society of London B: Biological Sciences, 281(1787), p.20140413.	2195.647605	14
Crotalus_oreganus	Viperidae	150	Ernst, C. H. & Ernst, E. M. Snakes of the United States and Canada. (Smithsonian Books, 2003).	1696	177.2528251	87.5	Ernst, C. H. & Ernst, E. M. Snakes of the United States and Canada. (Smithsonian Books, 2003).	4.2	im	mammal	Mus_musculus	Glenn and Straight 1977	0	0	2.3	10.3	2.3	0	85.1	no	Grundler, M.C. and Rabosky, D.L., 2014. Trophic divergence despite morphological convergence in a continental radiation of snakes. Proceedings of the Royal Society of London B: Biological Sciences, 281(1787), p.20140413.	2195.647605	14
Crotalus_oreganus	Viperidae	150	Ernst, C. H. & Ernst, E. M. Snakes of the United States and Canada. (Smithsonian Books, 2003).	1696	177.2528251	87.5	Ernst, C. H. & Ernst, E. M. Snakes of the United States and Canada. (Smithsonian Books, 2003).	5.1	im	mammal	Mus_musculus	Glenn and Straight 1977	0	0	2.3	10.3	2.3	0	85.1	no	Grundler, M.C. and Rabosky, D.L., 2014. Trophic divergence despite morphological convergence in a continental radiation of snakes. Proceedings of the Royal Society of London B: Biological Sciences, 281(1787), p.20140413.	2195.647605	14
Crotalus_oreganus	Viperidae	150	Ernst, C. H. & Ernst, E. M. Snakes of the United States and Canada. (Smithsonian Books, 2003).	1696	177.2528251	87.5	Ernst, C. H. & Ernst, E. M. Snakes of the United States and Canada. (Smithsonian Books, 2003).	2	iv	mammal	Mus_musculus	Glenn and Straight 1977	0	0	2.3	10.3	2.3	0	85.1	no	Grundler, M.C. and Rabosky, D.L., 2014. Trophic divergence despite morphological convergence in a continental radiation of snakes. Proceedings of the Royal Society of London B: Biological Sciences, 281(1787), p.20140413.	2195.647605	14
Crotalus_oreganus	Viperidae	150	Ernst, C. H. & Ernst, E. M. Snakes of the United States and Canada. (Smithsonian Books, 2003).	1696	177.2528251	87.5	Ernst, C. H. & Ernst, E. M. Snakes of the United States and Canada. (Smithsonian Books, 2003).	0.045	iv	mammal	Mus_musculus	Aird and Kaiser 1985	0	0	2.3	10.3	2.3	0	85.1	no	Grundler, M.C. and Rabosky, D.L., 2014. Trophic divergence despite morphological convergence in a continental radiation of snakes. Proceedings of the Royal Society of London B: Biological Sciences, 281(1787), p.20140413.	2195.647605	14
Crotalus_oreganus	Viperidae	150	Ernst, C. H. & Ernst, E. M. Snakes of the United States and Canada. (Smithsonian Books, 2003).	1696	177.2528251	87.5	Ernst, C. H. & Ernst, E. M. Snakes of the United States and Canada. (Smithsonian Books, 2003).	2.1	iv	mammal	Mus_musculus	Glenn and Straight 1977	0	0	2.3	10.3	2.3	0	85.1	no	Grundler, M.C. and Rabosky, D.L., 2014. Trophic divergence despite morphological convergence in a continental radiation of snakes. Proceedings of the Royal Society of London B: Biological Sciences, 281(1787), p.20140413.	2195.647605	14
Crotalus_oreganus	Viperidae	75.6	Ernst, C. H. & Ernst, E. M. Snakes of the United States and Canada. (Smithsonian Books, 2003).	231	177.2528251	15.5	Ernst, C. H. & Ernst, E. M. Snakes of the United States and Canada. (Smithsonian Books, 2003).	0.3	iv	mammal	Mus_musculus	Glenn and Straight 1977	0	0	2.3	10.3	2.3	0	85.1	no	Grundler, M.C. and Rabosky, D.L., 2014. Trophic divergence despite morphological convergence in a continental radiation of snakes. Proceedings of the Royal Society of London B: Biological Sciences, 281(1787), p.20140413.	2195.647605	14
Crotalus_oreganus	Viperidae	75.6	Ernst, C. H. & Ernst, E. M. Snakes of the United States and Canada. (Smithsonian Books, 2003).	231	177.2528251	15.5	Ernst, C. H. & Ernst, E. M. Snakes of the United States and Canada. (Smithsonian Books, 2003).	0.25	ip	mammal	Mus_musculus	Glenn and Straight 1977	0	0	2.3	10.3	2.3	0	85.1	no	Grundler, M.C. and Rabosky, D.L., 2014. Trophic divergence despite morphological convergence in a continental radiation of snakes. Proceedings of the Royal Society of London B: Biological Sciences, 281(1787), p.20140413.	2195.647605	14
Crotalus_oreganus	Viperidae	75.6	Ernst, C. H. & Ernst, E. M. Snakes of the United States and Canada. (Smithsonian Books, 2003).	231	177.2528251	15.5	Ernst, C. H. & Ernst, E. M. Snakes of the United States and Canada. (Smithsonian Books, 2003).	2.8	ip	mammal	Mus_musculus	Glenn and Straight 1977	0	0	2.3	10.3	2.3	0	85.1	no	Grundler, M.C. and Rabosky, D.L., 2014. Trophic divergence despite morphological convergence in a continental radiation of snakes. Proceedings of the Royal Society of London B: Biological Sciences, 281(1787), p.20140413.	2195.647605	14
Crotalus_oreganus	Viperidae	75.6	Ernst, C. H. & Ernst, E. M. Snakes of the United States and Canada. (Smithsonian Books, 2003).	231	177.2528251	15.5	Ernst, C. H. & Ernst, E. M. Snakes of the United States and Canada. (Smithsonian Books, 2003).	1.2	im	mammal	Mus_musculus	Glenn and Straight 1977	0	0	2.3	10.3	2.3	0	85.1	no	Grundler, M.C. and Rabosky, D.L., 2014. Trophic divergence despite morphological convergence in a continental radiation of snakes. Proceedings of the Royal Society of London B: Biological Sciences, 281(1787), p.20140413.	2195.647605	14
Crotalus_oreganus	Viperidae	105.5	Ernst, C. H. & Ernst, E. M. Snakes of the United States and Canada. (Smithsonian Books, 2003).	609	177.2528251	100.5	Ernst, C. H. & Ernst, E. M. Snakes of the United States and Canada. (Smithsonian Books, 2003).	2.5	ip	mammal	Mus_musculus	Glenn and Straight 1977	0	0	2.3	10.3	2.3	0	85.1	no	Grundler, M.C. and Rabosky, D.L., 2014. Trophic divergence despite morphological convergence in a continental radiation of snakes. Proceedings of the Royal Society of London B: Biological Sciences, 281(1787), p.20140413.	2195.647605	14
Crotalus_oreganus	Viperidae	105.5	Ernst, C. H. & Ernst, E. M. Snakes of the United States and Canada. (Smithsonian Books, 2003).	609	177.2528251	100.5	Ernst, C. H. & Ernst, E. M. Snakes of the United States and Canada. (Smithsonian Books, 2003).	6	im	mammal	Mus_musculus	Glenn and Straight 1977	0	0	2.3	10.3	2.3	0	85.1	no	Grundler, M.C. and Rabosky, D.L., 2014. Trophic divergence despite morphological convergence in a continental radiation of snakes. Proceedings of the Royal Society of London B: Biological Sciences, 281(1787), p.20140413.	2195.647605	14
Crotalus_oreganus	Viperidae	102.5	Ernst, C. H. & Ernst, E. M. Snakes of the United States and Canada. (Smithsonian Books, 2003).	560	177.2528251	78.5	Ernst, C. H. & Ernst, E. M. Snakes of the United States and Canada. (Smithsonian Books, 2003).	2.2	ip	mammal	Mus_musculus	Glenn and Straight 1977	0	0	2.3	10.3	2.3	0	85.1	no	Grundler, M.C. and Rabosky, D.L., 2014. Trophic divergence despite morphological convergence in a continental radiation of snakes. Proceedings of the Royal Society of London B: Biological Sciences, 281(1787), p.20140413.	2195.647605	14
Crotalus_oreganus	Viperidae	162.6	Ernst, C. H. & Ernst, E. M. Snakes of the United States and Canada. (Smithsonian Books, 2003).	2145	177.2528251	90	Ernst, C. H. & Ernst, E. M. Snakes of the United States and Canada. (Smithsonian Books, 2003).	3.6	im	mammal	Mus_musculus	Glenn and Straight 1977	0	0	2.3	10.3	2.3	0	85.1	no	Grundler, M.C. and Rabosky, D.L., 2014. Trophic divergence despite morphological convergence in a continental radiation of snakes. Proceedings of the Royal Society of London B: Biological Sciences, 281(1787), p.20140413.	2195.647605	14
Crotalus_oreganus	Viperidae	162.6	Ernst, C. H. & Ernst, E. M. Snakes of the United States and Canada. (Smithsonian Books, 2003).	2145	177.2528251	90	Ernst, C. H. & Ernst, E. M. Snakes of the United States and Canada. (Smithsonian Books, 2003).	2.6	ip	mammal	Mus_musculus	Glenn and Straight 1977	0	0	2.3	10.3	2.3	0	85.1	no	Grundler, M.C. and Rabosky, D.L., 2014. Trophic divergence despite morphological convergence in a continental radiation of snakes. Proceedings of the Royal Society of London B: Biological Sciences, 281(1787), p.20140413.	2195.647605	14
Crotalus_oreganus	Viperidae	162.6	Ernst, C. H. & Ernst, E. M. Snakes of the United States and Canada. (Smithsonian Books, 2003).	2145	177.2528251	90	Ernst, C. H. & Ernst, E. M. Snakes of the United States and Canada. (Smithsonian Books, 2003).	3.2	ip	mammal	Mus_musculus	Glenn and Straight 1977	0	0	2.3	10.3	2.3	0	85.1	no	Grundler, M.C. and Rabosky, D.L., 2014. Trophic divergence despite morphological convergence in a continental radiation of snakes. Proceedings of the Royal Society of London B: Biological Sciences, 281(1787), p.20140413.	2195.647605	14
Crotalus_oreganus	Viperidae	162.6	Ernst, C. H. & Ernst, E. M. Snakes of the United States and Canada. (Smithsonian Books, 2003).	2145	177.2528251	90	Ernst, C. H. & Ernst, E. M. Snakes of the United States and Canada. (Smithsonian Books, 2003).	1.9	ip	mammal	Mus_musculus	Glenn and Straight 1977	0	0	2.3	10.3	2.3	0	85.1	no	Grundler, M.C. and Rabosky, D.L., 2014. Trophic divergence despite morphological convergence in a continental radiation of snakes. Proceedings of the Royal Society of London B: Biological Sciences, 281(1787), p.20140413.	2195.647605	14
Crotalus_oreganus	Viperidae	162.6	Ernst, C. H. & Ernst, E. M. Snakes of the United States and Canada. (Smithsonian Books, 2003).	2145	309.5930159	90	Ernst, C. H. & Ernst, E. M. Snakes of the United States and Canada. (Smithsonian Books, 2003).	0.29	iv	bird	Columba_sp	Githens 1935	0	0	2.3	10.3	2.3	0	85.1	no	Grundler, M.C. and Rabosky, D.L., 2014. Trophic divergence despite morphological convergence in a continental radiation of snakes. Proceedings of the Royal Society of London B: Biological Sciences, 281(1787), p.20140413.	2195.647605	14
Crotalus_pricei	Viperidae	65	Boback, S. M. & Guyer, C. A test of reproductive power in snakes. Ecology 89, 1428-1435 (2008)	149	291.8666667	6.1	Ernst, C. H. & Ernst, E. M. Snakes of the United States and Canada. (Smithsonian Books, 2003).	1.25	ip	mammal	Mus_musculus	Gibbs, H.L. and Mackessy, S.P., 2009. Functional basis of a molecular adaptation: prey-specific toxic effects of venom from Sistrurus rattlesnakes. Toxicon, 53(6), pp.672-679.	0	0	0	67	3	0	30	no	Ernst, C. H. & Ernst, E. M. Snakes of the United States and Canada. (Smithsonian Books, 2003).	1075.242635	5
Crotalus_pricei	Viperidae	65	Boback, S. M. & Guyer, C. A test of reproductive power in snakes. Ecology 89, 1428-1435 (2008)	149	276.9277778	6.1	Ernst, C. H. & Ernst, E. M. Snakes of the United States and Canada. (Smithsonian Books, 2003).	0.6	iv	bird	Columba_sp	Githens 1935	0	0	0	67	3	0	30	no	Ernst, C. H. & Ernst, E. M. Snakes of the United States and Canada. (Smithsonian Books, 2003).	1075.242635	5
Crotalus_ruber	Viperidae	162.5	Ernst, C. H. & Ernst, E. M. Snakes of the United States and Canada. (Smithsonian Books, 2003).	2141	169.24725	221	Ernst, C. H. & Ernst, E. M. Snakes of the United States and Canada. (Smithsonian Books, 2003).	5.2	iv	mammal	Mus_musculus	Mori et al 1987	0	0	0	5.3	1.7	0	93	no	Ernst, C. H. & Ernst, E. M. Snakes of the United States and Canada. (Smithsonian Books, 2003).	1142.806978	3
Crotalus_ruber	Viperidae	162.5	Ernst, C. H. & Ernst, E. M. Snakes of the United States and Canada. (Smithsonian Books, 2003).	2141	169.24725	221	Ernst, C. H. & Ernst, E. M. Snakes of the United States and Canada. (Smithsonian Books, 2003).	4.5	ip	mammal	Mus_musculus	Glenn and Straight 1977	0	0	0	5.3	1.7	0	93	no	Ernst, C. H. & Ernst, E. M. Snakes of the United States and Canada. (Smithsonian Books, 2003).	1142.806978	3
Crotalus_ruber	Viperidae	162.5	Ernst, C. H. & Ernst, E. M. Snakes of the United States and Canada. (Smithsonian Books, 2003).	2141	169.24725	221	Glenn J.L. and Straight R.C. (1985) Venom properties of the rattlesnakes ( Crotalus ) inhabiting the Baja California region of Mexico. Toxicon, Vol. 23, p 769.; Mackessy, S.P., 1985. Fractionation of red diamond rattlesnake (Crotalus ruber ruber) venom: protease, phosphodiesterase, L-amino acid oxidase activities and effects of metal ions and inhibitors on protease activity. Toxicon, 23(2), pp.33…	11.5	im	mammal	Mus_musculus	Glenn and Straight 1977	0	0	0	5.3	1.7	0	93	no	Ernst, C. H. & Ernst, E. M. Snakes of the United States and Canada. (Smithsonian Books, 2003).	1142.806978	3
Crotalus_ruber	Viperidae	162.5	Ernst, C. H. & Ernst, E. M. Snakes of the United States and Canada. (Smithsonian Books, 2003).	2141	169.24725	221	Glenn J.L. and Straight R.C. (1985) Venom properties of the rattlesnakes ( Crotalus ) inhabiting the Baja California region of Mexico. Toxicon, Vol. 23, p 769.; Mackessy, S.P., 1985. Fractionation of red diamond rattlesnake (Crotalus ruber ruber) venom: protease, phosphodiesterase, L-amino acid oxidase activities and effects of metal ions and inhibitors on protease activity. Toxicon, 23(2), pp.33…	3.8	ip	mammal	Mus_musculus	Gibbs, H.L. and Mackessy, S.P., 2009. Functional basis of a molecular adaptation: prey-specific toxic effects of venom from Sistrurus rattlesnakes. Toxicon, 53(6), pp.672-679.	0	0	0	5.3	1.7	0	93	no	Ernst, C. H. & Ernst, E. M. Snakes of the United States and Canada. (Smithsonian Books, 2003).	1142.806978	3
Crotalus_ruber	Viperidae	162.5	Ernst, C. H. & Ernst, E. M. Snakes of the United States and Canada. (Smithsonian Books, 2003).	2141	311.310475	221	Glenn J.L. and Straight R.C. (1985) Venom properties of the rattlesnakes ( Crotalus ) inhabiting the Baja California region of Mexico. Toxicon, Vol. 23, p 769.; Mackessy, S.P., 1985. Fractionation of red diamond rattlesnake (Crotalus ruber ruber) venom: protease, phosphodiesterase, L-amino acid oxidase activities and effects of metal ions and inhibitors on protease activity. Toxicon, 23(2), pp.33…	1.54	iv	bird	Columba_sp	Githens 1935	0	0	0	5.3	1.7	0	93	no	Ernst, C. H. & Ernst, E. M. Snakes of the United States and Canada. (Smithsonian Books, 2003).	1142.806978	3
Crotalus_scutulatus	Viperidae	129	Boback, S. M. & Guyer, C. A test of reproductive power in snakes. Ecology 89, 1428-1435 (2008)	1093	128.558	70	Ernst, C. H. & Ernst, E. M. Snakes of the United States and Canada. (Smithsonian Books, 2003).	0.24	ip	mammal	Mus_musculus	Glenn and Straight 1978	0	0	0	3.15	0	0	96.85	no	Ernst, C. H. & Ernst, E. M. Snakes of the United States and Canada. (Smithsonian Books, 2003).	840.6032393	5
Crotalus_scutulatus	Viperidae	129	Boback, S. M. & Guyer, C. A test of reproductive power in snakes. Ecology 89, 1428-1435 (2008)	1093	128.558	70	Ernst, C. H. & Ernst, E. M. Snakes of the United States and Canada. (Smithsonian Books, 2003).	2.8	ip	mammal	Mus_musculus	Glenn and Straight 1978	0	0	0	3.15	0	0	96.85	no	Ernst, C. H. & Ernst, E. M. Snakes of the United States and Canada. (Smithsonian Books, 2003).	840.6032393	5
Crotalus_scutulatus	Viperidae	129	Boback, S. M. & Guyer, C. A test of reproductive power in snakes. Ecology 89, 1428-1435 (2008)	1093	128.558	70	Ernst, C. H. & Ernst, E. M. Snakes of the United States and Canada. (Smithsonian Books, 2003).	0.11	ip	mammal	Mus_musculus	Glenn and Straight 1978	0	0	0	3.15	0	0	96.85	no	Ernst, C. H. & Ernst, E. M. Snakes of the United States and Canada. (Smithsonian Books, 2003).	840.6032393	5
Crotalus_scutulatus	Viperidae	129	Boback, S. M. & Guyer, C. A test of reproductive power in snakes. Ecology 89, 1428-1435 (2008)	1093	128.558	70	Ernst, C. H. & Ernst, E. M. Snakes of the United States and Canada. (Smithsonian Books, 2003).	0.18	ip	mammal	Mus_musculus	Glenn and Straight 1978	0	0	0	3.15	0	0	96.85	no	Ernst, C. H. & Ernst, E. M. Snakes of the United States and Canada. (Smithsonian Books, 2003).	840.6032393	5
Crotalus_scutulatus	Viperidae	129	Boback, S. M. & Guyer, C. A test of reproductive power in snakes. Ecology 89, 1428-1435 (2008)	1093	128.558	70	Ernst, C. H. & Ernst, E. M. Snakes of the United States and Canada. (Smithsonian Books, 2003).	0.2	ip	mammal	Mus_musculus	Mackessy 2008 Venom Composition in Rattlesnakes: Trends and Biological Signicance	0	0	0	3.15	0	0	96.85	no	Ernst, C. H. & Ernst, E. M. Snakes of the United States and Canada. (Smithsonian Books, 2003).	840.6032393	5
Crotalus_scutulatus	Viperidae	129	Boback, S. M. & Guyer, C. A test of reproductive power in snakes. Ecology 89, 1428-1435 (2008)	1093	296.1036	70	Ernst, C. H. & Ernst, E. M. Snakes of the United States and Canada. (Smithsonian Books, 2003).	0.002	iv	bird	Columba_sp	Githens 1935	0	0	0	3.15	0	0	96.85	no	Ernst, C. H. & Ernst, E. M. Snakes of the United States and Canada. (Smithsonian Books, 2003).	840.6032393	5
Crotalus_tigris	Viperidae	90	Boback, S. M. & Guyer, C. A test of reproductive power in snakes. Ecology 89, 1428-1435 (2008)	384	224.6085	11.7	Ernst, C. H. & Ernst, E. M. Snakes of the United States and Canada. (Smithsonian Books, 2003).	0.056	iv	mammal	Mus_musculus	Ernst, C. H. & Ernst, E. M. Snakes of the United States and Canada. (Smithsonian Books, 2003).	0	0	0	39	3	0	58	no	Goode, M.J. and M.D. Wall. 2002. Tiger rattlesnake ecology and management. Nongame and Endangered Wildlife Program Heritage Report. Arizona Game and Fish Department, Phoenix, Arizona.	1142.806978	3
Crotalus_tigris	Viperidae	90	Boback, S. M. & Guyer, C. A test of reproductive power in snakes. Ecology 89, 1428-1435 (2008)	384	224.6085	11.7	Ernst, C. H. & Ernst, E. M. Snakes of the United States and Canada. (Smithsonian Books, 2003).	0.21	sc	mammal	Mus_musculus	Ernst, C. H. & Ernst, E. M. Snakes of the United States and Canada. (Smithsonian Books, 2003).	0	0	0	39	3	0	58	no	Goode, M.J. and M.D. Wall. 2002. Tiger rattlesnake ecology and management. Nongame and Endangered Wildlife Program Heritage Report. Arizona Game and Fish Department, Phoenix, Arizona.	1142.806978	3
Crotalus_tigris	Viperidae	90	Boback, S. M. & Guyer, C. A test of reproductive power in snakes. Ecology 89, 1428-1435 (2008)	384	224.6085	11.7	Ernst, C. H. & Ernst, E. M. Snakes of the United States and Canada. (Smithsonian Books, 2003).	0.07	ip	mammal	Mus_musculus	Gibbs, H.L. and Mackessy, S.P., 2009. Functional basis of a molecular adaptation: prey-specific toxic effects of venom from Sistrurus rattlesnakes. Toxicon, 53(6), pp.672-679.	0	0	0	39	3	0	58	no	Goode, M.J. and M.D. Wall. 2002. Tiger rattlesnake ecology and management. Nongame and Endangered Wildlife Program Heritage Report. Arizona Game and Fish Department, Phoenix, Arizona.	1142.806978	3
Crotalus_tigris	Viperidae	90	Boback, S. M. & Guyer, C. A test of reproductive power in snakes. Ecology 89, 1428-1435 (2008)	384	294.30825	11.7	Ernst, C. H. & Ernst, E. M. Snakes of the United States and Canada. (Smithsonian Books, 2003).	0.0114	iv	bird	Columba_sp	Githens 1935	0	0	0	39	3	0	58	no	Goode, M.J. and M.D. Wall. 2002. Tiger rattlesnake ecology and management. Nongame and Endangered Wildlife Program Heritage Report. Arizona Game and Fish Department, Phoenix, Arizona.	1142.806978	3
Crotalus_tortugensis	Viperidae	105.8	Ernst, C. H. & Ernst, E. M. Snakes of the United States and Canada. (Smithsonian Books, 2003).	614	96	63	Glenn J.L. and Straight R.C. (1985) Venom properties of the rattlesnakes ( Crotalus ) inhabiting the Baja California region of Mexico. Toxicon, Vol. 23, p 769.	1.8	ip	mammal	Mus_musculus	Ernst, C. H. & Ernst, E. M. Snakes of the United States and Canada. (Smithsonian Books, 2003).	0	0	0	0	0	0	100	no	Ernst, C. H. & Ernst, E. M. Snakes of the United States and Canada. (Smithsonian Books, 2003).	0	1
Crotalus_totonacus	Viperidae	105.8	Ernst, C. H. & Ernst, E. M. Snakes of the United States and Canada. (Smithsonian Books, 2003).	614	130.6	277	Ernst, C. H. & Ernst, E. M. Snakes of the United States and Canada. (Smithsonian Books, 2003).	2.5	ip	mammal	Mus_musculus	Possani et al 1980	0	0	0	0	17	0	83	no	Ernst, C. H. & Ernst, E. M. Snakes of the United States and Canada. (Smithsonian Books, 2003).	639.1046896	2
Crotalus_viridis	Viperidae	162	Boback, S. M. & Guyer, C. A test of reproductive power in snakes. Ecology 89, 1428-1435 (2008)	2122	101.3366317	62	Ernst, C. H. & Ernst, E. M. Snakes of the United States and Canada. (Smithsonian Books, 2003).	2	ip	mammal	Mus_musculus	Glenn and Straight 1977	0	0	0	0	9	0	91	no	Ernst, C. H. & Ernst, E. M. Snakes of the United States and Canada. (Smithsonian Books, 2003).	890.7068559	3
Crotalus_viridis	Viperidae	162	Boback, S. M. & Guyer, C. A test of reproductive power in snakes. Ecology 89, 1428-1435 (2008)	2122	101.3366317	62	Ernst, C. H. & Ernst, E. M. Snakes of the United States and Canada. (Smithsonian Books, 2003).	1.17	iv	mammal	Mus_musculus	Theakston, R.D.G. and Reid, H.A., 1983. Development of simple standard assay procedures for the characterization of snake venoms. Bulletin of the world health organization, 61(6), p.949.	0	0	0	0	9	0	91	no	Ernst, C. H. & Ernst, E. M. Snakes of the United States and Canada. (Smithsonian Books, 2003).	890.7068559	3
Crotalus_viridis	Viperidae	162	Boback, S. M. & Guyer, C. A test of reproductive power in snakes. Ecology 89, 1428-1435 (2008)	2122	101.3366317	62	Ernst, C. H. & Ernst, E. M. Snakes of the United States and Canada. (Smithsonian Books, 2003).	1.32	iv	mammal	Mus_musculus	Theakston, R.D.G. and Reid, H.A., 1983. Development of simple standard assay procedures for the characterization of snake venoms. Bulletin of the world health organization, 61(6), p.949.	0	0	0	0	9	0	91	no	Ernst, C. H. & Ernst, E. M. Snakes of the United States and Canada. (Smithsonian Books, 2003).	890.7068559	3
Crotalus_willardi	Viperidae	64	Boback, S. M. & Guyer, C. A test of reproductive power in snakes. Ecology 89, 1428-1435 (2008)	142	164.0282399	3.1	Ernst, C. H. & Ernst, E. M. Snakes of the United States and Canada. (Smithsonian Books, 2003).	1.61	iv	mammal	Mus_musculus	Minton and Weinstein 1984	0	0	0	26.4	9.4	0	62.3	no	Ernst, C. H. & Ernst, E. M. Snakes of the United States and Canada. (Smithsonian Books, 2003).	871.1068529	2
Crotalus_willardi	Viperidae	64	Boback, S. M. & Guyer, C. A test of reproductive power in snakes. Ecology 89, 1428-1435 (2008)	142	302.6579081	3.1	Ernst, C. H. & Ernst, E. M. Snakes of the United States and Canada. (Smithsonian Books, 2003).	0.29	iv	bird	Columba_sp	Githens 1935	0	0	0	26.4	9.4	0	62.3	no	Ernst, C. H. & Ernst, E. M. Snakes of the United States and Canada. (Smithsonian Books, 2003).	871.1068529	2
Cryptelytrops_albolabris	Viperidae	100	Boback, S. M. & Guyer, C. A test of reproductive power in snakes. Ecology 89, 1428-1435 (2008)	521	359.2	10.5	Minton S.A. (1974) Venom Diseases. Ed. Thomas C.C., Springfield, Illinois.	0.37	iv	mammal	Mus_musculus	Minton, S.A., 1968. Preliminary observations on the venom of Wagler's pit viper (Trimeresurus wagleri). Toxicon, 6(2), pp.93IN197-96IN2.	0	0	100	0	0	0	0	no	Orlov, N., Ananjeva, N. and Khalikov, R., 2002. Natural history of pitvipers in Eastern and Southeastern Asia. Biology of the Vipers, pp.345-361	0	1
Cryptelytrops_albolabris	Viperidae	100	Boback, S. M. & Guyer, C. A test of reproductive power in snakes. Ecology 89, 1428-1435 (2008)	521	359.2	10.5	Minton S.A. (1974) Venom Diseases. Ed. Thomas C.C., Springfield, Illinois.	12.75	sc	mammal	Mus_musculus	Minton, S.A., 1968. Preliminary observations on the venom of Wagler's pit viper (Trimeresurus wagleri). Toxicon, 6(2), pp.93IN197-96IN2.	0	0	100	0	0	0	0	no	Orlov, N., Ananjeva, N. and Khalikov, R., 2002. Natural history of pitvipers in Eastern and Southeastern Asia. Biology of the Vipers, pp.345-361	0	1
Daboia_russelii	Viperidae	150	Boback, S. M. & Guyer, C. A test of reproductive power in snakes. Ecology 89, 1428-1435 (2008)	1696	456.2898421	190	Minton S.A. (1974) Venom Diseases. Ed. Thomas C.C., Springfield, Illinois.	0.08	iv	mammal	Mus_musculus	Minton 1974	0	28	3	17	2	0	50	no	AUFFENBERG, W. 1980. The herpetofauna of Komodo with notes on adjacent areas. Bull. Florida State Museum, Biol. Sci. 25(2):39-156. ; Whitaker, R., 2006. Common Indian snakes: a field guide. Macmillan. pp 154	1965.049977	6
Daboia_russelii	Viperidae	150	Boback, S. M. & Guyer, C. A test of reproductive power in snakes. Ecology 89, 1428-1435 (2008)	1696	456.2898421	190	Minton S.A. (1974) Venom Diseases. Ed. Thomas C.C., Springfield, Illinois.	0.75	sc	mammal	Mus_musculus	Handbook of Natural Toxins: Reptile Venoms and Toxins	0	28	3	17	2	0	50	no	AUFFENBERG, W. 1980. The herpetofauna of Komodo with notes on adjacent areas. Bull. Florida State Museum, Biol. Sci. 25(2):39-156. ; Whitaker, R., 2006. Common Indian snakes: a field guide. Macmillan. pp 154	1965.049977	6
Daboia_russelii	Viperidae	150	Boback, S. M. & Guyer, C. A test of reproductive power in snakes. Ecology 89, 1428-1435 (2008)	1696	456.2898421	67.3	Gopalakrishnakone, P. and Chou, L.M., 1990. Snakes of medical importance (Asia-Pacific region). National University of Singapore.	0.6	ip	mammal	Mus_musculus	Maung-Maung-Thwin, P. Gopalakrishnakone, R. Yuen, C.H. Tan, A major lethal factor of the venom of Burmese Russell's viper (): Isolation, n-terminal sequencing and biological activities of daboiatoxin, Toxicon, Volume 33, Issue 1, 1995, Pages 63-76	0	28	3	17	2	0	50	no	AUFFENBERG, W. 1980. The herpetofauna of Komodo with notes on adjacent areas. Bull. Florida State Museum, Biol. Sci. 25(2):39-156. ; Whitaker, R., 2006. Common Indian snakes: a field guide. Macmillan. pp 154	1965.049977	6
Daboia_russelii	Viperidae	150	Boback, S. M. & Guyer, C. A test of reproductive power in snakes. Ecology 89, 1428-1435 (2008)	1696	456.2898421	67.3	Gopalakrishnakone, P. and Chou, L.M., 1990. Snakes of medical importance (Asia-Pacific region). National University of Singapore.	0.31	iv	mammal	Mus_musculus	Kankonkar et al 1972	0	28	3	17	2	0	50	no	AUFFENBERG, W. 1980. The herpetofauna of Komodo with notes on adjacent areas. Bull. Florida State Museum, Biol. Sci. 25(2):39-156. ; Whitaker, R., 2006. Common Indian snakes: a field guide. Macmillan. pp 154	1965.049977	6
Daboia_russelii	Viperidae	150	Boback, S. M. & Guyer, C. A test of reproductive power in snakes. Ecology 89, 1428-1435 (2008)	1696	456.2898421	67.3	Gopalakrishnakone, P. and Chou, L.M., 1990. Snakes of medical importance (Asia-Pacific region). National University of Singapore.	0.4	ip	mammal	Mus_musculus	Handbook of Natural Toxins: Reptile Venoms and Toxins	0	28	3	17	2	0	50	no	AUFFENBERG, W. 1980. The herpetofauna of Komodo with notes on adjacent areas. Bull. Florida State Museum, Biol. Sci. 25(2):39-156. ; Whitaker, R., 2006. Common Indian snakes: a field guide. Macmillan. pp 154	1965.049977	6
Daboia_russelii	Viperidae	150	Boback, S. M. & Guyer, C. A test of reproductive power in snakes. Ecology 89, 1428-1435 (2008)	1696	456.2898421	67.3	Gopalakrishnakone, P. and Chou, L.M., 1990. Snakes of medical importance (Asia-Pacific region). National University of Singapore.	2	sc	mammal	Mus_musculus	Handbook of Natural Toxins: Reptile Venoms and Toxins	0	28	3	17	2	0	50	no	AUFFENBERG, W. 1980. The herpetofauna of Komodo with notes on adjacent areas. Bull. Florida State Museum, Biol. Sci. 25(2):39-156. ; Whitaker, R., 2006. Common Indian snakes: a field guide. Macmillan. pp 154	1965.049977	6
Daboia_russelii	Viperidae	150	Boback, S. M. & Guyer, C. A test of reproductive power in snakes. Ecology 89, 1428-1435 (2008)	1696	456.2898421	67.3	Gopalakrishnakone, P. and Chou, L.M., 1990. Snakes of medical importance (Asia-Pacific region). National University of Singapore.	0.16	ip	mammal	Mus_musculus	Perez 1978. Resistance of warm blooded animals to snake venoms.	0	28	3	17	2	0	50	no	AUFFENBERG, W. 1980. The herpetofauna of Komodo with notes on adjacent areas. Bull. Florida State Museum, Biol. Sci. 25(2):39-156. ; Whitaker, R., 2006. Common Indian snakes: a field guide. Macmillan. pp 154	1965.049977	6
Daboia_russelii	Viperidae	150	Boback, S. M. & Guyer, C. A test of reproductive power in snakes. Ecology 89, 1428-1435 (2008)	1696	456.2898421	67.3	Gopalakrishnakone, P. and Chou, L.M., 1990. Snakes of medical importance (Asia-Pacific region). National University of Singapore.	0.489	ip	mammal	Mus_musculus	Kocholaty, W.F., Ledford, E.B., Daly, J.G. and Billings, T.A., 1971. Toxicity and some enzymatic properties and activities in the venoms of Crotalidae, Elapidae and Viperidae. Toxicon, 9(2), pp.131-138.	0	28	3	17	2	0	50	no	AUFFENBERG, W. 1980. The herpetofauna of Komodo with notes on adjacent areas. Bull. Florida State Museum, Biol. Sci. 25(2):39-156. ; Whitaker, R., 2006. Common Indian snakes: a field guide. Macmillan. pp 154	1965.049977	6
Daboia_russelii	Viperidae	150	Boback, S. M. & Guyer, C. A test of reproductive power in snakes. Ecology 89, 1428-1435 (2008)	1696	456.2898421	67.3	Gopalakrishnakone, P. and Chou, L.M., 1990. Snakes of medical importance (Asia-Pacific region). National University of Singapore.	0.178	iv	mammal	Mus_musculus	Kocholaty, W.F., Ledford, E.B., Daly, J.G. and Billings, T.A., 1971. Toxicity and some enzymatic properties and activities in the venoms of Crotalidae, Elapidae and Viperidae. Toxicon, 9(2), pp.131-138.	0	28	3	17	2	0	50	no	AUFFENBERG, W. 1980. The herpetofauna of Komodo with notes on adjacent areas. Bull. Florida State Museum, Biol. Sci. 25(2):39-156. ; Whitaker, R., 2006. Common Indian snakes: a field guide. Macmillan. pp 154	1965.049977	6
Daboia_russelii	Viperidae	150	Boback, S. M. & Guyer, C. A test of reproductive power in snakes. Ecology 89, 1428-1435 (2008)	1696	456.2898421	67.3	Gopalakrishnakone, P. and Chou, L.M., 1990. Snakes of medical importance (Asia-Pacific region). National University of Singapore.	0.4	ip	mammal	Mus_musculus	Kocholaty, W.F., Ledford, E.B., Daly, J.G. and Billings, T.A., 1971. Toxicity and some enzymatic properties and activities in the venoms of Crotalidae, Elapidae and Viperidae. Toxicon, 9(2), pp.131-138.	0	28	3	17	2	0	50	no	AUFFENBERG, W. 1980. The herpetofauna of Komodo with notes on adjacent areas. Bull. Florida State Museum, Biol. Sci. 25(2):39-156. ; Whitaker, R., 2006. Common Indian snakes: a field guide. Macmillan. pp 154	1965.049977	6
Daboia_russelii	Viperidae	150	Boback, S. M. & Guyer, C. A test of reproductive power in snakes. Ecology 89, 1428-1435 (2008)	1696	456.2898421	67.3	Gopalakrishnakone, P. and Chou, L.M., 1990. Snakes of medical importance (Asia-Pacific region). National University of Singapore.	0.133	iv	mammal	Mus_musculus	Kocholaty, W.F., Ledford, E.B., Daly, J.G. and Billings, T.A., 1971. Toxicity and some enzymatic properties and activities in the venoms of Crotalidae, Elapidae and Viperidae. Toxicon, 9(2), pp.131-138.	0	28	3	17	2	0	50	no	AUFFENBERG, W. 1980. The herpetofauna of Komodo with notes on adjacent areas. Bull. Florida State Museum, Biol. Sci. 25(2):39-156. ; Whitaker, R., 2006. Common Indian snakes: a field guide. Macmillan. pp 154	1965.049977	6
Daboia_russelii	Viperidae	150	Boback, S. M. & Guyer, C. A test of reproductive power in snakes. Ecology 89, 1428-1435 (2008)	1696	456.2898421	67.3	Gopalakrishnakone, P. and Chou, L.M., 1990. Snakes of medical importance (Asia-Pacific region). National University of Singapore.	2.11	iv	mammal	Mus_musculus	Friederich and Tu 1971	0	28	3	17	2	0	50	no	AUFFENBERG, W. 1980. The herpetofauna of Komodo with notes on adjacent areas. Bull. Florida State Museum, Biol. Sci. 25(2):39-156. ; Whitaker, R., 2006. Common Indian snakes: a field guide. Macmillan. pp 154	1965.049977	6
Daboia_russelii	Viperidae	150	Boback, S. M. & Guyer, C. A test of reproductive power in snakes. Ecology 89, 1428-1435 (2008)	1696	456.2898421	67.3	Gopalakrishnakone, P. and Chou, L.M., 1990. Snakes of medical importance (Asia-Pacific region). National University of Singapore.	2.1	im	mammal	Mus_musculus	Tu et al 1969	0	28	3	17	2	0	50	no	AUFFENBERG, W. 1980. The herpetofauna of Komodo with notes on adjacent areas. Bull. Florida State Museum, Biol. Sci. 25(2):39-156. ; Whitaker, R., 2006. Common Indian snakes: a field guide. Macmillan. pp 154	1965.049977	6
Daboia_russelii	Viperidae	150	Boback, S. M. & Guyer, C. A test of reproductive power in snakes. Ecology 89, 1428-1435 (2008)	1696	456.2898421	67.3	Gopalakrishnakone, P. and Chou, L.M., 1990. Snakes of medical importance (Asia-Pacific region). National University of Singapore.	1.37	im	mammal	Mus_musculus	Handbook of Natural Toxins: Reptile Venoms and Toxins	0	28	3	17	2	0	50	no	AUFFENBERG, W. 1980. The herpetofauna of Komodo with notes on adjacent areas. Bull. Florida State Museum, Biol. Sci. 25(2):39-156. ; Whitaker, R., 2006. Common Indian snakes: a field guide. Macmillan. pp 154	1965.049977	6
Daboia_russelii	Viperidae	150	Boback, S. M. & Guyer, C. A test of reproductive power in snakes. Ecology 89, 1428-1435 (2008)	1696	474.6911242	67.3	Gopalakrishnakone, P. and Chou, L.M., 1990. Snakes of medical importance (Asia-Pacific region). National University of Singapore.	34.8	im	amphibian	Rana_sp	Handbook of Natural Toxins: Reptile Venoms and Toxins	0	28	3	17	2	0	50	no	AUFFENBERG, W. 1980. The herpetofauna of Komodo with notes on adjacent areas. Bull. Florida State Museum, Biol. Sci. 25(2):39-156. ; Whitaker, R., 2006. Common Indian snakes: a field guide. Macmillan. pp 154	1965.049977	6
Deinagkistrodon_acutus	Viperidae	154.5	Navy, U. Poisonous snakes of the world. US Govt New York: Dover Publications Inc, 203-206 (1991).	1848	158.175	150	Gopalakrishnakone, P. and Chou, L.M., 1990. Snakes of medical importance (Asia-Pacific region). National University of Singapore.; Sawai Y. (1976) Medical treatment of snakebites. 2. Southeast Asia. The Snake, Vol. 8(1), pp 1-30.	0.38	iv	mammal	Mus_musculus	Friederich and Tu 1971	0	0	0	0	0	0	100	no	Orlov, N., Ananjeva, N. and Khalikov, R., 2002. Natural history of pitvipers in Eastern and Southeastern Asia. Biology of the Vipers, pp.345-361	0	1
Deinagkistrodon_acutus	Viperidae	154.5	Navy, U. Poisonous snakes of the world. US Govt New York: Dover Publications Inc, 203-206 (1991).	1848	158.175	150	Gopalakrishnakone, P. and Chou, L.M., 1990. Snakes of medical importance (Asia-Pacific region). National University of Singapore.; Sawai Y. (1976) Medical treatment of snakebites. 2. Southeast Asia. The Snake, Vol. 8(1), pp 1-30.	9.6	sc	mammal	Mus_musculus	Brown JH. 1973. Toxicology and Pharmacology of Venoms from Poisonous Snakes. Springfield, Illinois: Charles C. Thomas. 184 pp.	0	0	0	0	0	0	100	no	Orlov, N., Ananjeva, N. and Khalikov, R., 2002. Natural history of pitvipers in Eastern and Southeastern Asia. Biology of the Vipers, pp.345-361	0	1
Dendroaspis_angusticeps	Elapidae	250	Spawls, S., Branch, B. & Branch, W. R. The dangerous snakes of Africa: natural history, species directory, venoms, and snakebite. (Ralph Curtis Pub, 1995). , S., Branch, B. (1995). The Dangerous Snakes of Africa. Blandford. pp. 49_51.	2290	214.2340324	77.5	Minton S.A. (1974) Venom Diseases. Ed. Thomas C.C., Springfield, Illinois.; U.S. Department of the Navy (1968) Poisonous Snakes of the World. United States Government Printing Office, Washington. D.C.	1.5	iv	mammal	Mus_musculus	Handbook of Natural Toxins: Reptile Venoms and Toxins	0	0	0	12	47	0	41	no	Branch, W.R., Haagner, G.V. and Shine, R., 1995. Is there an ontogenetic shift in mamba diet? Taxonomic confusion and dietary records for black and green mambas (Dendroaspis: Elapidae). Herpetol. Nat. Hist, 3, pp.171-178.	1439.365061	10
Dendroaspis_angusticeps	Elapidae	250	Spawls, S., Branch, B. & Branch, W. R. The dangerous snakes of Africa: natural history, species directory, venoms, and snakebite. (Ralph Curtis Pub, 1995). , S., Branch, B. (1995). The Dangerous Snakes of Africa. Blandford. pp. 49_51.	2290	214.2340324	77.5	Minton S.A. (1974) Venom Diseases. Ed. Thomas C.C., Springfield, Illinois.; U.S. Department of the Navy (1968) Poisonous Snakes of the World. United States Government Printing Office, Washington. D.C.	2.8	ip	mammal	Mus_musculus	Kabara, J.J. and Fischer, G., 1972. Methodology for the isolation of low molecular weight toxins from snake venoms. Toxicon, 10(3), pp.227-238.	0	0	0	12	47	0	41	no	Branch, W.R., Haagner, G.V. and Shine, R., 1995. Is there an ontogenetic shift in mamba diet? Taxonomic confusion and dietary records for black and green mambas (Dendroaspis: Elapidae). Herpetol. Nat. Hist, 3, pp.171-178.	1439.365061	10
Dendroaspis_angusticeps	Elapidae	250	Spawls, S., Branch, B. & Branch, W. R. The dangerous snakes of Africa: natural history, species directory, venoms, and snakebite. (Ralph Curtis Pub, 1995). , S., Branch, B. (1995). The Dangerous Snakes of Africa. Blandford. pp. 49_51.	2290	214.2340324	77.5	Minton S.A. (1974) Venom Diseases. Ed. Thomas C.C., Springfield, Illinois.; U.S. Department of the Navy (1968) Poisonous Snakes of the World. United States Government Printing Office, Washington. D.C.	3.05	sc	mammal	Mus_musculus	Handbook of Natural Toxins: Reptile Venoms and Toxins	0	0	0	12	47	0	41	no	Branch, W.R., Haagner, G.V. and Shine, R., 1995. Is there an ontogenetic shift in mamba diet? Taxonomic confusion and dietary records for black and green mambas (Dendroaspis: Elapidae). Herpetol. Nat. Hist, 3, pp.171-178.	1439.365061	10
Dendroaspis_angusticeps	Elapidae	250	Spawls, S., Branch, B. & Branch, W. R. The dangerous snakes of Africa: natural history, species directory, venoms, and snakebite. (Ralph Curtis Pub, 1995). , S., Branch, B. (1995). The Dangerous Snakes of Africa. Blandford. pp. 49_51.	2290	214.2340324	77.5	Minton S.A. (1974) Venom Diseases. Ed. Thomas C.C., Springfield, Illinois.; U.S. Department of the Navy (1968) Poisonous Snakes of the World. United States Government Printing Office, Washington. D.C.	0.08	ip	mammal	Mus_musculus	Mohamed et al 1974	0	0	0	12	47	0	41	no	Branch, W.R., Haagner, G.V. and Shine, R., 1995. Is there an ontogenetic shift in mamba diet? Taxonomic confusion and dietary records for black and green mambas (Dendroaspis: Elapidae). Herpetol. Nat. Hist, 3, pp.171-178.	1439.365061	10
Dendroaspis_angusticeps	Elapidae	250	Spawls, S., Branch, B. & Branch, W. R. The dangerous snakes of Africa: natural history, species directory, venoms, and snakebite. (Ralph Curtis Pub, 1995). , S., Branch, B. (1995). The Dangerous Snakes of Africa. Blandford. pp. 49_51.	2290	214.2340324	77.5	Minton S.A. (1974) Venom Diseases. Ed. Thomas C.C., Springfield, Illinois.; U.S. Department of the Navy (1968) Poisonous Snakes of the World. United States Government Printing Office, Washington. D.C.	2.588	iv	mammal	Mus_musculus	Christensen 1979	0	0	0	12	47	0	41	no	Branch, W.R., Haagner, G.V. and Shine, R., 1995. Is there an ontogenetic shift in mamba diet? Taxonomic confusion and dietary records for black and green mambas (Dendroaspis: Elapidae). Herpetol. Nat. Hist, 3, pp.171-178.	1439.365061	10
Dendroaspis_angusticeps	Elapidae	250	Spawls, S., Branch, B. & Branch, W. R. The dangerous snakes of Africa: natural history, species directory, venoms, and snakebite. (Ralph Curtis Pub, 1995). , S., Branch, B. (1995). The Dangerous Snakes of Africa. Blandford. pp. 49_51.	2290	214.2340324	77.5	Minton S.A. (1974) Venom Diseases. Ed. Thomas C.C., Springfield, Illinois.; U.S. Department of the Navy (1968) Poisonous Snakes of the World. United States Government Printing Office, Washington. D.C.	3.35	sc	mammal	Mus_musculus	Christensen 1979	0	0	0	12	47	0	41	no	Branch, W.R., Haagner, G.V. and Shine, R., 1995. Is there an ontogenetic shift in mamba diet? Taxonomic confusion and dietary records for black and green mambas (Dendroaspis: Elapidae). Herpetol. Nat. Hist, 3, pp.171-178.	1439.365061	10
Dispholidus_typus	Colubridae	213	Boback, S. M. & Guyer, C. A test of reproductive power in snakes. Ecology 89, 1428-1435 (2008)	773	313.1865	1.6	Spawls, S., Branch, B. & Branch, W. R. The dangerous snakes of Africa: natural history, species directory, venoms, and snakebite. (Ralph Curtis Pub, 1995). , S., Branch, B. (1995). The Dangerous Snakes of Africa. Blandford. pp. 49_51.	0.071	iv	mammal	Mus_musculus	Handbook of Natural Toxins: Reptile Venoms and Toxins	0	0	0	33.3	66.7	0	0	no	Akani, G.C., Ebere, N., Luiselli, L. and Eniang, E.A., 2008. Community structure and ecology of snakes in fields of oil palm trees (Elaeis guineensis) in the Niger Delta, southern Nigeria. African Journal of Ecology, 46(4), pp.500-506.	828.2001223	2
Dispholidus_typus	Colubridae	213	Boback, S. M. & Guyer, C. A test of reproductive power in snakes. Ecology 89, 1428-1435 (2008)	773	313.1865	1.6	Spawls, S., Branch, B. & Branch, W. R. The dangerous snakes of Africa: natural history, species directory, venoms, and snakebite. (Ralph Curtis Pub, 1995). , S., Branch, B. (1995). The Dangerous Snakes of Africa. Blandford. pp. 49_51.	0.06	iv	mammal	Mus_musculus	Mackessy, S.P., 2002. Biochemistry and pharmacology of colubrid snake venoms. Journal of Toxicology: Toxin Reviews, 21(1-2), pp.43-83.	0	0	0	33.3	66.7	0	0	no	Akani, G.C., Ebere, N., Luiselli, L. and Eniang, E.A., 2008. Community structure and ecology of snakes in fields of oil palm trees (Elaeis guineensis) in the Niger Delta, southern Nigeria. African Journal of Ecology, 46(4), pp.500-506.	828.2001223	2
Dispholidus_typus	Colubridae	213	Boback, S. M. & Guyer, C. A test of reproductive power in snakes. Ecology 89, 1428-1435 (2008)	773	313.1865	1.6	Spawls, S., Branch, B. & Branch, W. R. The dangerous snakes of Africa: natural history, species directory, venoms, and snakebite. (Ralph Curtis Pub, 1995). , S., Branch, B. (1995). The Dangerous Snakes of Africa. Blandford. pp. 49_51.	11.25	sc	mammal	Mus_musculus	Mackessy, S.P., 2002. Biochemistry and pharmacology of colubrid snake venoms. Journal of Toxicology: Toxin Reviews, 21(1-2), pp.43-83.	0	0	0	33.3	66.7	0	0	no	Akani, G.C., Ebere, N., Luiselli, L. and Eniang, E.A., 2008. Community structure and ecology of snakes in fields of oil palm trees (Elaeis guineensis) in the Niger Delta, southern Nigeria. African Journal of Ecology, 46(4), pp.500-506.	828.2001223	2
Dispholidus_typus	Colubridae	213	Boback, S. M. & Guyer, C. A test of reproductive power in snakes. Ecology 89, 1428-1435 (2008)	773	313.1865	1.6	Spawls, S., Branch, B. & Branch, W. R. The dangerous snakes of Africa: natural history, species directory, venoms, and snakebite. (Ralph Curtis Pub, 1995). , S., Branch, B. (1995). The Dangerous Snakes of Africa. Blandford. pp. 49_51.	1.56	ip	mammal	Mus_musculus	Weinstein, S.A. and Smith, L.A., 1993. Chromatographic profiles and properties of Duvernoy's secretions from some boigine and dispholidine colubrids. Herpetologica, pp.78-94.	0	0	0	33.3	66.7	0	0	no	Akani, G.C., Ebere, N., Luiselli, L. and Eniang, E.A., 2008. Community structure and ecology of snakes in fields of oil palm trees (Elaeis guineensis) in the Niger Delta, southern Nigeria. African Journal of Ecology, 46(4), pp.500-506.	828.2001223	2
Disteira_major	Elapidae	150	Boback, S. M. & Guyer, C. A test of reproductive power in snakes. Ecology 89, 1428-1435 (2008)	670	419	22.8	Limpus, C.J., 1978. Toxicology of the venom of subtropical Queensland Hydrophiidae. Toxicon, 1, pp.331-363.	0.21	iv	mammal	Mus_musculus	Mackessy, S.P. and Tu, A.T., 1993. Biology of the sea snakes and biochemistry of their venoms. Toxin-related Diseases: Poisons Originating from Plants, Animals and Spoilage. New Delhi: Oxford & IBH Publishing Co, pp.305-51.	100	0	0	0	0	0	0	no	Fry, G.C., A. Milton & T.J. Wassenberg (2001). The reproductive biology and diet of sea snake bycatch of prawn trawling in northern Australia: characteristics important for assessing the impacts on populations. Pacific Conservation Biology. 7:55-73	0	1
Echis_carinatus	Viperidae	72	Boback, S. M. & Guyer, C. A test of reproductive power in snakes. Ecology 89, 1428-1435 (2008)	200	414.1256	21.3	Latifi M. (1984) Variation in yield and lethality of venoms from Iranian snakes. Toxicon, Vol. 22, p 373.; Minton S.A. (1974) Venom Diseases. Ed. Thomas C.C., Springfield, Illinois.	1.29	iv	mammal	Mus_musculus	Christensen 1979	0	73	7	7	0	0	13	no	Barlow, A., Pook, C.E., Harrison, R.A. and W_ster, W., 2009. Coevolution of diet and prey-specific venom activity supports the role of selection in snake venom evolution. Proceedings of the Royal Society of London B: Biological Sciences, 276(1666), pp.2443-2449.	1740.806852	4
Echis_carinatus	Viperidae	72	Boback, S. M. & Guyer, C. A test of reproductive power in snakes. Ecology 89, 1428-1435 (2008)	200	414.1256	21.3	Latifi M. (1984) Variation in yield and lethality of venoms from Iranian snakes. Toxicon, Vol. 22, p 373.; Minton S.A. (1974) Venom Diseases. Ed. Thomas C.C., Springfield, Illinois.	8.88	sc	mammal	Mus_musculus	Christensen 1979	0	73	7	7	0	0	13	no	Barlow, A., Pook, C.E., Harrison, R.A. and W_ster, W., 2009. Coevolution of diet and prey-specific venom activity supports the role of selection in snake venom evolution. Proceedings of the Royal Society of London B: Biological Sciences, 276(1666), pp.2443-2449.	1740.806852	4
Echis_carinatus	Viperidae	72	Boback, S. M. & Guyer, C. A test of reproductive power in snakes. Ecology 89, 1428-1435 (2008)	200	414.1256	21.3	Latifi M. (1984) Variation in yield and lethality of venoms from Iranian snakes. Toxicon, Vol. 22, p 373.; Minton S.A. (1974) Venom Diseases. Ed. Thomas C.C., Springfield, Illinois.	0.64	iv	mammal	Mus_musculus	Theakston, R.D.G. and Reid, H.A., 1983. Development of simple standard assay procedures for the characterization of snake venoms. Bulletin of the world health organization, 61(6), p.949.	0	73	7	7	0	0	13	no	Barlow, A., Pook, C.E., Harrison, R.A. and W_ster, W., 2009. Coevolution of diet and prey-specific venom activity supports the role of selection in snake venom evolution. Proceedings of the Royal Society of London B: Biological Sciences, 276(1666), pp.2443-2449.	1740.806852	4
Echis_carinatus	Viperidae	72	Boback, S. M. & Guyer, C. A test of reproductive power in snakes. Ecology 89, 1428-1435 (2008)	200	414.1256	21.3	Latifi M. (1984) Variation in yield and lethality of venoms from Iranian snakes. Toxicon, Vol. 22, p 373.; Minton S.A. (1974) Venom Diseases. Ed. Thomas C.C., Springfield, Illinois.	0.43	iv	mammal	Mus_musculus	Theakston, R.D.G. and Reid, H.A., 1983. Development of simple standard assay procedures for the characterization of snake venoms. Bulletin of the world health organization, 61(6), p.949.	0	73	7	7	0	0	13	no	Barlow, A., Pook, C.E., Harrison, R.A. and W_ster, W., 2009. Coevolution of diet and prey-specific venom activity supports the role of selection in snake venom evolution. Proceedings of the Royal Society of London B: Biological Sciences, 276(1666), pp.2443-2449.	1740.806852	4
Echis_carinatus	Viperidae	72	Boback, S. M. & Guyer, C. A test of reproductive power in snakes. Ecology 89, 1428-1435 (2008)	200	414.1256	21.3	Latifi M. (1984) Variation in yield and lethality of venoms from Iranian snakes. Toxicon, Vol. 22, p 373.; Minton S.A. (1974) Venom Diseases. Ed. Thomas C.C., Springfield, Illinois.	0.63	iv	mammal	Mus_musculus	Theakston, R.D.G. and Reid, H.A., 1983. Development of simple standard assay procedures for the characterization of snake venoms. Bulletin of the world health organization, 61(6), p.949.	0	73	7	7	0	0	13	no	Barlow, A., Pook, C.E., Harrison, R.A. and W_ster, W., 2009. Coevolution of diet and prey-specific venom activity supports the role of selection in snake venom evolution. Proceedings of the Royal Society of London B: Biological Sciences, 276(1666), pp.2443-2449.	1740.806852	4
Echis_carinatus	Viperidae	72	Boback, S. M. & Guyer, C. A test of reproductive power in snakes. Ecology 89, 1428-1435 (2008)	200	414.1256	21.3	Latifi M. (1984) Variation in yield and lethality of venoms from Iranian snakes. Toxicon, Vol. 22, p 373.; Minton S.A. (1974) Venom Diseases. Ed. Thomas C.C., Springfield, Illinois.	0.74	iv	mammal	Mus_musculus	Theakston, R.D.G. and Reid, H.A., 1983. Development of simple standard assay procedures for the characterization of snake venoms. Bulletin of the world health organization, 61(6), p.949.	0	73	7	7	0	0	13	no	Barlow, A., Pook, C.E., Harrison, R.A. and W_ster, W., 2009. Coevolution of diet and prey-specific venom activity supports the role of selection in snake venom evolution. Proceedings of the Royal Society of London B: Biological Sciences, 276(1666), pp.2443-2449.	1740.806852	4
Echis_carinatus	Viperidae	72	Boback, S. M. & Guyer, C. A test of reproductive power in snakes. Ecology 89, 1428-1435 (2008)	200	414.1256	21.3	Latifi M. (1984) Variation in yield and lethality of venoms from Iranian snakes. Toxicon, Vol. 22, p 373.; Minton S.A. (1974) Venom Diseases. Ed. Thomas C.C., Springfield, Illinois.	0.83	iv	mammal	Mus_musculus	Theakston, R.D.G. and Reid, H.A., 1983. Development of simple standard assay procedures for the characterization of snake venoms. Bulletin of the world health organization, 61(6), p.949.	0	73	7	7	0	0	13	no	Barlow, A., Pook, C.E., Harrison, R.A. and W_ster, W., 2009. Coevolution of diet and prey-specific venom activity supports the role of selection in snake venom evolution. Proceedings of the Royal Society of London B: Biological Sciences, 276(1666), pp.2443-2449.	1740.806852	4
Echis_carinatus	Viperidae	72	Boback, S. M. & Guyer, C. A test of reproductive power in snakes. Ecology 89, 1428-1435 (2008)	200	414.1256	21.3	Latifi M. (1984) Variation in yield and lethality of venoms from Iranian snakes. Toxicon, Vol. 22, p 373.; Minton S.A. (1974) Venom Diseases. Ed. Thomas C.C., Springfield, Illinois.	0.91	iv	mammal	Mus_musculus	Theakston, R.D.G. and Reid, H.A., 1983. Development of simple standard assay procedures for the characterization of snake venoms. Bulletin of the world health organization, 61(6), p.949.	0	73	7	7	0	0	13	no	Barlow, A., Pook, C.E., Harrison, R.A. and W_ster, W., 2009. Coevolution of diet and prey-specific venom activity supports the role of selection in snake venom evolution. Proceedings of the Royal Society of London B: Biological Sciences, 276(1666), pp.2443-2449.	1740.806852	4
Echis_carinatus	Viperidae	72	Boback, S. M. & Guyer, C. A test of reproductive power in snakes. Ecology 89, 1428-1435 (2008)	200	414.1256	21.3	Latifi M. (1984) Variation in yield and lethality of venoms from Iranian snakes. Toxicon, Vol. 22, p 373.; Minton S.A. (1974) Venom Diseases. Ed. Thomas C.C., Springfield, Illinois.	0.94	iv	mammal	Mus_musculus	Theakston, R.D.G. and Reid, H.A., 1983. Development of simple standard assay procedures for the characterization of snake venoms. Bulletin of the world health organization, 61(6), p.949.	0	73	7	7	0	0	13	no	Barlow, A., Pook, C.E., Harrison, R.A. and W_ster, W., 2009. Coevolution of diet and prey-specific venom activity supports the role of selection in snake venom evolution. Proceedings of the Royal Society of London B: Biological Sciences, 276(1666), pp.2443-2449.	1740.806852	4
Echis_carinatus	Viperidae	72	Boback, S. M. & Guyer, C. A test of reproductive power in snakes. Ecology 89, 1428-1435 (2008)	200	414.1256	21.3	Latifi M. (1984) Variation in yield and lethality of venoms from Iranian snakes. Toxicon, Vol. 22, p 373.; Minton S.A. (1974) Venom Diseases. Ed. Thomas C.C., Springfield, Illinois.	1	iv	mammal	Mus_musculus	Theakston, R.D.G. and Reid, H.A., 1983. Development of simple standard assay procedures for the characterization of snake venoms. Bulletin of the world health organization, 61(6), p.949.	0	73	7	7	0	0	13	no	Barlow, A., Pook, C.E., Harrison, R.A. and W_ster, W., 2009. Coevolution of diet and prey-specific venom activity supports the role of selection in snake venom evolution. Proceedings of the Royal Society of London B: Biological Sciences, 276(1666), pp.2443-2449.	1740.806852	4
Echis_carinatus	Viperidae	72	Boback, S. M. & Guyer, C. A test of reproductive power in snakes. Ecology 89, 1428-1435 (2008)	200	414.1256	21.3	Latifi M. (1984) Variation in yield and lethality of venoms from Iranian snakes. Toxicon, Vol. 22, p 373.; Minton S.A. (1974) Venom Diseases. Ed. Thomas C.C., Springfield, Illinois.	2	iv	mammal	Mus_musculus	Theakston, R.D.G. and Reid, H.A., 1983. Development of simple standard assay procedures for the characterization of snake venoms. Bulletin of the world health organization, 61(6), p.949.	0	73	7	7	0	0	13	no	Barlow, A., Pook, C.E., Harrison, R.A. and W_ster, W., 2009. Coevolution of diet and prey-specific venom activity supports the role of selection in snake venom evolution. Proceedings of the Royal Society of London B: Biological Sciences, 276(1666), pp.2443-2449.	1740.806852	4
Echis_carinatus	Viperidae	72	Boback, S. M. & Guyer, C. A test of reproductive power in snakes. Ecology 89, 1428-1435 (2008)	200	414.1256	21.3	Latifi M. (1984) Variation in yield and lethality of venoms from Iranian snakes. Toxicon, Vol. 22, p 373.; Minton S.A. (1974) Venom Diseases. Ed. Thomas C.C., Springfield, Illinois.	3.96	iv	mammal	Mus_musculus	Theakston, R.D.G. and Reid, H.A., 1983. Development of simple standard assay procedures for the characterization of snake venoms. Bulletin of the world health organization, 61(6), p.949.	0	73	7	7	0	0	13	no	Barlow, A., Pook, C.E., Harrison, R.A. and W_ster, W., 2009. Coevolution of diet and prey-specific venom activity supports the role of selection in snake venom evolution. Proceedings of the Royal Society of London B: Biological Sciences, 276(1666), pp.2443-2449.	1740.806852	4
Echis_carinatus	Viperidae	72	Boback, S. M. & Guyer, C. A test of reproductive power in snakes. Ecology 89, 1428-1435 (2008)	200	414.1256	21.3	Latifi M. (1984) Variation in yield and lethality of venoms from Iranian snakes. Toxicon, Vol. 22, p 373.; Minton S.A. (1974) Venom Diseases. Ed. Thomas C.C., Springfield, Illinois.	1.9	ip	mammal	Mus_musculus	Abdel_Aal, A. and Abdel-Baset, A., 2010. Venom yield and toxicities of six Egyptian snakes with a description of a procedure for estimating the amount of venom ejected by a single snake bite. Scientific Journal of King Faisal University (Basic and Applied	0	73	7	7	0	0	13	no	Barlow, A., Pook, C.E., Harrison, R.A. and W_ster, W., 2009. Coevolution of diet and prey-specific venom activity supports the role of selection in snake venom evolution. Proceedings of the Royal Society of London B: Biological Sciences, 276(1666), pp.2443-2449.	1740.806852	4
Echis_carinatus	Viperidae	72	Boback, S. M. & Guyer, C. A test of reproductive power in snakes. Ecology 89, 1428-1435 (2008)	200	414.1256	21.3	Latifi M. (1984) Variation in yield and lethality of venoms from Iranian snakes. Toxicon, Vol. 22, p 373.; Minton S.A. (1974) Venom Diseases. Ed. Thomas C.C., Springfield, Illinois.	0.922	ip	mammal	Mus_musculus	Abdel_Aal, A. and Abdel-Baset, A., 2010. Venom yield and toxicities of six Egyptian snakes with a description of a procedure for estimating the amount of venom ejected by a single snake bite. Scientific Journal of King Faisal University (Basic and Applied	0	73	7	7	0	0	13	no	Barlow, A., Pook, C.E., Harrison, R.A. and W_ster, W., 2009. Coevolution of diet and prey-specific venom activity supports the role of selection in snake venom evolution. Proceedings of the Royal Society of London B: Biological Sciences, 276(1666), pp.2443-2449.	1740.806852	4
Echis_carinatus	Viperidae	72	Boback, S. M. & Guyer, C. A test of reproductive power in snakes. Ecology 89, 1428-1435 (2008)	200	329.797075	21.3	Latifi M. (1984) Variation in yield and lethality of venoms from Iranian snakes. Toxicon, Vol. 22, p 373.; Minton S.A. (1974) Venom Diseases. Ed. Thomas C.C., Springfield, Illinois.	305	ip	artropod	Schistocerca_gregaria	Richards, D. P., A. Barlow, and Wolfgang W_ster. "Venom lethality and diet: differential responses of natural prey and model organisms to the venom of the saw-scaled vipers (Echis)." Toxicon 59.1 (2012): 110-116.	0	73	7	7	0	0	13	no	Barlow, A., Pook, C.E., Harrison, R.A. and W_ster, W., 2009. Coevolution of diet and prey-specific venom activity supports the role of selection in snake venom evolution. Proceedings of the Royal Society of London B: Biological Sciences, 276(1666), pp.2443-2449.	1740.806852	4
Echis_carinatus	Viperidae	72	Boback, S. M. & Guyer, C. A test of reproductive power in snakes. Ecology 89, 1428-1435 (2008)	200	157.827075	21.3	Latifi M. (1984) Variation in yield and lethality of venoms from Iranian snakes. Toxicon, Vol. 22, p 373.; Minton S.A. (1974) Venom Diseases. Ed. Thomas C.C., Springfield, Illinois.	10	ip	artropod	Scorpio_maurus	Barlow, Axel, et al. "Coevolution of diet and prey-specific venom activity supports the role of selection in snake venom evolution." Proceedings of the Royal Society of London B: Biological Sciences 276.1666 (2009): 2443-2449	0	73	7	7	0	0	13	no	Barlow, A., Pook, C.E., Harrison, R.A. and W_ster, W., 2009. Coevolution of diet and prey-specific venom activity supports the role of selection in snake venom evolution. Proceedings of the Royal Society of London B: Biological Sciences, 276(1666), pp.2443-2449.	1740.806852	4
Emydocephalus_annulatus	Elapidae	105	Rasmussen, A.R., 2001. Sea snakes. FAO species identification guide for fishery purposes. The living marine resources of the Western Central Pacific, 6, pp.3987-4008.	271	419	0.15	Minton S.A. (1983) Lethal toxicity of venoms of snakes from the Coral Sea. Toxicon, Vol. 21, No. 6, pp 901-902.	25	sc	mammal	Mus_musculus	Minton 1983. Lethal Toxicity of venoms of snakes from the coral sea Toxicon 21:901	0	0	0	0	0	100	0	yes	Voris, H.K. and Voris, H.H., 1983. Feeding strategies in marine snakes: an analysis of evolutionary, morphological, behavioral and ecological relationships. American Zoologist, 23(2), pp.411-425.	0	1
Enhydrina_schistosa	Elapidae	158	Boback, S. M. & Guyer, C. A test of reproductive power in snakes. Ecology 89, 1428-1435 (2008)	759	452.0789472	10.6	Minton S.A. (1974) Venom Diseases. Ed. Thomas C.C., Springfield, Illinois.; Reid H.A. (1975) Epidemiology and clinical aspects of sea snakebites. In : The Biology of Sea Snakes. Ed. Dunson W.A., University Park Press, Baltimore, pp 417-462. ; Brown J.H. (1973) Toxicology and pharmacology of venoms from poisonous snakes. Ed. Thomas C.C., Springfield, Illinois. p 184.; U.S. Department of the Navy (…	0.1	iv	mammal	Mus_musculus	Baxter and Heather 1976.	100	0	0	0	0	0	0	no	Glodek, G. S. and Voris, H. K., 1982. Marine snake diets: prey composition, diversity and overlap. Copeia. 1982(3): 661-66.	1267.42154	6
Enhydrina_schistosa	Elapidae	158	Boback, S. M. & Guyer, C. A test of reproductive power in snakes. Ecology 89, 1428-1435 (2008)	759	452.0789472	10.6	Minton S.A. (1974) Venom Diseases. Ed. Thomas C.C., Springfield, Illinois.; Reid H.A. (1975) Epidemiology and clinical aspects of sea snakebites. In : The Biology of Sea Snakes. Ed. Dunson W.A., University Park Press, Baltimore, pp 417-462. ; Brown J.H. (1973) Toxicology and pharmacology of venoms from poisonous snakes. Ed. Thomas C.C., Springfield, Illinois. p 184.; U.S. Department of the Navy (…	0.12	sc	mammal	Mus_musculus	Baxter and Heather 1976.	100	0	0	0	0	0	0	no	Glodek, G. S. and Voris, H. K., 1982. Marine snake diets: prey composition, diversity and overlap. Copeia. 1982(3): 661-66.	1267.42154	6
Enhydrina_schistosa	Elapidae	158	Boback, S. M. & Guyer, C. A test of reproductive power in snakes. Ecology 89, 1428-1435 (2008)	759	452.0789472	10.6	Minton S.A. (1974) Venom Diseases. Ed. Thomas C.C., Springfield, Illinois.; Reid H.A. (1975) Epidemiology and clinical aspects of sea snakebites. In : The Biology of Sea Snakes. Ed. Dunson W.A., University Park Press, Baltimore, pp 417-462. ; Brown J.H. (1973) Toxicology and pharmacology of venoms from poisonous snakes. Ed. Thomas C.C., Springfield, Illinois. p 184.; U.S. Department of the Navy (…	0.164	sc	mammal	Mus_musculus	Broad, A. J., Sutherland, S. K., Coulter, A.R. (1979). The lethality in mice of dangerous Australian and other snake venoms. Toxicon (17). 664-667. 11.	100	0	0	0	0	0	0	no	Glodek, G. S. and Voris, H. K., 1982. Marine snake diets: prey composition, diversity and overlap. Copeia. 1982(3): 661-66.	1267.42154	6
Enhydrina_schistosa	Elapidae	158	Boback, S. M. & Guyer, C. A test of reproductive power in snakes. Ecology 89, 1428-1435 (2008)	759	452.0789472	10.6	Minton S.A. (1974) Venom Diseases. Ed. Thomas C.C., Springfield, Illinois.; Reid H.A. (1975) Epidemiology and clinical aspects of sea snakebites. In : The Biology of Sea Snakes. Ed. Dunson W.A., University Park Press, Baltimore, pp 417-462. ; Brown J.H. (1973) Toxicology and pharmacology of venoms from poisonous snakes. Ed. Thomas C.C., Springfield, Illinois. p 184.; U.S. Department of the Navy (…	0.117	ip	mammal	Mus_musculus	Carey and Wright 1960	100	0	0	0	0	0	0	no	Glodek, G. S. and Voris, H. K., 1982. Marine snake diets: prey composition, diversity and overlap. Copeia. 1982(3): 661-66.	1267.42154	6
Enhydrina_schistosa	Elapidae	158	Boback, S. M. & Guyer, C. A test of reproductive power in snakes. Ecology 89, 1428-1435 (2008)	759	452.0789472	10.6	Minton S.A. (1974) Venom Diseases. Ed. Thomas C.C., Springfield, Illinois.; Reid H.A. (1975) Epidemiology and clinical aspects of sea snakebites. In : The Biology of Sea Snakes. Ed. Dunson W.A., University Park Press, Baltimore, pp 417-462. ; Brown J.H. (1973) Toxicology and pharmacology of venoms from poisonous snakes. Ed. Thomas C.C., Springfield, Illinois. p 184.; U.S. Department of the Navy (…	0.115	iv	mammal	Mus_musculus	Barme 1968 venamous sea snakes	100	0	0	0	0	0	0	no	Glodek, G. S. and Voris, H. K., 1982. Marine snake diets: prey composition, diversity and overlap. Copeia. 1982(3): 661-66.	1267.42154	6
Enhydrina_schistosa	Elapidae	158	Boback, S. M. & Guyer, C. A test of reproductive power in snakes. Ecology 89, 1428-1435 (2008)	759	452.0789472	10.6	Minton S.A. (1974) Venom Diseases. Ed. Thomas C.C., Springfield, Illinois.; Reid H.A. (1975) Epidemiology and clinical aspects of sea snakebites. In : The Biology of Sea Snakes. Ed. Dunson W.A., University Park Press, Baltimore, pp 417-462. ; Brown J.H. (1973) Toxicology and pharmacology of venoms from poisonous snakes. Ed. Thomas C.C., Springfield, Illinois. p 184.; U.S. Department of the Navy (…	0.098	iv	mammal	Mus_musculus	Tu and Toom 1971	100	0	0	0	0	0	0	no	Glodek, G. S. and Voris, H. K., 1982. Marine snake diets: prey composition, diversity and overlap. Copeia. 1982(3): 661-66.	1267.42154	6
Enhydrina_schistosa	Elapidae	158	Boback, S. M. & Guyer, C. A test of reproductive power in snakes. Ecology 89, 1428-1435 (2008)	759	452.0789472	10.6	Minton S.A. (1974) Venom Diseases. Ed. Thomas C.C., Springfield, Illinois.; Reid H.A. (1975) Epidemiology and clinical aspects of sea snakebites. In : The Biology of Sea Snakes. Ed. Dunson W.A., University Park Press, Baltimore, pp 417-462. ; Brown J.H. (1973) Toxicology and pharmacology of venoms from poisonous snakes. Ed. Thomas C.C., Springfield, Illinois. p 184.; U.S. Department of the Navy (…	0.35	iv	mammal	Mus_musculus	Cheymol et al 1967	100	0	0	0	0	0	0	no	Glodek, G. S. and Voris, H. K., 1982. Marine snake diets: prey composition, diversity and overlap. Copeia. 1982(3): 661-66.	1267.42154	6
Enhydrina_schistosa	Elapidae	158	Boback, S. M. & Guyer, C. A test of reproductive power in snakes. Ecology 89, 1428-1435 (2008)	759	452.0789472	10.6	Minton S.A. (1974) Venom Diseases. Ed. Thomas C.C., Springfield, Illinois.; Reid H.A. (1975) Epidemiology and clinical aspects of sea snakebites. In : The Biology of Sea Snakes. Ed. Dunson W.A., University Park Press, Baltimore, pp 417-462. ; Brown J.H. (1973) Toxicology and pharmacology of venoms from poisonous snakes. Ed. Thomas C.C., Springfield, Illinois. p 184.; U.S. Department of the Navy (…	0.15	sc	mammal	Mus_musculus	Minton, S.A., 1968. Preliminary observations on the venom of Wagler's pit viper (Trimeresurus wagleri). Toxicon, 6(2), pp.93IN197-96IN2.	100	0	0	0	0	0	0	no	Glodek, G. S. and Voris, H. K., 1982. Marine snake diets: prey composition, diversity and overlap. Copeia. 1982(3): 661-66.	1267.42154	6
Hemachatus_haemachatus	Elapidae	150	Branch, W. R. Field guide to snakes and other reptiles of southern Africa. (Struik, 1998).	670	330.0262295	100	Minton S.A. (1974) Venom Diseases. Ed. Thomas C.C., Springfield, Illinois.	1.6	ip	mammal	Mus_musculus	Kabara, J.J. and Fischer, G., 1972. Methodology for the isolation of low molecular weight toxins from snake venoms. Toxicon, 10(3), pp.227-238.	0	0	80	5	2	0	13	no	Shine, R., Branch, W.R., Webb, J.K., Harlow, P.S., Shine, T. and Keogh, J.S., 2007. Ecology of cobras from southern Africa. Journal of Zoology, 272(2), pp.183-193.	1502.006975	4
Hemachatus_haemachatus	Elapidae	150	Branch, W. R. Field guide to snakes and other reptiles of southern Africa. (Struik, 1998).	670	330.0262295	100	Minton S.A. (1974) Venom Diseases. Ed. Thomas C.C., Springfield, Illinois.	1.1	iv	mammal	Mus_musculus	Handbook of Natural Toxins: Reptile Venoms and Toxins	0	0	80	5	2	0	13	no	Shine, R., Branch, W.R., Webb, J.K., Harlow, P.S., Shine, T. and Keogh, J.S., 2007. Ecology of cobras from southern Africa. Journal of Zoology, 272(2), pp.183-193.	1502.006975	4
Hemachatus_haemachatus	Elapidae	150	Branch, W. R. Field guide to snakes and other reptiles of southern Africa. (Struik, 1998).	670	330.0262295	100	Minton S.A. (1974) Venom Diseases. Ed. Thomas C.C., Springfield, Illinois.	2.625	sc	mammal	Mus_musculus	Minton, S.A., 1968. Preliminary observations on the venom of Wagler's pit viper (Trimeresurus wagleri). Toxicon, 6(2), pp.93IN197-96IN2.	0	0	80	5	2	0	13	no	Shine, R., Branch, W.R., Webb, J.K., Harlow, P.S., Shine, T. and Keogh, J.S., 2007. Ecology of cobras from southern Africa. Journal of Zoology, 272(2), pp.183-193.	1502.006975	4
Hemachatus_haemachatus	Elapidae	150	Branch, W. R. Field guide to snakes and other reptiles of southern Africa. (Struik, 1998).	670	330.0262295	100	Minton S.A. (1974) Venom Diseases. Ed. Thomas C.C., Springfield, Illinois.	1.55	sc	mammal	Rattus_norvegicus	Fraser, T. R. and J. A. Gunn (1909), Phil. Trans. Roy. Soc. (London), B200:241.	0	0	80	5	2	0	13	no	Shine, R., Branch, W.R., Webb, J.K., Harlow, P.S., Shine, T. and Keogh, J.S., 2007. Ecology of cobras from southern Africa. Journal of Zoology, 272(2), pp.183-193.	1502.006975	4
Hemachatus_haemachatus	Elapidae	150	Branch, W. R. Field guide to snakes and other reptiles of southern Africa. (Struik, 1998).	670	330.0262295	100	Minton S.A. (1974) Venom Diseases. Ed. Thomas C.C., Springfield, Illinois.	0.8	sc	mammal	Oryctolagus_cuniculus	Fraser, T. R. and J. A. Gunn (1909), Phil. Trans. Roy. Soc. (London), B200:241.	0	0	80	5	2	0	13	no	Shine, R., Branch, W.R., Webb, J.K., Harlow, P.S., Shine, T. and Keogh, J.S., 2007. Ecology of cobras from southern Africa. Journal of Zoology, 272(2), pp.183-193.	1502.006975	4
Hemachatus_haemachatus	Elapidae	150	Branch, W. R. Field guide to snakes and other reptiles of southern Africa. (Struik, 1998).	670	330.0262295	100	Minton S.A. (1974) Venom Diseases. Ed. Thomas C.C., Springfield, Illinois.	0.51	iv	mammal	Oryctolagus_cuniculus	Fraser, T. R. and J. A. Gunn (1909), Phil. Trans. Roy. Soc. (London), B200:241.	0	0	80	5	2	0	13	no	Shine, R., Branch, W.R., Webb, J.K., Harlow, P.S., Shine, T. and Keogh, J.S., 2007. Ecology of cobras from southern Africa. Journal of Zoology, 272(2), pp.183-193.	1502.006975	4
Hemachatus_haemachatus	Elapidae	150	Branch, W. R. Field guide to snakes and other reptiles of southern Africa. (Struik, 1998).	670	330.0262295	100	Minton S.A. (1974) Venom Diseases. Ed. Thomas C.C., Springfield, Illinois.	12.5	sc	mammal	Felis_silvestris	Fraser, T. R. and J. A. Gunn (1909), Phil. Trans. Roy. Soc. (London), B200:241.	0	0	80	5	2	0	13	no	Shine, R., Branch, W.R., Webb, J.K., Harlow, P.S., Shine, T. and Keogh, J.S., 2007. Ecology of cobras from southern Africa. Journal of Zoology, 272(2), pp.183-193.	1502.006975	4
Hemachatus_haemachatus	Elapidae	150	Branch, W. R. Field guide to snakes and other reptiles of southern Africa. (Struik, 1998).	670	345.9963114	100	Minton S.A. (1974) Venom Diseases. Ed. Thomas C.C., Springfield, Illinois.	3.15	sc	bird	Columba_sp	Fraser, T. R. and J. A. Gunn (1909), Phil. Trans. Roy. Soc. (London), B200:241.	0	0	80	5	2	0	13	no	Shine, R., Branch, W.R., Webb, J.K., Harlow, P.S., Shine, T. and Keogh, J.S., 2007. Ecology of cobras from southern Africa. Journal of Zoology, 272(2), pp.183-193.	1502.006975	4
Hemachatus_haemachatus	Elapidae	150	Branch, W. R. Field guide to snakes and other reptiles of southern Africa. (Struik, 1998).	670	316.3508197	100	Minton S.A. (1974) Venom Diseases. Ed. Thomas C.C., Springfield, Illinois.	1	sc	amphibian	Rana_temporaria	Fraser, T. R. and J. A. Gunn (1909), Phil. Trans. Roy. Soc. (London), B200:241.	0	0	80	5	2	0	13	no	Shine, R., Branch, W.R., Webb, J.K., Harlow, P.S., Shine, T. and Keogh, J.S., 2007. Ecology of cobras from southern Africa. Journal of Zoology, 272(2), pp.183-193.	1502.006975	4
Hemachatus_haemachatus	Elapidae	150	Branch, W. R. Field guide to snakes and other reptiles of southern Africa. (Struik, 1998).	670	330.0262295	100	Minton S.A. (1974) Venom Diseases. Ed. Thomas C.C., Springfield, Illinois.	1.71	iv	mammal	Mus_musculus	Christensen 1979	0	0	80	5	2	0	13	no	Shine, R., Branch, W.R., Webb, J.K., Harlow, P.S., Shine, T. and Keogh, J.S., 2007. Ecology of cobras from southern Africa. Journal of Zoology, 272(2), pp.183-193.	1502.006975	4
Hemachatus_haemachatus	Elapidae	150	Branch, W. R. Field guide to snakes and other reptiles of southern Africa. (Struik, 1998).	670	330.0262295	100	Minton S.A. (1974) Venom Diseases. Ed. Thomas C.C., Springfield, Illinois.	1.77	sc	mammal	Mus_musculus	Christensen 1979	0	0	80	5	2	0	13	no	Shine, R., Branch, W.R., Webb, J.K., Harlow, P.S., Shine, T. and Keogh, J.S., 2007. Ecology of cobras from southern Africa. Journal of Zoology, 272(2), pp.183-193.	1502.006975	4
Hydrodynastes_gigas	Dipsadidae	300	L_pez, M.S. and Giraudo, A.R., 2004. Diet of the large water snakeHydrodynastes gigas (Colubridae) from northeast Argentina. Amphibia Reptilia, 25(2), pp.178-184.	1724	348.3528226	7.31	Hill, R.E. and Mackessy, S.P., 2000. Characterization of venom (Duvernoy�s secretion) from twelve species of colubrid snakes and partial sequence of four venom proteins. Toxicon, 38(12), pp.1663-1687.	2	ip	mammal	Mus_musculus	Mackessy, S.P., 2002. Biochemistry and pharmacology of colubrid snake venoms. Journal of Toxicology: Toxin Reviews, 21(1-2), pp.43-83.	16	23	23	19	0	3	16	yes	L_pez, M.S. and Giraudo, A.R., 2004. Diet of the large water snakeHydrodynastes gigas (Colubridae) from northeast Argentina. Amphibia Reptilia, 25(2), pp.178-184.	2718.657504	16
Hydrophis_cyanocinctus	Elapidae	275	Rasmussen, A.R., 2001. Sea snakes. FAO species identification guide for fishery purposes. The living marine resources of the Western Central Pacific, 6, pp.3987-4008.	2881	419.0000004	7.6	Minton S.A. (1974) Venom Diseases. Ed. Thomas C.C., Springfield, Illinois. Reid H.A. (1975) Epidemiology and clinical aspects of sea snakebites. In : The Biology of Sea Snakes. Ed. Dunson W.A., University Park Press, Baltimore, pp 417-462.	0.29	iv	mammal	Mus_musculus	Baxter and Gallichio 1976.	100	0	0	0	0	0	0	no	Voris, H.K. and Voris, H.H., 1983. Feeding strategies in marine snakes: an analysis of evolutionary, morphological, behavioral and ecological relationships. American Zoologist, 23(2), pp.411-425.	861.164712	3
Hydrophis_cyanocinctus	Elapidae	275	Rasmussen, A.R., 2001. Sea snakes. FAO species identification guide for fishery purposes. The living marine resources of the Western Central Pacific, 6, pp.3987-4008.	2881	419.0000004	7.6	Minton S.A. (1974) Venom Diseases. Ed. Thomas C.C., Springfield, Illinois. Reid H.A. (1975) Epidemiology and clinical aspects of sea snakebites. In : The Biology of Sea Snakes. Ed. Dunson W.A., University Park Press, Baltimore, pp 417-462.	0.5	sc	mammal	Mus_musculus	Baxter and Gallichio 1976.	100	0	0	0	0	0	0	no	Voris, H.K. and Voris, H.H., 1983. Feeding strategies in marine snakes: an analysis of evolutionary, morphological, behavioral and ecological relationships. American Zoologist, 23(2), pp.411-425.	861.164712	3
Hydrophis_cyanocinctus	Elapidae	275	Rasmussen, A.R., 2001. Sea snakes. FAO species identification guide for fishery purposes. The living marine resources of the Western Central Pacific, 6, pp.3987-4008.	2881	419.0000004	7.6	Minton S.A. (1974) Venom Diseases. Ed. Thomas C.C., Springfield, Illinois. Reid H.A. (1975) Epidemiology and clinical aspects of sea snakebites. In : The Biology of Sea Snakes. Ed. Dunson W.A., University Park Press, Baltimore, pp 417-462.	0.35	iv	mammal	Mus_musculus	Mackessy, S.P. and Tu, A.T., 1993. Biology of the sea snakes and biochemistry of their venoms. Toxin-related Diseases: Poisons Originating from Plants, Animals and Spoilage. New Delhi: Oxford & IBH Publishing Co, pp.305-51.	100	0	0	0	0	0	0	no	Voris, H.K. and Voris, H.H., 1983. Feeding strategies in marine snakes: an analysis of evolutionary, morphological, behavioral and ecological relationships. American Zoologist, 23(2), pp.411-425.	861.164712	3
Hydrophis_cyanocinctus	Elapidae	275	Rasmussen, A.R., 2001. Sea snakes. FAO species identification guide for fishery purposes. The living marine resources of the Western Central Pacific, 6, pp.3987-4008.	2881	419.0000004	7.6	Minton S.A. (1974) Venom Diseases. Ed. Thomas C.C., Springfield, Illinois. Reid H.A. (1975) Epidemiology and clinical aspects of sea snakebites. In : The Biology of Sea Snakes. Ed. Dunson W.A., University Park Press, Baltimore, pp 417-462.	0.57	iv	mammal	Mus_musculus	Mackessy, S.P. and Tu, A.T., 1993. Biology of the sea snakes and biochemistry of their venoms. Toxin-related Diseases: Poisons Originating from Plants, Animals and Spoilage. New Delhi: Oxford & IBH Publishing Co, pp.305-51.	100	0	0	0	0	0	0	no	Voris, H.K. and Voris, H.H., 1983. Feeding strategies in marine snakes: an analysis of evolutionary, morphological, behavioral and ecological relationships. American Zoologist, 23(2), pp.411-425.	861.164712	3
Hydrophis_cyanocinctus	Elapidae	275	Rasmussen, A.R., 2001. Sea snakes. FAO species identification guide for fishery purposes. The living marine resources of the Western Central Pacific, 6, pp.3987-4008.	2881	419.0000004	7.6	Minton S.A. (1974) Venom Diseases. Ed. Thomas C.C., Springfield, Illinois. Reid H.A. (1975) Epidemiology and clinical aspects of sea snakebites. In : The Biology of Sea Snakes. Ed. Dunson W.A., University Park Press, Baltimore, pp 417-462.	0.665	iv	mammal	Mus_musculus	Cheymol et al 1967	100	0	0	0	0	0	0	no	Voris, H.K. and Voris, H.H., 1983. Feeding strategies in marine snakes: an analysis of evolutionary, morphological, behavioral and ecological relationships. American Zoologist, 23(2), pp.411-425.	861.164712	3
Hydrophis_cyanocinctus	Elapidae	275	Rasmussen, A.R., 2001. Sea snakes. FAO species identification guide for fishery purposes. The living marine resources of the Western Central Pacific, 6, pp.3987-4008.	2881	419.0000004	7.6	Minton S.A. (1974) Venom Diseases. Ed. Thomas C.C., Springfield, Illinois. Reid H.A. (1975) Epidemiology and clinical aspects of sea snakebites. In : The Biology of Sea Snakes. Ed. Dunson W.A., University Park Press, Baltimore, pp 417-462.	0.53	sc	mammal	Mus_musculus	Mackessy, S.P. and Tu, A.T., 1993. Biology of the sea snakes and biochemistry of their venoms. Toxin-related Diseases: Poisons Originating from Plants, Animals and Spoilage. New Delhi: Oxford & IBH Publishing Co, pp.305-51.	100	0	0	0	0	0	0	no	Voris, H.K. and Voris, H.H., 1983. Feeding strategies in marine snakes: an analysis of evolutionary, morphological, behavioral and ecological relationships. American Zoologist, 23(2), pp.411-425.	861.164712	3
Hydrophis_cyanocinctus	Elapidae	275	Rasmussen, A.R., 2001. Sea snakes. FAO species identification guide for fishery purposes. The living marine resources of the Western Central Pacific, 6, pp.3987-4008.	2881	419.0000004	7.6	Minton S.A. (1974) Venom Diseases. Ed. Thomas C.C., Springfield, Illinois. Reid H.A. (1975) Epidemiology and clinical aspects of sea snakebites. In : The Biology of Sea Snakes. Ed. Dunson W.A., University Park Press, Baltimore, pp 417-462.	0.241	ip	mammal	Mus_musculus	Carey and Wright 1960	100	0	0	0	0	0	0	no	Voris, H.K. and Voris, H.H., 1983. Feeding strategies in marine snakes: an analysis of evolutionary, morphological, behavioral and ecological relationships. American Zoologist, 23(2), pp.411-425.	861.164712	3
Hydrophis_elegans	Elapidae	210	Boback, S. M. & Guyer, C. A test of reproductive power in snakes. Ecology 89, 1428-1435 (2008)	1505	391.0666665	7.2	Heatwole H. (1999) Sea Snakes. Australian Natural History Series. University of NSW Press Ltd., Sydney.; Tamiya N. and Puffer H. (1974) Lethality of sea snake venoms. Toxicon, Vol. 12, pp 85.; Limpus C. J. (1978) The venom apparatus and venom yields of subtropical Queensland Hydrophiidae. In : Eds. Rosenberg P. Toxins : Animal, Plant and Microbial. Pergamon Press, Oxford, pp 341-363.; Limpus C. J…	0.26	iv	mammal	Mus_musculus	Baxter and Gallichio 1976.	100	0	0	0	0	0	0	no	Voris, H.K. and Voris, H.H., 1983. Feeding strategies in marine snakes: an analysis of evolutionary, morphological, behavioral and ecological relationships. American Zoologist, 23(2), pp.411-425.	1038.641947	4
Hydrophis_elegans	Elapidae	210	Boback, S. M. & Guyer, C. A test of reproductive power in snakes. Ecology 89, 1428-1435 (2008)	1505	391.0666665	7.2	Heatwole H. (1999) Sea Snakes. Australian Natural History Series. University of NSW Press Ltd., Sydney.; Tamiya N. and Puffer H. (1974) Lethality of sea snake venoms. Toxicon, Vol. 12, pp 85.; Limpus C. J. (1978) The venom apparatus and venom yields of subtropical Queensland Hydrophiidae. In : Eds. Rosenberg P. Toxins : Animal, Plant and Microbial. Pergamon Press, Oxford, pp 341-363.; Limpus C. J…	0.28	sc	mammal	Mus_musculus	Baxter and Gallichio 1976.	100	0	0	0	0	0	0	no	Voris, H.K. and Voris, H.H., 1983. Feeding strategies in marine snakes: an analysis of evolutionary, morphological, behavioral and ecological relationships. American Zoologist, 23(2), pp.411-425.	1038.641947	4
Hydrophis_ornatus	Elapidae	120	Boback, S. M. & Guyer, C. A test of reproductive power in snakes. Ecology 89, 1428-1435 (2008)	391	419	8.3	Tamiya N. and Puffer H. (1974) Lethality of sea snake venoms. Toxicon, Vol. 12, pp 85.	2.2	iv	mammal	Mus_musculus	Tu 1974 Sea Snake Investigation in the Gulf of Thailand	100	0	0	0	0	0	0	no	Voris, H.K. and Voris, H.H., 1983. Feeding strategies in marine snakes: an analysis of evolutionary, morphological, behavioral and ecological relationships. American Zoologist, 23(2), pp.411-425.	733.977232	2
Hydrophis_spiralis	Elapidae	275	Rasmussen, A.R., 2001. Sea snakes. FAO species identification guide for fishery purposes. The living marine resources of the Western Central Pacific, 6, pp.3987-4008.	2881	419	2.1	Reid H.A. (1975) Epidemiology and clinical aspects of sea snakebites. In : The Biology of Sea Snakes. Ed. Dunson W.A., University Park Press, Baltimore, pp 417-462.	0.415	ip	mammal	Mus_musculus	Carey and Wright 1960	100	0	0	0	0	0	0	no	Voris, H.K. and Voris, H.H., 1983. Feeding strategies in marine snakes: an analysis of evolutionary, morphological, behavioral and ecological relationships. American Zoologist, 23(2), pp.411-425.	0	1
Hypsiglena_torquata	Dipsadidae	65	Boback, S. M. & Guyer, C. A test of reproductive power in snakes. Ecology 89, 1428-1435 (2008)	48	325.6518206	1.05	Hill, R.E. and Mackessy, S.P., 2000. Characterization of venom (Duvernoy�s secretion) from twelve species of colubrid snakes and partial sequence of four venom proteins. Toxicon, 38(12), pp.1663-1687.	26	sc	mammal	Mus_musculus	Vest 198	0	2.2	10.1	66.2	0	21.5	0	yes	Grundler, M.C. and Rabosky, D.L., 2014. Trophic divergence despite morphological convergence in a continental radiation of snakes. Proceedings of the Royal Society of London B: Biological Sciences, 281(1787), p.20140413.	3363.768931	26
Lapemis_curtus	Elapidae	150	Boback, S. M. & Guyer, C. A test of reproductive power in snakes. Ecology 89, 1428-1435 (2008)	670	352.6583318	3.8	Reid H.A. (1975) Epidemiology and clinical aspects of sea snakebites. In : The Biology of Sea Snakes. Ed. Dunson W.A., University Park Press, Baltimore, pp 417-462.	0.44	iv	mammal	Mus_musculus	Cheymol et al 1967	93	7	0	0	0	0	0	no	da Silva, N.J. and Aird, S.D., 2001. Prey specificity, comparative lethality and compositional differences of coral snake venoms. Comparative Biochemistry and Physiology Part C: Toxicology & Pharmacology, 128(3), pp.425-456.; da Silva, N.J. and Aird, S.D., 2001. Prey specificity, comparative lethality and compositional differences of coral snake venoms. Comparative Biochemistry and Physiology Par…	3265.766898	23
Lapemis_curtus	Elapidae	150	Boback, S. M. & Guyer, C. A test of reproductive power in snakes. Ecology 89, 1428-1435 (2008)	670	352.6583318	3.8	Reid H.A. (1975) Epidemiology and clinical aspects of sea snakebites. In : The Biology of Sea Snakes. Ed. Dunson W.A., University Park Press, Baltimore, pp 417-462.	1.16	iv	mammal	Mus_musculus	Mackessy, S.P. and Tu, A.T., 1993. Biology of the sea snakes and biochemistry of their venoms. Toxin-related Diseases: Poisons Originating from Plants, Animals and Spoilage. New Delhi: Oxford & IBH Publishing Co, pp.305-51.	93	7	0	0	0	0	0	no	da Silva, N.J. and Aird, S.D., 2001. Prey specificity, comparative lethality and compositional differences of coral snake venoms. Comparative Biochemistry and Physiology Part C: Toxicology & Pharmacology, 128(3), pp.425-456.; da Silva, N.J. and Aird, S.D., 2001. Prey specificity, comparative lethality and compositional differences of coral snake venoms. Comparative Biochemistry and Physiology Par…	3265.766898	23
Lapemis_curtus	Elapidae	150	Boback, S. M. & Guyer, C. A test of reproductive power in snakes. Ecology 89, 1428-1435 (2008)	670	352.6583318	3.8	Reid H.A. (1975) Epidemiology and clinical aspects of sea snakebites. In : The Biology of Sea Snakes. Ed. Dunson W.A., University Park Press, Baltimore, pp 417-462.	1.4	iv	mammal	Mus_musculus	Tu and Hong 1971	93	7	0	0	0	0	0	no	da Silva, N.J. and Aird, S.D., 2001. Prey specificity, comparative lethality and compositional differences of coral snake venoms. Comparative Biochemistry and Physiology Part C: Toxicology & Pharmacology, 128(3), pp.425-456.; da Silva, N.J. and Aird, S.D., 2001. Prey specificity, comparative lethality and compositional differences of coral snake venoms. Comparative Biochemistry and Physiology Par…	3265.766898	23
Lapemis_curtus	Elapidae	150	Boback, S. M. & Guyer, C. A test of reproductive power in snakes. Ecology 89, 1428-1435 (2008)	670	352.6583318	3.8	Reid H.A. (1975) Epidemiology and clinical aspects of sea snakebites. In : The Biology of Sea Snakes. Ed. Dunson W.A., University Park Press, Baltimore, pp 417-462.	0.264	ip	mammal	Mus_musculus	Carey and Wright 1960	93	7	0	0	0	0	0	no	da Silva, N.J. and Aird, S.D., 2001. Prey specificity, comparative lethality and compositional differences of coral snake venoms. Comparative Biochemistry and Physiology Part C: Toxicology & Pharmacology, 128(3), pp.425-456.; da Silva, N.J. and Aird, S.D., 2001. Prey specificity, comparative lethality and compositional differences of coral snake venoms. Comparative Biochemistry and Physiology Par…	3265.766898	23
Lapemis_curtus	Elapidae	150	Boback, S. M. & Guyer, C. A test of reproductive power in snakes. Ecology 89, 1428-1435 (2008)	670	352.6583318	3.8	Reid H.A. (1975) Epidemiology and clinical aspects of sea snakebites. In : The Biology of Sea Snakes. Ed. Dunson W.A., University Park Press, Baltimore, pp 417-462.	0.71	ip	mammal	Mus_musculus	Mackessy, S.P. and Tu, A.T., 1993. Biology of the sea snakes and biochemistry of their venoms. Toxin-related Diseases: Poisons Originating from Plants, Animals and Spoilage. New Delhi: Oxford & IBH Publishing Co, pp.305-51.	93	7	0	0	0	0	0	no	da Silva, N.J. and Aird, S.D., 2001. Prey specificity, comparative lethality and compositional differences of coral snake venoms. Comparative Biochemistry and Physiology Part C: Toxicology & Pharmacology, 128(3), pp.425-456.; da Silva, N.J. and Aird, S.D., 2001. Prey specificity, comparative lethality and compositional differences of coral snake venoms. Comparative Biochemistry and Physiology Par…	3265.766898	23
Laticauda_colubrina	Elapidae	150	Boback, S. M. & Guyer, C. A test of reproductive power in snakes. Ecology 89, 1428-1435 (2008)	670	419.0000004	10.6	Singh Y.N. and Guinea M.L. (1984) Yield and toxicity studies on the venom of the common Fijian sea snake, Laticauda colubrina ( Schneider ). South Pacific J. Nat. Sci., Vol. 5, pp 71-92.	0.4	iv	mammal	Mus_musculus	Mackessy, S.P. and Tu, A.T., 1993. Biology of the sea snakes and biochemistry of their venoms. Toxin-related Diseases: Poisons Originating from Plants, Animals and Spoilage. New Delhi: Oxford & IBH Publishing Co, pp.305-51.	100	0	0	0	0	0	0	no	Voris, H.K. and Voris, H.H., 1983. Feeding strategies in marine snakes: an analysis of evolutionary, morphological, behavioral and ecological relationships. American Zoologist, 23(2), pp.411-425.	1112.925216	5
Laticauda_colubrina	Elapidae	150	Boback, S. M. & Guyer, C. A test of reproductive power in snakes. Ecology 89, 1428-1435 (2008)	670	419.0000004	10.6	Singh Y.N. and Guinea M.L. (1984) Yield and toxicity studies on the venom of the common Fijian sea snake, Laticauda colubrina ( Schneider ). South Pacific J. Nat. Sci., Vol. 5, pp 71-92.	0.45	sc	mammal	Mus_musculus	Levey 1969	100	0	0	0	0	0	0	no	Voris, H.K. and Voris, H.H., 1983. Feeding strategies in marine snakes: an analysis of evolutionary, morphological, behavioral and ecological relationships. American Zoologist, 23(2), pp.411-425.	1112.925216	5
Laticauda_colubrina	Elapidae	150	Boback, S. M. & Guyer, C. A test of reproductive power in snakes. Ecology 89, 1428-1435 (2008)	670	419.0000004	10.6	Singh Y.N. and Guinea M.L. (1984) Yield and toxicity studies on the venom of the common Fijian sea snake, Laticauda colubrina ( Schneider ). South Pacific J. Nat. Sci., Vol. 5, pp 71-92.	0.42	sc	mammal	Mus_musculus	Handbook of Natural Toxins: Reptile Venoms and Toxins	100	0	0	0	0	0	0	no	Voris, H.K. and Voris, H.H., 1983. Feeding strategies in marine snakes: an analysis of evolutionary, morphological, behavioral and ecological relationships. American Zoologist, 23(2), pp.411-425.	1112.925216	5
Micrurus_altirostris	Elapidae	131	Boback, S. M. & Guyer, C. A test of reproductive power in snakes. Ecology 89, 1428-1435 (2008)	483	316.35	9	Roze J.A. (1996) Coral snakes of the Americas. Biology, identification, and venoms. Krieger Publishing Company, Malabar, Florida.	0.25	iv	mammal	Mus_musculus	da Silva, N.J. and Aird, S.D., 2001. Prey specificity, comparative lethality and compositional differences of coral snake venoms. Comparative Biochemistry and Physiology Part C: Toxicology & Pharmacology, 128(3), pp.425-456.	0	0	0	100	0	0	0	no	da Silva, N.J. and Aird, S.D., 2001. Prey specificity, comparative lethality and compositional differences of coral snake venoms. Comparative Biochemistry and Physiology Part C: Toxicology & Pharmacology, 128(3), pp.425-456.	782.863285	4
Micrurus_altirostris	Elapidae	131	Boback, S. M. & Guyer, C. A test of reproductive power in snakes. Ecology 89, 1428-1435 (2008)	483	316.35	9	Roze J.A. (1996) Coral snakes of the Americas. Biology, identification, and venoms. Krieger Publishing Company, Malabar, Florida.	0.5	ip	mammal	Mus_musculus	da Silva, N.J. and Aird, S.D., 2001. Prey specificity, comparative lethality and compositional differences of coral snake venoms. Comparative Biochemistry and Physiology Part C: Toxicology & Pharmacology, 128(3), pp.425-456.	0	0	0	100	0	0	0	no	da Silva, N.J. and Aird, S.D., 2001. Prey specificity, comparative lethality and compositional differences of coral snake venoms. Comparative Biochemistry and Physiology Part C: Toxicology & Pharmacology, 128(3), pp.425-456.	782.863285	4
Micrurus_altirostris	Elapidae	131	Boback, S. M. & Guyer, C. A test of reproductive power in snakes. Ecology 89, 1428-1435 (2008)	483	316.35	9	Roze J.A. (1996) Coral snakes of the Americas. Biology, identification, and venoms. Krieger Publishing Company, Malabar, Florida.	0.65	im	mammal	Mus_musculus	da Silva, N.J. and Aird, S.D., 2001. Prey specificity, comparative lethality and compositional differences of coral snake venoms. Comparative Biochemistry and Physiology Part C: Toxicology & Pharmacology, 128(3), pp.425-456.	0	0	0	100	0	0	0	no	da Silva, N.J. and Aird, S.D., 2001. Prey specificity, comparative lethality and compositional differences of coral snake venoms. Comparative Biochemistry and Physiology Part C: Toxicology & Pharmacology, 128(3), pp.425-456.	782.863285	4
Micrurus_altirostris	Elapidae	131	Boback, S. M. & Guyer, C. A test of reproductive power in snakes. Ecology 89, 1428-1435 (2008)	483	419	9	Roze J.A. (1996) Coral snakes of the Americas. Biology, identification, and venoms. Krieger Publishing Company, Malabar, Florida.	0.75	ip	fish	Gymnotus_carapo	da Silva, N.J. and Aird, S.D., 2001. Prey specificity, comparative lethality and compositional differences of coral snake venoms. Comparative Biochemistry and Physiology Part C: Toxicology & Pharmacology, 128(3), pp.425-456.	0	0	0	100	0	0	0	no	da Silva, N.J. and Aird, S.D., 2001. Prey specificity, comparative lethality and compositional differences of coral snake venoms. Comparative Biochemistry and Physiology Part C: Toxicology & Pharmacology, 128(3), pp.425-456.	782.863285	4
Micrurus_altirostris	Elapidae	131	Boback, S. M. & Guyer, C. A test of reproductive power in snakes. Ecology 89, 1428-1435 (2008)	483	419	9	Roze J.A. (1996) Coral snakes of the Americas. Biology, identification, and venoms. Krieger Publishing Company, Malabar, Florida.	0.9	im	fish	Gymnotus_carapo	da Silva, N.J. and Aird, S.D., 2001. Prey specificity, comparative lethality and compositional differences of coral snake venoms. Comparative Biochemistry and Physiology Part C: Toxicology & Pharmacology, 128(3), pp.425-456.	0	0	0	100	0	0	0	no	da Silva, N.J. and Aird, S.D., 2001. Prey specificity, comparative lethality and compositional differences of coral snake venoms. Comparative Biochemistry and Physiology Part C: Toxicology & Pharmacology, 128(3), pp.425-456.	782.863285	4
Micrurus_altirostris	Elapidae	131	Boback, S. M. & Guyer, C. A test of reproductive power in snakes. Ecology 89, 1428-1435 (2008)	483	419	9	Roze J.A. (1996) Coral snakes of the Americas. Biology, identification, and venoms. Krieger Publishing Company, Malabar, Florida.	0.75	im	fish	Synbranchus_marmoratus	da Silva, N.J. and Aird, S.D., 2001. Prey specificity, comparative lethality and compositional differences of coral snake venoms. Comparative Biochemistry and Physiology Part C: Toxicology & Pharmacology, 128(3), pp.425-456.	0	0	0	100	0	0	0	no	da Silva, N.J. and Aird, S.D., 2001. Prey specificity, comparative lethality and compositional differences of coral snake venoms. Comparative Biochemistry and Physiology Part C: Toxicology & Pharmacology, 128(3), pp.425-456.	782.863285	4
Micrurus_altirostris	Elapidae	131	Boback, S. M. & Guyer, C. A test of reproductive power in snakes. Ecology 89, 1428-1435 (2008)	483	419	9	Roze J.A. (1996) Coral snakes of the Americas. Biology, identification, and venoms. Krieger Publishing Company, Malabar, Florida.	0.65	ip	fish	Synbranchus_marmoratus	da Silva, N.J. and Aird, S.D., 2001. Prey specificity, comparative lethality and compositional differences of coral snake venoms. Comparative Biochemistry and Physiology Part C: Toxicology & Pharmacology, 128(3), pp.425-456.	0	0	0	100	0	0	0	no	da Silva, N.J. and Aird, S.D., 2001. Prey specificity, comparative lethality and compositional differences of coral snake venoms. Comparative Biochemistry and Physiology Part C: Toxicology & Pharmacology, 128(3), pp.425-456.	782.863285	4
Micrurus_altirostris	Elapidae	131	Boback, S. M. & Guyer, C. A test of reproductive power in snakes. Ecology 89, 1428-1435 (2008)	483	264.5610215	9	Roze J.A. (1996) Coral snakes of the Americas. Biology, identification, and venoms. Krieger Publishing Company, Malabar, Florida.	0.45	im	lizard	Amphisbaena_cunhai	da Silva, N.J. and Aird, S.D., 2001. Prey specificity, comparative lethality and compositional differences of coral snake venoms. Comparative Biochemistry and Physiology Part C: Toxicology & Pharmacology, 128(3), pp.425-456.	0	0	0	100	0	0	0	no	da Silva, N.J. and Aird, S.D., 2001. Prey specificity, comparative lethality and compositional differences of coral snake venoms. Comparative Biochemistry and Physiology Part C: Toxicology & Pharmacology, 128(3), pp.425-456.	782.863285	4
Micrurus_altirostris	Elapidae	131	Boback, S. M. & Guyer, C. A test of reproductive power in snakes. Ecology 89, 1428-1435 (2008)	483	264.5610215	9	Roze J.A. (1996) Coral snakes of the Americas. Biology, identification, and venoms. Krieger Publishing Company, Malabar, Florida.	0.25	ip	lizard	Amphisbaena_cunhai	da Silva, N.J. and Aird, S.D., 2001. Prey specificity, comparative lethality and compositional differences of coral snake venoms. Comparative Biochemistry and Physiology Part C: Toxicology & Pharmacology, 128(3), pp.425-456.	0	0	0	100	0	0	0	no	da Silva, N.J. and Aird, S.D., 2001. Prey specificity, comparative lethality and compositional differences of coral snake venoms. Comparative Biochemistry and Physiology Part C: Toxicology & Pharmacology, 128(3), pp.425-456.	782.863285	4
Micrurus_altirostris	Elapidae	131	Boback, S. M. & Guyer, C. A test of reproductive power in snakes. Ecology 89, 1428-1435 (2008)	483	133.727766	9	Roze J.A. (1996) Coral snakes of the Americas. Biology, identification, and venoms. Krieger Publishing Company, Malabar, Florida.	0.065	ip	lizard	Liophis_typhlus	da Silva, N.J. and Aird, S.D., 2001. Prey specificity, comparative lethality and compositional differences of coral snake venoms. Comparative Biochemistry and Physiology Part C: Toxicology & Pharmacology, 128(3), pp.425-456.	0	0	0	100	0	0	0	no	da Silva, N.J. and Aird, S.D., 2001. Prey specificity, comparative lethality and compositional differences of coral snake venoms. Comparative Biochemistry and Physiology Part C: Toxicology & Pharmacology, 128(3), pp.425-456.	782.863285	4
Micrurus_altirostris	Elapidae	131	Boback, S. M. & Guyer, C. A test of reproductive power in snakes. Ecology 89, 1428-1435 (2008)	483	133.727766	9	Roze J.A. (1996) Coral snakes of the Americas. Biology, identification, and venoms. Krieger Publishing Company, Malabar, Florida.	0.15	im	lizard	Liophis_typhlus	da Silva, N.J. and Aird, S.D., 2001. Prey specificity, comparative lethality and compositional differences of coral snake venoms. Comparative Biochemistry and Physiology Part C: Toxicology & Pharmacology, 128(3), pp.425-456.	0	0	0	100	0	0	0	no	da Silva, N.J. and Aird, S.D., 2001. Prey specificity, comparative lethality and compositional differences of coral snake venoms. Comparative Biochemistry and Physiology Part C: Toxicology & Pharmacology, 128(3), pp.425-456.	782.863285	4
Micrurus_corallinus	Elapidae	99	Boback, S. M. & Guyer, C. A test of reproductive power in snakes. Ecology 89, 1428-1435 (2008)	246	294.20655	11	Roze J.A. (1996) Coral snakes of the Americas. Biology, identification, and venoms. Krieger Publishing Company, Malabar, Florida.	0.04	iv	mammal	Mus_musculus	da Silva, N.J. and Aird, S.D., 2001. Prey specificity, comparative lethality and compositional differences of coral snake venoms. Comparative Biochemistry and Physiology Part C: Toxicology & Pharmacology, 128(3), pp.425-456.	0	0	9.6	90.4	0	0	0	no	da Silva, N.J. and Aird, S.D., 2001. Prey specificity, comparative lethality and compositional differences of coral snake venoms. Comparative Biochemistry and Physiology Part C: Toxicology & Pharmacology, 128(3), pp.425-456.	1771.558302	10
Micrurus_corallinus	Elapidae	99	Boback, S. M. & Guyer, C. A test of reproductive power in snakes. Ecology 89, 1428-1435 (2008)	246	294.20655	11	Roze J.A. (1996) Coral snakes of the Americas. Biology, identification, and venoms. Krieger Publishing Company, Malabar, Florida.	0.09	ip	mammal	Mus_musculus	da Silva, N.J. and Aird, S.D., 2001. Prey specificity, comparative lethality and compositional differences of coral snake venoms. Comparative Biochemistry and Physiology Part C: Toxicology & Pharmacology, 128(3), pp.425-456.	0	0	9.6	90.4	0	0	0	no	da Silva, N.J. and Aird, S.D., 2001. Prey specificity, comparative lethality and compositional differences of coral snake venoms. Comparative Biochemistry and Physiology Part C: Toxicology & Pharmacology, 128(3), pp.425-456.	1771.558302	10
Micrurus_corallinus	Elapidae	99	Boback, S. M. & Guyer, C. A test of reproductive power in snakes. Ecology 89, 1428-1435 (2008)	246	294.20655	11	Roze J.A. (1996) Coral snakes of the Americas. Biology, identification, and venoms. Krieger Publishing Company, Malabar, Florida.	0.2	im	mammal	Mus_musculus	da Silva, N.J. and Aird, S.D., 2001. Prey specificity, comparative lethality and compositional differences of coral snake venoms. Comparative Biochemistry and Physiology Part C: Toxicology & Pharmacology, 128(3), pp.425-456.	0	0	9.6	90.4	0	0	0	no	da Silva, N.J. and Aird, S.D., 2001. Prey specificity, comparative lethality and compositional differences of coral snake venoms. Comparative Biochemistry and Physiology Part C: Toxicology & Pharmacology, 128(3), pp.425-456.	1771.558302	10
Micrurus_corallinus	Elapidae	99	Boback, S. M. & Guyer, C. A test of reproductive power in snakes. Ecology 89, 1428-1435 (2008)	246	384.223	11	Roze J.A. (1996) Coral snakes of the Americas. Biology, identification, and venoms. Krieger Publishing Company, Malabar, Florida.	0.4	ip	fish	Gymnotus_carapo	da Silva, N.J. and Aird, S.D., 2001. Prey specificity, comparative lethality and compositional differences of coral snake venoms. Comparative Biochemistry and Physiology Part C: Toxicology & Pharmacology, 128(3), pp.425-456.	0	0	9.6	90.4	0	0	0	no	da Silva, N.J. and Aird, S.D., 2001. Prey specificity, comparative lethality and compositional differences of coral snake venoms. Comparative Biochemistry and Physiology Part C: Toxicology & Pharmacology, 128(3), pp.425-456.	1771.558302	10
Micrurus_corallinus	Elapidae	99	Boback, S. M. & Guyer, C. A test of reproductive power in snakes. Ecology 89, 1428-1435 (2008)	246	384.223	11	Roze J.A. (1996) Coral snakes of the Americas. Biology, identification, and venoms. Krieger Publishing Company, Malabar, Florida.	0.7	im	fish	Gymnotus_carapo	da Silva, N.J. and Aird, S.D., 2001. Prey specificity, comparative lethality and compositional differences of coral snake venoms. Comparative Biochemistry and Physiology Part C: Toxicology & Pharmacology, 128(3), pp.425-456.	0	0	9.6	90.4	0	0	0	no	da Silva, N.J. and Aird, S.D., 2001. Prey specificity, comparative lethality and compositional differences of coral snake venoms. Comparative Biochemistry and Physiology Part C: Toxicology & Pharmacology, 128(3), pp.425-456.	1771.558302	10
Micrurus_corallinus	Elapidae	99	Boback, S. M. & Guyer, C. A test of reproductive power in snakes. Ecology 89, 1428-1435 (2008)	246	384.223	11	Roze J.A. (1996) Coral snakes of the Americas. Biology, identification, and venoms. Krieger Publishing Company, Malabar, Florida.	0.7	ip	fish	Synbranchus_marmoratus	da Silva, N.J. and Aird, S.D., 2001. Prey specificity, comparative lethality and compositional differences of coral snake venoms. Comparative Biochemistry and Physiology Part C: Toxicology & Pharmacology, 128(3), pp.425-456.	0	0	9.6	90.4	0	0	0	no	da Silva, N.J. and Aird, S.D., 2001. Prey specificity, comparative lethality and compositional differences of coral snake venoms. Comparative Biochemistry and Physiology Part C: Toxicology & Pharmacology, 128(3), pp.425-456.	1771.558302	10
Micrurus_corallinus	Elapidae	99	Boback, S. M. & Guyer, C. A test of reproductive power in snakes. Ecology 89, 1428-1435 (2008)	246	384.223	11	Roze J.A. (1996) Coral snakes of the Americas. Biology, identification, and venoms. Krieger Publishing Company, Malabar, Florida.	0.8	im	fish	Synbranchus_marmoratus	da Silva, N.J. and Aird, S.D., 2001. Prey specificity, comparative lethality and compositional differences of coral snake venoms. Comparative Biochemistry and Physiology Part C: Toxicology & Pharmacology, 128(3), pp.425-456.	0	0	9.6	90.4	0	0	0	no	da Silva, N.J. and Aird, S.D., 2001. Prey specificity, comparative lethality and compositional differences of coral snake venoms. Comparative Biochemistry and Physiology Part C: Toxicology & Pharmacology, 128(3), pp.425-456.	1771.558302	10
Micrurus_corallinus	Elapidae	99	Boback, S. M. & Guyer, C. A test of reproductive power in snakes. Ecology 89, 1428-1435 (2008)	246	144.3913397	11	Roze J.A. (1996) Coral snakes of the Americas. Biology, identification, and venoms. Krieger Publishing Company, Malabar, Florida.	0.04	ip	lizard	Amphisbaena_cunhai	da Silva, N.J. and Aird, S.D., 2001. Prey specificity, comparative lethality and compositional differences of coral snake venoms. Comparative Biochemistry and Physiology Part C: Toxicology & Pharmacology, 128(3), pp.425-456.	0	0	9.6	90.4	0	0	0	no	da Silva, N.J. and Aird, S.D., 2001. Prey specificity, comparative lethality and compositional differences of coral snake venoms. Comparative Biochemistry and Physiology Part C: Toxicology & Pharmacology, 128(3), pp.425-456.	1771.558302	10
Micrurus_corallinus	Elapidae	99	Boback, S. M. & Guyer, C. A test of reproductive power in snakes. Ecology 89, 1428-1435 (2008)	246	144.3913397	11	Roze J.A. (1996) Coral snakes of the Americas. Biology, identification, and venoms. Krieger Publishing Company, Malabar, Florida.	0.06	im	lizard	Amphisbaena_cunhai	da Silva, N.J. and Aird, S.D., 2001. Prey specificity, comparative lethality and compositional differences of coral snake venoms. Comparative Biochemistry and Physiology Part C: Toxicology & Pharmacology, 128(3), pp.425-456.	0	0	9.6	90.4	0	0	0	no	da Silva, N.J. and Aird, S.D., 2001. Prey specificity, comparative lethality and compositional differences of coral snake venoms. Comparative Biochemistry and Physiology Part C: Toxicology & Pharmacology, 128(3), pp.425-456.	1771.558302	10
Micrurus_corallinus	Elapidae	99	Boback, S. M. & Guyer, C. A test of reproductive power in snakes. Ecology 89, 1428-1435 (2008)	246	296.4230919	11	Roze J.A. (1996) Coral snakes of the Americas. Biology, identification, and venoms. Krieger Publishing Company, Malabar, Florida.	0.3	ip	lizard	Liophis_typhlus	da Silva, N.J. and Aird, S.D., 2001. Prey specificity, comparative lethality and compositional differences of coral snake venoms. Comparative Biochemistry and Physiology Part C: Toxicology & Pharmacology, 128(3), pp.425-456.	0	0	9.6	90.4	0	0	0	no	da Silva, N.J. and Aird, S.D., 2001. Prey specificity, comparative lethality and compositional differences of coral snake venoms. Comparative Biochemistry and Physiology Part C: Toxicology & Pharmacology, 128(3), pp.425-456.	1771.558302	10
Micrurus_corallinus	Elapidae	99	Boback, S. M. & Guyer, C. A test of reproductive power in snakes. Ecology 89, 1428-1435 (2008)	246	296.4230919	11	Roze J.A. (1996) Coral snakes of the Americas. Biology, identification, and venoms. Krieger Publishing Company, Malabar, Florida.	0.5	im	lizard	Liophis_typhlus	da Silva, N.J. and Aird, S.D., 2001. Prey specificity, comparative lethality and compositional differences of coral snake venoms. Comparative Biochemistry and Physiology Part C: Toxicology & Pharmacology, 128(3), pp.425-456.	0	0	9.6	90.4	0	0	0	no	da Silva, N.J. and Aird, S.D., 2001. Prey specificity, comparative lethality and compositional differences of coral snake venoms. Comparative Biochemistry and Physiology Part C: Toxicology & Pharmacology, 128(3), pp.425-456.	1771.558302	10
Micrurus_frontalis	Elapidae	130	Boback, S. M. & Guyer, C. A test of reproductive power in snakes. Ecology 89, 1428-1435 (2008)	475	316.35	18	Roze J.A. (1996) Coral snakes of the Americas. Biology, identification, and venoms. Krieger Publishing Company, Malabar, Florida.; Minton S.A. (1974) Venom Diseases. Ed. Thomas C.C., Springfield, Illinois.	0.45	iv	mammal	Mus_musculus	da Silva, N.J. and Aird, S.D., 2001. Prey specificity, comparative lethality and compositional differences of coral snake venoms. Comparative Biochemistry and Physiology Part C: Toxicology & Pharmacology, 128(3), pp.425-456.	0	0	0	100	0	0	0	no	da Silva, N.J. and Aird, S.D., 2001. Prey specificity, comparative lethality and compositional differences of coral snake venoms. Comparative Biochemistry and Physiology Part C: Toxicology & Pharmacology, 128(3), pp.425-456.	889.648355	7
Micrurus_frontalis	Elapidae	130	Boback, S. M. & Guyer, C. A test of reproductive power in snakes. Ecology 89, 1428-1435 (2008)	475	316.35	18	Roze J.A. (1996) Coral snakes of the Americas. Biology, identification, and venoms. Krieger Publishing Company, Malabar, Florida.; Minton S.A. (1974) Venom Diseases. Ed. Thomas C.C., Springfield, Illinois.	0.6	ip	mammal	Mus_musculus	da Silva, N.J. and Aird, S.D., 2001. Prey specificity, comparative lethality and compositional differences of coral snake venoms. Comparative Biochemistry and Physiology Part C: Toxicology & Pharmacology, 128(3), pp.425-456.	0	0	0	100	0	0	0	no	da Silva, N.J. and Aird, S.D., 2001. Prey specificity, comparative lethality and compositional differences of coral snake venoms. Comparative Biochemistry and Physiology Part C: Toxicology & Pharmacology, 128(3), pp.425-456.	889.648355	7
Micrurus_frontalis	Elapidae	130	Boback, S. M. & Guyer, C. A test of reproductive power in snakes. Ecology 89, 1428-1435 (2008)	475	316.35	18	Roze J.A. (1996) Coral snakes of the Americas. Biology, identification, and venoms. Krieger Publishing Company, Malabar, Florida.; Minton S.A. (1974) Venom Diseases. Ed. Thomas C.C., Springfield, Illinois.	0.75	im	mammal	Mus_musculus	da Silva, N.J. and Aird, S.D., 2001. Prey specificity, comparative lethality and compositional differences of coral snake venoms. Comparative Biochemistry and Physiology Part C: Toxicology & Pharmacology, 128(3), pp.425-456.	0	0	0	100	0	0	0	no	da Silva, N.J. and Aird, S.D., 2001. Prey specificity, comparative lethality and compositional differences of coral snake venoms. Comparative Biochemistry and Physiology Part C: Toxicology & Pharmacology, 128(3), pp.425-456.	889.648355	7
Micrurus_frontalis	Elapidae	130	Boback, S. M. & Guyer, C. A test of reproductive power in snakes. Ecology 89, 1428-1435 (2008)	475	419	18	Roze J.A. (1996) Coral snakes of the Americas. Biology, identification, and venoms. Krieger Publishing Company, Malabar, Florida.; Minton S.A. (1974) Venom Diseases. Ed. Thomas C.C., Springfield, Illinois.	0.85	ip	fish	Gymnotus_carapo	da Silva, N.J. and Aird, S.D., 2001. Prey specificity, comparative lethality and compositional differences of coral snake venoms. Comparative Biochemistry and Physiology Part C: Toxicology & Pharmacology, 128(3), pp.425-456.	0	0	0	100	0	0	0	no	da Silva, N.J. and Aird, S.D., 2001. Prey specificity, comparative lethality and compositional differences of coral snake venoms. Comparative Biochemistry and Physiology Part C: Toxicology & Pharmacology, 128(3), pp.425-456.	889.648355	7
Micrurus_frontalis	Elapidae	130	Boback, S. M. & Guyer, C. A test of reproductive power in snakes. Ecology 89, 1428-1435 (2008)	475	419	18	Roze J.A. (1996) Coral snakes of the Americas. Biology, identification, and venoms. Krieger Publishing Company, Malabar, Florida.; Minton S.A. (1974) Venom Diseases. Ed. Thomas C.C., Springfield, Illinois.	1.1	im	fish	Gymnotus_carapo	da Silva, N.J. and Aird, S.D., 2001. Prey specificity, comparative lethality and compositional differences of coral snake venoms. Comparative Biochemistry and Physiology Part C: Toxicology & Pharmacology, 128(3), pp.425-456.	0	0	0	100	0	0	0	no	da Silva, N.J. and Aird, S.D., 2001. Prey specificity, comparative lethality and compositional differences of coral snake venoms. Comparative Biochemistry and Physiology Part C: Toxicology & Pharmacology, 128(3), pp.425-456.	889.648355	7
Micrurus_frontalis	Elapidae	130	Boback, S. M. & Guyer, C. A test of reproductive power in snakes. Ecology 89, 1428-1435 (2008)	475	419	18	Roze J.A. (1996) Coral snakes of the Americas. Biology, identification, and venoms. Krieger Publishing Company, Malabar, Florida.; Minton S.A. (1974) Venom Diseases. Ed. Thomas C.C., Springfield, Illinois.	0.85	ip	fish	Synbranchus_marmoratus	da Silva, N.J. and Aird, S.D., 2001. Prey specificity, comparative lethality and compositional differences of coral snake venoms. Comparative Biochemistry and Physiology Part C: Toxicology & Pharmacology, 128(3), pp.425-456.	0	0	0	100	0	0	0	no	da Silva, N.J. and Aird, S.D., 2001. Prey specificity, comparative lethality and compositional differences of coral snake venoms. Comparative Biochemistry and Physiology Part C: Toxicology & Pharmacology, 128(3), pp.425-456.	889.648355	7
Micrurus_frontalis	Elapidae	130	Boback, S. M. & Guyer, C. A test of reproductive power in snakes. Ecology 89, 1428-1435 (2008)	475	419	18	Roze J.A. (1996) Coral snakes of the Americas. Biology, identification, and venoms. Krieger Publishing Company, Malabar, Florida.; Minton S.A. (1974) Venom Diseases. Ed. Thomas C.C., Springfield, Illinois.	1.1	im	fish	Synbranchus_marmoratus	da Silva, N.J. and Aird, S.D., 2001. Prey specificity, comparative lethality and compositional differences of coral snake venoms. Comparative Biochemistry and Physiology Part C: Toxicology & Pharmacology, 128(3), pp.425-456.	0	0	0	100	0	0	0	no	da Silva, N.J. and Aird, S.D., 2001. Prey specificity, comparative lethality and compositional differences of coral snake venoms. Comparative Biochemistry and Physiology Part C: Toxicology & Pharmacology, 128(3), pp.425-456.	889.648355	7
Micrurus_frontalis	Elapidae	130	Boback, S. M. & Guyer, C. A test of reproductive power in snakes. Ecology 89, 1428-1435 (2008)	475	186.4300447	18	Roze J.A. (1996) Coral snakes of the Americas. Biology, identification, and venoms. Krieger Publishing Company, Malabar, Florida.; Minton S.A. (1974) Venom Diseases. Ed. Thomas C.C., Springfield, Illinois.	0.25	ip	lizard	Amphisbaena_cunhai	da Silva, N.J. and Aird, S.D., 2001. Prey specificity, comparative lethality and compositional differences of coral snake venoms. Comparative Biochemistry and Physiology Part C: Toxicology & Pharmacology, 128(3), pp.425-456.	0	0	0	100	0	0	0	no	da Silva, N.J. and Aird, S.D., 2001. Prey specificity, comparative lethality and compositional differences of coral snake venoms. Comparative Biochemistry and Physiology Part C: Toxicology & Pharmacology, 128(3), pp.425-456.	889.648355	7
Micrurus_frontalis	Elapidae	130	Boback, S. M. & Guyer, C. A test of reproductive power in snakes. Ecology 89, 1428-1435 (2008)	475	186.4300447	18	Roze J.A. (1996) Coral snakes of the Americas. Biology, identification, and venoms. Krieger Publishing Company, Malabar, Florida.; Minton S.A. (1974) Venom Diseases. Ed. Thomas C.C., Springfield, Illinois.	0.4	im	lizard	Amphisbaena_cunhai	da Silva, N.J. and Aird, S.D., 2001. Prey specificity, comparative lethality and compositional differences of coral snake venoms. Comparative Biochemistry and Physiology Part C: Toxicology & Pharmacology, 128(3), pp.425-456.	0	0	0	100	0	0	0	no	da Silva, N.J. and Aird, S.D., 2001. Prey specificity, comparative lethality and compositional differences of coral snake venoms. Comparative Biochemistry and Physiology Part C: Toxicology & Pharmacology, 128(3), pp.425-456.	889.648355	7
Micrurus_frontalis	Elapidae	130	Boback, S. M. & Guyer, C. A test of reproductive power in snakes. Ecology 89, 1428-1435 (2008)	475	212.4280381	18	Roze J.A. (1996) Coral snakes of the Americas. Biology, identification, and venoms. Krieger Publishing Company, Malabar, Florida.; Minton S.A. (1974) Venom Diseases. Ed. Thomas C.C., Springfield, Illinois.	0.085	ip	lizard	Liophis_typhlus	da Silva, N.J. and Aird, S.D., 2001. Prey specificity, comparative lethality and compositional differences of coral snake venoms. Comparative Biochemistry and Physiology Part C: Toxicology & Pharmacology, 128(3), pp.425-456.	0	0	0	100	0	0	0	no	da Silva, N.J. and Aird, S.D., 2001. Prey specificity, comparative lethality and compositional differences of coral snake venoms. Comparative Biochemistry and Physiology Part C: Toxicology & Pharmacology, 128(3), pp.425-456.	889.648355	7
Micrurus_frontalis	Elapidae	130	Boback, S. M. & Guyer, C. A test of reproductive power in snakes. Ecology 89, 1428-1435 (2008)	475	212.4280381	18	Roze J.A. (1996) Coral snakes of the Americas. Biology, identification, and venoms. Krieger Publishing Company, Malabar, Florida.; Minton S.A. (1974) Venom Diseases. Ed. Thomas C.C., Springfield, Illinois.	0.25	im	lizard	Liophis_typhlus	da Silva, N.J. and Aird, S.D., 2001. Prey specificity, comparative lethality and compositional differences of coral snake venoms. Comparative Biochemistry and Physiology Part C: Toxicology & Pharmacology, 128(3), pp.425-456.	0	0	0	100	0	0	0	no	da Silva, N.J. and Aird, S.D., 2001. Prey specificity, comparative lethality and compositional differences of coral snake venoms. Comparative Biochemistry and Physiology Part C: Toxicology & Pharmacology, 128(3), pp.425-456.	889.648355	7
Micrurus_frontalis	Elapidae	130	Boback, S. M. & Guyer, C. A test of reproductive power in snakes. Ecology 89, 1428-1435 (2008)	475	316.35	18	Roze J.A. (1996) Coral snakes of the Americas. Biology, identification, and venoms. Krieger Publishing Company, Malabar, Florida.; Minton S.A. (1974) Venom Diseases. Ed. Thomas C.C., Springfield, Illinois.	0.63	ip	mammal	Mus_musculus	Handbook of Natural Toxins: Reptile Venoms and Toxins	0	0	0	100	0	0	0	no	da Silva, N.J. and Aird, S.D., 2001. Prey specificity, comparative lethality and compositional differences of coral snake venoms. Comparative Biochemistry and Physiology Part C: Toxicology & Pharmacology, 128(3), pp.425-456.	889.648355	7
Micrurus_fulvius	Elapidae	121	Boback, S. M. & Guyer, C. A test of reproductive power in snakes. Ecology 89, 1428-1435 (2008)	399	316.3500016	5.25	Roze J.A. (1996) Coral snakes of the Americas. Biology, identification, and venoms. Krieger Publishing Company, Malabar, Florida.; Minton S.A. (1974) Venom Diseases. Ed. Thomas C.C., Springfield, Illinois.; Russell F.E. (1964) Venomous animals and their toxins. Ann. Rep. Smithsonian Inst., pp 477-487. ; U.S. Department of the Navy (1968) Poisonous Snakes of the World. United States Government Pri…	0.85	ip	mammal	Mus_musculus	Wisniewski, M.S., Hill, R.E., Havey, J.M., Bogdan, G.M. and Dart, R.C., 2003. Australian Tiger Snake (Notechis scutatus) and Mexican Coral Snake (Micruris species) Antivenoms Prevent Death from United States Coral Snake (Micrurus fulvius fulvius) Venom in a Mouse Model: ARTICLE. Journal of Toxicology: Clinical Toxicology, 41(1), pp.7-10.	0	0	0.47	98.6	0	0	0.93	no	Jackson, D.R. and Franz, R., 1981. Ecology of the eastern coral snake (Micrurus fulvius) in northern peninsular Florida. Herpetologica, pp.213-228.	1469.467598	15
Micrurus_fulvius	Elapidae	121	Boback, S. M. & Guyer, C. A test of reproductive power in snakes. Ecology 89, 1428-1435 (2008)	399	316.3500016	5.25	Roze J.A. (1996) Coral snakes of the Americas. Biology, identification, and venoms. Krieger Publishing Company, Malabar, Florida.; Minton S.A. (1974) Venom Diseases. Ed. Thomas C.C., Springfield, Illinois.; Russell F.E. (1964) Venomous animals and their toxins. Ann. Rep. Smithsonian Inst., pp 477-487. ; U.S. Department of the Navy (1968) Poisonous Snakes of the World. United States Government Pri…	0.506	ip	mammal	Mus_musculus	Bolanos, R., Cerdas, L. and Taylor, R., 1975. The production and characteristics of a coral snake (Micrurus mipartitus hertwigi) antivenin. Toxicon, 13(2), pp.139-142.	0	0	0.47	98.6	0	0	0.93	no	Jackson, D.R. and Franz, R., 1981. Ecology of the eastern coral snake (Micrurus fulvius) in northern peninsular Florida. Herpetologica, pp.213-228.	1469.467598	15
Micrurus_fulvius	Elapidae	121	Boback, S. M. & Guyer, C. A test of reproductive power in snakes. Ecology 89, 1428-1435 (2008)	399	316.3500016	5.25	Roze J.A. (1996) Coral snakes of the Americas. Biology, identification, and venoms. Krieger Publishing Company, Malabar, Florida.; Minton S.A. (1974) Venom Diseases. Ed. Thomas C.C., Springfield, Illinois.; Russell F.E. (1964) Venomous animals and their toxins. Ann. Rep. Smithsonian Inst., pp 477-487. ; U.S. Department of the Navy (1968) Poisonous Snakes of the World. United States Government Pri…	1.3	sc	mammal	Mus_musculus	Minton, SA (1967). Paraspecific protection by elapid and sea snake antivenins. Toxicon 5 (1): 47_55. doi:10.1016/0041-0101(67)90118-3.	0	0	0.47	98.6	0	0	0.93	no	Jackson, D.R. and Franz, R., 1981. Ecology of the eastern coral snake (Micrurus fulvius) in northern peninsular Florida. Herpetologica, pp.213-228.	1469.467598	15
Micrurus_fulvius	Elapidae	121	Boback, S. M. & Guyer, C. A test of reproductive power in snakes. Ecology 89, 1428-1435 (2008)	399	316.3500016	5.25	Roze J.A. (1996) Coral snakes of the Americas. Biology, identification, and venoms. Krieger Publishing Company, Malabar, Florida.; Minton S.A. (1974) Venom Diseases. Ed. Thomas C.C., Springfield, Illinois.; Russell F.E. (1964) Venomous animals and their toxins. Ann. Rep. Smithsonian Inst., pp 477-487. ; U.S. Department of the Navy (1968) Poisonous Snakes of the World. United States Government Pri…	0.9	ip	mammal	Mus_musculus	Handbook of Natural Toxins: Reptile Venoms and Toxins	0	0	0.47	98.6	0	0	0.93	no	Jackson, D.R. and Franz, R., 1981. Ecology of the eastern coral snake (Micrurus fulvius) in northern peninsular Florida. Herpetologica, pp.213-228.	1469.467598	15
Micrurus_fulvius	Elapidae	121	Boback, S. M. & Guyer, C. A test of reproductive power in snakes. Ecology 89, 1428-1435 (2008)	399	316.3500016	5.25	Roze J.A. (1996) Coral snakes of the Americas. Biology, identification, and venoms. Krieger Publishing Company, Malabar, Florida.; Minton S.A. (1974) Venom Diseases. Ed. Thomas C.C., Springfield, Illinois.; Russell F.E. (1964) Venomous animals and their toxins. Ann. Rep. Smithsonian Inst., pp 477-487. ; U.S. Department of the Navy (1968) Poisonous Snakes of the World. United States Government Pri…	0.667	ip	mammal	Mus_musculus	Kocholaty, W.F., Ledford, E.B., Daly, J.G. and Billings, T.A., 1971. Toxicity and some enzymatic properties and activities in the venoms of Crotalidae, Elapidae and Viperidae. Toxicon, 9(2), pp.131-138.	0	0	0.47	98.6	0	0	0.93	no	Jackson, D.R. and Franz, R., 1981. Ecology of the eastern coral snake (Micrurus fulvius) in northern peninsular Florida. Herpetologica, pp.213-228.	1469.467598	15
Micrurus_fulvius	Elapidae	121	Boback, S. M. & Guyer, C. A test of reproductive power in snakes. Ecology 89, 1428-1435 (2008)	399	316.3500016	5.25	Roze J.A. (1996) Coral snakes of the Americas. Biology, identification, and venoms. Krieger Publishing Company, Malabar, Florida.; Minton S.A. (1974) Venom Diseases. Ed. Thomas C.C., Springfield, Illinois.; Russell F.E. (1964) Venomous animals and their toxins. Ann. Rep. Smithsonian Inst., pp 477-487. ; U.S. Department of the Navy (1968) Poisonous Snakes of the World. United States Government Pri…	0.378	ip	mammal	Mus_musculus	Kocholaty, W.F., Ledford, E.B., Daly, J.G. and Billings, T.A., 1971. Toxicity and some enzymatic properties and activities in the venoms of Crotalidae, Elapidae and Viperidae. Toxicon, 9(2), pp.131-138.	0	0	0.47	98.6	0	0	0.93	no	Jackson, D.R. and Franz, R., 1981. Ecology of the eastern coral snake (Micrurus fulvius) in northern peninsular Florida. Herpetologica, pp.213-228.	1469.467598	15
Micrurus_fulvius	Elapidae	121	Boback, S. M. & Guyer, C. A test of reproductive power in snakes. Ecology 89, 1428-1435 (2008)	399	316.3500016	5.25	Roze J.A. (1996) Coral snakes of the Americas. Biology, identification, and venoms. Krieger Publishing Company, Malabar, Florida.; Minton S.A. (1974) Venom Diseases. Ed. Thomas C.C., Springfield, Illinois.; Russell F.E. (1964) Venomous animals and their toxins. Ann. Rep. Smithsonian Inst., pp 477-487. ; U.S. Department of the Navy (1968) Poisonous Snakes of the World. United States Government Pri…	0.212	iv	mammal	Mus_musculus	Bolanos, R., Cerdas, L. and Taylor, R., 1975. The production and characteristics of a coral snake (Micrurus mipartitus hertwigi) antivenin. Toxicon, 13(2), pp.139-142.	0	0	0.47	98.6	0	0	0.93	no	Jackson, D.R. and Franz, R., 1981. Ecology of the eastern coral snake (Micrurus fulvius) in northern peninsular Florida. Herpetologica, pp.213-228.	1469.467598	15
Micrurus_lemniscatus	Elapidae	116	Boback, S. M. & Guyer, C. A test of reproductive power in snakes. Ecology 89, 1428-1435 (2008)	361	347.8616116	9	Roze J.A. (1996) Coral snakes of the Americas. Biology, identification, and venoms. Krieger Publishing Company, Malabar, Florida.	0.2	iv	mammal	Mus_musculus	da Silva, N.J. and Aird, S.D., 2001. Prey specificity, comparative lethality and compositional differences of coral snake venoms. Comparative Biochemistry and Physiology Part C: Toxicology & Pharmacology, 128(3), pp.425-456.	30	0	0	70	0	0	0	no	da Silva, N.J. and Aird, S.D., 2001. Prey specificity, comparative lethality and compositional differences of coral snake venoms. Comparative Biochemistry and Physiology Part C: Toxicology & Pharmacology, 128(3), pp.425-456.	1137.712472	3
Micrurus_lemniscatus	Elapidae	116	Boback, S. M. & Guyer, C. A test of reproductive power in snakes. Ecology 89, 1428-1435 (2008)	361	347.8616116	9	Roze J.A. (1996) Coral snakes of the Americas. Biology, identification, and venoms. Krieger Publishing Company, Malabar, Florida.	0.4	ip	mammal	Mus_musculus	da Silva, N.J. and Aird, S.D., 2001. Prey specificity, comparative lethality and compositional differences of coral snake venoms. Comparative Biochemistry and Physiology Part C: Toxicology & Pharmacology, 128(3), pp.425-456.	30	0	0	70	0	0	0	no	da Silva, N.J. and Aird, S.D., 2001. Prey specificity, comparative lethality and compositional differences of coral snake venoms. Comparative Biochemistry and Physiology Part C: Toxicology & Pharmacology, 128(3), pp.425-456.	1137.712472	3
Micrurus_lemniscatus	Elapidae	116	Boback, S. M. & Guyer, C. A test of reproductive power in snakes. Ecology 89, 1428-1435 (2008)	361	347.8616116	9	Roze J.A. (1996) Coral snakes of the Americas. Biology, identification, and venoms. Krieger Publishing Company, Malabar, Florida.	0.5	im	mammal	Mus_musculus	da Silva, N.J. and Aird, S.D., 2001. Prey specificity, comparative lethality and compositional differences of coral snake venoms. Comparative Biochemistry and Physiology Part C: Toxicology & Pharmacology, 128(3), pp.425-456.	30	0	0	70	0	0	0	no	da Silva, N.J. and Aird, S.D., 2001. Prey specificity, comparative lethality and compositional differences of coral snake venoms. Comparative Biochemistry and Physiology Part C: Toxicology & Pharmacology, 128(3), pp.425-456.	1137.712472	3
Micrurus_lemniscatus	Elapidae	116	Boback, S. M. & Guyer, C. A test of reproductive power in snakes. Ecology 89, 1428-1435 (2008)	361	360.7186923	9	Roze J.A. (1996) Coral snakes of the Americas. Biology, identification, and venoms. Krieger Publishing Company, Malabar, Florida.	0.03	ip	fish	Gymnotus_carapo	da Silva, N.J. and Aird, S.D., 2001. Prey specificity, comparative lethality and compositional differences of coral snake venoms. Comparative Biochemistry and Physiology Part C: Toxicology & Pharmacology, 128(3), pp.425-456.	30	0	0	70	0	0	0	no	da Silva, N.J. and Aird, S.D., 2001. Prey specificity, comparative lethality and compositional differences of coral snake venoms. Comparative Biochemistry and Physiology Part C: Toxicology & Pharmacology, 128(3), pp.425-456.	1137.712472	3
Micrurus_lemniscatus	Elapidae	116	Boback, S. M. & Guyer, C. A test of reproductive power in snakes. Ecology 89, 1428-1435 (2008)	361	360.7186923	9	Roze J.A. (1996) Coral snakes of the Americas. Biology, identification, and venoms. Krieger Publishing Company, Malabar, Florida.	0.2	im	fish	Gymnotus_carapo	da Silva, N.J. and Aird, S.D., 2001. Prey specificity, comparative lethality and compositional differences of coral snake venoms. Comparative Biochemistry and Physiology Part C: Toxicology & Pharmacology, 128(3), pp.425-456.	30	0	0	70	0	0	0	no	da Silva, N.J. and Aird, S.D., 2001. Prey specificity, comparative lethality and compositional differences of coral snake venoms. Comparative Biochemistry and Physiology Part C: Toxicology & Pharmacology, 128(3), pp.425-456.	1137.712472	3
Micrurus_lemniscatus	Elapidae	116	Boback, S. M. & Guyer, C. A test of reproductive power in snakes. Ecology 89, 1428-1435 (2008)	361	289.9802307	9	Roze J.A. (1996) Coral snakes of the Americas. Biology, identification, and venoms. Krieger Publishing Company, Malabar, Florida.	0.1	ip	fish	Synbranchus_marmoratus	da Silva, N.J. and Aird, S.D., 2001. Prey specificity, comparative lethality and compositional differences of coral snake venoms. Comparative Biochemistry and Physiology Part C: Toxicology & Pharmacology, 128(3), pp.425-456.	30	0	0	70	0	0	0	no	da Silva, N.J. and Aird, S.D., 2001. Prey specificity, comparative lethality and compositional differences of coral snake venoms. Comparative Biochemistry and Physiology Part C: Toxicology & Pharmacology, 128(3), pp.425-456.	1137.712472	3
Micrurus_lemniscatus	Elapidae	116	Boback, S. M. & Guyer, C. A test of reproductive power in snakes. Ecology 89, 1428-1435 (2008)	361	289.9802307	9	Roze J.A. (1996) Coral snakes of the Americas. Biology, identification, and venoms. Krieger Publishing Company, Malabar, Florida.	0.4	im	fish	Synbranchus_marmoratus	da Silva, N.J. and Aird, S.D., 2001. Prey specificity, comparative lethality and compositional differences of coral snake venoms. Comparative Biochemistry and Physiology Part C: Toxicology & Pharmacology, 128(3), pp.425-456.	30	0	0	70	0	0	0	no	da Silva, N.J. and Aird, S.D., 2001. Prey specificity, comparative lethality and compositional differences of coral snake venoms. Comparative Biochemistry and Physiology Part C: Toxicology & Pharmacology, 128(3), pp.425-456.	1137.712472	3
Micrurus_lemniscatus	Elapidae	116	Boback, S. M. & Guyer, C. A test of reproductive power in snakes. Ecology 89, 1428-1435 (2008)	361	206.1479848	9	Roze J.A. (1996) Coral snakes of the Americas. Biology, identification, and venoms. Krieger Publishing Company, Malabar, Florida.	0.4	ip	lizard	Amphisbaena_cunhai	da Silva, N.J. and Aird, S.D., 2001. Prey specificity, comparative lethality and compositional differences of coral snake venoms. Comparative Biochemistry and Physiology Part C: Toxicology & Pharmacology, 128(3), pp.425-456.	30	0	0	70	0	0	0	no	da Silva, N.J. and Aird, S.D., 2001. Prey specificity, comparative lethality and compositional differences of coral snake venoms. Comparative Biochemistry and Physiology Part C: Toxicology & Pharmacology, 128(3), pp.425-456.	1137.712472	3
Micrurus_lemniscatus	Elapidae	116	Boback, S. M. & Guyer, C. A test of reproductive power in snakes. Ecology 89, 1428-1435 (2008)	361	206.1479848	9	Roze J.A. (1996) Coral snakes of the Americas. Biology, identification, and venoms. Krieger Publishing Company, Malabar, Florida.	0.7	im	lizard	Amphisbaena_cunhai	da Silva, N.J. and Aird, S.D., 2001. Prey specificity, comparative lethality and compositional differences of coral snake venoms. Comparative Biochemistry and Physiology Part C: Toxicology & Pharmacology, 128(3), pp.425-456.	30	0	0	70	0	0	0	no	da Silva, N.J. and Aird, S.D., 2001. Prey specificity, comparative lethality and compositional differences of coral snake venoms. Comparative Biochemistry and Physiology Part C: Toxicology & Pharmacology, 128(3), pp.425-456.	1137.712472	3
Micrurus_lemniscatus	Elapidae	116	Boback, S. M. & Guyer, C. A test of reproductive power in snakes. Ecology 89, 1428-1435 (2008)	361	336.4041508	9	Roze J.A. (1996) Coral snakes of the Americas. Biology, identification, and venoms. Krieger Publishing Company, Malabar, Florida.	0.5	ip	lizard	Liophis_typhlus	da Silva, N.J. and Aird, S.D., 2001. Prey specificity, comparative lethality and compositional differences of coral snake venoms. Comparative Biochemistry and Physiology Part C: Toxicology & Pharmacology, 128(3), pp.425-456.	30	0	0	70	0	0	0	no	da Silva, N.J. and Aird, S.D., 2001. Prey specificity, comparative lethality and compositional differences of coral snake venoms. Comparative Biochemistry and Physiology Part C: Toxicology & Pharmacology, 128(3), pp.425-456.	1137.712472	3
Micrurus_lemniscatus	Elapidae	116	Boback, S. M. & Guyer, C. A test of reproductive power in snakes. Ecology 89, 1428-1435 (2008)	361	336.4041508	9	Roze J.A. (1996) Coral snakes of the Americas. Biology, identification, and venoms. Krieger Publishing Company, Malabar, Florida.	0.7	im	lizard	Liophis_typhlus	da Silva, N.J. and Aird, S.D., 2001. Prey specificity, comparative lethality and compositional differences of coral snake venoms. Comparative Biochemistry and Physiology Part C: Toxicology & Pharmacology, 128(3), pp.425-456.	30	0	0	70	0	0	0	no	da Silva, N.J. and Aird, S.D., 2001. Prey specificity, comparative lethality and compositional differences of coral snake venoms. Comparative Biochemistry and Physiology Part C: Toxicology & Pharmacology, 128(3), pp.425-456.	1137.712472	3
Micrurus_mipartitus	Elapidae	120	Boback, S. M. & Guyer, C. A test of reproductive power in snakes. Ecology 89, 1428-1435 (2008)	391	316.35	7	Roze J.A. (1996) Coral snakes of the Americas. Biology, identification, and venoms. Krieger Publishing Company, Malabar, Florida.	0.47	ip	mammal	Mus_musculus	N__ez, V., Otero, R., Barona, J., Fonnegra, R., Jim_nez, S., Osorio, R.G., Quintana, J.C. and D�az, A., 2004. Inhibition of the toxic effects of Lachesis muta, Crotalus durissus cumanensis and Micrurus mipartitus snake venoms by plant extracts. Pharmaceutical biology, 42(1), pp.49-54.	0	0	0	100	0	0	0	no	Schmidt, K.P., 1932. Stomach contents of some American coral snakes, with the description of a new species of Geophis. Copeia, 1932(1), pp.6-9.	0	1
Micrurus_mipartitus	Elapidae	120	Boback, S. M. & Guyer, C. A test of reproductive power in snakes. Ecology 89, 1428-1435 (2008)	391	316.35	7	Roze J.A. (1996) Coral snakes of the Americas. Biology, identification, and venoms. Krieger Publishing Company, Malabar, Florida.	0.47	im	mammal	Mus_musculus	N__ez,, V., Otero, R., Barona, J., Fonnegra, R., Jim_nez, S., Osorio, R.G., Quintana, J.C. and D�az, A., 2004. Inhibition of the toxic effects of Lachesis muta, Crotalus durissus cumanensis and Micrurus mipartitus snake venoms by plant extracts. Pharmaceutical biology, 42(1), pp.49-54.	0	0	0	100	0	0	0	no	Schmidt, K.P., 1932. Stomach contents of some American coral snakes, with the description of a new species of Geophis. Copeia, 1932(1), pp.6-9.	0	1
Micrurus_mipartitus	Elapidae	120	Boback, S. M. & Guyer, C. A test of reproductive power in snakes. Ecology 89, 1428-1435 (2008)	391	316.35	7	Roze J.A. (1996) Coral snakes of the Americas. Biology, identification, and venoms. Krieger Publishing Company, Malabar, Florida.	1.35	ip	mammal	Mus_musculus	Bolanos, R., Cerdas, L. and Taylor, R., 1975. The production and characteristics of a coral snake (Micrurus mipartitus hertwigi) antivenin. Toxicon, 13(2), pp.139-142.	0	0	0	100	0	0	0	no	Schmidt, K.P., 1932. Stomach contents of some American coral snakes, with the description of a new species of Geophis. Copeia, 1932(1), pp.6-9.	0	1
Micrurus_mipartitus	Elapidae	120	Boback, S. M. & Guyer, C. A test of reproductive power in snakes. Ecology 89, 1428-1435 (2008)	391	316.35	7	Roze J.A. (1996) Coral snakes of the Americas. Biology, identification, and venoms. Krieger Publishing Company, Malabar, Florida.	1.77	iv	mammal	Mus_musculus	Bolanos, R., Cerdas, L. and Taylor, R., 1975. The production and characteristics of a coral snake (Micrurus mipartitus hertwigi) antivenin. Toxicon, 13(2), pp.139-142.	0	0	0	100	0	0	0	no	Schmidt, K.P., 1932. Stomach contents of some American coral snakes, with the description of a new species of Geophis. Copeia, 1932(1), pp.6-9.	0	1
Micrurus_mipartitus	Elapidae	120	Boback, S. M. & Guyer, C. A test of reproductive power in snakes. Ecology 89, 1428-1435 (2008)	391	316.35	7	Roze J.A. (1996) Coral snakes of the Americas. Biology, identification, and venoms. Krieger Publishing Company, Malabar, Florida.	0.12	ip	mammal	Mus_musculus	Bolanos, R., Cerdas, L. and Taylor, R., 1975. The production and characteristics of a coral snake (Micrurus mipartitus hertwigi) antivenin. Toxicon, 13(2), pp.139-142.	0	0	0	100	0	0	0	no	Schmidt, K.P., 1932. Stomach contents of some American coral snakes, with the description of a new species of Geophis. Copeia, 1932(1), pp.6-9.	0	1
Micrurus_pyrrhocryptus	Elapidae	125	Boback, S. M. & Guyer, C. A test of reproductive power in snakes. Ecology 89, 1428-1435 (2008)	432	316.35	8	Roze J.A. (1996) Coral snakes of the Americas. Biology, identification, and venoms. Krieger Publishing Company, Malabar, Florida.	0.5	iv	mammal	Mus_musculus	da Silva, N.J. and Aird, S.D., 2001. Prey specificity, comparative lethality and compositional differences of coral snake venoms. Comparative Biochemistry and Physiology Part C: Toxicology & Pharmacology, 128(3), pp.425-456.	0	0	0	100	0	0	0	no	da Silva, N.J. and Aird, S.D., 2001. Prey specificity, comparative lethality and compositional differences of coral snake venoms. Comparative Biochemistry and Physiology Part C: Toxicology & Pharmacology, 128(3), pp.425-456.	718.712475	2
Micrurus_pyrrhocryptus	Elapidae	125	Boback, S. M. & Guyer, C. A test of reproductive power in snakes. Ecology 89, 1428-1435 (2008)	432	316.35	8	Roze J.A. (1996) Coral snakes of the Americas. Biology, identification, and venoms. Krieger Publishing Company, Malabar, Florida.	0.6	ip	mammal	Mus_musculus	da Silva, N.J. and Aird, S.D., 2001. Prey specificity, comparative lethality and compositional differences of coral snake venoms. Comparative Biochemistry and Physiology Part C: Toxicology & Pharmacology, 128(3), pp.425-456.	0	0	0	100	0	0	0	no	da Silva, N.J. and Aird, S.D., 2001. Prey specificity, comparative lethality and compositional differences of coral snake venoms. Comparative Biochemistry and Physiology Part C: Toxicology & Pharmacology, 128(3), pp.425-456.	718.712475	2
Micrurus_pyrrhocryptus	Elapidae	125	Boback, S. M. & Guyer, C. A test of reproductive power in snakes. Ecology 89, 1428-1435 (2008)	432	316.35	8	Roze J.A. (1996) Coral snakes of the Americas. Biology, identification, and venoms. Krieger Publishing Company, Malabar, Florida.	0.7	im	mammal	Mus_musculus	da Silva, N.J. and Aird, S.D., 2001. Prey specificity, comparative lethality and compositional differences of coral snake venoms. Comparative Biochemistry and Physiology Part C: Toxicology & Pharmacology, 128(3), pp.425-456.	0	0	0	100	0	0	0	no	da Silva, N.J. and Aird, S.D., 2001. Prey specificity, comparative lethality and compositional differences of coral snake venoms. Comparative Biochemistry and Physiology Part C: Toxicology & Pharmacology, 128(3), pp.425-456.	718.712475	2
Micrurus_pyrrhocryptus	Elapidae	125	Boback, S. M. & Guyer, C. A test of reproductive power in snakes. Ecology 89, 1428-1435 (2008)	432	419	8	Roze J.A. (1996) Coral snakes of the Americas. Biology, identification, and venoms. Krieger Publishing Company, Malabar, Florida.	1.3	ip	fish	Gymnotus_carapo	da Silva, N.J. and Aird, S.D., 2001. Prey specificity, comparative lethality and compositional differences of coral snake venoms. Comparative Biochemistry and Physiology Part C: Toxicology & Pharmacology, 128(3), pp.425-456.	0	0	0	100	0	0	0	no	da Silva, N.J. and Aird, S.D., 2001. Prey specificity, comparative lethality and compositional differences of coral snake venoms. Comparative Biochemistry and Physiology Part C: Toxicology & Pharmacology, 128(3), pp.425-456.	718.712475	2
Micrurus_pyrrhocryptus	Elapidae	125	Boback, S. M. & Guyer, C. A test of reproductive power in snakes. Ecology 89, 1428-1435 (2008)	432	419	8	Roze J.A. (1996) Coral snakes of the Americas. Biology, identification, and venoms. Krieger Publishing Company, Malabar, Florida.	1.5	im	fish	Gymnotus_carapo	da Silva, N.J. and Aird, S.D., 2001. Prey specificity, comparative lethality and compositional differences of coral snake venoms. Comparative Biochemistry and Physiology Part C: Toxicology & Pharmacology, 128(3), pp.425-456.	0	0	0	100	0	0	0	no	da Silva, N.J. and Aird, S.D., 2001. Prey specificity, comparative lethality and compositional differences of coral snake venoms. Comparative Biochemistry and Physiology Part C: Toxicology & Pharmacology, 128(3), pp.425-456.	718.712475	2
Micrurus_pyrrhocryptus	Elapidae	125	Boback, S. M. & Guyer, C. A test of reproductive power in snakes. Ecology 89, 1428-1435 (2008)	432	419	8	Roze J.A. (1996) Coral snakes of the Americas. Biology, identification, and venoms. Krieger Publishing Company, Malabar, Florida.	1.2	ip	fish	Synbranchus_marmoratus	da Silva, N.J. and Aird, S.D., 2001. Prey specificity, comparative lethality and compositional differences of coral snake venoms. Comparative Biochemistry and Physiology Part C: Toxicology & Pharmacology, 128(3), pp.425-456.	0	0	0	100	0	0	0	no	da Silva, N.J. and Aird, S.D., 2001. Prey specificity, comparative lethality and compositional differences of coral snake venoms. Comparative Biochemistry and Physiology Part C: Toxicology & Pharmacology, 128(3), pp.425-456.	718.712475	2
Micrurus_pyrrhocryptus	Elapidae	125	Boback, S. M. & Guyer, C. A test of reproductive power in snakes. Ecology 89, 1428-1435 (2008)	432	419	8	Roze J.A. (1996) Coral snakes of the Americas. Biology, identification, and venoms. Krieger Publishing Company, Malabar, Florida.	1.4	im	fish	Synbranchus_marmoratus	da Silva, N.J. and Aird, S.D., 2001. Prey specificity, comparative lethality and compositional differences of coral snake venoms. Comparative Biochemistry and Physiology Part C: Toxicology & Pharmacology, 128(3), pp.425-456.	0	0	0	100	0	0	0	no	da Silva, N.J. and Aird, S.D., 2001. Prey specificity, comparative lethality and compositional differences of coral snake venoms. Comparative Biochemistry and Physiology Part C: Toxicology & Pharmacology, 128(3), pp.425-456.	718.712475	2
Micrurus_pyrrhocryptus	Elapidae	125	Boback, S. M. & Guyer, C. A test of reproductive power in snakes. Ecology 89, 1428-1435 (2008)	432	204.697088	8	Roze J.A. (1996) Coral snakes of the Americas. Biology, identification, and venoms. Krieger Publishing Company, Malabar, Florida.	0.2	ip	lizard	Amphisbaena_cunhai	da Silva, N.J. and Aird, S.D., 2001. Prey specificity, comparative lethality and compositional differences of coral snake venoms. Comparative Biochemistry and Physiology Part C: Toxicology & Pharmacology, 128(3), pp.425-456.	0	0	0	100	0	0	0	no	da Silva, N.J. and Aird, S.D., 2001. Prey specificity, comparative lethality and compositional differences of coral snake venoms. Comparative Biochemistry and Physiology Part C: Toxicology & Pharmacology, 128(3), pp.425-456.	718.712475	2
Micrurus_pyrrhocryptus	Elapidae	125	Boback, S. M. & Guyer, C. A test of reproductive power in snakes. Ecology 89, 1428-1435 (2008)	432	204.697088	8	Roze J.A. (1996) Coral snakes of the Americas. Biology, identification, and venoms. Krieger Publishing Company, Malabar, Florida.	0.4	im	lizard	Amphisbaena_cunhai	da Silva, N.J. and Aird, S.D., 2001. Prey specificity, comparative lethality and compositional differences of coral snake venoms. Comparative Biochemistry and Physiology Part C: Toxicology & Pharmacology, 128(3), pp.425-456.	0	0	0	100	0	0	0	no	da Silva, N.J. and Aird, S.D., 2001. Prey specificity, comparative lethality and compositional differences of coral snake venoms. Comparative Biochemistry and Physiology Part C: Toxicology & Pharmacology, 128(3), pp.425-456.	718.712475	2
Micrurus_pyrrhocryptus	Elapidae	125	Boback, S. M. & Guyer, C. A test of reproductive power in snakes. Ecology 89, 1428-1435 (2008)	432	185.844579	8	Roze J.A. (1996) Coral snakes of the Americas. Biology, identification, and venoms. Krieger Publishing Company, Malabar, Florida.	0.1	ip	lizard	Liophis_typhlus	da Silva, N.J. and Aird, S.D., 2001. Prey specificity, comparative lethality and compositional differences of coral snake venoms. Comparative Biochemistry and Physiology Part C: Toxicology & Pharmacology, 128(3), pp.425-456.	0	0	0	100	0	0	0	no	da Silva, N.J. and Aird, S.D., 2001. Prey specificity, comparative lethality and compositional differences of coral snake venoms. Comparative Biochemistry and Physiology Part C: Toxicology & Pharmacology, 128(3), pp.425-456.	718.712475	2
Micrurus_pyrrhocryptus	Elapidae	125	Boback, S. M. & Guyer, C. A test of reproductive power in snakes. Ecology 89, 1428-1435 (2008)	432	185.844579	8	Roze J.A. (1996) Coral snakes of the Americas. Biology, identification, and venoms. Krieger Publishing Company, Malabar, Florida.	0.3	im	lizard	Liophis_typhlus	da Silva, N.J. and Aird, S.D., 2001. Prey specificity, comparative lethality and compositional differences of coral snake venoms. Comparative Biochemistry and Physiology Part C: Toxicology & Pharmacology, 128(3), pp.425-456.	0	0	0	100	0	0	0	no	da Silva, N.J. and Aird, S.D., 2001. Prey specificity, comparative lethality and compositional differences of coral snake venoms. Comparative Biochemistry and Physiology Part C: Toxicology & Pharmacology, 128(3), pp.425-456.	718.712475	2
Micrurus_spixii	Elapidae	132	Boback, S. M. & Guyer, C. A test of reproductive power in snakes. Ecology 89, 1428-1435 (2008)	492	305.8050004	41	Roze J.A. (1996) Coral snakes of the Americas. Biology, identification, and venoms. Krieger Publishing Company, Malabar, Florida.	0.2	iv	mammal	Mus_musculus	da Silva, N.J. and Aird, S.D., 2001. Prey specificity, comparative lethality and compositional differences of coral snake venoms. Comparative Biochemistry and Physiology Part C: Toxicology & Pharmacology, 128(3), pp.425-456.	0	0	0	100	0	0	0	no	da Silva, N.J. and Aird, S.D., 2001. Prey specificity, comparative lethality and compositional differences of coral snake venoms. Comparative Biochemistry and Physiology Part C: Toxicology & Pharmacology, 128(3), pp.425-456.	767.196661	4
Micrurus_spixii	Elapidae	132	Boback, S. M. & Guyer, C. A test of reproductive power in snakes. Ecology 89, 1428-1435 (2008)	492	305.8050004	41	Roze J.A. (1996) Coral snakes of the Americas. Biology, identification, and venoms. Krieger Publishing Company, Malabar, Florida.	0.4	ip	mammal	Mus_musculus	da Silva, N.J. and Aird, S.D., 2001. Prey specificity, comparative lethality and compositional differences of coral snake venoms. Comparative Biochemistry and Physiology Part C: Toxicology & Pharmacology, 128(3), pp.425-456.	0	0	0	100	0	0	0	no	da Silva, N.J. and Aird, S.D., 2001. Prey specificity, comparative lethality and compositional differences of coral snake venoms. Comparative Biochemistry and Physiology Part C: Toxicology & Pharmacology, 128(3), pp.425-456.	767.196661	4
Micrurus_spixii	Elapidae	132	Boback, S. M. & Guyer, C. A test of reproductive power in snakes. Ecology 89, 1428-1435 (2008)	492	305.8050004	41	Roze J.A. (1996) Coral snakes of the Americas. Biology, identification, and venoms. Krieger Publishing Company, Malabar, Florida.	0.7	im	mammal	Mus_musculus	da Silva, N.J. and Aird, S.D., 2001. Prey specificity, comparative lethality and compositional differences of coral snake venoms. Comparative Biochemistry and Physiology Part C: Toxicology & Pharmacology, 128(3), pp.425-456.	0	0	0	100	0	0	0	no	da Silva, N.J. and Aird, S.D., 2001. Prey specificity, comparative lethality and compositional differences of coral snake venoms. Comparative Biochemistry and Physiology Part C: Toxicology & Pharmacology, 128(3), pp.425-456.	767.196661	4
Micrurus_spixii	Elapidae	132	Boback, S. M. & Guyer, C. A test of reproductive power in snakes. Ecology 89, 1428-1435 (2008)	492	405.0333339	41	Roze J.A. (1996) Coral snakes of the Americas. Biology, identification, and venoms. Krieger Publishing Company, Malabar, Florida.	0.6	ip	fish	Gymnotus_carapo	da Silva, N.J. and Aird, S.D., 2001. Prey specificity, comparative lethality and compositional differences of coral snake venoms. Comparative Biochemistry and Physiology Part C: Toxicology & Pharmacology, 128(3), pp.425-456.	0	0	0	100	0	0	0	no	da Silva, N.J. and Aird, S.D., 2001. Prey specificity, comparative lethality and compositional differences of coral snake venoms. Comparative Biochemistry and Physiology Part C: Toxicology & Pharmacology, 128(3), pp.425-456.	767.196661	4
Micrurus_spixii	Elapidae	132	Boback, S. M. & Guyer, C. A test of reproductive power in snakes. Ecology 89, 1428-1435 (2008)	492	405.0333339	41	Roze J.A. (1996) Coral snakes of the Americas. Biology, identification, and venoms. Krieger Publishing Company, Malabar, Florida.	0.8	im	fish	Gymnotus_carapo	da Silva, N.J. and Aird, S.D., 2001. Prey specificity, comparative lethality and compositional differences of coral snake venoms. Comparative Biochemistry and Physiology Part C: Toxicology & Pharmacology, 128(3), pp.425-456.	0	0	0	100	0	0	0	no	da Silva, N.J. and Aird, S.D., 2001. Prey specificity, comparative lethality and compositional differences of coral snake venoms. Comparative Biochemistry and Physiology Part C: Toxicology & Pharmacology, 128(3), pp.425-456.	767.196661	4
Micrurus_spixii	Elapidae	132	Boback, S. M. & Guyer, C. A test of reproductive power in snakes. Ecology 89, 1428-1435 (2008)	492	405.0333339	41	Roze J.A. (1996) Coral snakes of the Americas. Biology, identification, and venoms. Krieger Publishing Company, Malabar, Florida.	0.5	ip	fish	Synbranchus_marmoratus	da Silva, N.J. and Aird, S.D., 2001. Prey specificity, comparative lethality and compositional differences of coral snake venoms. Comparative Biochemistry and Physiology Part C: Toxicology & Pharmacology, 128(3), pp.425-456.	0	0	0	100	0	0	0	no	da Silva, N.J. and Aird, S.D., 2001. Prey specificity, comparative lethality and compositional differences of coral snake venoms. Comparative Biochemistry and Physiology Part C: Toxicology & Pharmacology, 128(3), pp.425-456.	767.196661	4
Micrurus_spixii	Elapidae	132	Boback, S. M. & Guyer, C. A test of reproductive power in snakes. Ecology 89, 1428-1435 (2008)	492	405.0333339	41	Roze J.A. (1996) Coral snakes of the Americas. Biology, identification, and venoms. Krieger Publishing Company, Malabar, Florida.	0.7	im	fish	Synbranchus_marmoratus	da Silva, N.J. and Aird, S.D., 2001. Prey specificity, comparative lethality and compositional differences of coral snake venoms. Comparative Biochemistry and Physiology Part C: Toxicology & Pharmacology, 128(3), pp.425-456.	0	0	0	100	0	0	0	no	da Silva, N.J. and Aird, S.D., 2001. Prey specificity, comparative lethality and compositional differences of coral snake venoms. Comparative Biochemistry and Physiology Part C: Toxicology & Pharmacology, 128(3), pp.425-456.	767.196661	4
Micrurus_spixii	Elapidae	132	Boback, S. M. & Guyer, C. A test of reproductive power in snakes. Ecology 89, 1428-1435 (2008)	492	229.0286871	41	Roze J.A. (1996) Coral snakes of the Americas. Biology, identification, and venoms. Krieger Publishing Company, Malabar, Florida.	0.5	ip	lizard	Amphisbaena_cunhai	da Silva, N.J. and Aird, S.D., 2001. Prey specificity, comparative lethality and compositional differences of coral snake venoms. Comparative Biochemistry and Physiology Part C: Toxicology & Pharmacology, 128(3), pp.425-456.	0	0	0	100	0	0	0	no	da Silva, N.J. and Aird, S.D., 2001. Prey specificity, comparative lethality and compositional differences of coral snake venoms. Comparative Biochemistry and Physiology Part C: Toxicology & Pharmacology, 128(3), pp.425-456.	767.196661	4
Micrurus_spixii	Elapidae	132	Boback, S. M. & Guyer, C. A test of reproductive power in snakes. Ecology 89, 1428-1435 (2008)	492	229.0286871	41	Roze J.A. (1996) Coral snakes of the Americas. Biology, identification, and venoms. Krieger Publishing Company, Malabar, Florida.	0.7	im	lizard	Amphisbaena_cunhai	da Silva, N.J. and Aird, S.D., 2001. Prey specificity, comparative lethality and compositional differences of coral snake venoms. Comparative Biochemistry and Physiology Part C: Toxicology & Pharmacology, 128(3), pp.425-456.	0	0	0	100	0	0	0	no	da Silva, N.J. and Aird, S.D., 2001. Prey specificity, comparative lethality and compositional differences of coral snake venoms. Comparative Biochemistry and Physiology Part C: Toxicology & Pharmacology, 128(3), pp.425-456.	767.196661	4
Micrurus_spixii	Elapidae	132	Boback, S. M. & Guyer, C. A test of reproductive power in snakes. Ecology 89, 1428-1435 (2008)	492	121.3662495	41	Roze J.A. (1996) Coral snakes of the Americas. Biology, identification, and venoms. Krieger Publishing Company, Malabar, Florida.	0.2	ip	lizard	Liophis_typhlus	da Silva, N.J. and Aird, S.D., 2001. Prey specificity, comparative lethality and compositional differences of coral snake venoms. Comparative Biochemistry and Physiology Part C: Toxicology & Pharmacology, 128(3), pp.425-456.	0	0	0	100	0	0	0	no	da Silva, N.J. and Aird, S.D., 2001. Prey specificity, comparative lethality and compositional differences of coral snake venoms. Comparative Biochemistry and Physiology Part C: Toxicology & Pharmacology, 128(3), pp.425-456.	767.196661	4
Micrurus_spixii	Elapidae	132	Boback, S. M. & Guyer, C. A test of reproductive power in snakes. Ecology 89, 1428-1435 (2008)	492	121.3662495	41	Roze J.A. (1996) Coral snakes of the Americas. Biology, identification, and venoms. Krieger Publishing Company, Malabar, Florida.	0.5	im	lizard	Liophis_typhlus	da Silva, N.J. and Aird, S.D., 2001. Prey specificity, comparative lethality and compositional differences of coral snake venoms. Comparative Biochemistry and Physiology Part C: Toxicology & Pharmacology, 128(3), pp.425-456.	0	0	0	100	0	0	0	no	da Silva, N.J. and Aird, S.D., 2001. Prey specificity, comparative lethality and compositional differences of coral snake venoms. Comparative Biochemistry and Physiology Part C: Toxicology & Pharmacology, 128(3), pp.425-456.	767.196661	4
Micrurus_spixii	Elapidae	132	Boback, S. M. & Guyer, C. A test of reproductive power in snakes. Ecology 89, 1428-1435 (2008)	492	305.8050004	41	Roze J.A. (1996) Coral snakes of the Americas. Biology, identification, and venoms. Krieger Publishing Company, Malabar, Florida.	1.6	ip	mammal	Mus_musculus	Handbook of Natural Toxins: Reptile Venoms and Toxins	0	0	0	100	0	0	0	no	da Silva, N.J. and Aird, S.D., 2001. Prey specificity, comparative lethality and compositional differences of coral snake venoms. Comparative Biochemistry and Physiology Part C: Toxicology & Pharmacology, 128(3), pp.425-456.	767.196661	4
Micrurus_surinamensis	Elapidae	124	Boback, S. M. & Guyer, C. A test of reproductive power in snakes. Ecology 89, 1428-1435 (2008)	424	414.81	56	Roze J.A. (1996) Coral snakes of the Americas. Biology, identification, and venoms. Krieger Publishing Company, Malabar, Florida.	0.3	iv	mammal	Mus_musculus	da Silva, N.J. and Aird, S.D., 2001. Prey specificity, comparative lethality and compositional differences of coral snake venoms. Comparative Biochemistry and Physiology Part C: Toxicology & Pharmacology, 128(3), pp.425-456.	100	0	0	0	0	0	0	no	da Silva, N.J. and Aird, S.D., 2001. Prey specificity, comparative lethality and compositional differences of coral snake venoms. Comparative Biochemistry and Physiology Part C: Toxicology & Pharmacology, 128(3), pp.425-456.	858.384115	3
Micrurus_surinamensis	Elapidae	124	Boback, S. M. & Guyer, C. A test of reproductive power in snakes. Ecology 89, 1428-1435 (2008)	424	414.81	56	Roze J.A. (1996) Coral snakes of the Americas. Biology, identification, and venoms. Krieger Publishing Company, Malabar, Florida.	0.5	ip	mammal	Mus_musculus	da Silva, N.J. and Aird, S.D., 2001. Prey specificity, comparative lethality and compositional differences of coral snake venoms. Comparative Biochemistry and Physiology Part C: Toxicology & Pharmacology, 128(3), pp.425-456.	100	0	0	0	0	0	0	no	da Silva, N.J. and Aird, S.D., 2001. Prey specificity, comparative lethality and compositional differences of coral snake venoms. Comparative Biochemistry and Physiology Part C: Toxicology & Pharmacology, 128(3), pp.425-456.	858.384115	3
Micrurus_surinamensis	Elapidae	124	Boback, S. M. & Guyer, C. A test of reproductive power in snakes. Ecology 89, 1428-1435 (2008)	424	414.81	56	Roze J.A. (1996) Coral snakes of the Americas. Biology, identification, and venoms. Krieger Publishing Company, Malabar, Florida.	0.7	im	mammal	Mus_musculus	da Silva, N.J. and Aird, S.D., 2001. Prey specificity, comparative lethality and compositional differences of coral snake venoms. Comparative Biochemistry and Physiology Part C: Toxicology & Pharmacology, 128(3), pp.425-456.	100	0	0	0	0	0	0	no	da Silva, N.J. and Aird, S.D., 2001. Prey specificity, comparative lethality and compositional differences of coral snake venoms. Comparative Biochemistry and Physiology Part C: Toxicology & Pharmacology, 128(3), pp.425-456.	858.384115	3
Micrurus_surinamensis	Elapidae	124	Boback, S. M. & Guyer, C. A test of reproductive power in snakes. Ecology 89, 1428-1435 (2008)	424	125.367	56	Roze J.A. (1996) Coral snakes of the Americas. Biology, identification, and venoms. Krieger Publishing Company, Malabar, Florida.	0.09	ip	fish	Gymnotus_carapo	da Silva, N.J. and Aird, S.D., 2001. Prey specificity, comparative lethality and compositional differences of coral snake venoms. Comparative Biochemistry and Physiology Part C: Toxicology & Pharmacology, 128(3), pp.425-456.	100	0	0	0	0	0	0	no	da Silva, N.J. and Aird, S.D., 2001. Prey specificity, comparative lethality and compositional differences of coral snake venoms. Comparative Biochemistry and Physiology Part C: Toxicology & Pharmacology, 128(3), pp.425-456.	858.384115	3
Micrurus_surinamensis	Elapidae	124	Boback, S. M. & Guyer, C. A test of reproductive power in snakes. Ecology 89, 1428-1435 (2008)	424	125.367	56	Roze J.A. (1996) Coral snakes of the Americas. Biology, identification, and venoms. Krieger Publishing Company, Malabar, Florida.	0.15	im	fish	Gymnotus_carapo	da Silva, N.J. and Aird, S.D., 2001. Prey specificity, comparative lethality and compositional differences of coral snake venoms. Comparative Biochemistry and Physiology Part C: Toxicology & Pharmacology, 128(3), pp.425-456.	100	0	0	0	0	0	0	no	da Silva, N.J. and Aird, S.D., 2001. Prey specificity, comparative lethality and compositional differences of coral snake venoms. Comparative Biochemistry and Physiology Part C: Toxicology & Pharmacology, 128(3), pp.425-456.	858.384115	3
Micrurus_surinamensis	Elapidae	124	Boback, S. M. & Guyer, C. A test of reproductive power in snakes. Ecology 89, 1428-1435 (2008)	424	151.734	56	Roze J.A. (1996) Coral snakes of the Americas. Biology, identification, and venoms. Krieger Publishing Company, Malabar, Florida.	0.015	ip	fish	Synbranchus_marmoratus	da Silva, N.J. and Aird, S.D., 2001. Prey specificity, comparative lethality and compositional differences of coral snake venoms. Comparative Biochemistry and Physiology Part C: Toxicology & Pharmacology, 128(3), pp.425-456.	100	0	0	0	0	0	0	no	da Silva, N.J. and Aird, S.D., 2001. Prey specificity, comparative lethality and compositional differences of coral snake venoms. Comparative Biochemistry and Physiology Part C: Toxicology & Pharmacology, 128(3), pp.425-456.	858.384115	3
Micrurus_surinamensis	Elapidae	124	Boback, S. M. & Guyer, C. A test of reproductive power in snakes. Ecology 89, 1428-1435 (2008)	424	151.734	56	Roze J.A. (1996) Coral snakes of the Americas. Biology, identification, and venoms. Krieger Publishing Company, Malabar, Florida.	0.035	im	fish	Synbranchus_marmoratus	da Silva, N.J. and Aird, S.D., 2001. Prey specificity, comparative lethality and compositional differences of coral snake venoms. Comparative Biochemistry and Physiology Part C: Toxicology & Pharmacology, 128(3), pp.425-456.	100	0	0	0	0	0	0	no	da Silva, N.J. and Aird, S.D., 2001. Prey specificity, comparative lethality and compositional differences of coral snake venoms. Comparative Biochemistry and Physiology Part C: Toxicology & Pharmacology, 128(3), pp.425-456.	858.384115	3
Micrurus_surinamensis	Elapidae	124	Boback, S. M. & Guyer, C. A test of reproductive power in snakes. Ecology 89, 1428-1435 (2008)	424	414.81	56	Roze J.A. (1996) Coral snakes of the Americas. Biology, identification, and venoms. Krieger Publishing Company, Malabar, Florida.	0.2	ip	lizard	Amphisbaena_cunhai	da Silva, N.J. and Aird, S.D., 2001. Prey specificity, comparative lethality and compositional differences of coral snake venoms. Comparative Biochemistry and Physiology Part C: Toxicology & Pharmacology, 128(3), pp.425-456.	100	0	0	0	0	0	0	no	da Silva, N.J. and Aird, S.D., 2001. Prey specificity, comparative lethality and compositional differences of coral snake venoms. Comparative Biochemistry and Physiology Part C: Toxicology & Pharmacology, 128(3), pp.425-456.	858.384115	3
Micrurus_surinamensis	Elapidae	124	Boback, S. M. & Guyer, C. A test of reproductive power in snakes. Ecology 89, 1428-1435 (2008)	424	414.81	56	Roze J.A. (1996) Coral snakes of the Americas. Biology, identification, and venoms. Krieger Publishing Company, Malabar, Florida.	0.45	im	lizard	Amphisbaena_cunhai	da Silva, N.J. and Aird, S.D., 2001. Prey specificity, comparative lethality and compositional differences of coral snake venoms. Comparative Biochemistry and Physiology Part C: Toxicology & Pharmacology, 128(3), pp.425-456.	100	0	0	0	0	0	0	no	da Silva, N.J. and Aird, S.D., 2001. Prey specificity, comparative lethality and compositional differences of coral snake venoms. Comparative Biochemistry and Physiology Part C: Toxicology & Pharmacology, 128(3), pp.425-456.	858.384115	3
Micrurus_surinamensis	Elapidae	124	Boback, S. M. & Guyer, C. A test of reproductive power in snakes. Ecology 89, 1428-1435 (2008)	424	414.81	56	Roze J.A. (1996) Coral snakes of the Americas. Biology, identification, and venoms. Krieger Publishing Company, Malabar, Florida.	0.35	ip	lizard	Liophis_typhlus	da Silva, N.J. and Aird, S.D., 2001. Prey specificity, comparative lethality and compositional differences of coral snake venoms. Comparative Biochemistry and Physiology Part C: Toxicology & Pharmacology, 128(3), pp.425-456.	100	0	0	0	0	0	0	no	da Silva, N.J. and Aird, S.D., 2001. Prey specificity, comparative lethality and compositional differences of coral snake venoms. Comparative Biochemistry and Physiology Part C: Toxicology & Pharmacology, 128(3), pp.425-456.	858.384115	3
Micrurus_surinamensis	Elapidae	124	Boback, S. M. & Guyer, C. A test of reproductive power in snakes. Ecology 89, 1428-1435 (2008)	424	414.81	56	Roze J.A. (1996) Coral snakes of the Americas. Biology, identification, and venoms. Krieger Publishing Company, Malabar, Florida.	0.55	im	lizard	Liophis_typhlus	da Silva, N.J. and Aird, S.D., 2001. Prey specificity, comparative lethality and compositional differences of coral snake venoms. Comparative Biochemistry and Physiology Part C: Toxicology & Pharmacology, 128(3), pp.425-456.	100	0	0	0	0	0	0	no	da Silva, N.J. and Aird, S.D., 2001. Prey specificity, comparative lethality and compositional differences of coral snake venoms. Comparative Biochemistry and Physiology Part C: Toxicology & Pharmacology, 128(3), pp.425-456.	858.384115	3
Naja_melanoleuca	Elapidae	263	Boback, S. M. & Guyer, C. A test of reproductive power in snakes. Ecology 89, 1428-1435 (2008)	2587	226.8265897	571	Mirtschin, P.J., Dunstan, N., Hough, B., Hamilton, E., Klein, S., Lucas, J., Millar, D., Madaras, F. and Nias, T., 2006. Venom yields from Australian and some other species of snakes. Ecotoxicology, 15(6), pp.531-538.	0.6	ip	mammal	Mus_musculus	Kabara, J.J. and Fischer, G., 1972. Methodology for the isolation of low molecular weight toxins from snake venoms. Toxicon, 10(3), pp.227-238.	25	0	20.2	2.4	6.5	0	45.9	no	Luiselli, L., Angelici, F.M. and Akani, G.C., 2002. Comparative feeding strategies and dietary plasticity of the sympatric cobras Naja melanoleuca and Naja nigricollis in three diverging Afrotropical habitats. Canadian Journal of Zoology, 80(1), pp.55-63.	2609.902345	17
Naja_melanoleuca	Elapidae	263	Boback, S. M. & Guyer, C. A test of reproductive power in snakes. Ecology 89, 1428-1435 (2008)	2587	226.8265897	571	Mirtschin, P.J., Dunstan, N., Hough, B., Hamilton, E., Klein, S., Lucas, J., Millar, D., Madaras, F. and Nias, T., 2006. Venom yields from Australian and some other species of snakes. Ecotoxicology, 15(6), pp.531-538.	0.225	sc	mammal	Mus_musculus	Minton, SA (1967). Paraspecific protection by elapid and sea snake antivenins. Toxicon 5 (1): 47_55. doi:10.1016/0041-0101(67)90118-3.	25	0	20.2	2.4	6.5	0	45.9	no	Luiselli, L., Angelici, F.M. and Akani, G.C., 2002. Comparative feeding strategies and dietary plasticity of the sympatric cobras Naja melanoleuca and Naja nigricollis in three diverging Afrotropical habitats. Canadian Journal of Zoology, 80(1), pp.55-63.	2609.902345	17
Naja_naja	Elapidae	150	de Queiroz, A. & Rodr�guez_Robles, J. A. Historical contingency and animal diets: the origins of egg eating in snakes. The American Naturalist 167, 684-694 (2006).	670	294.204545	189	Broad, A. J., Sutherland, S. K., Coulter, A.R. (1979). The lethality in mice of dangerous Australian and other snake venoms. Toxicon (17). 664-667. 11. ; Minton S.A. (1974) Venom Diseases. Ed. Thomas C.C., Springfield, Illinois.	0.18	iv	mammal	Mus_musculus	Theakston, R.D.G. and Reid, H.A., 1983. Development of simple standard assay procedures for the characterization of snake venoms. Bulletin of the world health organization, 61(6), p.949.	5	0	5	36	36	0	18	no	Mao, S.H., 1970. Food of the common venomous snakes of Taiwan. Herpetologica, pp.45-48.	1724.003124	6
Naja_naja	Elapidae	150	de Queiroz, A. & Rodr�guez_Robles, J. A. Historical contingency and animal diets: the origins of egg eating in snakes. The American Naturalist 167, 684-694 (2006).	670	294.204545	189	Broad, A. J., Sutherland, S. K., Coulter, A.R. (1979). The lethality in mice of dangerous Australian and other snake venoms. Toxicon (17). 664-667. 11. ; Minton S.A. (1974) Venom Diseases. Ed. Thomas C.C., Springfield, Illinois.	0.565	sc	mammal	Mus_musculus	Broad, A. J., Sutherland, S. K., Coulter, A.R. (1979). The lethality in mice of dangerous Australian and other snake venoms. Toxicon (17). 664-667. 11.	5	0	5	36	36	0	18	no	Mao, S.H., 1970. Food of the common venomous snakes of Taiwan. Herpetologica, pp.45-48.	1724.003124	6
Naja_naja	Elapidae	150	de Queiroz, A. & Rodr�guez_Robles, J. A. Historical contingency and animal diets: the origins of egg eating in snakes. The American Naturalist 167, 684-694 (2006).	670	294.204545	189	Broad, A. J., Sutherland, S. K., Coulter, A.R. (1979). The lethality in mice of dangerous Australian and other snake venoms. Toxicon (17). 664-667. 11. ; Minton S.A. (1974) Venom Diseases. Ed. Thomas C.C., Springfield, Illinois.	0.8	iv	mammal	Mus_musculus	Theakston, R.D.G. and Reid, H.A., 1983. Development of simple standard assay procedures for the characterization of snake venoms. Bulletin of the world health organization, 61(6), p.949.	5	0	5	36	36	0	18	no	Mao, S.H., 1970. Food of the common venomous snakes of Taiwan. Herpetologica, pp.45-48.	1724.003124	6
Naja_naja	Elapidae	150	de Queiroz, A. & Rodr�guez_Robles, J. A. Historical contingency and animal diets: the origins of egg eating in snakes. The American Naturalist 167, 684-694 (2006).	670	294.204545	189	Broad, A. J., Sutherland, S. K., Coulter, A.R. (1979). The lethality in mice of dangerous Australian and other snake venoms. Toxicon (17). 664-667. 11. ; Minton S.A. (1974) Venom Diseases. Ed. Thomas C.C., Springfield, Illinois.	0.7	ip	mammal	Mus_musculus	Lee 1971 Mode of Action of Cobra Venom and Its Purified Toxins	5	0	5	36	36	0	18	no	Mao, S.H., 1970. Food of the common venomous snakes of Taiwan. Herpetologica, pp.45-48.	1724.003124	6
Naja_naja	Elapidae	150	de Queiroz, A. & Rodr�guez_Robles, J. A. Historical contingency and animal diets: the origins of egg eating in snakes. The American Naturalist 167, 684-694 (2006).	670	294.204545	189	Broad, A. J., Sutherland, S. K., Coulter, A.R. (1979). The lethality in mice of dangerous Australian and other snake venoms. Toxicon (17). 664-667. 11. ; Minton S.A. (1974) Venom Diseases. Ed. Thomas C.C., Springfield, Illinois.	0.35	ip	mammal	Mus_musculus	Lee 1971 Mode of Action of Cobra Venom and Its Purified Toxins	5	0	5	36	36	0	18	no	Mao, S.H., 1970. Food of the common venomous snakes of Taiwan. Herpetologica, pp.45-48.	1724.003124	6
Naja_naja	Elapidae	150	de Queiroz, A. & Rodr�guez_Robles, J. A. Historical contingency and animal diets: the origins of egg eating in snakes. The American Naturalist 167, 684-694 (2006).	670	294.204545	189	Broad, A. J., Sutherland, S. K., Coulter, A.R. (1979). The lethality in mice of dangerous Australian and other snake venoms. Toxicon (17). 664-667. 11. ; Minton S.A. (1974) Venom Diseases. Ed. Thomas C.C., Springfield, Illinois.	0.45	sc	mammal	Mus_musculus	Christensen 1966	5	0	5	36	36	0	18	no	Mao, S.H., 1970. Food of the common venomous snakes of Taiwan. Herpetologica, pp.45-48.	1724.003124	6
Naja_naja	Elapidae	150	de Queiroz, A. & Rodr�guez_Robles, J. A. Historical contingency and animal diets: the origins of egg eating in snakes. The American Naturalist 167, 684-694 (2006).	670	294.204545	189	Broad, A. J., Sutherland, S. K., Coulter, A.R. (1979). The lethality in mice of dangerous Australian and other snake venoms. Toxicon (17). 664-667. 11. ; Minton S.A. (1974) Venom Diseases. Ed. Thomas C.C., Springfield, Illinois.	0.45	sc	mammal	Mus_musculus	Minton, SA (1967). Paraspecific protection by elapid and sea snake antivenins. Toxicon 5 (1): 47_55. doi:10.1016/0041-0101(67)90118-3.	5	0	5	36	36	0	18	no	Mao, S.H., 1970. Food of the common venomous snakes of Taiwan. Herpetologica, pp.45-48.	1724.003124	6
Naja_naja	Elapidae	150	de Queiroz, A. & Rodr�guez_Robles, J. A. Historical contingency and animal diets: the origins of egg eating in snakes. The American Naturalist 167, 684-694 (2006).	670	294.204545	189	Broad, A. J., Sutherland, S. K., Coulter, A.R. (1979). The lethality in mice of dangerous Australian and other snake venoms. Toxicon (17). 664-667. 11. ; Minton S.A. (1974) Venom Diseases. Ed. Thomas C.C., Springfield, Illinois.	0.24	sc	mammal	Mus_musculus	Minton, SA (1967). Paraspecific protection by elapid and sea snake antivenins. Toxicon 5 (1): 47_55. doi:10.1016/0041-0101(67)90118-3.	5	0	5	36	36	0	18	no	Mao, S.H., 1970. Food of the common venomous snakes of Taiwan. Herpetologica, pp.45-48.	1724.003124	6
Naja_naja	Elapidae	150	de Queiroz, A. & Rodr�guez_Robles, J. A. Historical contingency and animal diets: the origins of egg eating in snakes. The American Naturalist 167, 684-694 (2006).	670	294.204545	189	Broad, A. J., Sutherland, S. K., Coulter, A.R. (1979). The lethality in mice of dangerous Australian and other snake venoms. Toxicon (17). 664-667. 11. ; Minton S.A. (1974) Venom Diseases. Ed. Thomas C.C., Springfield, Illinois.	0.28	sc	mammal	Mus_musculus	Minton, SA (1967). Paraspecific protection by elapid and sea snake antivenins. Toxicon 5 (1): 47_55. doi:10.1016/0041-0101(67)90118-3.	5	0	5	36	36	0	18	no	Mao, S.H., 1970. Food of the common venomous snakes of Taiwan. Herpetologica, pp.45-48.	1724.003124	6
Naja_naja	Elapidae	150	de Queiroz, A. & Rodr�guez_Robles, J. A. Historical contingency and animal diets: the origins of egg eating in snakes. The American Naturalist 167, 684-694 (2006).	670	249.3181814	189	Broad, A. J., Sutherland, S. K., Coulter, A.R. (1979). The lethality in mice of dangerous Australian and other snake venoms. Toxicon (17). 664-667. 11. ; Minton S.A. (1974) Venom Diseases. Ed. Thomas C.C., Springfield, Illinois.	0.28	im	bird	Columba_sp	Lee, C.Y. and Tseng, L.F., 1969. Species differences in susceptibility to elapid venoms. Toxicon, 7(2), pp.89-93.	5	0	5	36	36	0	18	no	Mao, S.H., 1970. Food of the common venomous snakes of Taiwan. Herpetologica, pp.45-48.	1724.003124	6
Naja_naja	Elapidae	150	de Queiroz, A. & Rodr�guez_Robles, J. A. Historical contingency and animal diets: the origins of egg eating in snakes. The American Naturalist 167, 684-694 (2006).	670	249.3181814	189	Broad, A. J., Sutherland, S. K., Coulter, A.R. (1979). The lethality in mice of dangerous Australian and other snake venoms. Toxicon (17). 664-667. 11. ; Minton S.A. (1974) Venom Diseases. Ed. Thomas C.C., Springfield, Illinois.	0.43	im	bird	Gallus_domesticus	Lee, C.Y. and Tseng, L.F., 1969. Species differences in susceptibility to elapid venoms. Toxicon, 7(2), pp.89-93.	5	0	5	36	36	0	18	no	Mao, S.H., 1970. Food of the common venomous snakes of Taiwan. Herpetologica, pp.45-48.	1724.003124	6
Naja_naja	Elapidae	150	de Queiroz, A. & Rodr�guez_Robles, J. A. Historical contingency and animal diets: the origins of egg eating in snakes. The American Naturalist 167, 684-694 (2006).	670	249.3181814	189	Broad, A. J., Sutherland, S. K., Coulter, A.R. (1979). The lethality in mice of dangerous Australian and other snake venoms. Toxicon (17). 664-667. 11. ; Minton S.A. (1974) Venom Diseases. Ed. Thomas C.C., Springfield, Illinois.	0.7	im	bird	Lonchura_striata	Lee, C.Y. and Tseng, L.F., 1969. Species differences in susceptibility to elapid venoms. Toxicon, 7(2), pp.89-93.	5	0	5	36	36	0	18	no	Mao, S.H., 1970. Food of the common venomous snakes of Taiwan. Herpetologica, pp.45-48.	1724.003124	6
Naja_naja	Elapidae	150	de Queiroz, A. & Rodr�guez_Robles, J. A. Historical contingency and animal diets: the origins of egg eating in snakes. The American Naturalist 167, 684-694 (2006).	670	294.204545	189	Broad, A. J., Sutherland, S. K., Coulter, A.R. (1979). The lethality in mice of dangerous Australian and other snake venoms. Toxicon (17). 664-667. 11. ; Minton S.A. (1974) Venom Diseases. Ed. Thomas C.C., Springfield, Illinois.	0.67	im	mammal	Mus_musculus	Lee, C.Y. and Tseng, L.F., 1969. Species differences in susceptibility to elapid venoms. Toxicon, 7(2), pp.89-93.	5	0	5	36	36	0	18	no	Mao, S.H., 1970. Food of the common venomous snakes of Taiwan. Herpetologica, pp.45-48.	1724.003124	6
Naja_naja	Elapidae	150	de Queiroz, A. & Rodr�guez_Robles, J. A. Historical contingency and animal diets: the origins of egg eating in snakes. The American Naturalist 167, 684-694 (2006).	670	294.204545	189	Broad, A. J., Sutherland, S. K., Coulter, A.R. (1979). The lethality in mice of dangerous Australian and other snake venoms. Toxicon (17). 664-667. 11. ; Minton S.A. (1974) Venom Diseases. Ed. Thomas C.C., Springfield, Illinois.	0.26	ip	mammal	Mus_musculus	Mohamed et al 1974	5	0	5	36	36	0	18	no	Mao, S.H., 1970. Food of the common venomous snakes of Taiwan. Herpetologica, pp.45-48.	1724.003124	6
Naja_naja	Elapidae	150	de Queiroz, A. & Rodr�guez_Robles, J. A. Historical contingency and animal diets: the origins of egg eating in snakes. The American Naturalist 167, 684-694 (2006).	670	294.204545	189	Broad, A. J., Sutherland, S. K., Coulter, A.R. (1979). The lethality in mice of dangerous Australian and other snake venoms. Toxicon (17). 664-667. 11. ; Minton S.A. (1974) Venom Diseases. Ed. Thomas C.C., Springfield, Illinois.	0.172	ip	mammal	Mus_musculus	Mohamed et al 1973	5	0	5	36	36	0	18	no	Mao, S.H., 1970. Food of the common venomous snakes of Taiwan. Herpetologica, pp.45-48.	1724.003124	6
Naja_naja	Elapidae	150	de Queiroz, A. & Rodr�guez_Robles, J. A. Historical contingency and animal diets: the origins of egg eating in snakes. The American Naturalist 167, 684-694 (2006).	670	294.204545	189	Broad, A. J., Sutherland, S. K., Coulter, A.R. (1979). The lethality in mice of dangerous Australian and other snake venoms. Toxicon (17). 664-667. 11. ; Minton S.A. (1974) Venom Diseases. Ed. Thomas C.C., Springfield, Illinois.	0.48	ip	mammal	Mus_musculus	Carey and Wright 1960	5	0	5	36	36	0	18	no	Mao, S.H., 1970. Food of the common venomous snakes of Taiwan. Herpetologica, pp.45-48.	1724.003124	6
Naja_naja	Elapidae	150	de Queiroz, A. & Rodr�guez_Robles, J. A. Historical contingency and animal diets: the origins of egg eating in snakes. The American Naturalist 167, 684-694 (2006).	670	294.204545	189	Broad, A. J., Sutherland, S. K., Coulter, A.R. (1979). The lethality in mice of dangerous Australian and other snake venoms. Toxicon (17). 664-667. 11. ; Minton S.A. (1974) Venom Diseases. Ed. Thomas C.C., Springfield, Illinois.	0.13	iv	mammal	Mus_musculus	Friederich and Tu 1971	5	0	5	36	36	0	18	no	Mao, S.H., 1970. Food of the common venomous snakes of Taiwan. Herpetologica, pp.45-48.	1724.003124	6
Naja_naja	Elapidae	150	de Queiroz, A. & Rodr�guez_Robles, J. A. Historical contingency and animal diets: the origins of egg eating in snakes. The American Naturalist 167, 684-694 (2006).	670	294.204545	189	Broad, A. J., Sutherland, S. K., Coulter, A.R. (1979). The lethality in mice of dangerous Australian and other snake venoms. Toxicon (17). 664-667. 11. ; Minton S.A. (1974) Venom Diseases. Ed. Thomas C.C., Springfield, Illinois.	0.29	iv	mammal	Mus_musculus	Friederich and Tu 1971	5	0	5	36	36	0	18	no	Mao, S.H., 1970. Food of the common venomous snakes of Taiwan. Herpetologica, pp.45-48.	1724.003124	6
Naja_naja	Elapidae	150	de Queiroz, A. & Rodr�guez_Robles, J. A. Historical contingency and animal diets: the origins of egg eating in snakes. The American Naturalist 167, 684-694 (2006).	670	294.204545	189	Broad, A. J., Sutherland, S. K., Coulter, A.R. (1979). The lethality in mice of dangerous Australian and other snake venoms. Toxicon (17). 664-667. 11. ; Minton S.A. (1974) Venom Diseases. Ed. Thomas C.C., Springfield, Illinois.	0.34	ip	mammal	Mus_musculus	Kabara, J.J. and Fischer, G., 1972. Methodology for the isolation of low molecular weight toxins from snake venoms. Toxicon, 10(3), pp.227-238.	5	0	5	36	36	0	18	no	Mao, S.H., 1970. Food of the common venomous snakes of Taiwan. Herpetologica, pp.45-48.	1724.003124	6
Naja_naja	Elapidae	150	de Queiroz, A. & Rodr�guez_Robles, J. A. Historical contingency and animal diets: the origins of egg eating in snakes. The American Naturalist 167, 684-694 (2006).	670	294.204545	189	Broad, A. J., Sutherland, S. K., Coulter, A.R. (1979). The lethality in mice of dangerous Australian and other snake venoms. Toxicon (17). 664-667. 11. ; Minton S.A. (1974) Venom Diseases. Ed. Thomas C.C., Springfield, Illinois.	0.6	ip	mammal	Mus_musculus	Kabara, J.J. and Fischer, G., 1972. Methodology for the isolation of low molecular weight toxins from snake venoms. Toxicon, 10(3), pp.227-238.	5	0	5	36	36	0	18	no	Mao, S.H., 1970. Food of the common venomous snakes of Taiwan. Herpetologica, pp.45-48.	1724.003124	6
Naja_naja	Elapidae	150	de Queiroz, A. & Rodr�guez_Robles, J. A. Historical contingency and animal diets: the origins of egg eating in snakes. The American Naturalist 167, 684-694 (2006).	670	294.204545	189	Broad, A. J., Sutherland, S. K., Coulter, A.R. (1979). The lethality in mice of dangerous Australian and other snake venoms. Toxicon (17). 664-667. 11. ; Minton S.A. (1974) Venom Diseases. Ed. Thomas C.C., Springfield, Illinois.	0.35	ip	mammal	Mus_musculus	Kabara, J.J. and Fischer, G., 1972. Methodology for the isolation of low molecular weight toxins from snake venoms. Toxicon, 10(3), pp.227-238.	5	0	5	36	36	0	18	no	Mao, S.H., 1970. Food of the common venomous snakes of Taiwan. Herpetologica, pp.45-48.	1724.003124	6
Naja_naja	Elapidae	150	de Queiroz, A. & Rodr�guez_Robles, J. A. Historical contingency and animal diets: the origins of egg eating in snakes. The American Naturalist 167, 684-694 (2006).	670	294.204545	189	Broad, A. J., Sutherland, S. K., Coulter, A.R. (1979). The lethality in mice of dangerous Australian and other snake venoms. Toxicon (17). 664-667. 11. ; Minton S.A. (1974) Venom Diseases. Ed. Thomas C.C., Springfield, Illinois.	0.31	ip	mammal	Mus_musculus	Kabara, J.J. and Fischer, G., 1972. Methodology for the isolation of low molecular weight toxins from snake venoms. Toxicon, 10(3), pp.227-238.	5	0	5	36	36	0	18	no	Mao, S.H., 1970. Food of the common venomous snakes of Taiwan. Herpetologica, pp.45-48.	1724.003124	6
Naja_naja	Elapidae	150	de Queiroz, A. & Rodr�guez_Robles, J. A. Historical contingency and animal diets: the origins of egg eating in snakes. The American Naturalist 167, 684-694 (2006).	670	294.204545	189	Broad, A. J., Sutherland, S. K., Coulter, A.R. (1979). The lethality in mice of dangerous Australian and other snake venoms. Toxicon (17). 664-667. 11. ; Minton S.A. (1974) Venom Diseases. Ed. Thomas C.C., Springfield, Illinois.	0.35	ip	mammal	Mus_musculus	Kabara, J.J. and Fischer, G., 1972. Methodology for the isolation of low molecular weight toxins from snake venoms. Toxicon, 10(3), pp.227-238.	5	0	5	36	36	0	18	no	Mao, S.H., 1970. Food of the common venomous snakes of Taiwan. Herpetologica, pp.45-48.	1724.003124	6
Naja_nigricollis	Elapidae	282	Boback, S. M. & Guyer, C. A test of reproductive power in snakes. Ecology 89, 1428-1435 (2008)	3060	253.9747192	275	Minton S.A. (1974) Venom Diseases. Ed. Thomas C.C., Springfield, Illinois.	1.34	iv	mammal	Mus_musculus	Theakston, R.D.G. and Reid, H.A., 1983. Development of simple standard assay procedures for the characterization of snake venoms. Bulletin of the world health organization, 61(6), p.949.	0	0	12.2	36.6	11	0	40.2	no	Luiselli, L., Angelici, F.M. and Akani, G.C., 2002. Comparative feeding strategies and dietary plasticity of the sympatric cobras Naja melanoleuca and Naja nigricollis in three diverging Afrotropical habitats. Canadian Journal of Zoology, 80(1), pp.55-63.	2280.30079	12
Naja_nigricollis	Elapidae	282	Boback, S. M. & Guyer, C. A test of reproductive power in snakes. Ecology 89, 1428-1435 (2008)	3060	253.9747192	275	Minton S.A. (1974) Venom Diseases. Ed. Thomas C.C., Springfield, Illinois.	1.67	ip	mammal	Mus_musculus	Abdel_Aal, A. and Abdel-Baset, A., 2010. Venom yield and toxicities of six Egyptian snakes with a description of a procedure for estimating the amount of venom ejected by a single snake bite. Scientific Journal of King Faisal University (Basic and Applied	0	0	12.2	36.6	11	0	40.2	no	Luiselli, L., Angelici, F.M. and Akani, G.C., 2002. Comparative feeding strategies and dietary plasticity of the sympatric cobras Naja melanoleuca and Naja nigricollis in three diverging Afrotropical habitats. Canadian Journal of Zoology, 80(1), pp.55-63.	2280.30079	12
Naja_nigricollis	Elapidae	282	Boback, S. M. & Guyer, C. A test of reproductive power in snakes. Ecology 89, 1428-1435 (2008)	3060	253.9747192	275	Minton S.A. (1974) Venom Diseases. Ed. Thomas C.C., Springfield, Illinois.	0.63	iv	mammal	Mus_musculus	Kopeyan et al 1973	0	0	12.2	36.6	11	0	40.2	no	Luiselli, L., Angelici, F.M. and Akani, G.C., 2002. Comparative feeding strategies and dietary plasticity of the sympatric cobras Naja melanoleuca and Naja nigricollis in three diverging Afrotropical habitats. Canadian Journal of Zoology, 80(1), pp.55-63.	2280.30079	12
Naja_nigricollis	Elapidae	282	Boback, S. M. & Guyer, C. A test of reproductive power in snakes. Ecology 89, 1428-1435 (2008)	3060	253.9747192	275	Minton S.A. (1974) Venom Diseases. Ed. Thomas C.C., Springfield, Illinois.	2.8	ip	mammal	Mus_musculus	Kabara, J.J. and Fischer, G., 1972. Methodology for the isolation of low molecular weight toxins from snake venoms. Toxicon, 10(3), pp.227-238.	0	0	12.2	36.6	11	0	40.2	no	Luiselli, L., Angelici, F.M. and Akani, G.C., 2002. Comparative feeding strategies and dietary plasticity of the sympatric cobras Naja melanoleuca and Naja nigricollis in three diverging Afrotropical habitats. Canadian Journal of Zoology, 80(1), pp.55-63.	2280.30079	12
Naja_nigricollis	Elapidae	282	Boback, S. M. & Guyer, C. A test of reproductive power in snakes. Ecology 89, 1428-1435 (2008)	3060	253.9747192	275	Minton S.A. (1974) Venom Diseases. Ed. Thomas C.C., Springfield, Illinois.	0.272	ip	mammal	Mus_musculus	Mohamed et al 1974	0	0	12.2	36.6	11	0	40.2	no	Luiselli, L., Angelici, F.M. and Akani, G.C., 2002. Comparative feeding strategies and dietary plasticity of the sympatric cobras Naja melanoleuca and Naja nigricollis in three diverging Afrotropical habitats. Canadian Journal of Zoology, 80(1), pp.55-63.	2280.30079	12
Naja_nigricollis	Elapidae	282	Boback, S. M. & Guyer, C. A test of reproductive power in snakes. Ecology 89, 1428-1435 (2008)	3060	253.9747192	275	Minton S.A. (1974) Venom Diseases. Ed. Thomas C.C., Springfield, Illinois.	0.4	ip	mammal	Mus_musculus	Mohamed et al 1973	0	0	12.2	36.6	11	0	40.2	no	Luiselli, L., Angelici, F.M. and Akani, G.C., 2002. Comparative feeding strategies and dietary plasticity of the sympatric cobras Naja melanoleuca and Naja nigricollis in three diverging Afrotropical habitats. Canadian Journal of Zoology, 80(1), pp.55-63.	2280.30079	12
Naja_nigricollis	Elapidae	282	Boback, S. M. & Guyer, C. A test of reproductive power in snakes. Ecology 89, 1428-1435 (2008)	3060	253.9747192	275	Minton S.A. (1974) Venom Diseases. Ed. Thomas C.C., Springfield, Illinois.	1.2	iv	mammal	Mus_musculus	Ovadia and Kochva 1977	0	0	12.2	36.6	11	0	40.2	no	Luiselli, L., Angelici, F.M. and Akani, G.C., 2002. Comparative feeding strategies and dietary plasticity of the sympatric cobras Naja melanoleuca and Naja nigricollis in three diverging Afrotropical habitats. Canadian Journal of Zoology, 80(1), pp.55-63.	2280.30079	12
Naja_nigricollis	Elapidae	282	Boback, S. M. & Guyer, C. A test of reproductive power in snakes. Ecology 89, 1428-1435 (2008)	3060	253.9747192	275	Minton S.A. (1974) Venom Diseases. Ed. Thomas C.C., Springfield, Illinois.	1.77	sc	mammal	Mus_musculus	Christensen 1979	0	0	12.2	36.6	11	0	40.2	no	Luiselli, L., Angelici, F.M. and Akani, G.C., 2002. Comparative feeding strategies and dietary plasticity of the sympatric cobras Naja melanoleuca and Naja nigricollis in three diverging Afrotropical habitats. Canadian Journal of Zoology, 80(1), pp.55-63.	2280.30079	12
Naja_nigricollis	Elapidae	282	Boback, S. M. & Guyer, C. A test of reproductive power in snakes. Ecology 89, 1428-1435 (2008)	3060	253.9747192	275	Minton S.A. (1974) Venom Diseases. Ed. Thomas C.C., Springfield, Illinois.	1.35	iv	mammal	Mus_musculus	Christensen 1979	0	0	12.2	36.6	11	0	40.2	no	Luiselli, L., Angelici, F.M. and Akani, G.C., 2002. Comparative feeding strategies and dietary plasticity of the sympatric cobras Naja melanoleuca and Naja nigricollis in three diverging Afrotropical habitats. Canadian Journal of Zoology, 80(1), pp.55-63.	2280.30079	12
Naja_nigricollis	Elapidae	282	Boback, S. M. & Guyer, C. A test of reproductive power in snakes. Ecology 89, 1428-1435 (2008)	3060	253.9747192	275	Minton S.A. (1974) Venom Diseases. Ed. Thomas C.C., Springfield, Illinois.	0.44	im	mammal	Mus_musculus	Mohamed and Nawar 1975	0	0	12.2	36.6	11	0	40.2	no	Luiselli, L., Angelici, F.M. and Akani, G.C., 2002. Comparative feeding strategies and dietary plasticity of the sympatric cobras Naja melanoleuca and Naja nigricollis in three diverging Afrotropical habitats. Canadian Journal of Zoology, 80(1), pp.55-63.	2280.30079	12
Naja_nigricollis	Elapidae	282	Boback, S. M. & Guyer, C. A test of reproductive power in snakes. Ecology 89, 1428-1435 (2008)	3060	253.9747192	275	Minton S.A. (1974) Venom Diseases. Ed. Thomas C.C., Springfield, Illinois.	3.06	sc	mammal	Mus_musculus	Minton, SA (1967). Paraspecific protection by elapid and sea snake antivenins. Toxicon 5 (1): 47_55. doi:10.1016/0041-0101(67)90118-3.	0	0	12.2	36.6	11	0	40.2	no	Luiselli, L., Angelici, F.M. and Akani, G.C., 2002. Comparative feeding strategies and dietary plasticity of the sympatric cobras Naja melanoleuca and Naja nigricollis in three diverging Afrotropical habitats. Canadian Journal of Zoology, 80(1), pp.55-63.	2280.30079	12
Naja_nivea	Elapidae	187	Phelps, T. "Observations of the Cape cobra, Naja nivea (Serpentes: Elapidae) in the DeHoop Nature Reserve, Western Cape Province, South Africa". Herpetological Bulletin. Cape Reptile Institute. Retrieved 19 January 2012.	1138	234.0170496	125	Minton S.A. (1974) Venom Diseases. Ed. Thomas C.C., Springfield, Illinois.	0.59	ip	mammal	Mus_musculus	Kabara, J.J. and Fischer, G., 1972. Methodology for the isolation of low molecular weight toxins from snake venoms. Toxicon, 10(3), pp.227-238.	0	0	21	32	4	0	43	no	Shine, R., Branch, W.R., Webb, J.K., Harlow, P.S., Shine, T. and Keogh, J.S., 2007. Ecology of cobras from southern Africa. Journal of Zoology, 272(2), pp.183-193.; Phelps, T., 2007. Observations of the Cape cobra, Naja nivea (Serpentes: Elapidae) in the DeHoop Nature Reserve, Western Cape Province, South Africa. Herpetological bulletin, (99), pp.29-35.	1774.122034	11
Naja_nivea	Elapidae	187	Phelps, T. "Observations of the Cape cobra, Naja nivea (Serpentes: Elapidae) in the DeHoop Nature Reserve, Western Cape Province, South Africa". Herpetological Bulletin. Cape Reptile Institute. Retrieved 19 January 2012.	1138	234.0170496	125	Minton S.A. (1974) Venom Diseases. Ed. Thomas C.C., Springfield, Illinois.	0.4	sc	mammal	Mus_musculus	Minton, SA (1967). Paraspecific protection by elapid and sea snake antivenins. Toxicon 5 (1): 47_55. doi:10.1016/0041-0101(67)90118-3.	0	0	21	32	4	0	43	no	Shine, R., Branch, W.R., Webb, J.K., Harlow, P.S., Shine, T. and Keogh, J.S., 2007. Ecology of cobras from southern Africa. Journal of Zoology, 272(2), pp.183-193.; Phelps, T., 2007. Observations of the Cape cobra, Naja nivea (Serpentes: Elapidae) in the DeHoop Nature Reserve, Western Cape Province, South Africa. Herpetological bulletin, (99), pp.29-35.	1774.122034	11
Naja_nivea	Elapidae	187	Phelps, T. "Observations of the Cape cobra, Naja nivea (Serpentes: Elapidae) in the DeHoop Nature Reserve, Western Cape Province, South Africa". Herpetological Bulletin. Cape Reptile Institute. Retrieved 19 January 2012.	1138	234.0170496	125	Minton S.A. (1974) Venom Diseases. Ed. Thomas C.C., Springfield, Illinois.	0.72	sc	mammal	Mus_musculus	Christensen 1979	0	0	21	32	4	0	43	no	Shine, R., Branch, W.R., Webb, J.K., Harlow, P.S., Shine, T. and Keogh, J.S., 2007. Ecology of cobras from southern Africa. Journal of Zoology, 272(2), pp.183-193.; Phelps, T., 2007. Observations of the Cape cobra, Naja nivea (Serpentes: Elapidae) in the DeHoop Nature Reserve, Western Cape Province, South Africa. Herpetological bulletin, (99), pp.29-35.	1774.122034	11
Naja_nivea	Elapidae	187	Phelps, T. "Observations of the Cape cobra, Naja nivea (Serpentes: Elapidae) in the DeHoop Nature Reserve, Western Cape Province, South Africa". Herpetological Bulletin. Cape Reptile Institute. Retrieved 19 January 2012.	1138	234.0170496	125	Minton S.A. (1974) Venom Diseases. Ed. Thomas C.C., Springfield, Illinois.	0.57	iv	mammal	Mus_musculus	Christensen 1979	0	0	21	32	4	0	43	no	Shine, R., Branch, W.R., Webb, J.K., Harlow, P.S., Shine, T. and Keogh, J.S., 2007. Ecology of cobras from southern Africa. Journal of Zoology, 272(2), pp.183-193.; Phelps, T., 2007. Observations of the Cape cobra, Naja nivea (Serpentes: Elapidae) in the DeHoop Nature Reserve, Western Cape Province, South Africa. Herpetological bulletin, (99), pp.29-35.	1774.122034	11
Naja_nivea	Elapidae	187	Phelps, T. "Observations of the Cape cobra, Naja nivea (Serpentes: Elapidae) in the DeHoop Nature Reserve, Western Cape Province, South Africa". Herpetological Bulletin. Cape Reptile Institute. Retrieved 19 January 2012.	1138	234.0170496	125	Minton S.A. (1974) Venom Diseases. Ed. Thomas C.C., Springfield, Illinois.	0.2	ip	mammal	Mus_musculus	Mohamed et al 1974	0	0	21	32	4	0	43	no	Shine, R., Branch, W.R., Webb, J.K., Harlow, P.S., Shine, T. and Keogh, J.S., 2007. Ecology of cobras from southern Africa. Journal of Zoology, 272(2), pp.183-193.; Phelps, T., 2007. Observations of the Cape cobra, Naja nivea (Serpentes: Elapidae) in the DeHoop Nature Reserve, Western Cape Province, South Africa. Herpetological bulletin, (99), pp.29-35.	1774.122034	11
Natrix_tessellata	Natricidae	100	Boback, S. M. & Guyer, C. A test of reproductive power in snakes. Ecology 89, 1428-1435 (2008)	132	417.1275934	2	Weinstein, S.A. and Kardong, K.V., 1994. Properties of Duvernoy's secretions from opisthoglyphous and aglyphous colubrid snakes. Toxicon, 32(10), pp.1161-1185.	25	iv	mammal	Mus_musculus	Mackessy, S.P., 2002. Biochemistry and pharmacology of colubrid snake venoms. Journal of Toxicology: Toxin Reviews, 21(1-2), pp.43-83.	96.9	0	3.1	0	0	0	0	no	Luiselli, L., Capizzi, D., Filippi, E., Anibaldi, C., Rugiero, L. and Capula, M., 2007. Comparative diets of three populations of an aquatic snake (Natrix tessellata, Colubridae) from Mediterranean streams with different hydric regimes. Copeia, 2007(2), pp.426-435.	1859.09055	12
Ophiophagus_hannah	Elapidae	585	Boback, S. M. & Guyer, C. A test of reproductive power in snakes. Ecology 89, 1428-1435 (2008)	17723	158.175	316	Broad, A. J., Sutherland, S. K., Coulter, A.R. (1979). The lethality in mice of dangerous Australian and other snake venoms. Toxicon (17). 664-667. 11. ; Minton S.A. (1974) Venom Diseases. Ed. Thomas C.C., Springfield, Illinois; Gopalakrishnakone, P. and Chou, L.M., 1990. Snakes of medical importance (Asia-Pacific region). National University of Singapore.	1.8	sc	mammal	Mus_musculus	Broad, A. J., Sutherland, S. K., Coulter, A.R. (1979). The lethality in mice of dangerous Australian and other snake venoms. Toxicon (17). 664-667. 11.	0	0	0	100	0	0	0	no	Herpetological Review 42(2) 2011	0	1
Ophiophagus_hannah	Elapidae	585	Boback, S. M. & Guyer, C. A test of reproductive power in snakes. Ecology 89, 1428-1435 (2008)	17723	158.175	316	Broad, A. J., Sutherland, S. K., Coulter, A.R. (1979). The lethality in mice of dangerous Australian and other snake venoms. Toxicon (17). 664-667. 11. ; Minton S.A. (1974) Venom Diseases. Ed. Thomas C.C., Springfield, Illinois; Gopalakrishnakone, P. and Chou, L.M., 1990. Snakes of medical importance (Asia-Pacific region). National University of Singapore.	1.725	sc	mammal	Mus_musculus	Minton, SA (1967). Paraspecific protection by elapid and sea snake antivenins. Toxicon 5 (1): 47_55. doi:10.1016/0041-0101(67)90118-3.	0	0	0	100	0	0	0	no	Herpetological Review 42(2) 2011	0	1
Ophiophagus_hannah	Elapidae	585	Boback, S. M. & Guyer, C. A test of reproductive power in snakes. Ecology 89, 1428-1435 (2008)	17723	158.175	316	Broad, A. J., Sutherland, S. K., Coulter, A.R. (1979). The lethality in mice of dangerous Australian and other snake venoms. Toxicon (17). 664-667. 11. ; Minton S.A. (1974) Venom Diseases. Ed. Thomas C.C., Springfield, Illinois; Gopalakrishnakone, P. and Chou, L.M., 1990. Snakes of medical importance (Asia-Pacific region). National University of Singapore.	1.1	ip	mammal	Mus_musculus	Danpaiboon, W., Reamtong, O., Sookrung, N., Seesuay, W., Sakolvaree, Y., Thanongsaksrikul, J., Dong-din-on, F., Srimanote, P., Thueng-in, K. and Chaicumpa, W., 2014. Ophiophagus hannah venom: proteome, components bound by Naja kaouthia antivenin and neutralization by N. kaouthia neurotoxin-specific human ScFv. Toxins, 6(5), pp.1526-1558.	0	0	0	100	0	0	0	no	Herpetological Review 42(2) 2011	0	1
Ophiophagus_hannah	Elapidae	585	Boback, S. M. & Guyer, C. A test of reproductive power in snakes. Ecology 89, 1428-1435 (2008)	17723	158.175	316	Broad, A. J., Sutherland, S. K., Coulter, A.R. (1979). The lethality in mice of dangerous Australian and other snake venoms. Toxicon (17). 664-667. 11. ; Minton S.A. (1974) Venom Diseases. Ed. Thomas C.C., Springfield, Illinois; Gopalakrishnakone, P. and Chou, L.M., 1990. Snakes of medical importance (Asia-Pacific region). National University of Singapore.	0.59	im	mammal	Mus_musculus	Danpaiboon, W., Reamtong, O., Sookrung, N., Seesuay, W., Sakolvaree, Y., Thanongsaksrikul, J., Dong-din-on, F., Srimanote, P., Thueng-in, K. and Chaicumpa, W., 2014. Ophiophagus hannah venom: proteome, components bound by Naja kaouthia antivenin and neutralization by N. kaouthia neurotoxin-specific human ScFv. Toxins, 6(5), pp.1526-1558.	0	0	0	100	0	0	0	no	Herpetological Review 42(2) 2011	0	1
Oxyuranus_microlepidotus	Elapidae	250	Boback, S. M. & Guyer, C. A test of reproductive power in snakes. Ecology 89, 1428-1435 (2008)	2290	133.1160869	53	Broad, A. J., Sutherland, S. K., Coulter, A.R. (1979). The lethality in mice of dangerous Australian and other snake venoms. Toxicon (17). 664-667. 11.; Mirtschin, P.J., Dunstan, N., Hough, B., Hamilton, E., Klein, S., Lucas, J., Millar, D., Madaras, F. and Nias, T., 2006. Venom yields from Australian and some other species of snakes. Ecotoxicology, 15(6), pp.531-538.	0.025	sc	mammal	Mus_musculus	Broad, A. J., Sutherland, S. K., Coulter, A.R. (1979). The lethality in mice of dangerous Australian and other snake venoms. Toxicon (17). 664-667. 11.	0	0	0	0	0	0	100	no	Shine, R. and Covacevich, J., 1983. Ecology of highly venomous snakes: the Australian genus Oxyuranus (Elapidae). Journal of Herpetology, pp.60-69.	732.3751847	3
Oxyuranus_scutellatus	Elapidae	336	Boback, S. M. & Guyer, C. A test of reproductive power in snakes. Ecology 89, 1428-1435 (2008)	4666	128.0481117	138	Garnet J.R. (1970) Venomous Australian Animals Dangerous to Man. Commonwealth Serum Laboratories, Parkville, Victoria.; Eds. J. Meier and J. White (1995) Handbook of Clinical Toxicology of Animal Venoms and Poisons. CRC Press, Boca Raton. ; Minton S.A. (1974) Venom Diseases. Ed. Thomas C.C., Springfield, Illinois.	0.099	sc	mammal	Mus_musculus	Broad, A. J., Sutherland, S. K., Coulter, A.R. (1979). The lethality in mice of dangerous Australian and other snake venoms. Toxicon (17). 664-667. 11.	0	0	0	0	0.947368421	0	0.947368421	no	Shine, R. and Covacevich, J., 1983. Ecology of highly venomous snakes: the Australian genus Oxyuranus (Elapidae). Journal of Herpetology, pp.60-69.	800.668966	7
Oxyuranus_scutellatus	Elapidae	336	Boback, S. M. & Guyer, C. A test of reproductive power in snakes. Ecology 89, 1428-1435 (2008)	4666	201.2982137	138	Garnet J.R. (1970) Venomous Australian Animals Dangerous to Man. Commonwealth Serum Laboratories, Parkville, Victoria.; Eds. J. Meier and J. White (1995) Handbook of Clinical Toxicology of Animal Venoms and Poisons. CRC Press, Boca Raton. ; Minton S.A. (1974) Venom Diseases. Ed. Thomas C.C., Springfield, Illinois.	0.02	sc	mammal	Cavia_porcellus	Trethewie 1971 Pathology symptomatology and treatment of snakebite in Australia	0	0	0	0	0.947368421	0	0.947368421	no	Shine, R. and Covacevich, J., 1983. Ecology of highly venomous snakes: the Australian genus Oxyuranus (Elapidae). Journal of Herpetology, pp.60-69.	800.668966	7
Oxyuranus_scutellatus	Elapidae	336	Boback, S. M. & Guyer, C. A test of reproductive power in snakes. Ecology 89, 1428-1435 (2008)	4666	128.0481117	138	Garnet J.R. (1970) Venomous Australian Animals Dangerous to Man. Commonwealth Serum Laboratories, Parkville, Victoria.; Eds. J. Meier and J. White (1995) Handbook of Clinical Toxicology of Animal Venoms and Poisons. CRC Press, Boca Raton. ; Minton S.A. (1974) Venom Diseases. Ed. Thomas C.C., Springfield, Illinois.	0.12	sc	mammal	Mus_musculus	Trethewie 1971 Pathology symptomatology and treatment of snakebite in Australia	0	0	0	0	0.947368421	0	0.947368421	no	Shine, R. and Covacevich, J., 1983. Ecology of highly venomous snakes: the Australian genus Oxyuranus (Elapidae). Journal of Herpetology, pp.60-69.	800.668966	7
Oxyuranus_scutellatus	Elapidae	336	Boback, S. M. & Guyer, C. A test of reproductive power in snakes. Ecology 89, 1428-1435 (2008)	4666	128.0481117	138	Garnet J.R. (1970) Venomous Australian Animals Dangerous to Man. Commonwealth Serum Laboratories, Parkville, Victoria.; Eds. J. Meier and J. White (1995) Handbook of Clinical Toxicology of Animal Venoms and Poisons. CRC Press, Boca Raton. ; Minton S.A. (1974) Venom Diseases. Ed. Thomas C.C., Springfield, Illinois.	0.065	sc	mammal	Mus_musculus	Fohlman 1979	0	0	0	0	0.947368421	0	0.947368421	no	Shine, R. and Covacevich, J., 1983. Ecology of highly venomous snakes: the Australian genus Oxyuranus (Elapidae). Journal of Herpetology, pp.60-69.	800.668966	7
Oxyuranus_scutellatus	Elapidae	336	Boback, S. M. & Guyer, C. A test of reproductive power in snakes. Ecology 89, 1428-1435 (2008)	4666	128.0481117	138	Garnet J.R. (1970) Venomous Australian Animals Dangerous to Man. Commonwealth Serum Laboratories, Parkville, Victoria.; Eds. J. Meier and J. White (1995) Handbook of Clinical Toxicology of Animal Venoms and Poisons. CRC Press, Boca Raton. ; Minton S.A. (1974) Venom Diseases. Ed. Thomas C.C., Springfield, Illinois.	0.16	iv	mammal	Mus_musculus	Handbook of Natural Toxins: Reptile Venoms and Toxins	0	0	0	0	0.947368421	0	0.947368421	no	Shine, R. and Covacevich, J., 1983. Ecology of highly venomous snakes: the Australian genus Oxyuranus (Elapidae). Journal of Herpetology, pp.60-69.	800.668966	7
Pelamis_platura	Elapidae	100	Boback, S. M. & Guyer, C. A test of reproductive power in snakes. Ecology 89, 1428-1435 (2008)	252	419	1.5	Minton S.A. (1983) Lethal toxicity of venoms of snakes from the Coral Sea. Toxicon, Vol. 21, No. 6, pp 901-902. ; Pickwell G.V., Vick J.A., Shipman W.H. and Grenan W.M. (1972) Production, toxicity and preliminary pharmacology of venom from the sea snake Pelamis platurus. In : Food-drugs from the Sea. Ed. Worthen L.R., Marine Technology Society, Washington DC, pp 247-265. ; Heatwole H. (1999) Sea …	0.067	sc	mammal	Mus_musculus	Minton 1983. Lethal Toxicity of venoms of snakes from the coral sea Toxicon 21:901	100	0	0	0	0	0	0	no	Glodek, G. S. and Voris, H. K., 1982. Marine snake diets: prey composition, diversity and overlap. Copeia. 1982(3): 661-66.	0	1
Pelamis_platura	Elapidae	100	Boback, S. M. & Guyer, C. A test of reproductive power in snakes. Ecology 89, 1428-1435 (2008)	252	419	1.5	Minton S.A. (1983) Lethal toxicity of venoms of snakes from the Coral Sea. Toxicon, Vol. 21, No. 6, pp 901-902. ; Pickwell G.V., Vick J.A., Shipman W.H. and Grenan W.M. (1972) Production, toxicity and preliminary pharmacology of venom from the sea snake Pelamis platurus. In : Food-drugs from the Sea. Ed. Worthen L.R., Marine Technology Society, Washington DC, pp 247-265. ; Heatwole H. (1999) Sea …	0.18	iv	mammal	Mus_musculus	Mackessy, S.P. and Tu, A.T., 1993. Biology of the sea snakes and biochemistry of their venoms. Toxin-related Diseases: Poisons Originating from Plants, Animals and Spoilage. New Delhi: Oxford & IBH Publishing Co, pp.305-51.	100	0	0	0	0	0	0	no	Glodek, G. S. and Voris, H. K., 1982. Marine snake diets: prey composition, diversity and overlap. Copeia. 1982(3): 661-66.	0	1
Pelamis_platura	Elapidae	100	Boback, S. M. & Guyer, C. A test of reproductive power in snakes. Ecology 89, 1428-1435 (2008)	252	419	1.5	Minton S.A. (1983) Lethal toxicity of venoms of snakes from the Coral Sea. Toxicon, Vol. 21, No. 6, pp 901-902. ; Pickwell G.V., Vick J.A., Shipman W.H. and Grenan W.M. (1972) Production, toxicity and preliminary pharmacology of venom from the sea snake Pelamis platurus. In : Food-drugs from the Sea. Ed. Worthen L.R., Marine Technology Society, Washington DC, pp 247-265. ; Heatwole H. (1999) Sea …	0.435	iv	mammal	Mus_musculus	Handbook of Natural Toxins: Reptile Venoms and Toxins	100	0	0	0	0	0	0	no	Glodek, G. S. and Voris, H. K., 1982. Marine snake diets: prey composition, diversity and overlap. Copeia. 1982(3): 661-66.	0	1
Pelamis_platura	Elapidae	100	Boback, S. M. & Guyer, C. A test of reproductive power in snakes. Ecology 89, 1428-1435 (2008)	252	419	1.5	Minton S.A. (1983) Lethal toxicity of venoms of snakes from the Coral Sea. Toxicon, Vol. 21, No. 6, pp 901-902. ; Pickwell G.V., Vick J.A., Shipman W.H. and Grenan W.M. (1972) Production, toxicity and preliminary pharmacology of venom from the sea snake Pelamis platurus. In : Food-drugs from the Sea. Ed. Worthen L.R., Marine Technology Society, Washington DC, pp 247-265. ; Heatwole H. (1999) Sea …	0.1	iv	mammal	Mus_musculus	Mackessy, S.P. and Tu, A.T., 1993. Biology of the sea snakes and biochemistry of their venoms. Toxin-related Diseases: Poisons Originating from Plants, Animals and Spoilage. New Delhi: Oxford & IBH Publishing Co, pp.305-51.	100	0	0	0	0	0	0	no	Glodek, G. S. and Voris, H. K., 1982. Marine snake diets: prey composition, diversity and overlap. Copeia. 1982(3): 661-66.	0	1
Pelamis_platura	Elapidae	100	Boback, S. M. & Guyer, C. A test of reproductive power in snakes. Ecology 89, 1428-1435 (2008)	252	419	1.5	Minton S.A. (1983) Lethal toxicity of venoms of snakes from the Coral Sea. Toxicon, Vol. 21, No. 6, pp 901-902. ; Pickwell G.V., Vick J.A., Shipman W.H. and Grenan W.M. (1972) Production, toxicity and preliminary pharmacology of venom from the sea snake Pelamis platurus. In : Food-drugs from the Sea. Ed. Worthen L.R., Marine Technology Society, Washington DC, pp 247-265. ; Heatwole H. (1999) Sea …	0.44	iv	mammal	Mus_musculus	Mackessy, S.P. and Tu, A.T., 1993. Biology of the sea snakes and biochemistry of their venoms. Toxin-related Diseases: Poisons Originating from Plants, Animals and Spoilage. New Delhi: Oxford & IBH Publishing Co, pp.305-51.	100	0	0	0	0	0	0	no	Glodek, G. S. and Voris, H. K., 1982. Marine snake diets: prey composition, diversity and overlap. Copeia. 1982(3): 661-66.	0	1
Protobothrops_flavoviridis	Viperidae	242	Boback, S. M. & Guyer, C. A test of reproductive power in snakes. Ecology 89, 1428-1435 (2008)	6822	354.72875	212.5	Minton S.A. (1974) Venom Diseases. Ed. Thomas C.C., Springfield, Illinois.; Sawai Y. (1975) Medical treatment of snakebites. 1. Japan and Korea. The Snake, Vol. 7(2), 49-67.	3.75	iv	mammal	Mus_musculus	Brown JH. 1973. Toxicology and Pharmacology of Venoms from Poisonous Snakes. Springfield, Illinois: Charles C. Thomas. 184 pp. LCCCN 73-229. ISBN 0-398-02808-7	0	1	84	10	0	0	5	no	Creer, S., Chou, W.H., Malhotra, A. and Thorpe, R.S., 2002. Offshore insular variation in the diet of the Taiwanese bamboo viper Trimeresurus stejnegeri (Schmidt). Zoological science, 19(8), pp.907-913.	2019.488972	8
Protobothrops_flavoviridis	Viperidae	242	Boback, S. M. & Guyer, C. A test of reproductive power in snakes. Ecology 89, 1428-1435 (2008)	6822	354.72875	212.5	Minton S.A. (1974) Venom Diseases. Ed. Thomas C.C., Springfield, Illinois.; Sawai Y. (1975) Medical treatment of snakebites. 1. Japan and Korea. The Snake, Vol. 7(2), 49-67.	3.81	iv	mammal	Mus_musculus	OHSAKA 1960 PROTEOLYTIC ACTIVITIES OF HABU SNAKE VENOM AND THEIR SEPARATION FROM LETHAL TOXICITY	0	1	84	10	0	0	5	no	Creer, S., Chou, W.H., Malhotra, A. and Thorpe, R.S., 2002. Offshore insular variation in the diet of the Taiwanese bamboo viper Trimeresurus stejnegeri (Schmidt). Zoological science, 19(8), pp.907-913.	2019.488972	8
Protobothrops_flavoviridis	Viperidae	242	Boback, S. M. & Guyer, C. A test of reproductive power in snakes. Ecology 89, 1428-1435 (2008)	6822	354.72875	212.5	Minton S.A. (1974) Venom Diseases. Ed. Thomas C.C., Springfield, Illinois.; Sawai Y. (1975) Medical treatment of snakebites. 1. Japan and Korea. The Snake, Vol. 7(2), 49-67.	3.23	iv	mammal	Mus_musculus	OMORI-SATOH 1967 A SIMPLE AND RAPID METHOD FOR SEPARATING TWO HEMORRHAGIC PRINCIPLES IN THE VENOM OF TRIMERESURUS FLAVOVIRIDIS	0	1	84	10	0	0	5	no	Creer, S., Chou, W.H., Malhotra, A. and Thorpe, R.S., 2002. Offshore insular variation in the diet of the Taiwanese bamboo viper Trimeresurus stejnegeri (Schmidt). Zoological science, 19(8), pp.907-913.	2019.488972	8
Protobothrops_mucrosquamatus	Viperidae	116	Leviton AE, Wogan GOU, Koo MS, Zug GR, Lucas RS, Vindum JV. 2003. The Dangerously Venomous Snakes of Myanmar, Illustrated Checklist with Keys. Proc. Cal. Acad. Sci. 54 (24): 407-462.	803	325.695834	140	Sawai Y. (1976) Medical treatment of snakebites. 2. Southeast Asia. The Snake, Vol. 8(1), pp 1-30.	2.294	ip	mammal	Mus_musculus	Villalta, M., Pla, D., Yang, S.L., Sanz, L., Segura, A., Vargas, M., Chen, P.Y., Herrera, M., Estrada, R., Cheng, Y.F. and Lee, C.D., 2012. Snake venomics and antivenomics of Protobothrops mucrosquamatus and Viridovipera stejnegeri from Taiwan: keys to understand the variable immune response in horses. Journal of proteomics, 75(18), pp.5628-5645.	0	0	0	0	0	0	100	no	Orlov, N., Ananjeva, N. and Khalikov, R., 2002. Natural history of pitvipers in Eastern and Southeastern Asia. Biology of the Vipers, pp.345-361	1461.100183	6
Pseudechis_australis	Elapidae	275	Boback, S. M. & Guyer, C. A test of reproductive power in snakes. Ecology 89, 1428-1435 (2008)	2881	260.0384082	201	Mirtschin, P.J., Dunstan, N., Hough, B., Hamilton, E., Klein, S., Lucas, J., Millar, D., Madaras, F. and Nias, T., 2006. Venom yields from Australian and some other species of snakes. Ecotoxicology, 15(6), pp.531-538.; Eds. J. Meier and J. White (1995) Handbook of Clinical Toxicology of Animal Venoms and Poisons. CRC Press, Boca Raton. ; Minton S.A. (1974) Venom Diseases. Ed. Thomas C.C., Springf…	2.38	sc	mammal	Mus_musculus	Broad, A. J., Sutherland, S. K., Coulter, A.R. (1979). The lethality in mice of dangerous Australian and other snake venoms. Toxicon (17). 664-667. 11.	0	1	20	49	5	2	23	yes	Shine 1987.The evolution of viviparity: ecological correlates of reproductive mode within a genus of Australian snakes (Pseudechis: Elapidae). Copeia 1987:551_563.	3796.754863	43
Pseudechis_colletti	Elapidae	200	Navy, U. Poisonous snakes of the world. US Govt New York: Dover Publications Inc, 203-206 (1991).	2517	267.81975	45	Mirtschin, P.J., Dunstan, N., Hough, B., Hamilton, E., Klein, S., Lucas, J., Millar, D., Madaras, F. and Nias, T., 2006. Venom yields from Australian and some other species of snakes. Ecotoxicology, 15(6), pp.531-538.; Eds. J. Meier and J. White (1995) Handbook of Clinical Toxicology of Animal Venoms and Poisons. CRC Press, Boca Raton. ; Minton S.A. (1974) Venom Diseases. Ed. Thomas C.C., Springf…	2.38	sc	mammal	Mus_musculus	Broad, A. J., Sutherland, S. K., Coulter, A.R. (1979). The lethality in mice of dangerous Australian and other snake venoms. Toxicon (17). 664-667. 11.	0	0	25	0	0	0	75	no	Shine 1987.The evolution of viviparity: ecological correlates of reproductive mode within a genus of Australian snakes (Pseudechis: Elapidae). Copeia 1987:551_563.	915.699998	2
Pseudechis_colletti	Elapidae	200	Navy, U. Poisonous snakes of the world. US Govt New York: Dover Publications Inc, 203-206 (1991).	2517	267.81975	45	Mirtschin, P.J., Dunstan, N., Hough, B., Hamilton, E., Klein, S., Lucas, J., Millar, D., Madaras, F. and Nias, T., 2006. Venom yields from Australian and some other species of snakes. Ecotoxicology, 15(6), pp.531-538.; Eds. J. Meier and J. White (1995) Handbook of Clinical Toxicology of Animal Venoms and Poisons. CRC Press, Boca Raton. ; Minton S.A. (1974) Venom Diseases. Ed. Thomas C.C., Springf…	1.2	ip	mammal	Mus_musculus	Kabara, J.J. and Fischer, G., 1972. Methodology for the isolation of low molecular weight toxins from snake venoms. Toxicon, 10(3), pp.227-238.	0	0	25	0	0	0	75	no	Shine 1987.The evolution of viviparity: ecological correlates of reproductive mode within a genus of Australian snakes (Pseudechis: Elapidae). Copeia 1987:551_563.	915.699998	2
Pseudechis_guttatus	Elapidae	200	Boback, S. M. & Guyer, C. A test of reproductive power in snakes. Ecology 89, 1428-1435 (2008)	1338	298.509	45	Mirtschin, P.J., Dunstan, N., Hough, B., Hamilton, E., Klein, S., Lucas, J., Millar, D., Madaras, F. and Nias, T., 2006. Venom yields from Australian and some other species of snakes. Ecotoxicology, 15(6), pp.531-538.; Eds. J. Meier and J. White (1995) Handbook of Clinical Toxicology of Animal Venoms and Poisons. CRC Press, Boca Raton. ; Minton S.A. (1974) Venom Diseases. Ed. Thomas C.C., Springf…	2.13	sc	mammal	Mus_musculus	Broad, A. J., Sutherland, S. K., Coulter, A.R. (1979). The lethality in mice of dangerous Australian and other snake venoms. Toxicon (17). 664-667. 11.	0	12	40	20	0	0	28	no	Shine 1987.The evolution of viviparity: ecological correlates of reproductive mode within a genus of Australian snakes (Pseudechis: Elapidae). Copeia 1987:551_563.	1873.13798	5
Pseudechis_papuanus	Elapidae	244	Boback, S. M. & Guyer, C. A test of reproductive power in snakes. Ecology 89, 1428-1435 (2008)	2160	158.175	33.3	Minton S.A. (1974) Venom Diseases. Ed. Thomas C.C., Springfield, Illinois.; Freeman, M., Kellaway, C.H., 1934. The venom yields of common Australian poisonous snakes in captivity. Med. J. Aust. 2, 373 _ 377.; Eds. J. Meier and J. White (1995) Handbook of Clinical Toxicology of Animal Venoms and Poisons. CRC Press, Boca Raton.	1.09	sc	mammal	Mus_musculus	Broad, A. J., Sutherland, S. K., Coulter, A.R. (1979). The lethality in mice of dangerous Australian and other snake venoms. Toxicon (17). 664-667. 11.	0	0	0	0	0	0	100	no	Shine 1987.The evolution of viviparity: ecological correlates of reproductive mode within a genus of Australian snakes (Pseudechis: Elapidae). Copeia 1987:551_563.	0	1
Pseudechis_papuanus	Elapidae	244	Boback, S. M. & Guyer, C. A test of reproductive power in snakes. Ecology 89, 1428-1435 (2008)	2160	158.175	33.3	Minton S.A. (1974) Venom Diseases. Ed. Thomas C.C., Springfield, Illinois.; Freeman, M., Kellaway, C.H., 1934. The venom yields of common Australian poisonous snakes in captivity. Med. J. Aust. 2, 373 _ 377.; Eds. J. Meier and J. White (1995) Handbook of Clinical Toxicology of Animal Venoms and Poisons. CRC Press, Boca Raton.	2.52	sc	mammal	Mus_musculus	Meier and J. White (1995) Handbook of Clinical Toxicology of Animal Venoms and Poisons. CRC Press, Boca Raton	0	0	0	0	0	0	100	no	Shine 1987.The evolution of viviparity: ecological correlates of reproductive mode within a genus of Australian snakes (Pseudechis: Elapidae). Copeia 1987:551_563.	0	1
Pseudechis_porphyriacus	Elapidae	250	Boback, S. M. & Guyer, C. A test of reproductive power in snakes. Ecology 89, 1428-1435 (2008)	2290	327.2851282	55	Mirtschin, P.J., Dunstan, N., Hough, B., Hamilton, E., Klein, S., Lucas, J., Millar, D., Madaras, F. and Nias, T., 2006. Venom yields from Australian and some other species of snakes. Ecotoxicology, 15(6), pp.531-538.; Eds. J. Meier and J. White (1995) Handbook of Clinical Toxicology of Animal Venoms and Poisons. CRC Press, Boca Raton.	2.52	sc	mammal	Mus_musculus	Broad, A. J., Sutherland, S. K., Coulter, A.R. (1979). The lethality in mice of dangerous Australian and other snake venoms. Toxicon (17). 664-667. 11.	0	0	61	31	0	0	8	no	Shine 1987.The evolution of viviparity: ecological correlates of reproductive mode within a genus of Australian snakes (Pseudechis: Elapidae). Copeia 1987:551_563.	2727.969472	28
Pseudechis_porphyriacus	Elapidae	250	Boback, S. M. & Guyer, C. A test of reproductive power in snakes. Ecology 89, 1428-1435 (2008)	2290	327.2851282	55	Mirtschin, P.J., Dunstan, N., Hough, B., Hamilton, E., Klein, S., Lucas, J., Millar, D., Madaras, F. and Nias, T., 2006. Venom yields from Australian and some other species of snakes. Ecotoxicology, 15(6), pp.531-538.; Eds. J. Meier and J. White (1995) Handbook of Clinical Toxicology of Animal Venoms and Poisons. CRC Press, Boca Raton.	0.5	iv	mammal	Mus_musculus	Minton, S and Minton, M.R. (1969). Venomous Reptiles. Scribners New York.	0	0	61	31	0	0	8	no	Shine 1987.The evolution of viviparity: ecological correlates of reproductive mode within a genus of Australian snakes (Pseudechis: Elapidae). Copeia 1987:551_563.	2727.969472	28
Pseudechis_porphyriacus	Elapidae	250	Boback, S. M. & Guyer, C. A test of reproductive power in snakes. Ecology 89, 1428-1435 (2008)	2290	327.2851282	55	Mirtschin, P.J., Dunstan, N., Hough, B., Hamilton, E., Klein, S., Lucas, J., Millar, D., Madaras, F. and Nias, T., 2006. Venom yields from Australian and some other species of snakes. Ecotoxicology, 15(6), pp.531-538.; Eds. J. Meier and J. White (1995) Handbook of Clinical Toxicology of Animal Venoms and Poisons. CRC Press, Boca Raton.	2	sc	mammal	Mus_musculus	Minton, S and Minton, M.R. (1969). Venomous Reptiles. Scribners New York.	0	0	61	31	0	0	8	no	Shine 1987.The evolution of viviparity: ecological correlates of reproductive mode within a genus of Australian snakes (Pseudechis: Elapidae). Copeia 1987:551_563.	2727.969472	28
Pseudechis_porphyriacus	Elapidae	250	Boback, S. M. & Guyer, C. A test of reproductive power in snakes. Ecology 89, 1428-1435 (2008)	2290	419.0000021	55	Mirtschin, P.J., Dunstan, N., Hough, B., Hamilton, E., Klein, S., Lucas, J., Millar, D., Madaras, F. and Nias, T., 2006. Venom yields from Australian and some other species of snakes. Ecotoxicology, 15(6), pp.531-538.; Eds. J. Meier and J. White (1995) Handbook of Clinical Toxicology of Animal Venoms and Poisons. CRC Press, Boca Raton.	2.7	im	fish	Carassius_auratus	Berman 1983	0	0	61	31	0	0	8	no	Shine 1987.The evolution of viviparity: ecological correlates of reproductive mode within a genus of Australian snakes (Pseudechis: Elapidae). Copeia 1987:551_563.	2727.969472	28
Rhabdophis_tigrinus	Natricidae	170	Boback, S. M. & Guyer, C. A test of reproductive power in snakes. Ecology 89, 1428-1435 (2008)	456	360.5183152	14.5	Sakai et al. (1983) In : Kochva E. (1987) The origin of snakes and evolution of the venom apparatus. Toxicon, Vol. 25, pp 65-106.	0.27	iv	mammal	Mus_musculus	Mackessy, S.P., 2002. Biochemistry and pharmacology of colubrid snake venoms. Journal of Toxicology: Toxin Reviews, 21(1-2), pp.43-83.	0	0	100	0	0	0	0	no	Hirai, T., 2004. Dietary shifts of frog eating snakes in response to seasonal changes in prey availability. Journal of herpetology, 38(3), pp.455-460.	1419.579942	5
Rhabdophis_tigrinus	Natricidae	170	Boback, S. M. & Guyer, C. A test of reproductive power in snakes. Ecology 89, 1428-1435 (2008)	456	360.5183152	14.5	Sakai et al. (1983) In : Kochva E. (1987) The origin of snakes and evolution of the venom apparatus. Toxicon, Vol. 25, pp 65-106.	9.2	sc	mammal	Mus_musculus	Mackessy, S.P., 2002. Biochemistry and pharmacology of colubrid snake venoms. Journal of Toxicology: Toxin Reviews, 21(1-2), pp.43-83.	0	0	100	0	0	0	0	no	Hirai, T., 2004. Dietary shifts of frog eating snakes in response to seasonal changes in prey availability. Journal of herpetology, 38(3), pp.455-460.	1419.579942	5
Rhabdophis_tigrinus	Natricidae	170	Boback, S. M. & Guyer, C. A test of reproductive power in snakes. Ecology 89, 1428-1435 (2008)	456	360.5183152	14.5	Sakai et al. (1983) In : Kochva E. (1987) The origin of snakes and evolution of the venom apparatus. Toxicon, Vol. 25, pp 65-106.	7.4	im	mammal	Mus_musculus	Mackessy, S.P., 2002. Biochemistry and pharmacology of colubrid snake venoms. Journal of Toxicology: Toxin Reviews, 21(1-2), pp.43-83.	0	0	100	0	0	0	0	no	Hirai, T., 2004. Dietary shifts of frog eating snakes in response to seasonal changes in prey availability. Journal of herpetology, 38(3), pp.455-460.	1419.579942	5
Sistrurus_miliarius	Viperidae	80	Boback, S. M. & Guyer, C. A test of reproductive power in snakes. Ecology 89, 1428-1435 (2008)	272	208.791	25	Minton S.A. (1974) Venom Diseases. Ed. Thomas C.C., Springfield, Illinois.	1	iv	bird	Columba_sp	Githens, T.S., 1935. Studies on the Venoms of North American Pit Vipers. Journal of Immunology, 29(2).	0	0	0	33	33	0	33	no	Allen, W.L., Baddeley, R., Scott-Samuel, N.E. and Cuthill, I.C., 2013. The evolution and function of pattern diversity in snakes. Behavioral Ecology, 24(5), pp.1237-1250.	1142.806978	3
Sistrurus_miliarius	Viperidae	80	Boback, S. M. & Guyer, C. A test of reproductive power in snakes. Ecology 89, 1428-1435 (2008)	272	260.98875	25	Minton S.A. (1974) Venom Diseases. Ed. Thomas C.C., Springfield, Illinois.	2.91	iv	mammal	Mus_musculus	Natural Toxins, Proceedings of the International Symposium on Animal, Plant Microbial Toxins, 6th, 1979," Eaker, D., and T. Waldstroem, eds., Oxford, UK, Pergamon Press Ltd., 1980	0	0	0	33	33	0	33	no	Allen, W.L., Baddeley, R., Scott-Samuel, N.E. and Cuthill, I.C., 2013. The evolution and function of pattern diversity in snakes. Behavioral Ecology, 24(5), pp.1237-1250.	1142.806978	3
Sistrurus_miliarius	Viperidae	80	Boback, S. M. & Guyer, C. A test of reproductive power in snakes. Ecology 89, 1428-1435 (2008)	272	260.98875	25	Minton S.A. (1974) Venom Diseases. Ed. Thomas C.C., Springfield, Illinois.	25.1	sc	mammal	Mus_musculus	Natural Toxins, Proceedings of the International Symposium on Animal, Plant Microbial Toxins, 6th, 1979," Eaker, D., and T. Waldstroem, eds., Oxford, UK, Pergamon Press Ltd., 1980	0	0	0	33	33	0	33	no	Allen, W.L., Baddeley, R., Scott-Samuel, N.E. and Cuthill, I.C., 2013. The evolution and function of pattern diversity in snakes. Behavioral Ecology, 24(5), pp.1237-1250.	1142.806978	3
Sistrurus_miliarius	Viperidae	80	Boback, S. M. & Guyer, C. A test of reproductive power in snakes. Ecology 89, 1428-1435 (2008)	272	260.98875	25	Minton S.A. (1974) Venom Diseases. Ed. Thomas C.C., Springfield, Illinois.	7.19	ip	mammal	Mus_musculus	Gibbs, H.L. and Mackessy, S.P., 2009. Functional basis of a molecular adaptation: prey-specific toxic effects of venom from Sistrurus rattlesnakes. Toxicon, 53(6), pp.672-679.	0	0	0	33	33	0	33	no	Allen, W.L., Baddeley, R., Scott-Samuel, N.E. and Cuthill, I.C., 2013. The evolution and function of pattern diversity in snakes. Behavioral Ecology, 24(5), pp.1237-1250.	1142.806978	3
Sistrurus_miliarius	Viperidae	80	Boback, S. M. & Guyer, C. A test of reproductive power in snakes. Ecology 89, 1428-1435 (2008)	272	355.608	25	Minton S.A. (1974) Venom Diseases. Ed. Thomas C.C., Springfield, Illinois.	93.9	ip	amphibian	Rana_pipens	Gibbs, H.L. and Mackessy, S.P., 2009. Functional basis of a molecular adaptation: prey-specific toxic effects of venom from Sistrurus rattlesnakes. Toxicon, 53(6), pp.672-679.	0	0	0	33	33	0	33	no	Allen, W.L., Baddeley, R., Scott-Samuel, N.E. and Cuthill, I.C., 2013. The evolution and function of pattern diversity in snakes. Behavioral Ecology, 24(5), pp.1237-1250.	1142.806978	3
Sistrurus_miliarius	Viperidae	80	Boback, S. M. & Guyer, C. A test of reproductive power in snakes. Ecology 89, 1428-1435 (2008)	272	246.35325	25	Minton S.A. (1974) Venom Diseases. Ed. Thomas C.C., Springfield, Illinois.	0.66	ip	lizard	Anolis_sagrei	Gibbs, H.L. and Mackessy, S.P., 2009. Functional basis of a molecular adaptation: prey-specific toxic effects of venom from Sistrurus rattlesnakes. Toxicon, 53(6), pp.672-679.	0	0	0	33	33	0	33	no	Allen, W.L., Baddeley, R., Scott-Samuel, N.E. and Cuthill, I.C., 2013. The evolution and function of pattern diversity in snakes. Behavioral Ecology, 24(5), pp.1237-1250.	1142.806978	3
Thamnophis_elegans	Natricidae	107	Boback, S. M. & Guyer, C. A test of reproductive power in snakes. Ecology 89, 1428-1435 (2008)	154	508.925	0.23	Vest, D.K. The toxic Duvernoy�s secretion of the wandering garter snake, Thamnophis elegans vagrans. Toxicon 1981, 19, 831_839. ; Weinstein, S.A. and Smith, L.A., 1993. Chromatographic profiles and properties of Duvernoy's secretions from some boigine and dispholidine colubrids. Herpetologica, pp.78-94.	13.85	ip	mammal	Mus_musculus	Vest 1981	34.6	65.4	0	0	0	0	0	no	Weaver, R.E., Bauer, B.A., Weaver, K.S., McEwen, D.C. and Clark, W.H., 2010. Diet and foraging behavior of the terrestrial gartersnake (Thamnophis elegans) along a stream within the shrub-steppe of central Washington state. Northwestern Naturalist, 91(3), pp.309-317.	1089.999996	2
Thelotornis_capensis	Colubridae	110	Shine, R., Harlow, P.S., Branch, W.R. and Webb, J.K., 1996. Life on the lowest branch: sexual dimorphism, diet, and reproductive biology of an African twig snake, Thelotornis capensis (Serpentes, Colubridae). Copeia, pp.290-299.	165	328.1127438	2.25	Weinstein, S.A. and Smith, L.A., 1993. Chromatographic profiles and properties of Duvernoy's secretions from some boigine and dispholidine colubrids. Herpetologica, pp.78-94.	0.5	ip	mammal	Mus_musculus	Weinstein, S.A. and Smith, L.A., 1993. Chromatographic profiles and properties of Duvernoy's secretions from some boigine and dispholidine colubrids. Herpetologica, pp.78-94.	0	0	27	71	2	0	0	no	Shine, R., Harlow, P.S., Branch, W.R. and Webb, J.K., 1996. Life on the lowest branch: sexual dimorphism, diet, and reproductive biology of an African twig snake, Thelotornis capensis (Serpentes, Colubridae). Copeia, pp.290-299.	3118.791231	18
Tropidechis_carinatus	Elapidae	100	Boback, S. M. & Guyer, C. A test of reproductive power in snakes. Ecology 89, 1428-1435 (2008)	252	193.3548069	13	Mirtschin, P.J., Dunstan, N., Hough, B., Hamilton, E., Klein, S., Lucas, J., Millar, D., Madaras, F. and Nias, T., 2006. Venom yields from Australian and some other species of snakes. Ecotoxicology, 15(6), pp.531-538.; Eds. J. Meier and J. White (1995) Handbook of Clinical Toxicology of Animal Venoms and Poisons. CRC Press, Boca Raton.	1.36	sc	mammal	Mus_musculus	Broad, A. J., Sutherland, S. K., Coulter, A.R. (1979). The lethality in mice of dangerous Australian and other snake venoms. Toxicon (17). 664-667. 11.	0	0	41	4	7	0	48	no	Shine, R., and N. Charles. 1982. Ecology of the Australian elapid snake Tropidechis carinatus. Journal of Herpetology 16:383_387.	1641.488909	6
Vipera_aspis	Viperidae	65	Gentilli, A., Cardini, A., Fontaneto, D. and Zuffi, M.A.L., 2009. The phylogenetic signal in cranial morphology of Vipera aspis: a contribution from geometric morphometrics. The Herpetological Journal, 19(2), pp.69-77.	226	139.3236852	9	Boquet P (1964). "Venins de serpents (1ere partie) physio-pathologie de l'envenimation et proprietes biologiques des venins". Toxicon (in French) 2 (1): 5_41.	3	sc	mammal	Mus_musculus	Brown JH. 1973. Toxicology and Pharmacology of Venoms from Poisonous Snakes. Springfield, Illinois: Charles C. Thomas. 184 pp. LCCCN 73-229. ISBN 0-398-02808-7	0	0	0	4	0	0	96	no	Canova, L. and Gentilli, A., 2008. Diet of the asp viper Vipera aspis in woodland habitats of the Po plain (NW Italy). Acta Herpetologica, 3(2), pp.175-178.	967.3166606	3
Vipera_aspis	Viperidae	65	Gentilli, A., Cardini, A., Fontaneto, D. and Zuffi, M.A.L., 2009. The phylogenetic signal in cranial morphology of Vipera aspis: a contribution from geometric morphometrics. The Herpetological Journal, 19(2), pp.69-77.	226	139.3236852	9	Boquet P (1964). "Venins de serpents (1ere partie) physio-pathologie de l'envenimation et proprietes biologiques des venins". Toxicon (in French) 2 (1): 5_41.	1.015	iv	mammal	Mus_musculus	BOQUET 1964	0	0	0	4	0	0	96	no	Canova, L. and Gentilli, A., 2008. Diet of the asp viper Vipera aspis in woodland habitats of the Po plain (NW Italy). Acta Herpetologica, 3(2), pp.175-178.	967.3166606	3
Vipera_aspis	Viperidae	65	Gentilli, A., Cardini, A., Fontaneto, D. and Zuffi, M.A.L., 2009. The phylogenetic signal in cranial morphology of Vipera aspis: a contribution from geometric morphometrics. The Herpetological Journal, 19(2), pp.69-77.	226	139.3236852	9	Boquet P (1964). "Venins de serpents (1ere partie) physio-pathologie de l'envenimation et proprietes biologiques des venins". Toxicon (in French) 2 (1): 5_41.	4.7	im	mammal	Mus_musculus	Tu, A.T., Homma, M. and Hong, B.S., 1969. Hemorrhagic, myonecrotic, thrombotic and proteolytic activities of viper venoms. Toxicon, 6(3), pp.175in7177-176in10178.	0	0	0	4	0	0	96	no	Canova, L. and Gentilli, A., 2008. Diet of the asp viper Vipera aspis in woodland habitats of the Po plain (NW Italy). Acta Herpetologica, 3(2), pp.175-178.	967.3166606	3
Vipera_latastei	Viperidae	73	Brito, J. C. A. R. (2011). V�bora hocicuda _ Vipera latastei. En: Enciclopedia Virtual de los Vertebrados Espa_oles. Salvador, A., Marco, A. (Eds.). Museo Nacional de Ciencias Naturales, Madrid. http://www.vertebradosibericos.org/	209	174.6856218	14	Mirtschin, P.J., Dunstan, N., Hough, B., Hamilton, E., Klein, S., Lucas, J., Millar, D., Madaras, F. and Nias, T., 2006. Venom yields from Australian and some other species of snakes. Ecotoxicology, 15(6), pp.531-538.	21.56	iv	mammal	Mus_musculus	Brito, J. C. A. R. (2011). V�bora hocicuda _ Vipera latastei. En: Enciclopedia Virtual de los Vertebrados Espa_oles. Salvador, A., Marco, A. (Eds.). Museo Nacional de Ciencias Naturales, Madrid. http://www.vertebradosibericos.org/	0	1.7	1.7	20.7	6.1	0	69.8	no	Santos, X., Llorente, G.A., Pleguezuelos, J.M., Brito, J.C., Fahd, S. and Parellada, X., 2007. Variation in the diet of the Lataste's viper Vipera latastei in the Iberian Peninsula: seasonal, sexual and size-related effects. Animal Biology, 57(1), pp.49-61.	2833.7096	18
